# Supplementary material for: Transcriptome and metabolome response of eggplant against Ralstonia solanacearum infection
Source: PeerJ. 2023 Jan 11;11:e14658. doi: 10.7717/peerj.14658 (PMC9840387; doi:10.7717/peerj.14658)
Supplement: Supplemental Information 4 [file peerj-11-14658-s004.xlsx]

## Sheet: Tabel S1
Table S1 The DEGs of eggplant after inoculation the R.solanacearum in R-0h _Vs_R-24h.
ID	R0h-1_fpkm	R0h-2_fpkm	R0h-3_fpkm	R24h-1_fpkm	R24h-2_fpkm	R24h-3_fpkm	R0h-1_count	R0h-2_count	R0h-3_count	R24h-1_count	R24h-2_count	R24h-3_count	FoldChange	log2FoldChange	pvalue	padj	regulated	chr	start	end	strand	gene_name	gene_description	KEGG	NR	Swissprot	Tremble	KOG	GO	Pfam
SMEL_001g115380.1	5.52	10.64	6.51	9.76	29.22	25.66	77	165	89	127	427	331	3.181	1.669	0.000104445	0.00134461	up	SMEL3Ch01	497310	498289	+	SMEL_001g115380.1.01	--	--	hypothetical protein CQW23_31658 [Capsicum baccatum]	RecName: Full=Dehydrin ERD10; AltName: Full=Low-temperature-induced protein LTI45;	SubName: Full=Uncharacterized protein {ECO:0000313|EMBL:PHT28731.1};	--	GO:0005737,cytoplasm; GO:0005829,cytosol; GO:0019898,extrinsic component of membrane; GO:0016020,membrane; GO:0005634,nucleus; GO:0009506,plasmodesma; GO:0003779,actin binding; GO:0005507,copper ion binding; GO:0016151,nickel cation binding; GO:0031210,phosphatidylcholine binding; GO:0001786,phosphatidylserine binding; GO:0009631,cold acclimation; GO:0050821,protein stabilization; GO:0090559,regu…	Dehydrin
SMEL_001g115400.1	2.98	3.07	0.54	0.74	0.36	0.17	56	64	10	13	7	3	0.215	-2.219	0.00273804	0.0181284	down	SMEL3Ch01	505444	507328	+	SMEL_001g115400.1.01	--	K00679 phospholipid:diacylglycerol acyltransferase [EC:2.3.1.158] | (RefSeq) hypothetical protein (A)	hypothetical protein T459_33572 [Capsicum annuum]	RecName: Full=GDSL esterase/lipase At5g55050; EC=3.1.1.-; AltName: Full=Extracellular lipase At5g55050; Flags: Precursor;	SubName: Full=Uncharacterized protein {ECO:0000313|EMBL:PHT62601.1};	--	GO:0005576,extracellular region; GO:0016298,lipase activity; GO:0016042,lipid catabolic process	GDSL-like Lipase/Acylhydrolase
SMEL_001g115460.1	53.78	49.85	41.41	17.17	12.07	20.7	1357	1398	1024	404	319	483	0.381	-1.391	8.80686e-10	5.41845e-08	down	SMEL3Ch01	548893	551355	+	SMEL_001g115460.1.01	--	K22588 acetylserotonin O-methyltransferase, plant [EC:2.1.1.4] | (RefSeq) O-methyltransferase family 2 protein (A)	PREDICTED: (RS)-norcoclaurine 6-O-methyltransferase-like [Solanum tuberosum]	RecName: Full=Acetylserotonin O-methyltransferase {ECO:0000305}; EC=2.1.1.4 {ECO:0000269|PubMed:26484897}; AltName: Full=N-acetylserotonin O-methyltransferase {ECO:0000303|PubMed:26484897}; Short=AtASMT {ECO:0000303|PubMed:26484897};	SubName: Full=Uncharacterized protein {ECO:0000313|EnsemblPlants:PGSC0003DMT400047988};	Hydroxyindole-O-methyltransferase and related SAM-dependent methyltransferases	GO:0005737,cytoplasm; GO:0017096,acetylserotonin O-methyltransferase activity; GO:0046983,protein dimerization activity; GO:0030187,melatonin biosynthetic process	O-methyltransferase
SMEL_001g115480.1	0.61	0.48	2.45	2.52	4.61	3.34	23	20	91	89	183	117	3.167	1.663	0.0059392	0.0329939	up	SMEL3Ch01	566529	577261	+	SMEL_001g115480.1.01	--	K04365 B-Raf proto-oncogene serine/threonine-protein kinase [EC:2.7.11.1] | (RefSeq) serine/threonine-protein kinase STY46 (A)	PREDICTED: serine/threonine-protein kinase STY46 [Solanum tuberosum]	RecName: Full=Serine/threonine-protein kinase STY46 {ECO:0000305}; EC=2.7.11.1 {ECO:0000269|PubMed:17090544}; AltName: Full=Serine/threonine/tyrosine-protein kinase 46 {ECO:0000303|PubMed:16429265};	SubName: Full=Uncharacterized protein {ECO:0000313|EnsemblPlants:PGSC0003DMT400047982};	Tyrosine kinase specific for activated (GTP-bound) p21cdc42Hs	GO:0005829,cytosol; GO:0005524,ATP binding; GO:0004674,protein serine/threonine kinase activity; GO:0004712,protein serine/threonine/tyrosine kinase activity; GO:0004871,NA; GO:0009658,chloroplast organization; GO:0035556,intracellular signal transduction	Protein tyrosine kinase
SMEL_001g115760.1	26.43	30.51	56.39	88.98	85.47	90.77	428	549	895	1344	1450	1359	2.532	1.34	2.43073e-05	0.000406654	up	SMEL3Ch01	810067	811144	-	SMEL_001g115760.1.01	--	K19042 E3 ubiquitin-protein ligase BOI and related proteins [EC:2.3.2.27] | (RefSeq) probable BOI-related E3 ubiquitin-protein ligase 3 (A)	PREDICTED: probable BOI-related E3 ubiquitin-protein ligase 3 [Solanum tuberosum]	RecName: Full=Probable BOI-related E3 ubiquitin-protein ligase 3; EC=2.3.2.27 {ECO:0000250|UniProtKB:Q9FHE4}; AltName: Full=RING-type E3 ubiquitin transferase BRG3 {ECO:0000305};	SubName: Full=Uncharacterized protein {ECO:0000313|EnsemblPlants:PGSC0003DMT400015829};	Predicted E3 ubiquitin ligase	GO:0005634,nucleus; GO:0046872,metal ion binding; GO:0016740,transferase activity; GO:0006952,defense response; GO:0043161,proteasome-mediated ubiquitin-dependent protein catabolic process; GO:0043067,regulation of programmed cell death	Zinc finger, C3HC4 type (RING finger)
SMEL_001g115770.1	305.32	307.73	384.33	571.7	697.76	606.63	4120	4615	5083	7196	9864	7569	2.061	1.043	5.90223e-08	2.19586e-06	up	SMEL3Ch01	831060	834030	+	SMEL_001g115770.1.01	--	K10752 histone-binding protein RBBP4 | (RefSeq) heavy metal-associated isoprenylated plant protein 26-like (A)	PREDICTED: heavy metal-associated isoprenylated plant protein 26-like [Solanum pennellii]	RecName: Full=Heavy metal-associated isoprenylated plant protein 26 {ECO:0000303|PubMed:21072340, ECO:0000303|PubMed:23368984}; Short=AtHIP26 {ECO:0000303|PubMed:23368984}; Short=AtHIPP26 {ECO:0000303|PubMed:21072340, ECO:0000303|PubMed:23368984}; AltName: Full=Farnesylated protein 6 {ECO:0000303|PubMed:8837031}; Short=AtFP6 {ECO:0000303|PubMed:8837031}; Flags: Precursor;	SubName: Full=Uncharacterized protein {ECO:0000313|EnsemblPlants:Solyc01g111600.2.1};	Copper chaperone	GO:0005737,cytoplasm; GO:0031965,nuclear membrane; GO:0005886,plasma membrane; GO:0009506,plasmodesma; GO:0046870,cadmium ion binding; GO:0005507,copper ion binding; GO:0032791,lead ion binding; GO:0046916,cellular transition metal ion homeostasis; GO:0010286,heat acclimation; GO:0030001,metal ion transport	Heavy-metal-associated domain
SMEL_001g115900.1	489.11	605.28	834.88	1093.58	1386.85	1294.97	13367	18384	22363	27878	39707	32724	2.135	1.094	2.20591e-05	0.00037567	up	SMEL3Ch01	958646	961679	-	SMEL_001g115900.1.01	--	K19366 spartin | (RefSeq) protein EARLY-RESPONSIVE TO DEHYDRATION 7, chloroplastic-like (A)	PREDICTED: protein EARLY-RESPONSIVE TO DEHYDRATION 7, chloroplastic-like [Solanum lycopersicum]	RecName: Full=Protein EARLY-RESPONSIVE TO DEHYDRATION 7, chloroplastic {ECO:0000303|PubMed:8075396}; Flags: Precursor;	SubName: Full=Uncharacterized protein {ECO:0000313|EnsemblPlants:Solyc01g111440.2.1};	--	GO:0009507,chloroplast; GO:0005886,plasma membrane; GO:0007623,circadian rhythm; GO:0009737,response to abscisic acid; GO:0009409,response to cold; GO:0009644,response to high light intensity; GO:0009651,response to salt stress; GO:0009414,response to water deprivation	Senescence-associated protein
SMEL_001g115990.1	1.04	1.37	0.96	0.24	0.37	0.42	32	47	29	7	12	12	0.341	-1.553	0.000832682	0.00704532	down	SMEL3Ch01	1062927	1065583	+	SMEL_001g115990.1.01	--	K01181 endo-1,4-beta-xylanase [EC:3.2.1.8] | (RefSeq) endo-1,4-beta-xylanase-like (A)	PREDICTED: endo-1,4-beta-xylanase UM03411 isoform X1 [Solanum tuberosum]	--	SubName: Full=Uncharacterized protein {ECO:0000313|EnsemblPlants:Solyc01g111340.2.1};	--	GO:0004553,hydrolase activity, hydrolyzing O-glycosyl compounds; GO:0005975,carbohydrate metabolic process	Glycosyl hydrolase family 10
SMEL_001g116000.1	12.55	18.39	11.48	7.89	4.84	5.57	329	536	295	193	133	135	0.475	-1.073	3.056e-05	0.000489792	down	SMEL3Ch01	1071092	1073079	+	SMEL_001g116000.1.01	--	K04733 interleukin-1 receptor-associated kinase 4 [EC:2.7.11.1] | (RefSeq) G-type lectin S-receptor-like serine/threonine-protein kinase At1g67520 (A)	PREDICTED: thaumatin-like protein 1 [Solanum pennellii]	RecName: Full=Thaumatin-like protein 1 {ECO:0000303|PubMed:15988566}; Short=AtTLP1 {ECO:0000303|PubMed:15988566}; Flags: Precursor;	SubName: Full=Uncharacterized protein {ECO:0000313|EnsemblPlants:Solyc01g111330.2.1};	--	GO:0009682,induced systemic resistance; GO:0009617,response to bacterium; GO:0009723,response to ethylene	Thaumatin family
SMEL_001g116060.1	31.8	34.29	59.93	91.96	105.24	132.15	655	785	1210	1767	2271	2517	2.845	1.508	1.45837e-06	3.66121e-05	up	SMEL3Ch01	1116503	1117860	-	SMEL_001g116060.1.01	--	K01771 1-phosphatidylinositol phosphodiesterase [EC:4.6.1.13] | (Kazusa) Lj1g3v3343840.1; - (A)	PREDICTED: PI-PLC X-box domain-containing protein DDB_G0293730-like [Capsicum annuum]	--	SubName: Full=Uncharacterized protein {ECO:0000313|EMBL:PHT41878.1};	Glycosylphosphatidylinositol-specific phospholipase C	--	Phosphatidylinositol-specific phospholipase C, X domain
SMEL_001g116090.1	9.24	7.45	5.41	2.88	1.76	4.25	155	139	89	45	31	66	0.447	-1.162	0.00165835	0.0122818	down	SMEL3Ch01	1131449	1133297	-	SMEL_001g116090.1.01	--	K01870 isoleucyl-tRNA synthetase [EC:6.1.1.5] | (RefSeq) isoleucine--tRNA ligase, chloroplastic/mitochondrial-like (A)	Plant disease resistance response protein, partial [Cynara cardunculus var. scolymus]	RecName: Full=Dirigent protein 23; Short=AtDIR23; Flags: Precursor;	RecName: Full=Dirigent protein {ECO:0000256|RuleBase:RU363099}; Flags: Fragment;	--	GO:0048046,apoplast; GO:0016853,isomerase activity	Dirigent-like protein
SMEL_001g116210.1	3.57	3.09	2.68	4.66	5.41	8.69	189	182	139	230	300	425	2.234	1.16	5.9332e-05	0.00084982	up	SMEL3Ch01	1216408	1251593	-	SMEL_001g116210.1.01	--	K21026 acetylajmaline esterase [EC:3.1.1.80] | (RefSeq) acetylajmalan esterase-like (A)	hypothetical protein T459_32971 [Capsicum annuum]	RecName: Full=Acetylajmalan esterase {ECO:0000303|PubMed:16133216}; EC=3.1.1.80; Flags: Precursor;	SubName: Full=Uncharacterized protein {ECO:0000313|EMBL:PHT63162.1};	--	GO:0033879,acetylajmaline esterase activity; GO:0009820,alkaloid metabolic process	Hormone receptor domain
SMEL_001g116270.1	0.32	0.5	0.49	0.09	0.04	0.04	8	14	12	2	1	1	0.138	-2.857	0.0042009	0.0252813	down	SMEL3Ch01	1303615	1306955	-	SMEL_001g116270.1.01	--	K17964 leucine-rich PPR motif-containing protein, mitochondrial | (RefSeq) pentatricopeptide repeat-containing protein At3g18110, chloroplastic-like (A)	PREDICTED: COBRA-like protein 1 [Solanum tuberosum]	RecName: Full=COBRA-like protein 1; AltName: Full=Protein BRITTLE CULM1-like 6; Flags: Precursor;	RecName: Full=COBRA-like protein {ECO:0000256|PIRNR:PIRNR038122};	--	GO:0031225,anchored component of membrane; GO:0005886,plasma membrane; GO:0016049,cell growth; GO:0010215,cellulose microfibril organization	COBRA-like protein
SMEL_001g116330.1	2.83	2.54	4.09	9.1	5.4	5.86	12	12	17	36	24	23	2.35	1.233	0.00989088	0.048233	up	SMEL3Ch01	1347444	1347704	-	SMEL_001g116330.1.01	--	K14488 SAUR family protein | (RefSeq) auxin-responsive protein SAUR21-like (A)	PREDICTED: auxin-responsive protein SAUR21-like [Solanum pennellii]	RecName: Full=Auxin-responsive protein SAUR20 {ECO:0000305}; AltName: Full=Protein SMALL AUXIN UP RNA 20 {ECO:0000303|PubMed:12036261};	SubName: Full=Uncharacterized protein {ECO:0000313|EnsemblPlants:PGSC0003DMT400004151};	--	GO:0005886,plasma membrane; GO:0009734,auxin-activated signaling pathway; GO:0007275,multicellular organism development; GO:0040008,regulation of growth	Auxin responsive protein
SMEL_001g116500.1	89.79	114.08	157.73	45.73	20.7	47.66	381	538	656	181	92	187	0.343	-1.544	2.43562e-05	0.000407141	down	SMEL3Ch01	1438958	1439218	+	SMEL_001g116500.1.01	--	K14488 SAUR family protein | (RefSeq) auxin-induced protein 15A-like (A)	PREDICTED: auxin-induced protein 15A-like [Solanum lycopersicum]	RecName: Full=Auxin-induced protein 15A;	SubName: Full=Uncharacterized protein {ECO:0000313|EnsemblPlants:Solyc01g110800.2.1};	--	GO:0009734,auxin-activated signaling pathway	Auxin responsive protein
SMEL_001g116820.1	3.17	3.31	1.6	1.63	0.81	1.05	75	87	37	36	20	23	0.477	-1.067	0.00943104	0.0466327	down	SMEL3Ch01	1660660	1666352	-	SMEL_001g116820.1.01	--	K01179 endoglucanase [EC:3.2.1.4] | (RefSeq) endoglucanase 24-like (A)	PREDICTED: endoglucanase 24-like [Solanum tuberosum]	RecName: Full=Endoglucanase 24; EC=3.2.1.4; AltName: Full=Endo-1,4-beta glucanase 24; Flags: Precursor;	RecName: Full=Endoglucanase {ECO:0000256|RuleBase:RU361166}; EC=3.2.1.4 {ECO:0000256|RuleBase:RU361166};	--	GO:0005576,extracellular region; GO:0008810,cellulase activity; GO:0071555,cell wall organization; GO:0030245,cellulose catabolic process	Glycosyl hydrolase family 9
SMEL_001g117300.1	17.36	11.65	22.3	52.64	75.36	65.45	193	144	243	546	878	673	4.126	2.045	6.10025e-12	5.79412e-10	up	SMEL3Ch01	2156825	2157508	-	SMEL_001g117300.1.01	--	--	PREDICTED: uncharacterized protein LOC104105539 isoform X5 [Nicotiana tomentosiformis]	--	SubName: Full=uncharacterized protein LOC104226166 {ECO:0000313|RefSeq:XP_009776378.1};	--	GO:0016021,integral component of membrane	Domain of unknown function (DUF4408)
SMEL_001g117310.1	363.75	360.38	169.38	44.44	28.32	34.02	13241	14579	6043	1509	1080	1145	0.133	-2.909	1.06322e-24	7.55659e-22	down	SMEL3Ch01	2170365	2175195	+	SMEL_001g117310.1.01	--	K00975 glucose-1-phosphate adenylyltransferase [EC:2.7.7.27] | (RefSeq) AGPS1; glucose-1-phosphate adenylyltransferase large subunit 1-like (A)	PREDICTED: glucose-1-phosphate adenylyltransferase large subunit 1 [Solanum tuberosum]	RecName: Full=Glucose-1-phosphate adenylyltransferase large subunit 1; EC=2.7.7.27; AltName: Full=ADP-glucose pyrophosphorylase; AltName: Full=ADP-glucose synthase; AltName: Full=AGPase S; AltName: Full=Alpha-D-glucose-1-phosphate adenyl transferase; Flags: Fragment;	RecName: Full=Glucose-1-phosphate adenylyltransferase {ECO:0000256|RuleBase:RU362093}; EC=2.7.7.27 {ECO:0000256|RuleBase:RU362093}; AltName: Full=ADP-glucose pyrophosphorylase {ECO:0000256|RuleBase:RU362093};	GDP-mannose pyrophosphorylase/mannose-1-phosphate guanylyltransferase	GO:0009501,amyloplast; GO:0009507,chloroplast; GO:0005524,ATP binding; GO:0008878,glucose-1-phosphate adenylyltransferase activity; GO:0005978,glycogen biosynthetic process; GO:0019252,starch biosynthetic process	Nucleotidyl transferase
SMEL_001g117380.1	4.59	4.24	17.86	17.21	28.87	32.64	76	78	290	266	501	500	3.159	1.66	0.00258863	0.0173341	up	SMEL3Ch01	2208415	2210747	+	SMEL_001g117380.1.01	--	K22369 epoxide hydrolase 4 [EC:3.3.-.-] | (RefSeq) uncharacterized protein LOC104235966 (A)	PREDICTED: putative aminoacrylate hydrolase RutD [Solanum tuberosum]	--	SubName: Full=Uncharacterized protein {ECO:0000313|EnsemblPlants:PGSC0003DMT400001929};	Predicted hydrolase/acyltransferase (alpha/beta hydrolase superfamily)	--	alpha/beta hydrolase fold
SMEL_001g117490.1	4.83	5.57	2.58	1.13	1.01	0.45	128	164	67	28	28	11	0.222	-2.173	1.53925e-07	5.09238e-06	down	SMEL3Ch01	2329176	2332591	+	SMEL_001g117490.1.01	--	--	PREDICTED: uncharacterized protein At1g01500-like [Solanum pennellii]	RecName: Full=Uncharacterized protein At1g01500;	SubName: Full=Uncharacterized protein {ECO:0000313|EnsemblPlants:PGSC0003DMT400001913};	--	GO:0016021,integral component of membrane	Uncharacterized protein conserved in bacteria (DUF2237)
SMEL_001g117600.1	128.04	112.82	62.46	49.61	33.62	37.35	3522	3449	1684	1273	969	950	0.442	-1.178	5.19207e-06	0.00011021	down	SMEL3Ch01	2438536	2445165	+	SMEL_001g117600.1.01	--	K12472 epidermal growth factor receptor substrate 15 | (RefSeq) filaggrin-like (A)	PREDICTED: BURP domain-containing protein 5-like [Solanum pennellii]	RecName: Full=BURP domain protein USPL1 {ECO:0000303|PubMed:19639386}; AltName: Full=Unknown seed protein-like protein 1 {ECO:0000303|PubMed:19639386}; Short=AtUSPL1 {ECO:0000303|PubMed:19639386}; Flags: Precursor;	SubName: Full=Uncharacterized protein {ECO:0000313|EnsemblPlants:Solyc01g109500.2.1};	--	GO:0005795,Golgi stack; GO:0005770,late endosome; GO:0000326,protein storage vacuole; GO:0048316,seed development	BURP domain
SMEL_001g117720.1	32.22	55.7	46.82	15.91	13.42	14.57	165	317	235	76	72	69	0.357	-1.485	7.79747e-08	2.79502e-06	down	SMEL3Ch01	2565110	2565424	-	SMEL_001g117720.1.01	--	K02605 origin recognition complex subunit 3 | (RefSeq) hypothetical protein (A)	PREDICTED: putative lipid-transfer protein DIR1 [Solanum pennellii]	RecName: Full=Putative lipid-transfer protein DIR1; AltName: Full=Protein DEFECTIVE IN INDUCED RESISTANCE 1; Flags: Precursor;	SubName: Full=Uncharacterized protein {ECO:0000313|EnsemblPlants:Solyc01g109390.2.1};	--	GO:0048046,apoplast; GO:0005783,endoplasmic reticulum; GO:0009506,plasmodesma; GO:0005504,fatty acid binding; GO:0043621,protein self-association; GO:0008270,zinc ion binding; GO:0006869,lipid transport; GO:0009627,systemic acquired resistance; GO:0009862,systemic acquired resistance, salicylic acid mediated signaling pathway	Probable lipid transfer
SMEL_001g117930.1	57.47	57.27	45.13	135.89	195.38	145.83	938	1039	722	2069	3341	2201	3.307	1.726	2.5056e-19	7.8247e-17	up	SMEL3Ch01	2734297	2736081	-	SMEL_001g117930.1.01	--	K12189 ESCRT-II complex subunit VPS25 | (RefSeq) vacuolar protein sorting-associated protein 25-like isoform X3 (A)	PREDICTED: cold-regulated 413 plasma membrane protein 2 isoform X1 [Capsicum annuum]	RecName: Full=Cold-regulated 413 plasma membrane protein 2; Short=AtCOR413-PM2;	SubName: Full=Cold-regulated plasma membrane protein 2 {ECO:0000313|EMBL:PHT42113.1};	--	GO:0016021,integral component of membrane; GO:0005886,plasma membrane; GO:0005774,vacuolar membrane	Cold acclimation protein WCOR413
SMEL_001g117990.1	90.93	124.73	74.87	126.56	259.05	198.41	513	782	414	666	1531	1035	2.242	1.165	9.93774e-05	0.00129228	up	SMEL3Ch01	2821938	2823383	-	SMEL_001g117990.1.01	--	--	PREDICTED: uncharacterized protein LOC104106916 [Nicotiana tomentosiformis]	--	SubName: Full=Uncharacterized protein {ECO:0000313|EnsemblPlants:Solyc01g109100.2.1};	--	--	--
SMEL_001g118060.1	17.29	14.87	19.21	39.39	36.8	36.23	1087	1039	1184	2310	2424	2106	2.397	1.261	1.52904e-13	1.9746e-11	up	SMEL3Ch01	2881297	2896740	-	SMEL_001g118060.1.01	--	K17925 sorting nexin-13 | (RefSeq) uncharacterized LOC102591656 (A)	PREDICTED: uncharacterized protein LOC102591656 [Solanum tuberosum]	--	SubName: Full=Uncharacterized protein {ECO:0000313|EnsemblPlants:Solyc01g108920.2.1};	Intermediate filament-like protein, sorting nexins, and related proteins containing PX (PhoX) domain(s)	GO:0016021,integral component of membrane; GO:0035091,phosphatidylinositol binding	PXA domain
SMEL_001g118110.1	120.25	105.36	72.89	37.84	29.17	29.92	2821	2747	1676	828	717	649	0.36	-1.475	4.69598e-14	6.58428e-12	down	SMEL3Ch01	2918096	2920214	+	SMEL_001g118110.1.01	--	K05282 gibberellin-44 dioxygenase [EC:1.14.11.12] | (RefSeq) flavanone 3-dioxygenase 2-like (A)	hypothetical protein CQW23_20820 [Capsicum baccatum]	RecName: Full=Protein DMR6-LIKE OXYGENASE 2 {ECO:0000303|PubMed:25376907}; EC=1.14.11.- {ECO:0000255|PROSITE-ProRule:PRU00805}; AltName: Full=2-oxoglutarate (2OG)-Fe(II) oxygenase-like protein DLO2 {ECO:0000303|PubMed:25376907}; AltName: Full=Salicylate 3-hydroxylase DLO2 {ECO:0000305}; Short=S3H DLO2 {ECO:0000305}; Short=SA 3-hydroxylase DLO2 {ECO:0000305}; Short=Salicylic acid 3-hydroxylase DLO…	SubName: Full=Uncharacterized protein {ECO:0000313|EMBL:PHT41966.1};	Iron/ascorbate family oxidoreductases	GO:0051213,dioxygenase activity; GO:0046872,metal ion binding; GO:0002229,defense response to oomycetes; GO:0046244,salicylic acid catabolic process	non-haem dioxygenase in morphine synthesis N-terminal
SMEL_001g118120.1	1707.91	1592.2	1199.07	522.73	361.7	367.32	33570	34781	23100	9584	7448	6676	0.307	-1.703	4.73049e-20	1.68104e-17	down	SMEL3Ch01	2923612	2925023	+	SMEL_001g118120.1.01	--	K06892 feruloyl-CoA ortho-hydroxylase [EC:1.14.11.-] | (RefSeq) feruloyl CoA ortho-hydroxylase 1-like (A)	PREDICTED: 1-aminocyclopropane-1-carboxylate oxidase 5-like [Solanum pennellii]	RecName: Full=Probable 2-oxoglutarate-dependent dioxygenase At5g05600 {ECO:0000305}; EC=1.14.11.- {ECO:0000305};	SubName: Full=Uncharacterized protein {ECO:0000313|EnsemblPlants:PGSC0003DMT400066714};	Iron/ascorbate family oxidoreductases	GO:0005829,cytosol; GO:0051213,dioxygenase activity; GO:0120091,jasmonic acid hydrolase; GO:0046872,metal ion binding; GO:0097237,cellular response to toxic substance; GO:0009813,flavonoid biosynthetic process; GO:2000022,regulation of jasmonic acid mediated signaling pathway; GO:0080167,response to karrikin	non-haem dioxygenase in morphine synthesis N-terminal
SMEL_001g118180.1	57.24	55.24	32.76	23.05	18.82	12.84	993	1065	557	373	342	206	0.417	-1.262	1.64035e-06	4.03452e-05	down	SMEL3Ch01	2969018	2970266	+	SMEL_001g118180.1.01	--	K20802 (R)-mandelonitrile lyase [EC:4.1.2.10] | (RefSeq) alpha-hydroxynitrile lyase (A)	PREDICTED: salicylic acid-binding protein 2-like [Solanum tuberosum]	RecName: Full=Methylesterase 10; Short=AtMES10; EC=3.1.1.-;	SubName: Full=salicylic acid-binding protein 2-like {ECO:0000313|RefSeq:XP_016504460.1};	--	GO:0016788,hydrolase activity, acting on ester bonds; GO:0080032,methyl jasmonate esterase activity	Alpha/beta hydrolase family
SMEL_001g118190.1	4.55	3.57	3.06	1.61	1.38	1.15	94	82	62	31	30	22	0.41	-1.287	4.00937e-05	0.00061343	down	SMEL3Ch01	2971158	2973998	+	SMEL_001g118190.1.01	--	K20802 (R)-mandelonitrile lyase [EC:4.1.2.10] | (RefSeq) alpha-hydroxynitrile lyase (A)	PREDICTED: uncharacterized protein LOC104239099 [Nicotiana sylvestris]	RecName: Full=Salicylic acid-binding protein 2; Short=NtSABP2; EC=3.1.1.-; AltName: Full=Methyl salicylate esterase;	SubName: Full=uncharacterized protein LOC104239099 {ECO:0000313|RefSeq:XP_009791932.1};	--	GO:0016298,lipase activity; GO:0080031,methyl salicylate esterase activity; GO:0009862,systemic acquired resistance, salicylic acid mediated signaling pathway	Serine aminopeptidase, S33
SMEL_001g118230.1	15.35	19.39	23.93	6.91	4.39	6.11	250	351	382	105	75	92	0.323	-1.63	9.84652e-09	4.53006e-07	down	SMEL3Ch01	3034648	3035888	-	SMEL_001g118230.1.01	--	K20802 (R)-mandelonitrile lyase [EC:4.1.2.10] | (RefSeq) hypothetical protein (A)	PREDICTED: polyneuridine-aldehyde esterase-like isoform X1 [Solanum tuberosum]	RecName: Full=Polyneuridine-aldehyde esterase; EC=3.1.1.78; AltName: Full=Polyneuridine aldehyde esterase; Flags: Precursor;	SubName: Full=Uncharacterized protein {ECO:0000313|EnsemblPlants:PGSC0003DMT400066405};	--	GO:0050529,polyneuridine-aldehyde esterase activity; GO:0009820,alkaloid metabolic process	alpha/beta hydrolase fold
SMEL_001g118240.1	1.89	1.87	3.84	1.08	0.96	1.3	289	317	574	154	153	183	0.475	-1.073	0.00252073	0.0170176	down	SMEL3Ch01	3045360	3060845	+	SMEL_001g118240.1.01	--	K10400 kinesin family member 15 | (RefSeq) phragmoplast orienting kinesin 2 (A)	PREDICTED: phragmoplast orienting kinesin 2 isoform X2 [Solanum tuberosum]	RecName: Full=Kinesin-like protein KIN-12D {ECO:0000305}; AltName: Full=Phragmoplast orienting kinesin 2 {ECO:0000303|PubMed:16682350};	SubName: Full=Uncharacterized protein {ECO:0000313|EnsemblPlants:Solyc01g108670.2.1};	Kinesin-like protein	GO:0005871,kinesin complex; GO:0005874,microtubule; GO:0009524,phragmoplast; GO:0005524,ATP binding; GO:0016887,ATPase activity; GO:0008017,microtubule binding; GO:0003777,microtubule motor activity; GO:0000911,cytokinesis by cell plate formation; GO:0007018,microtubule-based movement; GO:0000281,mitotic cytokinesis	Kinesin motor domain
SMEL_001g118500.1	3.02	3.5	3.56	7.72	8.45	8.52	84	108	97	200	246	219	2.697	1.432	3.26298e-12	3.24895e-10	up	SMEL3Ch01	3241180	3251919	-	SMEL_001g118500.1.01	--	--	PREDICTED: uncharacterized protein LOC107879517 [Capsicum annuum]	--	SubName: Full=uncharacterized protein LOC107879517 {ECO:0000313|RefSeq:XP_016582034.1};	--	GO:0016021,integral component of membrane; GO:0009055,electron transfer activity	Plastocyanin-like domain
SMEL_001g118700.1	6.05	6.87	5.19	0.75	1.17	2.37	69	87	58	8	14	25	0.263	-1.925	1.58293e-05	0.00028569	down	SMEL3Ch01	3431396	3432465	+	SMEL_001g118700.1.01	--	--	PREDICTED: uncharacterized protein LOC102595426 [Solanum tuberosum]	--	SubName: Full=Uncharacterized protein {ECO:0000313|EnsemblPlants:PGSC0003DMT400066608};	--	--	--
SMEL_001g118760.1	8.75	12.64	10.34	24.45	33.64	23.42	38	61	44	99	153	94	2.831	1.501	2.52611e-07	7.80962e-06	up	SMEL3Ch01	3525897	3526163	-	SMEL_001g118760.1.01	--	--	--	--	--	--	--	--
SMEL_001g118980.1	28.28	28.6	24.25	11.63	9.63	7.81	1379	1550	1159	529	492	352	0.394	-1.343	4.25239e-16	7.89603e-14	down	SMEL3Ch01	3751269	3758264	-	SMEL_001g118980.1.01	--	K10352 myosin heavy chain | (RefSeq) filament-like plant protein 7 (A)	PREDICTED: filament-like plant protein 7 [Solanum pennellii]	RecName: Full=Filament-like plant protein 7; Short=AtFPP7;	SubName: Full=Uncharacterized protein {ECO:0000313|EMBL:PHU10437.1};	--	--	Filament-like plant protein, long coiled-coil
SMEL_001g119010.1	21.09	20.22	48.29	66.84	93.95	82.91	476	507	1068	1407	2221	1730	2.937	1.554	3.41486e-05	0.000538926	up	SMEL3Ch01	3785935	3798138	+	SMEL_001g119010.1.01	--	K14595 abscisate beta-glucosyltransferase [EC:2.4.1.263] | (RefSeq) UDP-glucosyltransferase 73B2 (A)	PREDICTED: CBS domain-containing protein CBSX1, chloroplastic-like [Solanum tuberosum]	RecName: Full=CBS domain-containing protein CBSX2, chloroplastic; AltName: Full=CBS domain-containing protein 1; Short=AtCDCP1; AltName: Full=Protein LOSS OF THE TIMING OF ET AND JA BIOSYNTHESIS 1; Short=AtLEJ1; Flags: Precursor;	SubName: Full=Putative CBS domain-containing protein CBSX1, chloroplastic-like {ECO:0000313|EMBL:JAP25338.1};	--	GO:0009507,chloroplast; GO:0009570,chloroplast stroma; GO:0045454,cell redox homeostasis	CBS domain
SMEL_001g119440.1	4.43	3.16	3.2	0.99	0.53	0.8	24	19	17	5	3	4	0.235	-2.088	0.0013233	0.0103234	down	SMEL3Ch01	4174030	4174569	-	SMEL_001g119440.1.01	--	K03860 phosphatidylinositol glycan, class Q | (RefSeq) N-acetylglucosaminyl-phosphatidylinositol biosynthetic protein gpi1-like (A)	Gibberellin-regulated protein 8 [Capsicum baccatum]	RecName: Full=Snakin-1; Flags: Precursor;	SubName: Full=Gibberellin-regulated protein 8 {ECO:0000313|EMBL:PHT41735.1};	--	GO:0005618,cell wall; GO:0005576,extracellular region; GO:0006952,defense response	Gibberellin regulated protein
SMEL_001g119550.1	4.99	6.34	6.84	14.06	15.69	15.51	102	144	137	268	336	293	2.737	1.453	2.2345e-11	1.83487e-09	up	SMEL3Ch01	4261406	4268095	+	SMEL_001g119550.1.01	--	K13348 protein Mpv17 | (RefSeq) PXMP2/4 family protein 4 (A)	PREDICTED: PXMP2/4 family protein 4 [Solanum lycopersicum]	RecName: Full=Peroxisomal membrane protein PMP22; AltName: Full=22 kDa peroxisomal membrane protein;	SubName: Full=Uncharacterized protein {ECO:0000313|EnsemblPlants:PGSC0003DMT400066516};	Peroxisomal membrane protein MPV17 and related proteins	GO:0005779,integral component of peroxisomal membrane	Mpv17 / PMP22 family
SMEL_001g119680.1	8.63	10.36	10.64	11.57	27.81	21.59	48	64	58	60	162	111	2.277	1.187	0.00165099	0.0122361	up	SMEL3Ch01	4425490	4425831	+	SMEL_001g119680.1.01	--	K15920 xylan 1,4-beta-xylosidase [EC:3.2.1.37] | (RefSeq) probable beta-D-xylosidase 5 isoform X2 (A)	PREDICTED: uncharacterized protein LOC102586586 [Solanum tuberosum]	--	SubName: Full=Uncharacterized protein {ECO:0000313|EnsemblPlants:Solyc01g107090.2.1};	--	--	--
SMEL_001g119830.1	0.48	0.8	1.26	0.15	0.07	0.22	7	13	18	2	1	3	0.184	-2.444	0.00851184	0.0432431	down	SMEL3Ch01	4806232	4808285	-	SMEL_001g119830.1.01	--	K13449 pathogenesis-related protein 1 | (RefSeq) PR1; basic form of pathogenesis-related protein 1-like (A)	hypothetical protein JCGZ_09851 [Jatropha curcas]	RecName: Full=Basic form of pathogenesis-related protein 1; Short=PRP 1; Flags: Precursor;	SubName: Full=Uncharacterized protein {ECO:0000313|EMBL:CCB49610.1};	Defense-related protein containing SCP domain	GO:0005576,extracellular region; GO:0006952,defense response; GO:0009607,response to biotic stimulus	Cysteine-rich secretory protein family
SMEL_001g119880.1	14.33	28.41	74.05	6.31	4.94	8.29	202	445	1023	83	73	108	0.179	-2.484	3.68952e-06	8.23885e-05	down	SMEL3Ch01	4828452	4831191	-	SMEL_001g119880.1.01	--	K13449 pathogenesis-related protein 1 | (RefSeq) pathogenesis-related protein 1A1 (A)	PR-1, partial [Solanum torvum]	RecName: Full=Pathogenesis-related protein 1A1; Short=PR-1A1; Flags: Precursor;	SubName: Full=PR-1 {ECO:0000313|EMBL:BAB78476.1}; Flags: Fragment;	Defense-related protein containing SCP domain	GO:0005576,extracellular region; GO:0006952,defense response; GO:0009607,response to biotic stimulus	Cysteine-rich secretory protein family
SMEL_001g119900.1	15.75	12.74	11.1	2.55	2.05	4.29	139	125	96	21	19	35	0.248	-2.01	7.41442e-09	3.55392e-07	down	SMEL3Ch01	4836161	4836703	-	SMEL_001g119900.1.01	--	K13449 pathogenesis-related protein 1 | (RefSeq) pathogenesis-related protein 1A-like (A)	PREDICTED: pathogenesis-related protein 1A-like [Capsicum annuum]	RecName: Full=Pathogenesis-related protein 1B; Short=PR-1B; Flags: Precursor;	SubName: Full=Pathogenesis-related protein 1C {ECO:0000313|EMBL:PHT26474.1};	Defense-related protein containing SCP domain	GO:0005576,extracellular region; GO:0005773,vacuole; GO:0006952,defense response; GO:0009607,response to biotic stimulus	Cysteine-rich secretory protein family
SMEL_001g119960.1	1.31	1.43	2.12	0.6	0.64	0.69	51	62	81	22	26	25	0.435	-1.2	0.00151447	0.0114803	down	SMEL3Ch01	4873123	4877009	+	SMEL_001g119960.1.01	--	K09566 peptidyl-prolyl isomerase G (cyclophilin G) [EC:5.2.1.8] | (RefSeq) uncharacterized protein LOC103967054 (A)	PREDICTED: uncharacterized protein LOC102586934 [Solanum tuberosum]	--	SubName: Full=Uncharacterized protein {ECO:0000313|EnsemblPlants:PGSC0003DMT400013115};	--	--	--
SMEL_001g120030.1	2.89	2.44	1.49	5.44	8.49	10.82	81	76	41	142	249	280	4.057	2.021	4.63101e-09	2.32804e-07	up	SMEL3Ch01	4908937	4911833	-	SMEL_001g120030.1.01	--	K14963 COMPASS component SWD3 | (RefSeq) transcription factor bHLH18-like (A)	PREDICTED: transcription factor bHLH18-like [Solanum tuberosum]	RecName: Full=Transcription factor bHLH25; AltName: Full=Basic helix-loop-helix protein 25; Short=AtbHLH25; Short=bHLH 25; AltName: Full=Transcription factor EN 29; AltName: Full=bHLH transcription factor bHLH025;	SubName: Full=Uncharacterized protein {ECO:0000313|EnsemblPlants:PGSC0003DMT400013074};	--	GO:0005634,nucleus; GO:0003677,DNA binding; GO:0003700,DNA-binding transcription factor activity; GO:0046983,protein dimerization activity; GO:0006355,regulation of transcription, DNA-templated; GO:0006351,transcription, DNA-templated	Helix-loop-helix DNA-binding domain
SMEL_001g120300.1	0.58	0.79	1.34	2.49	3.61	5.35	4	6	9	16	26	34	4.677	2.226	0.000312148	0.00323952	up	SMEL3Ch01	5130588	5131326	-	SMEL_001g120300.1.01	--	K09264 MADS-box transcription factor, plant | (RefSeq) MADS-box transcription factor 23-like (A)	MADS-box transcription factor 27 [Capsicum annuum]	RecName: Full=MADS-box transcription factor 27; AltName: Full=OsMADS27; AltName: Full=RMADS218;	SubName: Full=MADS-box transcription factor 27 {ECO:0000313|EMBL:PHT64230.1};	MADS box transcription factor	GO:0005634,nucleus; GO:0003700,DNA-binding transcription factor activity; GO:0046983,protein dimerization activity; GO:0000977,RNA polymerase II regulatory region sequence-specific DNA binding; GO:0045944,positive regulation of transcription by RNA polymerase II; GO:0006351,transcription, DNA-templated	K-box region
SMEL_001g120320.1	1.32	1.37	0.29	0.25	0.05	0.03	46	53	10	8	2	1	0.123	-3.026	0.000351803	0.0035579	down	SMEL3Ch01	5158991	5161138	+	SMEL_001g120320.1.01	--	K04733 interleukin-1 receptor-associated kinase 4 [EC:2.7.11.1] | (RefSeq) L-type lectin-domain containing receptor kinase IX.1-like (A)	PREDICTED: L-type lectin-domain containing receptor kinase IX.1-like [Capsicum annuum]	RecName: Full=L-type lectin-domain containing receptor kinase IX.1 {ECO:0000303|PubMed:19773388}; Short=LecRK-IX.1 {ECO:0000303|PubMed:19773388}; EC=2.7.11.1 {ECO:0000255|PROSITE-ProRule:PRU00159}; Flags: Precursor;	SubName: Full=L-type lectin-domain containing receptor kinase IX.1-like {ECO:0000313|RefSeq:XP_016582328.1};	--	GO:0016021,integral component of membrane; GO:0005886,plasma membrane; GO:0005524,ATP binding; GO:0030246,carbohydrate binding; GO:0004674,protein serine/threonine kinase activity; GO:0002229,defense response to oomycetes; GO:0010942,positive regulation of cell death; GO:0010726,positive regulation of hydrogen peroxide metabolic process	Legume lectin domain
SMEL_001g120410.1	36.91	43.04	94.95	104.15	113.58	154.58	669	867	1687	1761	2157	2591	2.301	1.202	0.00194301	0.0139538	up	SMEL3Ch01	5238041	5241877	+	SMEL_001g120410.1.01	--	K22314 glucosinolate gamma-glutamyl hydrolase [EC:3.4.19.16] | (RefSeq) putative glutamine amidotransferase YLR126C (A)	PREDICTED: putative glutamine amidotransferase YLR126C [Solanum tuberosum]	RecName: Full=Gamma-glutamyl peptidase 5 {ECO:0000305}; EC=3.4.19.- {ECO:0000305};	SubName: Full=Uncharacterized protein {ECO:0000313|EnsemblPlants:PGSC0003DMT400027692};	Predicted glutamine synthetase	GO:0005829,cytosol; GO:0008233,peptidase activity	Glutamine amidotransferase class-I
SMEL_001g120420.1	24.56	24.01	26.48	47.28	57.89	56.97	1315	1429	1390	2362	3248	2821	2.379	1.25	2.1628e-13	2.65342e-11	up	SMEL3Ch01	5251874	5265884	+	SMEL_001g120420.1.01	--	K17065 dynamin 1-like protein [EC:3.6.5.5] | (RefSeq) dynamin-related protein 3B-like (A)	PREDICTED: dynamin-related protein 3B-like [Solanum tuberosum]	RecName: Full=Dynamin-related protein 3A; AltName: Full=Dynamin-like protein 2; AltName: Full=Dynamin-like protein 2a;	SubName: Full=Dynamin-related protein 3B {ECO:0000313|EMBL:PHT64276.1};	Vacuolar sorting protein VPS1, dynamin, and related proteins	GO:0005739,mitochondrion; GO:0005777,peroxisome; GO:0005525,GTP binding; GO:0003924,GTPase activity; GO:0042802,identical protein binding; GO:0008017,microtubule binding; GO:0007049,cell cycle; GO:0051301,cell division; GO:0007031,peroxisome organization	Dynamin central region
SMEL_001g120560.1	0.35	1.04	1.3	0.25	0.11	0.19	6	20	22	4	2	3	0.219	-2.194	0.00976653	0.0477749	down	SMEL3Ch01	5520092	5521980	+	SMEL_001g120560.1.01	--	K05894 12-oxophytodienoic acid reductase [EC:1.3.1.42] | (RefSeq) 12-oxophytodienoate reductase-like protein (A)	12-oxophytodienoate reductase 2 [Capsicum chinense]	RecName: Full=12-oxophytodienoate reductase-like protein; EC=1.3.1.-; AltName: Full=LeOPR2;	SubName: Full=12-oxophytodienoate reductase 2 {ECO:0000313|EMBL:PHU16676.1};	NADH:flavin oxidoreductase/12-oxophytodienoate reductase	GO:0005737,cytoplasm; GO:0005622,intracellular; GO:0010181,FMN binding; GO:0016491,oxidoreductase activity; GO:0055114,oxidation-reduction process	NADH:flavin oxidoreductase / NADH oxidase family
SMEL_001g120600.1	2.67	2.15	1.02	0.92	0.5	0.62	56	50	21	18	11	12	0.387	-1.369	0.00567728	0.0319132	down	SMEL3Ch01	5553936	5555225	-	SMEL_001g120600.1.01	--	K01426 amidase [EC:3.5.1.4] | (RefSeq) amidase 1 (A)	Amidase 1 [Capsicum chinense]	RecName: Full=Amidase 1 {ECO:0000303|PubMed:16738862}; Short=AtAMI1 {ECO:0000303|PubMed:12620340}; EC=3.5.1.4 {ECO:0000269|PubMed:12620340, ECO:0000269|PubMed:17555521, ECO:0000269|PubMed:27135507}; AltName: Full=Translocon at the outer membrane of chloroplasts 64-I {ECO:0000305}; Short=AtTOC64-I {ECO:0000303|PubMed:14741350};	SubName: Full=Amidase 1 {ECO:0000313|EMBL:PHU04931.1};	Amidases	GO:0005737,cytoplasm; GO:0005829,cytosol; GO:0005654,nucleoplasm; GO:0004040,amidase activity; GO:0016810,hydrolase activity, acting on carbon-nitrogen (but not peptide) bonds; GO:0043864,indoleacetamide hydrolase activity; GO:0009851,auxin biosynthetic process; GO:0009684,indoleacetic acid biosynthetic process	Amidase
SMEL_001g120900.1	4.8	7.66	10.05	13.78	11.71	17.28	115	204	236	308	294	383	2.073	1.052	0.00127162	0.00996666	up	SMEL3Ch01	5954031	5958401	-	SMEL_001g120900.1.01	--	K17964 leucine-rich PPR motif-containing protein, mitochondrial | (RefSeq) putative pentatricopeptide repeat-containing protein At1g19290 (A)	PREDICTED: protein DA1-related 1-like [Solanum pennellii]	RecName: Full=Protein DA1; AltName: Full=Protein SUPPRESSOR OF LARGE SEED AND ORGAN PHENOTYPES OF DA1-1 1;	SubName: Full=protein DA1-related 1-like isoform X2 {ECO:0000313|RefSeq:XP_016539236.1};	Adaptor protein Enigma and related PDZ-LIM proteins	GO:0046872,metal ion binding; GO:0008233,peptidase activity; GO:0043130,ubiquitin binding; GO:0008285,negative regulation of cell proliferation; GO:0046621,negative regulation of organ growth; GO:0048482,plant ovule morphogenesis; GO:1900057,positive regulation of leaf senescence; GO:0048317,seed morphogenesis	Protein DA1
SMEL_001g121000.1	1.66	2.81	0.57	0.27	0.3	0.07	53	100	18	8	10	2	0.141	-2.822	4.65551e-05	0.000693815	down	SMEL3Ch01	6057162	6059443	-	SMEL_001g121000.1.01	--	K04733 interleukin-1 receptor-associated kinase 4 [EC:2.7.11.1] | (RefSeq) probable inactive receptor kinase At2g26730 (A)	PREDICTED: probable leucine-rich repeat receptor-like protein kinase At1g68400 [Solanum tuberosum]	RecName: Full=Probable inactive receptor kinase At2g26730; Flags: Precursor;	SubName: Full=Uncharacterized protein {ECO:0000313|EnsemblPlants:PGSC0003DMT400032784};	--	GO:0016021,integral component of membrane; GO:0005886,plasma membrane; GO:0005524,ATP binding; GO:0004672,protein kinase activity	Protein kinase domain
SMEL_001g121010.1	21.5	32	68.64	111.92	92.54	141.62	179	296	560	869	807	1090	3.052	1.61	0.000129643	0.00161163	up	SMEL3Ch01	6060924	6062490	-	SMEL_001g121010.1.01	--	K00430 peroxidase [EC:1.11.1.7] | (RefSeq) CEVI16; peroxidase N1 (A)	PREDICTED: peroxidase N1 [Solanum tuberosum]	RecName: Full=Peroxidase N1; EC=1.11.1.7; AltName: Full=Peroxidase B2; AltName: Full=Peroxidase B3; Flags: Precursor;	RecName: Full=Peroxidase {ECO:0000256|RuleBase:RU362060, ECO:0000256|SAAS:SAAS00709852}; EC=1.11.1.7 {ECO:0000256|RuleBase:RU362060, ECO:0000256|SAAS:SAAS00709852};	--	GO:0005576,extracellular region; GO:0020037,heme binding; GO:0046872,metal ion binding; GO:0004601,peroxidase activity; GO:0042744,hydrogen peroxide catabolic process; GO:0006979,response to oxidative stress	Peroxidase
SMEL_001g121250.1	2.47	4.27	3.1	0.71	0.45	1.33	26	50	32	7	5	13	0.278	-1.845	0.000815717	0.00691922	down	SMEL3Ch01	6297256	6297903	-	SMEL_001g121250.1.01	--	K22736 vacuolar iron transporter family protein | (RefSeq) vacuolar iron transporter homolog 4-like (A)	PREDICTED: vacuolar iron transporter homolog 4-like [Solanum pennellii]	RecName: Full=Vacuolar iron transporter homolog 4; AltName: Full=Protein NODULIN-LIKE 4;	SubName: Full=Uncharacterized protein {ECO:0000313|EnsemblPlants:PGSC0003DMT400076565};	Uncharacterized membrane protein	GO:0016021,integral component of membrane; GO:0016020,membrane; GO:0005774,vacuolar membrane; GO:0005381,iron ion transmembrane transporter activity; GO:0005384,manganese ion transmembrane transporter activity; GO:0030026,cellular manganese ion homeostasis; GO:0071281,cellular response to iron ion; GO:0006880,intracellular sequestering of iron ion; GO:0071421,manganese ion transmembrane transport	VIT family
SMEL_001g121280.1	2.84	1.94	2.4	4	5.24	4.56	29	22	24	38	56	43	2.128	1.089	0.00237339	0.0162356	up	SMEL3Ch01	6316371	6316997	+	SMEL_001g121280.1.01	--	K22736 vacuolar iron transporter family protein | (RefSeq) vacuolar iron transporter homolog 4-like (A)	PREDICTED: vacuolar iron transporter homolog 4-like [Solanum tuberosum]	RecName: Full=Vacuolar iron transporter homolog 4; AltName: Full=Protein NODULIN-LIKE 4;	SubName: Full=Uncharacterized protein {ECO:0000313|EnsemblPlants:PGSC0003DMT400076498};	Uncharacterized membrane protein	GO:0016021,integral component of membrane; GO:0016020,membrane; GO:0005774,vacuolar membrane; GO:0005381,iron ion transmembrane transporter activity; GO:0005384,manganese ion transmembrane transporter activity; GO:0030026,cellular manganese ion homeostasis; GO:0071281,cellular response to iron ion; GO:0006880,intracellular sequestering of iron ion; GO:0071421,manganese ion transmembrane transport	VIT family
SMEL_001g121340.1	0.8	0.72	0.41	3.28	2.54	1.87	6	6	3	23	20	13	4.398	2.137	0.000626545	0.00564164	up	SMEL3Ch01	6356202	6357049	+	SMEL_001g121340.1.01	--	--	PREDICTED: uncharacterized protein LOC107027143 [Solanum pennellii]	--	SubName: Full=Putative ovule protein {ECO:0000313|EMBL:JAP06724.1};	--	--	--
SMEL_001g121520.1	15.93	6.3	4.35	33.67	52.05	17.26	564	248	151	1112	1931	565	4.328	2.114	1.03001e-05	0.000199339	up	SMEL3Ch01	6613100	6615277	+	SMEL_001g121520.1.01	--	--	PREDICTED: fibronectin-binding protein A-like [Solanum tuberosum]	RecName: Full=Protein PELPK2 {ECO:0000305}; AltName: Full=Protein Pro-Glu-Leu|Ile|Val-Pro-Lys 2 {ECO:0000303|PubMed:21559969}; Flags: Precursor;	SubName: Full=S-antigen protein {ECO:0000313|EMBL:OLP97149.1};	--	GO:0005618,cell wall; GO:0005576,extracellular region; GO:0007275,multicellular organism development	Cornifin (SPRR) family
SMEL_001g121530.1	4.25	1.62	0.58	6.08	9.83	3.07	45	19	6	60	109	30	3.311	1.727	0.00823827	0.0421861	up	SMEL3Ch01	6617369	6618078	+	SMEL_001g121530.1.01	--	--	--	--	--	--	--	--
SMEL_001g121540.1	1.74	1.23	0.69	8.03	9.75	2.62	23	18	9	99	135	32	6.167	2.625	9.97179e-07	2.62154e-05	up	SMEL3Ch01	6620179	6620991	+	SMEL_001g121540.1.01	--	--	PREDICTED: proteoglycan 4-like isoform X4 [Solanum pennellii]	--	SubName: Full=Uncharacterized protein {ECO:0000313|EMBL:PHT29991.1};	--	--	--
SMEL_001g121550.1	0.38	0.68	0.31	3.97	6.14	1.15	5	10	4	49	85	14	9.032	3.175	4.08787e-06	9.0016e-05	up	SMEL3Ch01	6622226	6623038	+	SMEL_001g121550.1.01	--	--	PREDICTED: proteoglycan 4-like isoform X4 [Solanum pennellii]	--	SubName: Full=Uncharacterized protein {ECO:0000313|EMBL:PHT29991.1};	--	--	--
SMEL_001g121560.1	58.46	23.8	20.09	146.06	174.36	68.93	787	356	265	1834	2459	858	4.227	2.08	1.03295e-06	2.70729e-05	up	SMEL3Ch01	6630859	6631686	+	SMEL_001g121560.1.01	--	--	PREDICTED: vegetative cell wall protein gp1-like [Nicotiana tabacum]	--	SubName: Full=vegetative cell wall protein gp1-like {ECO:0000313|RefSeq:XP_016462234.1};	--	--	--
SMEL_001g121640.1	0.22	0.5	0.11	1.32	2.62	4.91	4	10	2	22	49	81	11.697	3.548	3.49301e-07	1.04491e-05	up	SMEL3Ch01	6671990	6674777	-	SMEL_001g121640.1.01	--	K14976 thebaine 6-O-demethylase [EC:1.14.11.31] | (RefSeq) thebaine 6-O-demethylase (A)	hypothetical protein BC332_32420 [Capsicum chinense]	RecName: Full=Protein DMR6-LIKE OXYGENASE 2 {ECO:0000303|PubMed:25376907}; EC=1.14.11.- {ECO:0000255|PROSITE-ProRule:PRU00805}; AltName: Full=2-oxoglutarate (2OG)-Fe(II) oxygenase-like protein DLO2 {ECO:0000303|PubMed:25376907}; AltName: Full=Salicylate 3-hydroxylase DLO2 {ECO:0000305}; Short=S3H DLO2 {ECO:0000305}; Short=SA 3-hydroxylase DLO2 {ECO:0000305}; Short=Salicylic acid 3-hydroxylase DLO…	SubName: Full=Uncharacterized protein {ECO:0000313|EMBL:PHT98629.1};	Iron/ascorbate family oxidoreductases	GO:0051213,dioxygenase activity; GO:0046872,metal ion binding; GO:0002229,defense response to oomycetes; GO:0046244,salicylic acid catabolic process	2OG-Fe(II) oxygenase superfamily
SMEL_001g121720.1	1.95	2.66	3.83	1.39	0.21	0.55	27	41	52	18	3	7	0.271	-1.881	0.00390969	0.0239371	down	SMEL3Ch01	6711720	6712737	+	SMEL_001g121720.1.01	--	K13065 shikimate O-hydroxycinnamoyltransferase [EC:2.3.1.133] | (RefSeq) acetyl-CoA-benzylalcohol acetyltransferase-like (A)	PREDICTED: acetyl-CoA-benzylalcohol acetyltransferase-like [Capsicum annuum]	RecName: Full=Vinorine synthase; EC=2.3.1.160;	SubName: Full=acetyl-CoA-benzylalcohol acetyltransferase-like {ECO:0000313|RefSeq:XP_016581959.1};	--	GO:0050636,vinorine synthase activity; GO:0009820,alkaloid metabolic process	Transferase family
SMEL_001g122270.1	4.24	6.49	1.44	1.52	0.94	0.31	30	51	10	10	7	2	0.253	-1.984	0.00688997	0.0370008	down	SMEL3Ch01	7540653	7541087	+	SMEL_001g122270.1.01	--	K02639 ferredoxin | (RefSeq) ferredoxin (A)	ferredoxin [Nicotiana benthamiana]	RecName: Full=Ferredoxin, chloroplastic; AltName: Full=PFLP; Flags: Precursor;	RecName: Full=Ferredoxin {ECO:0000256|RuleBase:RU364001};	--	GO:0009507,chloroplast; GO:0051537,2 iron, 2 sulfur cluster binding; GO:0009055,electron transfer activity; GO:0046872,metal ion binding	2Fe-2S iron-sulfur cluster binding domain
SMEL_001g122520.1	78.39	105.11	217.61	278.37	232.78	312.15	2238	3335	6089	7413	6962	8240	2.211	1.144	0.00253198	0.0170767	up	SMEL3Ch01	7764903	7771296	-	SMEL_001g122520.1.01	--	K13696 abhydrolase domain-containing protein 1/3 | (RefSeq) embryogenesis-associated protein EMB8-like (A)	PREDICTED: embryogenesis-associated protein EMB8-like isoform X1 [Solanum tuberosum]	RecName: Full=Embryogenesis-associated protein EMB8; EC=3.1.1.-;	SubName: Full=Uncharacterized protein {ECO:0000313|EnsemblPlants:Solyc01g103650.2.1};	Alpha/beta hydrolase	GO:0052689,carboxylic ester hydrolase activity	Serine aminopeptidase, S33
SMEL_001g122570.1	21.71	22.88	56.55	69.75	86.7	92.01	257	301	656	770	1075	1007	2.649	1.405	0.000403783	0.00397282	up	SMEL3Ch01	7788620	7789968	+	SMEL_001g122570.1.01	--	K14611 solute carrier family 23 (nucleobase transporter), member 1/2 | (RefSeq) nucleobase-ascorbate transporter 3-like (A)	hypothetical protein CQW23_20428 [Capsicum baccatum]	--	SubName: Full=Uncharacterized protein {ECO:0000313|EMBL:PHT41574.1};	--	--	Glyoxalase/Bleomycin resistance protein/Dioxygenase superfamily
SMEL_001g123080.1	7.69	7.04	2.3	12.22	26.07	13.91	58	59	17	86	206	97	3.445	1.785	0.000113517	0.00144159	up	SMEL3Ch01	8319391	8319941	-	SMEL_001g123080.1.01	--	--	PREDICTED: lipid transfer-like protein VAS [Solanum tuberosum]	RecName: Full=Lipid transfer-like protein VAS; Flags: Precursor;	SubName: Full=Uncharacterized protein {ECO:0000313|EnsemblPlants:Solyc01g103060.2.1};	--	GO:0031225,anchored component of membrane; GO:0008289,lipid binding	Probable lipid transfer
SMEL_001g123170.1	31.8	73.14	27.11	1.68	5.59	3.28	304	777	254	15	56	29	0.09	-3.474	3.36711e-13	3.96569e-11	down	SMEL3Ch01	8482142	8482729	-	SMEL_001g123170.1.01	--	K13993 HSP20 family protein | (RefSeq) HSP22.7; 22.7 kDa class IV heat shock protein-like (A)	PREDICTED: 22.7 kDa class IV heat shock protein-like [Solanum tuberosum]	RecName: Full=22.7 kDa class IV heat shock protein; Flags: Precursor;	SubName: Full=Uncharacterized protein {ECO:0000313|EnsemblPlants:PGSC0003DMT400053402};	Molecular chaperone (small heat-shock protein Hsp26/Hsp42)	GO:0005788,endoplasmic reticulum lumen	Hsp20/alpha crystallin family
SMEL_001g123240.1	0	0.87	1.48	2.07	3.91	6	0	4	6	8	17	23	5.59	2.483	0.00649684	0.0354249	up	SMEL3Ch01	8539462	8539716	-	SMEL_001g123240.1.01	--	K00384 thioredoxin reductase (NADPH) [EC:1.8.1.9] | (RefSeq) thioredoxin reductase 1-like (A)	PREDICTED: germin-like protein subfamily 1 member 13 [Solanum tuberosum]	RecName: Full=Germin-like protein subfamily 1 member 7; Flags: Precursor;	SubName: Full=germin-like protein subfamily 1 member 14 {ECO:0000313|RefSeq:XP_016514739.1};	--	GO:0048046,apoplast; GO:0005618,cell wall; GO:0030145,manganese ion binding; GO:0045735,nutrient reservoir activity	Cupin
SMEL_001g123260.1	3.85	4.66	1.62	0.92	0.82	0.79	58	78	24	13	13	11	0.279	-1.84	0.000176894	0.00206687	down	SMEL3Ch01	8577539	8578563	-	SMEL_001g123260.1.01	--	K00384 thioredoxin reductase (NADPH) [EC:1.8.1.9] | (RefSeq) thioredoxin reductase 1-like (A)	PREDICTED: putative germin-like protein 2-1 [Nicotiana tabacum]	RecName: Full=Germin-like protein subfamily 1 member 13; Flags: Precursor;	SubName: Full=putative germin-like protein 2-1 {ECO:0000313|RefSeq:XP_016485411.1};	--	GO:0048046,apoplast; GO:0005618,cell wall; GO:0030145,manganese ion binding; GO:0045735,nutrient reservoir activity	Cupin
SMEL_001g123270.1	75.08	65.69	80.69	30.96	30.47	38.64	1162	1130	1224	447	494	553	0.497	-1.009	3.26449e-07	9.85131e-06	down	SMEL3Ch01	8592859	8593907	+	SMEL_001g123270.1.01	--	K00384 thioredoxin reductase (NADPH) [EC:1.8.1.9] | (RefSeq) thioredoxin reductase 1-like (A)	PREDICTED: germin-like protein subfamily 1 member 13 [Solanum tuberosum]	RecName: Full=Germin-like protein subfamily 1 member 18; AltName: Full=GLP2a copy 1; Flags: Precursor;	SubName: Full=germin-like protein subfamily 1 member 20 {ECO:0000313|RefSeq:XP_009784933.1};	--	GO:0048046,apoplast; GO:0005618,cell wall; GO:0030145,manganese ion binding; GO:0045735,nutrient reservoir activity	Cupin
SMEL_001g123590.1	0.78	0.81	0.87	0.36	0.26	0.22	35	40	38	15	12	9	0.372	-1.427	0.000922794	0.00768783	down	SMEL3Ch01	8979005	8983362	+	SMEL_001g123590.1.01	--	K00521 ferric-chelate reductase [EC:1.16.1.7] | (RefSeq) ferric reduction oxidase 6-like (A)	PREDICTED: ferric reduction oxidase 6-like [Solanum tuberosum]	RecName: Full=Ferric reduction oxidase 6; Short=AtFRO6; EC=1.16.1.7; AltName: Full=Ferric-chelate reductase 6;	SubName: Full=Uncharacterized protein {ECO:0000313|EnsemblPlants:PGSC0003DMT400046925};	Ferric reductase, NADH/NADPH oxidase and related proteins	GO:0016021,integral component of membrane; GO:0005886,plasma membrane; GO:0000293,ferric-chelate reductase activity; GO:0046872,metal ion binding; GO:0006811,ion transport; GO:0009416,response to light stimulus	Ferric reductase NAD binding domain
SMEL_001g123620.1	151.55	134.63	197.77	285.43	331.96	351.33	6231	6152	7970	10947	14299	13357	2.191	1.131	5.16819e-07	1.4819e-05	up	SMEL3Ch01	8999555	9003458	+	SMEL_001g123620.1.01	--	K01179 endoglucanase [EC:3.2.1.4] | (RefSeq) endoglucanase 25 (A)	PREDICTED: endoglucanase 25 [Solanum pennellii]	RecName: Full=Endoglucanase 25; EC=3.2.1.4; AltName: Full=Cellulase homolog OR16pep; AltName: Full=Endo-1,4-beta glucanase 25; AltName: Full=Protein KORRIGAN; AltName: Full=Protein RADIALLY SWOLLEN 2;	RecName: Full=Endoglucanase {ECO:0000256|RuleBase:RU361166}; EC=3.2.1.4 {ECO:0000256|RuleBase:RU361166};	--	GO:0009504,cell plate; GO:0005769,early endosome; GO:0005768,endosome; GO:0005794,Golgi apparatus; GO:0016021,integral component of membrane; GO:0005886,plasma membrane; GO:0005802,trans-Golgi network; GO:0008810,cellulase activity; GO:0071555,cell wall organization; GO:0030244,cellulose biosynthetic process; GO:0030245,cellulose catabolic process; GO:0043622,cortical microtubule organization; GO…	Glycosyl hydrolase family 9
SMEL_001g123870.1	519.9	717.13	532.35	882.25	1370.99	1150.43	4167	6388	4182	6596	11512	8526	2.132	1.092	1.07546e-06	2.78822e-05	up	SMEL3Ch01	9271681	9272641	+	SMEL_001g123870.1.01	--	K03260 translation initiation factor 4G | (RefSeq) eukaryotic translation initiation factor-like (A)	Hydrophobic protein LTI6B [Capsicum chinense]	RecName: Full=Hydrophobic protein LTI6A; AltName: Full=Low temperature-induced protein 6A;	SubName: Full=Hydrophobic protein LTI6B {ECO:0000313|EMBL:PHU10211.1};	Stress responsive protein	GO:0016021,integral component of membrane; GO:0005886,plasma membrane; GO:0009737,response to abscisic acid; GO:0009409,response to cold; GO:0009651,response to salt stress; GO:0009414,response to water deprivation	Proteolipid membrane potential modulator
SMEL_001g123920.1	2.9	3.54	3.22	1.37	1.3	1.02	34	46	37	15	16	11	0.421	-1.249	0.00210085	0.0148188	down	SMEL3Ch01	9525890	9526609	-	SMEL_001g123920.1.01	--	K04454 MADS-box transcription enhancer factor 2C | (RefSeq) agamous-like MADS-box protein AGL80 (A)	PREDICTED: agamous-like MADS-box protein AGL80 [Solanum tuberosum]	RecName: Full=Agamous-like MADS-box protein AGL80;	SubName: Full=Uncharacterized protein {ECO:0000313|EnsemblPlants:Solyc01g102260.2.1};	MADS box transcription factor	GO:0005634,nucleus; GO:0043078,polar nucleus; GO:0003700,DNA-binding transcription factor activity; GO:0046983,protein dimerization activity; GO:0000987,proximal promoter sequence-specific DNA binding; GO:0043565,sequence-specific DNA binding; GO:0000982,transcription factor activity, RNA polymerase II proximal promoter sequence-specific DNA binding; GO:0045944,positive regulation of transcriptio…	SRF-type transcription factor (DNA-binding and dimerisation domain)
SMEL_001g123930.1	11.45	12.48	21.83	8.69	3.91	7.86	137	166	256	97	49	87	0.483	-1.049	0.00901444	0.0450963	down	SMEL3Ch01	9536474	9537306	+	SMEL_001g123930.1.01	--	K00384 thioredoxin reductase (NADPH) [EC:1.8.1.9] | (RefSeq) thioredoxin reductase 1-like (A)	PREDICTED: germin-like protein subfamily 1 member 13 [Solanum tuberosum]	RecName: Full=Germin-like protein subfamily 1 member 18; AltName: Full=GLP2a copy 1; Flags: Precursor;	SubName: Full=germin-like protein subfamily 1 member 20 {ECO:0000313|RefSeq:XP_009784933.1};	--	GO:0048046,apoplast; GO:0005618,cell wall; GO:0030145,manganese ion binding; GO:0045735,nutrient reservoir activity	Cupin
SMEL_001g124150.1	9.22	11.58	7.95	17.89	26.85	20.11	58	81	49	105	177	117	2.499	1.321	1.89521e-06	4.57939e-05	up	SMEL3Ch01	9757693	9758079	+	SMEL_001g124150.1.01	--	K22611 squamous cell carcinoma antigen recognized by T-cells 3 | (RefSeq) squamous cell carcinoma antigen recognized by T-cells 3-like (A)	PREDICTED: uncharacterized protein LOC101258195 [Solanum lycopersicum]	--	SubName: Full=Putative ovule protein {ECO:0000313|EMBL:JAP15599.1};	--	GO:0010112,regulation of systemic acquired resistance	NPR1 interacting
SMEL_001g124160.1	4.39	3.44	4.4	1.27	1.13	1.28	115	100	113	31	31	31	0.33	-1.598	4.93523e-08	1.88371e-06	down	SMEL3Ch01	9758687	9763342	-	SMEL_001g124160.1.01	--	K10396 kinesin family member 5 | (RefSeq) hypothetical protein (A)	PREDICTED: GDSL esterase/lipase At1g09390-like [Capsicum annuum]	RecName: Full=GDSL esterase/lipase At1g09390; EC=3.1.1.-; AltName: Full=Extracellular lipase At1g09390; Flags: Precursor;	SubName: Full=GDSL esterase/lipase {ECO:0000313|EMBL:PHT62229.1};	--	GO:0009570,chloroplast stroma; GO:0005576,extracellular region; GO:0016788,hydrolase activity, acting on ester bonds; GO:0016042,lipid catabolic process	GDSL-like Lipase/Acylhydrolase
SMEL_001g124170.1	9.34	8.84	5.96	2.92	2.15	1.59	216	227	135	63	52	34	0.305	-1.715	1.61516e-09	9.19618e-08	down	SMEL3Ch01	9767416	9771888	-	SMEL_001g124170.1.01	--	K17500 integrin-linked kinase-associated serine/threonine phosphatase 2C [EC:3.1.3.16] | (RefSeq) WAT1-related protein At3g18200-like (A)	PREDICTED: WAT1-related protein At1g09380-like isoform X1 [Solanum tuberosum]	RecName: Full=WAT1-related protein At1g09380;	RecName: Full=WAT1-related protein {ECO:0000256|RuleBase:RU363077};	--	GO:0016021,integral component of membrane; GO:0005886,plasma membrane; GO:0022857,transmembrane transporter activity	EamA-like transporter family
SMEL_001g124180.1	7.43	9.2	7.68	2.36	1.69	1.44	240	330	243	71	57	43	0.247	-2.015	4.08555e-17	9.25355e-15	down	SMEL3Ch01	9781770	9797245	-	SMEL_001g124180.1.01	--	K17500 integrin-linked kinase-associated serine/threonine phosphatase 2C [EC:3.1.3.16] | (RefSeq) WAT1-related protein At3g18200-like (A)	PREDICTED: WAT1-related protein At1g09380-like [Solanum tuberosum]	RecName: Full=WAT1-related protein At1g09380;	RecName: Full=WAT1-related protein {ECO:0000256|RuleBase:RU363077};	--	GO:0016021,integral component of membrane; GO:0005886,plasma membrane; GO:0022857,transmembrane transporter activity	EamA-like transporter family
SMEL_001g124190.1	3.69	3.9	4.14	1.47	1.26	1.23	81	95	89	30	29	25	0.371	-1.432	1.06475e-06	2.77194e-05	down	SMEL3Ch01	9801451	9806288	-	SMEL_001g124190.1.01	--	K17500 integrin-linked kinase-associated serine/threonine phosphatase 2C [EC:3.1.3.16] | (RefSeq) WAT1-related protein At3g18200-like (A)	PREDICTED: WAT1-related protein At1g09380-like [Solanum tuberosum]	RecName: Full=WAT1-related protein At1g09380;	RecName: Full=WAT1-related protein {ECO:0000256|RuleBase:RU363077};	--	GO:0016021,integral component of membrane; GO:0005886,plasma membrane; GO:0022857,transmembrane transporter activity	EamA-like transporter family
SMEL_001g124580.1	58.35	44.03	38.94	23.78	16.19	17.78	905	759	592	344	263	255	0.451	-1.15	5.1386e-08	1.94691e-06	down	SMEL3Ch01	10212474	10213427	-	SMEL_001g124580.1.01	--	K05953 nicotianamine synthase [EC:2.5.1.43] | (RefSeq) nicotianamine synthase (A)	PREDICTED: nicotianamine synthase [Solanum tuberosum]	RecName: Full=Nicotianamine synthase; EC=2.5.1.43; AltName: Full=Chloronerva; AltName: Full=S-adenosyl-L-methionine:S-adenosyl-L-methionine:S-adenosyl-methionine 3-amino-3-carboxypropyltransferase;	SubName: Full=Uncharacterized protein {ECO:0000313|EnsemblPlants:PGSC0003DMT400007275};	--	GO:0030410,nicotianamine synthase activity; GO:0030418,nicotianamine biosynthetic process	Nicotianamine synthase protein
SMEL_001g124860.1	24.84	28.68	17.26	12.79	8.4	9.41	254	326	173	122	90	89	0.478	-1.066	2.35156e-05	0.000394691	down	SMEL3Ch01	10484023	10484841	+	SMEL_001g124860.1.01	--	K21630 GATA-type zinc finger protein 1 | (RefSeq) putative GATA transcription factor 22 (A)	PREDICTED: GATA transcription factor 17 [Solanum tuberosum]	RecName: Full=GATA transcription factor 15;	SubName: Full=Uncharacterized protein {ECO:0000313|EnsemblPlants:PGSC0003DMT400063771};	GATA-4/5/6 transcription factors	GO:0005634,nucleus; GO:0005667,transcription factor complex; GO:0003682,chromatin binding; GO:0003700,DNA-binding transcription factor activity; GO:0000977,RNA polymerase II regulatory region sequence-specific DNA binding; GO:0001085,RNA polymerase II transcription factor binding; GO:0001228,DNA-binding transcription activator activity, RNA polymerase II-specific; GO:0008270,zinc ion binding; GO:…	GATA zinc finger
SMEL_001g125030.1	18.12	19.05	18.44	28.09	52.71	28.84	386	451	385	558	1176	568	2.174	1.121	5.05774e-05	0.000746741	up	SMEL3Ch01	10674474	10677339	+	SMEL_001g125030.1.01	--	K17506 protein phosphatase 1L [EC:3.1.3.16] | (RefSeq) probable protein phosphatase 2C 74 (A)	PREDICTED: probable protein phosphatase 2C 34 [Solanum lycopersicum]	RecName: Full=Probable protein phosphatase 2C 73; Short=AtPP2C73; EC=3.1.3.16; AltName: Full=AtPPC6;7;	SubName: Full=Uncharacterized protein {ECO:0000313|EnsemblPlants:Solyc01g100040.2.1};	Serine/threonine protein phosphatase	GO:0005886,plasma membrane; GO:0046872,metal ion binding; GO:0004722,protein serine/threonine phosphatase activity; GO:0009819,drought recovery; GO:0000226,microtubule cytoskeleton organization; GO:0045926,negative regulation of growth; GO:0006470,protein dephosphorylation	Protein phosphatase 2C
SMEL_001g125040.1	17.1	18.22	16.51	5.26	8.35	9.62	223	264	211	64	114	116	0.497	-1.009	0.00019812	0.00225356	down	SMEL3Ch01	10677504	10678561	-	SMEL_001g125040.1.01	--	K01520 dUTP pyrophosphatase [EC:3.6.1.23] | (RefSeq) deoxyuridine 5'-triphosphate nucleotidohydrolase (A)	PREDICTED: deoxyuridine 5'-triphosphate nucleotidohydrolase [Solanum tuberosum]	RecName: Full=Deoxyuridine 5'-triphosphate nucleotidohydrolase; Short=dUTPase; EC=3.6.1.23; AltName: Full=P18; AltName: Full=dUTP pyrophosphatase;	SubName: Full=Uncharacterized protein {ECO:0000313|EnsemblPlants:PGSC0003DMT400063599};	dUTPase	GO:0004170,dUTP diphosphatase activity; GO:0000287,magnesium ion binding; GO:0006226,dUMP biosynthetic process; GO:0046081,dUTP catabolic process	dUTPase
SMEL_001g125060.1	5.27	8.12	13.09	14.86	14.33	25.14	87	149	212	229	248	384	2.235	1.16	0.00372328	0.0230122	up	SMEL3Ch01	10703055	10704395	+	SMEL_001g125060.1.01	--	K03188 urease accessory protein | (RefSeq) uncharacterized protein LOC108224146 isoform X1 (A)	hypothetical protein CQW23_31348 [Capsicum baccatum]	RecName: Full=F-box protein PP2-B15; AltName: Full=Protein PHLOEM PROTEIN 2-LIKE B15; Short=AtPP2-B15;	SubName: Full=Uncharacterized protein {ECO:0000313|EMBL:PHT29082.1};	--	GO:0030246,carbohydrate binding	Phloem protein 2
SMEL_001g125070.1	1.02	0.59	0.92	1.61	4.3	7.01	17	11	15	25	75	108	5.695	2.51	1.53826e-05	0.000278848	up	SMEL3Ch01	10707464	10708709	+	SMEL_001g125070.1.01	--	K03188 urease accessory protein | (RefSeq) uncharacterized protein LOC108224146 isoform X1 (A)	PREDICTED: F-box protein PP2-B15 [Solanum lycopersicum]	RecName: Full=F-box protein PP2-B15; AltName: Full=Protein PHLOEM PROTEIN 2-LIKE B15; Short=AtPP2-B15;	SubName: Full=Uncharacterized protein {ECO:0000313|EnsemblPlants:Solyc01g100000.2.1};	--	GO:0030246,carbohydrate binding	Phloem protein 2
SMEL_001g125120.1	0.42	0.45	0.98	0.99	1.99	1.58	11	13	25	24	54	38	2.692	1.428	0.00664993	0.0360851	up	SMEL3Ch01	10743075	10746901	+	SMEL_001g125120.1.01	--	K01051 pectinesterase [EC:3.1.1.11] | (RefSeq) probable pectinesterase/pectinesterase inhibitor 20 (A)	PREDICTED: probable pectinesterase/pectinesterase inhibitor 20 [Solanum tuberosum]	RecName: Full=Probable pectinesterase/pectinesterase inhibitor 41; Includes: RecName: Full=Pectinesterase inhibitor 41; AltName: Full=Pectin methylesterase inhibitor 41; Includes: RecName: Full=Pectinesterase 41; Short=PE 41; EC=3.1.1.11; AltName: Full=AtPMEpcrB; AltName: Full=Pectin methylesterase 41; Short=AtPME41; Flags: Precursor;	RecName: Full=Pectinesterase {ECO:0000256|RuleBase:RU000589}; EC=3.1.1.11 {ECO:0000256|RuleBase:RU000589};	--	GO:0071944,cell periphery; GO:0005618,cell wall; GO:0005576,extracellular region; GO:0045330,aspartyl esterase activity; GO:0030599,pectinesterase activity; GO:0046910,pectinesterase inhibitor activity; GO:0042545,cell wall modification; GO:0045490,pectin catabolic process; GO:0009741,response to brassinosteroid; GO:0009409,response to cold; GO:0009620,response to fungus	Pectinesterase
SMEL_001g125210.1	894.74	855.43	542.16	228.39	337.47	270.85	11768	12504	6989	2802	4650	3294	0.407	-1.297	1.29964e-08	5.83594e-07	down	SMEL3Ch01	10835552	10837815	-	SMEL_001g125210.1.01	--	--	PREDICTED: dormancy-associated protein homolog 3 [Solanum lycopersicum]	RecName: Full=Dormancy-associated protein homolog 3 {ECO:0000305}; AltName: Full=DRM1 homolog 3 {ECO:0000305};	SubName: Full=Uncharacterized protein {ECO:0000313|EnsemblPlants:Solyc01g099840.2.1};	--	--	Dormancy/auxin associated protein
SMEL_001g125460.1	14.24	12.98	16.24	6.77	3.98	5.87	239	242	267	106	70	91	0.418	-1.26	1.7142e-06	4.19116e-05	down	SMEL3Ch01	11375359	11376390	+	SMEL_001g125460.1.01	--	K22097 3-O-acetylpapaveroxine carboxylesterase [EC:3.1.1.105] | (RefSeq) carboxylesterase 1-like (A)	PREDICTED: carboxylesterase 1-like [Solanum tuberosum]	RecName: Full=Carboxylesterase 1; Short=AeCXE1; EC=3.1.1.1;	SubName: Full=Uncharacterized protein {ECO:0000313|EnsemblPlants:PGSC0003DMT400057919};	Arylacetamide deacetylase	GO:0052689,carboxylic ester hydrolase activity; GO:0008152,metabolic process	alpha/beta hydrolase fold
SMEL_001g126060.1	0.48	0.27	0.56	1.3	0.93	2.1	8	5	9	20	16	32	3.635	1.862	0.00222019	0.0154595	up	SMEL3Ch01	11976956	11979737	+	SMEL_001g126060.1.01	--	--	PREDICTED: alpha-crystallin domain-containing protein 22.3-like [Solanum tuberosum]	RecName: Full=Alpha-crystallin domain-containing protein 22.3 {ECO:0000303|PubMed:16531488}; Short=AtAcd22.3 {ECO:0000303|PubMed:16531488}; AltName: Full=Increased DNA methylation 2-like protein {ECO:0000305};	SubName: Full=Uncharacterized protein {ECO:0000313|EnsemblPlants:PGSC0003DMT400073582};	--	GO:0005730,nucleolus	Hsp20/alpha crystallin family
SMEL_001g126080.1	0.39	0.26	0.51	1.5	1.3	1.55	11	8	14	39	38	40	4.123	2.044	5.01458e-06	0.000107131	up	SMEL3Ch01	11987636	11989738	+	SMEL_001g126080.1.01	--	K03063 26S proteasome regulatory subunit T3 | (RefSeq) 26S protease regulatory subunit 6B homolog (A)	PREDICTED: coleoptile phototropism protein 1-like [Solanum tuberosum]	RecName: Full=Coleoptile phototropism protein 1; AltName: Full=BTB/POZ domain-containing protein CPT1; AltName: Full=Non-phototropic hypocotyl 3-like protein; Short=NPH3-like protein;	SubName: Full=Uncharacterized protein {ECO:0000313|EnsemblPlants:PGSC0003DMT400073584};	--	GO:0005886,plasma membrane; GO:0009638,phototropism; GO:0016567,protein ubiquitination	NPH3 family
SMEL_001g126300.1	2.73	2.56	2.84	5.36	5.32	5.29	48	50	49	88	98	86	2.165	1.115	9.21834e-06	0.000180094	up	SMEL3Ch01	12156454	12157872	-	SMEL_001g126300.1.01	--	K21026 acetylajmaline esterase [EC:3.1.1.80] | (RefSeq) GDSL esterase/lipase At5g03980-like (A)	PREDICTED: GDSL esterase/lipase At5g03980-like [Solanum tuberosum]	RecName: Full=GDSL esterase/lipase At5g03980; EC=3.1.1.-; AltName: Full=Extracellular lipase At5g03980; Flags: Precursor;	SubName: Full=acetylajmalan esterase-like {ECO:0000313|RefSeq:XP_016538594.1};	--	GO:0005576,extracellular region; GO:0016788,hydrolase activity, acting on ester bonds; GO:0016042,lipid catabolic process	GDSL-like Lipase/Acylhydrolase
SMEL_001g126530.1	1.48	2.15	1.69	0.84	0.79	0.71	34	55	38	18	19	15	0.483	-1.05	0.00692535	0.0371197	down	SMEL3Ch01	12463441	12464853	+	SMEL_001g126530.1.01	--	--	hypothetical protein CQW23_20156 [Capsicum baccatum]	--	SubName: Full=Uncharacterized protein {ECO:0000313|EMBL:PHT41302.1};	--	--	Putative S-adenosyl-L-methionine-dependent methyltransferase
SMEL_001g126670.1	74.64	95.99	102.47	37.1	34.53	42.2	813	1162	1094	377	394	425	0.457	-1.129	7.5719e-08	2.71889e-06	down	SMEL3Ch01	12624513	12625293	-	SMEL_001g126670.1.01	--	K11251 histone H2A | (RefSeq) histone H2A.1-like (A)	PREDICTED: histone H2A.1-like [Capsicum annuum]	RecName: Full=Histone H2A.1; AltName: Full=LeH2A-1;	RecName: Full=Histone H2A {ECO:0000256|RuleBase:RU003767};	Histone 2A	GO:0000790,nuclear chromatin; GO:0000786,nucleosome; GO:0003677,DNA binding; GO:0046982,protein heterodimerization activity; GO:0006342,chromatin silencing	C-terminus of histone H2A
SMEL_001g126700.1	139.32	128.85	189.92	281.94	321.76	396.51	863	887	1153	1629	2088	2271	2.392	1.258	5.03581e-07	1.44963e-05	up	SMEL3Ch01	12668264	12668644	-	SMEL_001g126700.1.01	--	--	rapid alkalinization factor 2 [Solanum chacoense]	RecName: Full=Rapid alkalinization factor; Short=NtRALF; Flags: Precursor;	SubName: Full=Putative rapid alkalinization factor 2-like {ECO:0000313|EMBL:JAP15260.1}; SubName: Full=Rapid alkalinization factor 2 {ECO:0000313|EMBL:AAR00326.1};	--	GO:0005576,extracellular region; GO:0005622,intracellular; GO:0005179,hormone activity; GO:0004871,NA; GO:0019722,calcium-mediated signaling	Rapid ALkalinization Factor (RALF)
SMEL_001g126780.1	15.45	33.54	14.21	10.44	10.77	6.18	538	1298	485	339	393	199	0.48	-1.058	0.00254315	0.0171241	down	SMEL3Ch01	12754626	12757887	+	SMEL_001g126780.1.01	--	K09490 heat shock 70kDa protein 5 | (RefSeq) luminal-binding protein 5 (A)	Luminal-binding protein 5 [Capsicum annuum]	RecName: Full=Luminal-binding protein 5; Short=BiP 5; AltName: Full=78 kDa glucose-regulated protein homolog 5; Short=GRP-78-5; Flags: Precursor;	SubName: Full=Luminal-binding protein 5 {ECO:0000313|EMBL:PHT62035.1};	Molecular chaperones GRP78/BiP/KAR2, HSP70 superfamily	GO:0005788,endoplasmic reticulum lumen; GO:0005524,ATP binding	Hsp70 protein
SMEL_001g126800.1	433.84	427.05	500.62	566.86	1132.82	1137.05	7427	8125	8400	9052	20317	17999	2.302	1.203	4.478e-05	0.000671733	up	SMEL3Ch01	12764383	12766597	+	SMEL_001g126800.1.01	--	K17616 CTD small phosphatase-like protein 2 [EC:3.1.3.-] | (RefSeq) uncharacterized protein LOC110713815 (A)	PREDICTED: stress-related protein [Solanum tuberosum]	RecName: Full=Stress-related protein;	SubName: Full=Putative stress-related protein-like {ECO:0000313|EMBL:JAP27354.1};	--	--	Rubber elongation factor protein (REF)
SMEL_001g127130.1	14.43	12.68	11.54	49.46	189.3	229.71	291	284	228	930	3998	4282	13.578	3.763	2.33749e-16	4.58838e-14	up	SMEL3Ch01	13201486	13203229	-	SMEL_001g127130.1.01	--	K17098 annexin D | (RefSeq) annexin D4-like (A)	PREDICTED: annexin D4-like [Solanum tuberosum]	RecName: Full=Annexin D4; AltName: Full=AnnAt4;	SubName: Full=Uncharacterized protein {ECO:0000313|EMBL:PHT74923.1};	Annexin	GO:0009506,plasmodesma; GO:0005509,calcium ion binding; GO:0005544,calcium-dependent phospholipid binding; GO:0003729,mRNA binding; GO:0009737,response to abscisic acid; GO:0009409,response to cold; GO:0009408,response to heat; GO:0006970,response to osmotic stress; GO:0009651,response to salt stress; GO:0009414,response to water deprivation	Annexin
SMEL_001g127140.1	9.33	13.2	7.32	11.56	23.36	30.52	199	313	153	230	522	602	2.459	1.298	0.000499632	0.00472406	up	SMEL3Ch01	13213377	13218078	+	SMEL_001g127140.1.01	--	K17098 annexin D | (RefSeq) annexin D3-like (A)	Annexin D3 [Capsicum baccatum]	RecName: Full=Annexin D3; AltName: Full=AnnAt3;	RecName: Full=Annexin {ECO:0000256|RuleBase:RU003540};	Annexin	GO:0005773,vacuole; GO:0005509,calcium ion binding; GO:0005544,calcium-dependent phospholipid binding; GO:0009409,response to cold; GO:0009408,response to heat; GO:0009651,response to salt stress; GO:0009414,response to water deprivation	Annexin
SMEL_001g127150.1	24.51	27.52	30.05	98.46	159.07	218.9	669	835	804	2507	4549	5525	6.422	2.683	1.54195e-18	3.97264e-16	up	SMEL3Ch01	13218717	13222419	-	SMEL_001g127150.1.01	--	K17098 annexin D | (RefSeq) annexin D4-like (A)	PREDICTED: annexin D4-like isoform X1 [Solanum tuberosum]	RecName: Full=Annexin D4; AltName: Full=AnnAt4;	SubName: Full=Uncharacterized protein {ECO:0000313|EnsemblPlants:PGSC0003DMT400050067};	Annexin	GO:0009506,plasmodesma; GO:0005509,calcium ion binding; GO:0005544,calcium-dependent phospholipid binding; GO:0003729,mRNA binding; GO:0009737,response to abscisic acid; GO:0009409,response to cold; GO:0009408,response to heat; GO:0006970,response to osmotic stress; GO:0009651,response to salt stress; GO:0009414,response to water deprivation	Annexin
SMEL_001g127160.1	6.28	7.12	6.45	12.01	24.06	33.57	130	164	131	232	522	643	3.905	1.965	7.09734e-08	2.57541e-06	up	SMEL3Ch01	13231083	13234552	+	SMEL_001g127160.1.01	--	K17098 annexin D | (RefSeq) annexin D3-like (A)	PREDICTED: annexin D3-like isoform X2 [Capsicum annuum]	RecName: Full=Annexin D3; AltName: Full=AnnAt3;	RecName: Full=Annexin {ECO:0000256|RuleBase:RU003540};	Annexin	GO:0005773,vacuole; GO:0005509,calcium ion binding; GO:0005544,calcium-dependent phospholipid binding; GO:0009409,response to cold; GO:0009408,response to heat; GO:0009651,response to salt stress; GO:0009414,response to water deprivation	Annexin
SMEL_001g127230.1	2.03	2.34	0.28	0.5	0.21	0.05	82	105	11	19	9	2	0.185	-2.438	0.0029227	0.0190788	down	SMEL3Ch01	13295239	13298556	+	SMEL_001g127230.1.01	--	K05681 ATP-binding cassette, subfamily G (WHITE), member 2 | (RefSeq) ABC transporter G family member 20-like (A)	PREDICTED: ABC transporter G family member 18-like [Solanum tuberosum]	RecName: Full=ABC transporter G family member 19; Short=ABC transporter ABCG.19; Short=AtABCG19; AltName: Full=White-brown complex homolog protein 19; Short=AtWBC19;	SubName: Full=Uncharacterized protein {ECO:0000313|EnsemblPlants:PGSC0003DMT400050007};	Transporter, ABC superfamily (Breast cancer resistance protein)	GO:0016021,integral component of membrane; GO:0005886,plasma membrane; GO:0005775,vacuolar lumen; GO:0005774,vacuolar membrane; GO:0005524,ATP binding; GO:0042626,ATPase activity, coupled to transmembrane movement of substances; GO:0042891,antibiotic transport; GO:0007034,vacuolar transport	ABC-2 type transporter
SMEL_001g127560.1	0	0	0.39	2.04	2.78	4.25	0	0	3	15	23	31	26.575	4.732	6.42175e-06	0.000132624	up	SMEL3Ch01	13601505	13603434	+	SMEL_001g127560.1.01	--	--	PREDICTED: uncharacterized protein LOC107012747 [Solanum pennellii]	RecName: Full=Protein JAZ13 {ECO:0000303|PubMed:25846245}; AltName: Full=Jasmonate ZIM domain-containing protein 13 {ECO:0000303|PubMed:25846245};	SubName: Full=Uncharacterized protein {ECO:0000313|EnsemblPlants:Solyc01g097060.2.1};	--	GO:0005634,nucleus; GO:0003714,transcription corepressor activity; GO:0006952,defense response; GO:0009867,jasmonic acid mediated signaling pathway; GO:0031347,regulation of defense response; GO:2000022,regulation of jasmonic acid mediated signaling pathway; GO:0006355,regulation of transcription, DNA-templated; GO:0009611,response to wounding; GO:0006351,transcription, DNA-templated	Divergent CCT motif
SMEL_001g127650.1	10.46	10.22	6.65	2.11	3.46	3.43	488	530	304	92	169	148	0.368	-1.442	1.0277e-07	3.57201e-06	down	SMEL3Ch01	13707982	13713423	+	SMEL_001g127650.1.01	--	K13420 LRR receptor-like serine/threonine-protein kinase FLS2 [EC:2.7.11.1] | (RefSeq) LRR receptor-like serine/threonine-protein kinase FLS2 (A)	PREDICTED: probable inactive leucine-rich repeat receptor-like protein kinase At3g03770 [Solanum lycopersicum]	RecName: Full=Probable inactive leucine-rich repeat receptor-like protein kinase At3g03770; Flags: Precursor;	SubName: Full=Uncharacterized protein {ECO:0000313|EnsemblPlants:Solyc01g096940.2.1};	--	GO:0016021,integral component of membrane; GO:0005886,plasma membrane; GO:0005524,ATP binding; GO:0004672,protein kinase activity	Protein tyrosine kinase
SMEL_001g127750.1	1.13	1.08	1.25	0.39	0.6	0.36	34	36	37	11	19	10	0.433	-1.208	0.00589546	0.0328421	down	SMEL3Ch01	13869783	13871633	+	SMEL_001g127750.1.01	--	--	PREDICTED: protein ENDOSPERM DEFECTIVE 1-like [Solanum tuberosum]	RecName: Full=Protein ENDOSPERM DEFECTIVE 1; AltName: Full=Protein EMBRYO DEFECTIVE 3116; AltName: Full=QWRF motif-containing protein 5;	SubName: Full=Uncharacterized protein {ECO:0000313|EnsemblPlants:PGSC0003DMT400070749};	--	GO:0005737,cytoplasm; GO:0005880,nuclear microtubule; GO:0005634,nucleus; GO:0051301,cell division; GO:0010342,endosperm cellularization; GO:0009960,endosperm development; GO:0000226,microtubule cytoskeleton organization; GO:0048316,seed development	QWRF family
SMEL_001g127900.1	0.82	1.06	0.91	1.73	1.88	1.51	23	33	25	45	55	39	2.013	1.009	0.00261934	0.0174787	up	SMEL3Ch01	14089294	14095780	+	SMEL_001g127900.1.01	--	K12818 ATP-dependent RNA helicase DHX8/PRP22 [EC:3.6.4.13] | (RefSeq) hypothetical protein (A)	PREDICTED: protein ZINC INDUCED FACILITATOR-LIKE 1-like isoform X2 [Solanum tuberosum]	RecName: Full=Protein ZINC INDUCED FACILITATOR-LIKE 1; AltName: Full=Protein ZIF-LIKE 1;	SubName: Full=Putative peptide/nitrate transporter {ECO:0000313|EMBL:PHT40999.1};	Permease of the major facilitator superfamily	GO:0016021,integral component of membrane; GO:0009705,plant-type vacuole membrane; GO:0005886,plasma membrane; GO:0022821,potassium ion antiporter activity; GO:0010540,basipetal auxin transport; GO:0009630,gravitropism; GO:0090333,regulation of stomatal closure; GO:0080167,response to karrikin; GO:0009414,response to water deprivation; GO:0048364,root development	Major Facilitator Superfamily
SMEL_001g127940.1	2.31	2.25	0.53	0.07	0.15	0.07	75	81	17	2	5	2	0.063	-3.994	1.35495e-07	4.56322e-06	down	SMEL3Ch01	14149404	14152741	+	SMEL_001g127940.1.01	--	K04733 interleukin-1 receptor-associated kinase 4 [EC:2.7.11.1] | (RefSeq) probable serine/threonine-protein kinase RLCKVII isoform X1 (A)	PREDICTED: serine/threonine-protein kinase CDG1-like [Solanum pennellii]	RecName: Full=Proline-rich receptor-like protein kinase PERK3; EC=2.7.11.1; AltName: Full=Proline-rich extensin-like receptor kinase 3; Short=AtPERK3;	SubName: Full=Uncharacterized protein {ECO:0000313|EnsemblPlants:PGSC0003DMT400008513};	Serine/threonine protein kinase	GO:0016021,integral component of membrane; GO:0005886,plasma membrane; GO:0005524,ATP binding; GO:0004675,transmembrane receptor protein serine/threonine kinase activity; GO:0007166,cell surface receptor signaling pathway; GO:0006468,protein phosphorylation	Protein tyrosine kinase
SMEL_001g127960.1	50.74	46.64	37.23	52.53	69	136.54	1521	1554	1094	1469	2167	3785	2.146	1.102	0.00145066	0.011126	up	SMEL3Ch01	14167115	14170468	-	SMEL_001g127960.1.01	--	K09754 coumaroylquinate(coumaroylshikimate) 3'-monooxygenase [EC:1.14.13.36] | (RefSeq) cytochrome P450 98A2-like (A)	PREDICTED: cytochrome P450 98A2-like [Solanum tuberosum]	RecName: Full=Cytochrome P450 98A2; EC=1.14.-.-;	SubName: Full=cytochrome P450 98A2-like {ECO:0000313|RefSeq:XP_016482834.1};	Cytochrome P450 CYP2 subfamily	GO:0016021,integral component of membrane; GO:0016020,membrane; GO:0020037,heme binding; GO:0005506,iron ion binding; GO:0016709,oxidoreductase activity, acting on paired donors, with incorporation or reduction of molecular oxygen, NAD(P)H as one donor, and incorporation of one atom of oxygen; GO:0009809,lignin biosynthetic process	Cytochrome P450
SMEL_001g128000.1	4.79	3.64	3.77	2.08	1.61	1.72	148	125	114	60	52	49	0.488	-1.036	3.72424e-05	0.000577579	down	SMEL3Ch01	14225492	14230029	-	SMEL_001g128000.1.01	--	--	PREDICTED: uncharacterized protein LOC102590196 isoform X2 [Solanum tuberosum]	--	SubName: Full=Uncharacterized protein {ECO:0000313|EnsemblPlants:PGSC0003DMT400008498};	--	--	--
SMEL_001g128250.1	4.03	3.37	1.37	3.52	5.92	7.26	87	81	29	71	134	145	2.147	1.102	0.00981469	0.0479362	up	SMEL3Ch01	14564185	14565513	-	SMEL_001g128250.1.01	--	K13422 transcription factor MYC2 | (RefSeq) transcription factor MYC4-like (A)	PREDICTED: transcription factor MYC2-like [Solanum tuberosum]	RecName: Full=Transcription factor bHLH14; AltName: Full=Basic helix-loop-helix protein 14; Short=AtbHLH14; Short=bHLH 14; AltName: Full=Transcription factor EN 33; AltName: Full=bHLH transcription factor bHLH014;	SubName: Full=Uncharacterized protein {ECO:0000313|EnsemblPlants:PGSC0003DMT400047220};	--	GO:0005737,cytoplasm; GO:0005634,nucleus; GO:0003677,DNA binding; GO:0003700,DNA-binding transcription factor activity; GO:0046983,protein dimerization activity; GO:0010629,negative regulation of gene expression; GO:0006355,regulation of transcription, DNA-templated; GO:0006351,transcription, DNA-templated	bHLH-MYC and R2R3-MYB transcription factors N-terminal
SMEL_001g128530.1	5.9	5.65	1.51	1.88	0.44	0.91	155	165	39	46	12	22	0.274	-1.869	0.00152361	0.0115141	down	SMEL3Ch01	14831442	14833664	-	SMEL_001g128530.1.01	--	K03695 ATP-dependent Clp protease ATP-binding subunit ClpB | (RefSeq) chaperone protein ClpB1-like (A)	PREDICTED: aluminum-activated malate transporter 10 [Solanum tuberosum]	RecName: Full=Aluminum-activated malate transporter 10; Short=AtALMT10;	SubName: Full=Uncharacterized protein {ECO:0000313|EnsemblPlants:Solyc01g096140.2.1};	Predicted membrane protein	GO:0016021,integral component of membrane; GO:0009705,plant-type vacuole membrane; GO:0015140,malate transmembrane transporter activity	Aluminium activated malate transporter
SMEL_001g128600.1	91.25	106.12	92.93	47.44	37.8	40.44	3860	4989	3853	1872	1675	1582	0.476	-1.071	1.13397e-14	1.75731e-12	down	SMEL3Ch01	14927837	14932264	-	SMEL_001g128600.1.01	--	K14486 auxin response factor | (RefSeq) auxin response factor 18 (A)	PREDICTED: auxin response factor 18 isoform X3 [Solanum tuberosum]	RecName: Full=Auxin response factor 9;	RecName: Full=Auxin response factor {ECO:0000256|RuleBase:RU004561};	--	GO:0005634,nucleus; GO:0003700,DNA-binding transcription factor activity; GO:0043565,sequence-specific DNA binding; GO:0009734,auxin-activated signaling pathway; GO:0006351,transcription, DNA-templated	Auxin response factor
SMEL_001g128680.1	30.45	27.4	19.16	11.1	12.01	9.33	300	300	185	102	124	85	0.467	-1.097	1.12185e-06	2.89756e-05	down	SMEL3Ch01	15031075	15031680	-	SMEL_001g128680.1.01	--	--	hypothetical protein BC332_21652 [Capsicum chinense]	--	SubName: Full=Uncharacterized protein {ECO:0000313|EMBL:PHU09792.1};	--	--	Late embryogenesis abundant protein
SMEL_001g128710.1	14.42	12.62	19.14	39.49	33.96	38.88	551	536	717	1408	1360	1374	2.655	1.409	4.02786e-10	2.62716e-08	up	SMEL3Ch01	15048252	15062789	+	SMEL_001g128710.1.01	--	K01528 dynamin 1/3 [EC:3.6.5.5] | (RefSeq) dynamin-related protein 5A (A)	PREDICTED: dynamin-related protein 5A [Solanum pennellii]	RecName: Full=Dynamin-related protein 5A; AltName: Full=Soybean dynamin-like protein 5A; Short=SDL5A;	SubName: Full=Putative dynamin-related protein 5A-like {ECO:0000313|EMBL:JAP33423.1};	Vacuolar sorting protein VPS1, dynamin, and related proteins	GO:0005737,cytoplasm; GO:0005874,microtubule; GO:0009524,phragmoplast; GO:0005525,GTP binding; GO:0003924,GTPase activity; GO:0008017,microtubule binding; GO:0007049,cell cycle; GO:0051301,cell division; GO:0000266,mitochondrial fission	Dynamin central region
SMEL_001g128900.1	11.89	11.78	9.63	24.9	18.6	22.19	426	469	338	832	698	735	2.176	1.122	4.38705e-12	4.30043e-10	up	SMEL3Ch01	15249325	15258047	+	SMEL_001g128900.1.01	--	K01897 long-chain acyl-CoA synthetase [EC:6.2.1.3] | (RefSeq) long chain acyl-CoA synthetase 4-like (A)	PREDICTED: long chain acyl-CoA synthetase 4-like [Solanum tuberosum]	RecName: Full=Long chain acyl-CoA synthetase 4; EC=6.2.1.3;	SubName: Full=Uncharacterized protein {ECO:0000313|EnsemblPlants:PGSC0003DMT400000613};	Long-chain acyl-CoA synthetases (AMP-forming)	GO:0005794,Golgi apparatus; GO:0005886,plasma membrane; GO:0005524,ATP binding; GO:0102391,decanoate-CoA ligase activity; GO:0004467,long-chain fatty acid-CoA ligase activity; GO:0006631,fatty acid metabolic process	AMP-binding enzyme
SMEL_001g128950.1	9.19	6.48	0.7	0.22	0.59	0.3	134	105	10	3	9	4	0.078	-3.689	7.20186e-06	0.000145527	down	SMEL3Ch01	15620488	15621384	+	SMEL_001g128950.1.01	--	K01183 chitinase [EC:3.2.1.14] | (RefSeq) acidic endochitinase-like (A)	PREDICTED: acidic endochitinase-like [Solanum lycopersicum]	RecName: Full=Acidic endochitinase; EC=3.2.1.14; Flags: Precursor;	SubName: Full=Uncharacterized protein {ECO:0000313|EnsemblPlants:Solyc01g095250.1.1};	Chitinase	GO:0004568,chitinase activity; GO:0006032,chitin catabolic process; GO:0000272,polysaccharide catabolic process	Glycosyl hydrolases family 18
SMEL_001g128990.1	1.64	1.53	1.77	0.26	0.03	0.16	55	57	58	8	1	5	0.097	-3.369	1.98533e-09	1.09999e-07	down	SMEL3Ch01	15641840	15646337	+	SMEL_001g128990.1.01	--	K00521 ferric-chelate reductase [EC:1.16.1.7] | (RefSeq) FRO1, LeFRO1; ferric-chelate reductase (A)	ferric-chelate reductase [Solanum lycopersicum]	RecName: Full=Ferric reduction oxidase 2; Short=AtFRO2; EC=1.16.1.7; AltName: Full=Ferric-chelate reductase 2; AltName: Full=Protein FERRIC CHELATE REDUCTASE DEFECTIVE 1;	SubName: Full=Uncharacterized protein {ECO:0000313|EnsemblPlants:PGSC0003DMT400000534};	Ferric reductase, NADH/NADPH oxidase and related proteins	GO:0016021,integral component of membrane; GO:0005886,plasma membrane; GO:0000293,ferric-chelate reductase activity; GO:0046872,metal ion binding; GO:0006811,ion transport; GO:0015688,iron chelate transport; GO:0055072,iron ion homeostasis; GO:0009617,response to bacterium	Ferric reductase NAD binding domain
SMEL_001g129000.1	0.34	0.28	0.5	0	0	0.03	11	10	16	0	0	1	0.033	-4.903	0.000474827	0.00454771	down	SMEL3Ch01	15651788	15655419	-	SMEL_001g129000.1.01	--	K00521 ferric-chelate reductase [EC:1.16.1.7] | (RefSeq) ferric reduction oxidase 2-like (A)	PREDICTED: ferric reduction oxidase 2-like [Solanum tuberosum]	RecName: Full=Ferric reduction oxidase 2; Short=AtFRO2; EC=1.16.1.7; AltName: Full=Ferric-chelate reductase 2; AltName: Full=Protein FERRIC CHELATE REDUCTASE DEFECTIVE 1;	SubName: Full=Uncharacterized protein {ECO:0000313|EnsemblPlants:PGSC0003DMT400000534};	Ferric reductase, NADH/NADPH oxidase and related proteins	GO:0016021,integral component of membrane; GO:0005886,plasma membrane; GO:0000293,ferric-chelate reductase activity; GO:0046872,metal ion binding; GO:0006811,ion transport; GO:0015688,iron chelate transport; GO:0055072,iron ion homeostasis; GO:0009617,response to bacterium	Ferric reductase NAD binding domain
SMEL_001g129250.1	4.59	4.96	4.06	0.33	0.29	0.66	15	18	13	1	1	2	0.103	-3.279	0.000441802	0.00429123	down	SMEL3Ch01	15926714	15927042	+	SMEL_001g129250.1.01	--	--	PREDICTED: arabinogalactan peptide 16 [Solanum tuberosum]	RecName: Full=Arabinogalactan peptide 20; Short=AG-peptide 20; Flags: Precursor;	SubName: Full=Uncharacterized protein {ECO:0000313|EnsemblPlants:PGSC0003DMT400000593};	--	GO:0031225,anchored component of membrane; GO:0005886,plasma membrane	Arabinogalactan peptide
SMEL_001g129410.1	612.28	617.01	559.99	221.33	154.67	131.71	42385	47470	37995	14292	11217	8431	0.311	-1.685	2.74891e-18	6.90948e-16	down	SMEL3Ch01	16087978	16093162	-	SMEL_001g129410.1.01	--	K13448 calcium-binding protein CML | (RefSeq) probable calcium-binding protein CML50 (A)	PREDICTED: BAG family molecular chaperone regulator 6 [Solanum tuberosum]	RecName: Full=BAG family molecular chaperone regulator 6 {ECO:0000303|Ref.3}; AltName: Full=Bcl-2-associated athanogene 6 {ECO:0000303|Ref.3}; AltName: Full=CaM-binding protein 1 {ECO:0000303|PubMed:16003391}; Contains: RecName: Full=Cleaved BAG6 {ECO:0000303|PubMed:26739014};	SubName: Full=Uncharacterized protein {ECO:0000313|EnsemblPlants:PGSC0003DMT400000246};	--	GO:0009506,plasmodesma; GO:0005516,calmodulin binding; GO:0051087,chaperone binding; GO:0006914,autophagy; GO:0050832,defense response to fungus; GO:0009817,defense response to fungus, incompatible interaction; GO:0012502,induction of programmed cell death; GO:0010508,positive regulation of autophagy; GO:0006457,protein folding; GO:0009408,response to heat; GO:0009644,response to high light inten…	BAG domain
SMEL_001g129420.1	2.44	2.44	0.28	0	0.06	0	36	40	4	0	1	0	0.017	-5.919	5.29552e-05	0.000773753	down	SMEL3Ch01	16094133	16095038	-	SMEL_001g129420.1.01	--	K01183 chitinase [EC:3.2.1.14] | (RefSeq) acidic endochitinase-like (A)	PREDICTED: acidic endochitinase-like [Solanum tuberosum]	RecName: Full=Acidic endochitinase; EC=3.2.1.14; Flags: Precursor;	SubName: Full=Uncharacterized protein {ECO:0000313|EnsemblPlants:PGSC0003DMT400000244};	Chitinase	GO:0005576,extracellular region; GO:0005615,extracellular space; GO:0008422,beta-glucosidase activity; GO:0008061,chitin binding; GO:0004568,chitinase activity; GO:0003796,lysozyme activity; GO:0042631,cellular response to water deprivation; GO:0006032,chitin catabolic process; GO:0052033,pathogen-associated molecular pattern dependent induction by symbiont of host innate immune response; GO:0000…	Glycosyl hydrolases family 18
SMEL_001g129530.1	560.58	627.87	905.59	1304.27	1580.08	1394.17	8093	10074	12814	17564	23898	18611	2.227	1.155	2.71815e-06	6.28306e-05	up	SMEL3Ch01	16263114	16265666	-	SMEL_001g129530.1.01	--	--	hypothetical protein CQW23_19707 [Capsicum baccatum]	RecName: Full=Desiccation protectant protein Lea14 homolog;	SubName: Full=Uncharacterized protein {ECO:0000313|EMBL:PHT40853.1};	--	GO:0009269,response to desiccation	Late embryogenesis abundant protein
SMEL_001g129540.1	14.42	11.58	12.01	49.31	155.75	57.15	158	141	129	504	1788	579	7.636	2.933	1.63568e-12	1.72005e-10	up	SMEL3Ch01	16269883	16271173	-	SMEL_001g129540.1.01	--	--	PREDICTED: desiccation protectant protein Lea14 homolog [Solanum tuberosum]	RecName: Full=Desiccation protectant protein Lea14 homolog;	SubName: Full=Uncharacterized protein {ECO:0000313|EnsemblPlants:PGSC0003DMT400000220};	--	GO:0009269,response to desiccation	Late embryogenesis abundant protein
SMEL_001g129590.1	0.53	0.68	1.66	2.96	5.51	4.86	14	20	43	73	153	119	5.063	2.34	1.97933e-06	4.76033e-05	up	SMEL3Ch01	16357344	16360097	+	SMEL_001g129590.1.01	--	K20772 1-aminocyclopropane-1-carboxylate synthase 1/2/6 [EC:4.4.1.14] | (RefSeq) 1-aminocyclopropane-1-carboxylate synthase 2 (A)	PREDICTED: 1-aminocyclopropane-1-carboxylate synthase 2 [Solanum tuberosum]	RecName: Full=1-aminocyclopropane-1-carboxylate synthase 2; Short=ACC synthase 2; EC=4.4.1.14; AltName: Full=Le-ACS2; Short=ACS-2; AltName: Full=S-adenosyl-L-methionine methylthioadenosine-lyase 2;	SubName: Full=Uncharacterized protein {ECO:0000313|EnsemblPlants:PGSC0003DMT400000553};	1-aminocyclopropane-1-carboxylate synthase, and related proteins	GO:0016847,1-aminocyclopropane-1-carboxylate synthase activity; GO:0030170,pyridoxal phosphate binding; GO:0009693,ethylene biosynthetic process; GO:0009835,fruit ripening	Aminotransferase class I and II
SMEL_001g129710.1	36.36	45.13	30.22	8.66	7.14	13.67	788	1087	642	175	162	274	0.293	-1.77	2.70694e-10	1.85976e-08	down	SMEL3Ch01	16793804	16796363	-	SMEL_001g129710.1.01	--	K13034 L-3-cyanoalanine synthase/ cysteine synthase [EC:2.5.1.47 4.4.1.9] | (RefSeq) bifunctional L-3-cyanoalanine synthase/cysteine synthase 2, mitochondrial (A)	PREDICTED: bifunctional L-3-cyanoalanine synthase/cysteine synthase 2, mitochondrial [Solanum lycopersicum]	RecName: Full=Bifunctional L-3-cyanoalanine synthase/cysteine synthase 2, mitochondrial; EC=2.5.1.47; EC=4.4.1.9; Flags: Precursor;	RecName: Full=Cysteine synthase {ECO:0000256|RuleBase:RU003985}; EC=2.5.1.47 {ECO:0000256|RuleBase:RU003985};	Cystathionine beta-synthase and related enzymes	GO:0005739,mitochondrion; GO:0004124,cysteine synthase activity; GO:0050017,L-3-cyanoalanine synthase activity; GO:0016740,transferase activity; GO:0019499,cyanide metabolic process; GO:0006535,cysteine biosynthetic process from serine	Pyridoxal-phosphate dependent enzyme
SMEL_001g129750.1	3	3.09	3.47	7.07	5.39	6.32	76	87	86	167	143	148	2.157	1.109	1.19788e-06	3.08232e-05	up	SMEL3Ch01	16826220	16827776	+	SMEL_001g129750.1.01	--	K15398 fatty acid omega-hydroxylase [EC:1.14.-.-] | (RefSeq) cytochrome P450 86A8-like (A)	PREDICTED: cytochrome P450 86A8-like [Solanum tuberosum]	RecName: Full=Cytochrome P450 86A22 {ECO:0000303|PubMed:19940120}; EC=1.14.13.204 {ECO:0000269|PubMed:19940120}; AltName: Full=Long-chain acyl-CoA omega-monooxygenase {ECO:0000305};	SubName: Full=Uncharacterized protein {ECO:0000313|EnsemblPlants:Solyc01g094750.2.1};	Cytochrome P450 CYP4/CYP19/CYP26 subfamilies	GO:0016021,integral component of membrane; GO:0020037,heme binding; GO:0005506,iron ion binding; GO:0016709,oxidoreductase activity, acting on paired donors, with incorporation or reduction of molecular oxygen, NAD(P)H as one donor, and incorporation of one atom of oxygen; GO:0035336,long-chain fatty-acyl-CoA metabolic process	Cytochrome P450
SMEL_001g129770.1	15.55	13.92	11.98	26.74	26.96	31.48	396	394	299	635	719	741	2.275	1.186	6.27323e-13	6.98906e-11	up	SMEL3Ch01	16841456	16844310	-	SMEL_001g129770.1.01	--	K13508 glycerol-3-phosphate acyltransferase [EC:2.3.1.15 2.3.1.198] | (RefSeq) glycerol-3-phosphate 2-O-acyltransferase 4 (A)	Glycerol-3-phosphate 2-O-acyltransferase 4 [Capsicum baccatum]	RecName: Full=Glycerol-3-phosphate 2-O-acyltransferase 4; Short=AtGPAT4; EC=2.3.1.198; AltName: Full=Glycerol-3-phosphate acyltransferase 4;	SubName: Full=Glycerol-3-phosphate 2-O-acyltransferase 4 {ECO:0000313|EMBL:PHT40805.1};	--	GO:0016021,integral component of membrane; GO:0016020,membrane; GO:0090447,glycerol-3-phosphate 2-O-acyltransferase activity; GO:0016791,phosphatase activity; GO:0102419,sn-2-glycerol-3-phosphate omega-OH-C22:0-CoA acyl transferase activity; GO:0010143,cutin biosynthetic process; GO:0008654,phospholipid biosynthetic process	haloacid dehalogenase-like hydrolase
SMEL_001g130020.1	3.28	1.69	2.6	4.18	12.02	5.4	63	36	49	75	242	96	3.162	1.661	0.000287661	0.00304206	up	SMEL3Ch01	17146459	17150049	+	SMEL_001g130020.1.01	--	K13254 spastin [EC:3.6.4.3] | (RefSeq) ATPase family AAA domain-containing protein 1-A-like (A)	AAA+ ATPase domain-containing protein [Cynara cardunculus var. scolymus]	RecName: Full=Katanin p60 ATPase-containing subunit A1 {ECO:0000255|HAMAP-Rule:MF_03023}; Short=Katanin p60 subunit A1 {ECO:0000255|HAMAP-Rule:MF_03023}; EC=3.6.4.3 {ECO:0000255|HAMAP-Rule:MF_03023}; AltName: Full=CAD ATPase; AltName: Full=Katanin-1; Short=Atp60; AltName: Full=Protein BOTERO 1; AltName: Full=Protein ECTOPIC ROOT HAIR 3; AltName: Full=Protein FAT ROOT; AltName: Full=Protein FRAGIL…	SubName: Full=AAA+ ATPase domain-containing protein {ECO:0000313|EMBL:KVH91805.1};	AAA+-type ATPase	GO:0008352,katanin complex; GO:0005874,microtubule; GO:0005634,nucleus; GO:0005524,ATP binding; GO:0008017,microtubule binding; GO:0008568,microtubule-severing ATPase activity; GO:0043622,cortical microtubule organization; GO:0000226,microtubule cytoskeleton organization; GO:0009825,multidimensional cell growth; GO:0009832,plant-type cell wall biogenesis; GO:0010091,trichome branching	ATPase family associated with various cellular activities (AAA)
SMEL_001g130090.1	0.89	0.94	1.32	2.45	2.56	1.34	18	21	26	46	54	25	2.207	1.142	0.0072635	0.0383473	up	SMEL3Ch01	17204392	17206869	+	SMEL_001g130090.1.01	--	K09422 transcription factor MYB, plant | (RefSeq) myb-related protein Zm38-like (A)	PREDICTED: myb-related protein Zm38-like [Solanum tuberosum]	RecName: Full=Transcription factor MYB41 {ECO:0000305}; AltName: Full=Myb-related protein 41 {ECO:0000303|PubMed:11597504}; Short=AtMYB41 {ECO:0000303|PubMed:11597504}; AltName: Full=Protein LATE MERISTEM IDENTITY 2;	SubName: Full=Uncharacterized protein {ECO:0000313|EnsemblPlants:PGSC0003DMT400000094};	Transcription factor, Myb superfamily	GO:0005634,nucleus; GO:0003700,DNA-binding transcription factor activity; GO:0000981,DNA-binding transcription factor activity, RNA polymerase II-specific; GO:0043565,sequence-specific DNA binding; GO:0001135,RNA polymerase II transcription regulator recruiting activity; GO:0044212,transcription regulatory region DNA binding; GO:0030154,cell differentiation; GO:0009908,flower development; GO:0009…	Myb-like DNA-binding domain
SMEL_001g130150.1	6.26	5.34	0.55	0.35	0.41	0	58	55	5	3	4	0	0.071	-3.812	0.000162558	0.0019367	down	SMEL3Ch01	17243204	17243773	+	SMEL_001g130150.1.01	--	K04733 interleukin-1 receptor-associated kinase 4 [EC:2.7.11.1] | (RefSeq) LEAF RUST 10 DISEASE-RESISTANCE LOCUS RECEPTOR-LIKE PROTEIN KINASE-like 2.5 (A)	PREDICTED: putative ripening-related protein 1 isoform X1 [Solanum tuberosum]	RecName: Full=Putative ripening-related protein 2; Flags: Precursor;	SubName: Full=Uncharacterized protein {ECO:0000313|EnsemblPlants:PGSC0003DMT400000107};	--	GO:0005576,extracellular region	Lytic transglycolase
SMEL_001g130230.1	7.87	7.22	5.28	2.15	2.87	2.11	149	152	98	38	57	37	0.39	-1.36	6.24039e-07	1.73343e-05	down	SMEL3Ch01	17300581	17303624	-	SMEL_001g130230.1.01	--	K15095 (+)-neomenthol dehydrogenase [EC:1.1.1.208] | (RefSeq) (+)-neomenthol dehydrogenase-like (A)	PREDICTED: (+)-neomenthol dehydrogenase-like [Capsicum annuum]	RecName: Full=(+)-neomenthol dehydrogenase; EC=1.1.1.208; AltName: Full=Menthone:neomenthol reductase 1; Short=CaMNR1;	SubName: Full=(+)-neomenthol dehydrogenase-like {ECO:0000313|RefSeq:XP_016538020.1};	Dehydrogenases with different specificities (related to short-chain alcohol dehydrogenases)	GO:0047501,(+)-neomenthol dehydrogenase activity; GO:0006952,defense response	short chain dehydrogenase
SMEL_001g130250.1	11.16	7.16	7.71	5.03	2.57	2.66	195	139	132	82	47	43	0.432	-1.211	0.00026247	0.00282642	down	SMEL3Ch01	17317652	17320007	-	SMEL_001g130250.1.01	--	K15095 (+)-neomenthol dehydrogenase [EC:1.1.1.208] | (RefSeq) short-chain dehydrogenase/reductase 2b-like (A)	PREDICTED: short-chain dehydrogenase/reductase 2b-like [Solanum tuberosum]	RecName: Full=(+)-neomenthol dehydrogenase {ECO:0000303|PubMed:18599651}; EC=1.1.1.- {ECO:0000269|PubMed:21169366}; EC=1.1.1.208 {ECO:0000269|PubMed:18599651}; AltName: Full=Menthone:neomenthol reductase; AltName: Full=Short-chain dehydrogenase/reductase 1; Short=AtSDR1;	SubName: Full=Uncharacterized protein {ECO:0000313|EnsemblPlants:PGSC0003DMT400000078};	Dehydrogenases with different specificities (related to short-chain alcohol dehydrogenases)	GO:0005737,cytoplasm; GO:0047501,(+)-neomenthol dehydrogenase activity; GO:0006952,defense response	short chain dehydrogenase
SMEL_001g130350.1	14.79	15.86	8.59	5.1	3.95	3.7	432	515	246	139	121	100	0.361	-1.472	8.53152e-09	4.01468e-07	down	SMEL3Ch01	17501728	17504499	+	SMEL_001g130350.1.01	--	K20495 long-chain fatty acid omega-monooxygenase [EC:1.14.13.205] | (RefSeq) cytochrome P450 704B1 (A)	PREDICTED: cytochrome P450 704C1 [Solanum lycopersicum]	RecName: Full=Cytochrome P450 704C1; EC=1.14.-.-; AltName: Full=Cytochrome P450 CYPD;	SubName: Full=Uncharacterized protein {ECO:0000313|EnsemblPlants:Solyc01g094140.2.1};	Cytochrome P450 CYP4/CYP19/CYP26 subfamilies	GO:0016021,integral component of membrane; GO:0020037,heme binding; GO:0005506,iron ion binding; GO:0004497,monooxygenase activity; GO:0016705,oxidoreductase activity, acting on paired donors, with incorporation or reduction of molecular oxygen	Cytochrome P450
SMEL_001g130360.1	2.61	2.08	1.22	0.32	0.71	0.28	70	62	32	8	20	7	0.25	-1.998	7.66078e-05	0.00104429	down	SMEL3Ch01	17505588	17508051	+	SMEL_001g130360.1.01	--	K20495 long-chain fatty acid omega-monooxygenase [EC:1.14.14.80] | (RefSeq) cytochrome P450 704B1-like (A)	PREDICTED: cytochrome P450 704C1-like isoform X1 [Solanum tuberosum]	RecName: Full=Cytochrome P450 704C1; EC=1.14.-.-; AltName: Full=Cytochrome P450 CYPD;	SubName: Full=Uncharacterized protein {ECO:0000313|EnsemblPlants:PGSC0003DMT400000430};	Cytochrome P450 CYP4/CYP19/CYP26 subfamilies	GO:0016021,integral component of membrane; GO:0020037,heme binding; GO:0005506,iron ion binding; GO:0004497,monooxygenase activity; GO:0016705,oxidoreductase activity, acting on paired donors, with incorporation or reduction of molecular oxygen	Cytochrome P450
SMEL_001g130490.1	6.33	8.81	4.91	2.63	2.07	1.75	333	515	253	129	114	85	0.355	-1.492	7.07362e-09	3.40641e-07	down	SMEL3Ch01	17730762	17734457	+	SMEL_001g130490.1.01	--	K04733 interleukin-1 receptor-associated kinase 4 [EC:2.7.11.1] | (RefSeq) receptor-like serine/threonine-protein kinase At4g25390 (A)	PREDICTED: receptor-like serine/threonine-protein kinase At2g45590 [Solanum lycopersicum]	RecName: Full=Receptor-like serine/threonine-protein kinase At2g45590; EC=2.7.11.1;	SubName: Full=Uncharacterized protein {ECO:0000313|EnsemblPlants:Solyc01g094020.2.1};	Serine/threonine protein kinase	GO:0016021,integral component of membrane; GO:0005886,plasma membrane; GO:0005524,ATP binding; GO:0004675,transmembrane receptor protein serine/threonine kinase activity; GO:0007166,cell surface receptor signaling pathway; GO:0006468,protein phosphorylation	Protein kinase domain
SMEL_001g130550.1	1.72	3.55	0.79	0.36	0.11	0.24	31	71	14	6	2	4	0.128	-2.964	7.30353e-05	0.00100422	down	SMEL3Ch01	17782971	17785201	-	SMEL_001g130550.1.01	--	K05282 gibberellin 20-oxidase [EC:1.14.11.12] | (RefSeq) gibberellin 20 oxidase 1-D-like (A)	Gibberellin 20 oxidase 3 [Capsicum annuum]	RecName: Full=Gibberellin 20 oxidase 1; EC=1.14.11.-; AltName: Full=GA 20-oxidase 1; Short=AtGA20ox1; AltName: Full=Gibberellin C-20 oxidase 1;	SubName: Full=Gibberellin 20 oxidase 3 {ECO:0000313|EMBL:PHT93425.1};	Iron/ascorbate family oxidoreductases	GO:0005737,cytoplasm; GO:0045544,gibberellin 20-oxidase activity; GO:0046872,metal ion binding; GO:0009908,flower development; GO:0009740,gibberellic acid mediated signaling pathway; GO:0009686,gibberellin biosynthetic process; GO:0048366,leaf development; GO:0009739,response to gibberellin; GO:0048575,short-day photoperiodism, flowering; GO:0009826,unidimensional cell growth	2OG-Fe(II) oxygenase superfamily
SMEL_001g130790.1	8.5	12.68	13.94	5.21	4	3.94	140	232	225	80	69	60	0.408	-1.293	8.67095e-06	0.000171021	down	SMEL3Ch01	18305020	18306246	+	SMEL_001g130790.1.01	--	K09841 xanthoxin dehydrogenase [EC:1.1.1.288] | (RefSeq) xanthoxin dehydrogenase isoform X1 (A)	PREDICTED: short-chain dehydrogenase reductase 3b-like [Nicotiana sylvestris]	RecName: Full=Short-chain dehydrogenase reductase 3b; Short=AtSDR3b; EC=1.1.1.-;	SubName: Full=short-chain dehydrogenase reductase 3b-like {ECO:0000313|RefSeq:XP_009793983.1};	Reductases with broad range of substrate specificities	GO:0016491,oxidoreductase activity	Enoyl-(Acyl carrier protein) reductase
SMEL_001g130910.1	2.88	5.88	0.5	0.68	0.27	0	41	93	7	9	4	0	0.114	-3.138	0.00155284	0.0116809	down	SMEL3Ch01	18452155	18453030	-	SMEL_001g130910.1.01	--	K09286 EREBP-like factor | (RefSeq) ethylene-responsive transcription factor RAP2-11-like (A)	PREDICTED: ethylene-responsive transcription factor ERF010-like [Solanum pennellii]	RecName: Full=Ethylene-responsive transcription factor RAP2-11; AltName: Full=Protein RELATED TO APETALA2 11;	SubName: Full=Uncharacterized protein {ECO:0000313|EnsemblPlants:Solyc01g091760.2.1};	--	GO:0005634,nucleus; GO:0003700,DNA-binding transcription factor activity; GO:0043565,sequence-specific DNA binding; GO:0035865,cellular response to potassium ion; GO:0009873,ethylene-activated signaling pathway; GO:0048528,post-embryonic root development; GO:0009723,response to ethylene; GO:0000302,response to reactive oxygen species; GO:0006351,transcription, DNA-templated	AP2 domain
SMEL_001g130990.1	32.17	24.8	56.35	97.79	102.65	79.98	615	527	1056	1744	2056	1414	2.672	1.418	1.43795e-05	0.000264976	up	SMEL3Ch01	18513510	18516568	+	SMEL_001g130990.1.01	--	K15277 solute carrier family 35 (adenosine 3'-phospho 5'-phosphosulfate transporter), member B3 | (RefSeq) UDP-galactose/UDP-glucose transporter 4-like (A)	PREDICTED: UDP-galactose/UDP-glucose transporter 4-like isoform X1 [Solanum pennellii]	RecName: Full=UDP-galactose/UDP-glucose transporter 4 {ECO:0000303|PubMed:12042319}; Short=AtUTr4 {ECO:0000303|PubMed:12042319};	SubName: Full=Uncharacterized protein {ECO:0000313|EnsemblPlants:Solyc01g091840.2.1};	UDP-galactose transporter related protein	GO:0030176,integral component of endoplasmic reticulum membrane; GO:0030173,integral component of Golgi membrane; GO:0046964,3'-phosphoadenosine 5'-phosphosulfate transmembrane transporter activity; GO:0015297,antiporter activity; GO:0008643,carbohydrate transport	UAA transporter family
SMEL_001g131020.1	45.78	34.66	52.97	21.3	14.83	19.75	940	791	1066	408	319	375	0.457	-1.129	4.62402e-06	0.000100006	down	SMEL3Ch01	18551991	18553253	+	SMEL_001g131020.1.01	--	K19519 transforming growth factor-beta-induced protein | (RefSeq) fasciclin-like arabinogalactan protein 4 (A)	PREDICTED: fasciclin-like arabinogalactan protein 10 [Solanum tuberosum]	RecName: Full=Fasciclin-like arabinogalactan protein 8; Short=AtAGP8; Flags: Precursor;	SubName: Full=Putative fasciclin-like arabinogalactan protein 10-like {ECO:0000313|EMBL:JAP26541.1};	--	GO:0031225,anchored component of membrane; GO:0046658,anchored component of plasma membrane; GO:0048046,apoplast; GO:0009505,plant-type cell wall; GO:0005886,plasma membrane	Fasciclin domain
SMEL_001g131150.1	4.27	4.42	3.7	9.24	10.61	12.02	53	61	45	107	138	138	2.846	1.509	1.8801e-09	1.05101e-07	up	SMEL3Ch01	18704635	18707416	+	SMEL_001g131150.1.01	--	K21994 LOB domain-containing protein 18 | (RefSeq) LOB domain-containing protein 19 (A)	PREDICTED: LOB domain-containing protein 19 [Solanum tuberosum]	RecName: Full=LOB domain-containing protein 31; AltName: Full=ASYMMETRIC LEAVES 2-like protein 22; Short=AS2-like protein 22;	SubName: Full=Uncharacterized protein {ECO:0000313|EnsemblPlants:Solyc01g091400.2.1};	--	--	Lateral organ boundaries (LOB) domain
SMEL_001g131750.1	11.23	10.16	6	4.85	0.95	2.99	191	192	100	77	17	47	0.354	-1.499	0.00232901	0.0160231	down	SMEL3Ch01	19617200	19619181	-	SMEL_001g131750.1.01	--	K20628 expansin | (RefSeq) putative expansin-B2 (A)	PREDICTED: expansin-B15-like [Capsicum annuum]	RecName: Full=Putative expansin-B2; Short=At-EXPB2; Short=AtEXPB2; AltName: Full=Ath-ExpBeta-1.4; AltName: Full=Beta-expansin-2; Flags: Precursor;	SubName: Full=expansin-B15-like {ECO:0000313|RefSeq:XP_016557643.1};	--	GO:0005618,cell wall; GO:0005576,extracellular region; GO:0016020,membrane; GO:0009828,plant-type cell wall loosening; GO:0019953,sexual reproduction; GO:0009826,unidimensional cell growth	Pollen allergen
SMEL_001g131760.1	37.46	41.45	21.72	12.02	9.07	10.72	461	567	262	138	117	122	0.351	-1.509	4.37756e-09	2.25002e-07	down	SMEL3Ch01	19639098	19640272	-	SMEL_001g131760.1.01	--	K01255 leucyl aminopeptidase [EC:3.4.11.1] | (RefSeq) leucyl aminopeptidase (A)	PREDICTED: cyclin-U2-2 [Solanum tuberosum]	RecName: Full=Cyclin-U2-2; Short=CycU2;2; AltName: Full=Cyclin-P3.2; Short=CycP3;2;	SubName: Full=Uncharacterized protein {ECO:0000313|EnsemblPlants:PGSC0003DMT400066949};	Cyclin	GO:0019901,protein kinase binding; GO:0007049,cell cycle; GO:0051301,cell division; GO:0000079,regulation of cyclin-dependent protein serine/threonine kinase activity	Cyclin
SMEL_001g131920.1	16.14	15.51	10.16	2.63	1.56	1.39	514	549	317	78	52	41	0.147	-2.765	3.65907e-23	2.0383e-20	down	SMEL3Ch01	19873334	19879544	-	SMEL_001g131920.1.01	--	K17912 9-cis-beta-carotene 9',10'-cleaving dioxygenase [EC:1.13.11.68] | (RefSeq) carotenoid cleavage dioxygenase 7, chloroplastic (A)	PREDICTED: carotenoid cleavage dioxygenase 7, chloroplastic [Solanum tuberosum]	RecName: Full=Carotenoid cleavage dioxygenase 7, chloroplastic; Short=AtCCD7; AltName: Full=AtNCED7; AltName: Full=Beta,beta-carotene 9',10'-oxygenase; EC=1.13.11.68; AltName: Full=Protein MORE AXILLARY BRANCHING 3; AltName: Full=Protein MORE AXILLARY GROWTH 3; Flags: Precursor;	SubName: Full=Uncharacterized protein {ECO:0000313|EnsemblPlants:PGSC0003DMT400066965};	Beta, beta-carotene 15,15'-dioxygenase and related enzymes	GO:0009507,chloroplast; GO:0102395,9-cis-beta-carotene 9',10'-cleavage oxygenase activity; GO:0046872,metal ion binding; GO:0016702,oxidoreductase activity, acting on single donors with incorporation of molecular oxygen, incorporation of two atoms of oxygen; GO:0016121,carotene catabolic process; GO:0010223,secondary shoot formation; GO:1901601,strigolactone biosynthetic process	Retinal pigment epithelial membrane protein
SMEL_001g131950.1	71.38	65.33	47.96	30.71	20.2	23.55	1403	1427	924	563	416	428	0.446	-1.166	8.97377e-09	4.18458e-07	down	SMEL3Ch01	19931155	19933408	-	SMEL_001g131950.1.01	--	K04125 gibberellin 2beta-dioxygenase [EC:1.14.11.13] | (RefSeq) gibberellin 2-beta-dioxygenase 8-like (A)	PREDICTED: probable 2-oxoglutarate-dependent dioxygenase AOP1 [Solanum tuberosum]	RecName: Full=Probable 2-oxoglutarate-dependent dioxygenase AOP1.2; EC=1.14.11.-;	SubName: Full=Uncharacterized protein {ECO:0000313|EnsemblPlants:PGSC0003DMT400066971};	Iron/ascorbate family oxidoreductases	GO:0051213,dioxygenase activity; GO:0046872,metal ion binding	2OG-Fe(II) oxygenase superfamily
SMEL_001g131960.1	1.34	1.61	1.02	0.37	0.14	0.27	27	36	20	7	3	5	0.216	-2.212	0.000186795	0.00215327	down	SMEL3Ch01	19940448	19942099	+	SMEL_001g131960.1.01	--	K08176 MFS transporter, PHS family, inorganic phosphate transporter | (RefSeq) probable inorganic phosphate transporter 1-3 (A)	PREDICTED: type III polyketide synthase A [Solanum tuberosum]	RecName: Full=Type III polyketide synthase A {ECO:0000303|PubMed:19043200}; Short=PKS-A; EC=2.3.1.- {ECO:0000305|PubMed:19043200}; AltName: Full=Hydroxyalkyl alpha-pyrone synthase PKS-A {ECO:0000303|PubMed:21193570}; AltName: Full=Protein LESS ADHESIVE POLLEN 6 {ECO:0000303|PubMed:20442277};	SubName: Full=Uncharacterized protein {ECO:0000313|EnsemblPlants:PGSC0003DMT400095725};	--	GO:0005783,endoplasmic reticulum; GO:0090439,tetraketide alpha-pyrone synthase activity; GO:0009813,flavonoid biosynthetic process; GO:0010584,pollen exine formation; GO:0030639,polyketide biosynthetic process; GO:0080110,sporopollenin biosynthetic process	Chalcone and stilbene synthases, N-terminal domain
SMEL_001g132170.1	27.68	23.29	14.85	7.09	2.62	3.27	293	274	154	70	29	32	0.217	-2.205	8.82478e-09	4.14323e-07	down	SMEL3Ch01	20253216	20253866	+	SMEL_001g132170.1.01	--	K14517 ethylene-responsive transcription factor 2 | (RefSeq) ethylene-responsive transcription factor 2-like (A)	PREDICTED: ethylene-responsive transcription factor 1 [Solanum lycopersicum]	RecName: Full=Ethylene-responsive transcription factor 13; Short=AtERF13; AltName: Full=Ethylene-responsive element-binding factor 13; Short=EREBP-13;	SubName: Full=Putative ethylene-responsive transcription factor 1-like {ECO:0000313|EMBL:JAP18379.1};	--	GO:0005634,nucleus; GO:0003677,DNA binding; GO:0003700,DNA-binding transcription factor activity; GO:0043565,sequence-specific DNA binding; GO:0006952,defense response; GO:0009873,ethylene-activated signaling pathway; GO:0010200,response to chitin; GO:0006351,transcription, DNA-templated	AP2 domain
SMEL_001g132230.1	8.46	9.08	6.24	3.8	2.36	2.3	394	470	285	165	115	99	0.391	-1.353	2.55513e-08	1.07917e-06	down	SMEL3Ch01	20459759	20463905	-	SMEL_001g132230.1.01	--	K08286 protein-serine/threonine kinase [EC:2.7.11.-] | (RefSeq) serine/threonine-protein kinase D6PKL2 (A)	PREDICTED: serine/threonine-protein kinase D6PK [Solanum pennellii]	RecName: Full=Serine/threonine-protein kinase D6PKL2; EC=2.7.11.1; AltName: Full=D6 protein kinase-like 2; AltName: Full=Serine/threonine-protein kinase AtPK5;	SubName: Full=AvrPto-dependent Pto-interacting protein 3 {ECO:0000313|EMBL:AAW38935.1, ECO:0000313|EnsemblPlants:Solyc01g090240.2.1};	Putative serine/threonine protein kinase	GO:0005737,cytoplasm; GO:0005730,nucleolus; GO:0005634,nucleus; GO:0005886,plasma membrane; GO:0005524,ATP binding; GO:0016301,kinase activity; GO:0004672,protein kinase activity; GO:0004674,protein serine/threonine kinase activity; GO:0009734,auxin-activated signaling pathway; GO:0010540,basipetal auxin transport; GO:0035556,intracellular signal transduction; GO:0006468,protein phosphorylation	Protein kinase domain
SMEL_001g132400.1	2.07	2.15	3.24	3.01	6.98	9.35	45	52	69	61	159	188	2.861	1.516	0.000811079	0.00690506	up	SMEL3Ch01	20680599	20683004	-	SMEL_001g132400.1.01	--	K06892 feruloyl-CoA 6-hydroxylase [EC:1.14.11.61] | (RefSeq) 2-oxoglutarate-Iron(II)-dependent oxygenase (A)	PREDICTED: protein SRG1-like [Solanum pennellii]	RecName: Full=Flavanone 3-dioxygenase 3 {ECO:0000305}; EC=1.14.11.9 {ECO:0000269|PubMed:18413994}; AltName: Full=Flavanone 3-beta-hydroxylase 3 {ECO:0000305}; AltName: Full=Flavanone 3-hydroxylase 3 {ECO:0000303|PubMed:18413994}; Short=OsF3H-3 {ECO:0000303|PubMed:18413994}; AltName: Full=Flavonoid 3-hydroxylase {ECO:0000303|PubMed:18726614}; Short=OsF3H {ECO:0000303|PubMed:18726614};	SubName: Full=Protein dmr6-like oxygenase 2 {ECO:0000313|EMBL:OIT07810.1};	Iron/ascorbate family oxidoreductases	GO:0031418,L-ascorbic acid binding; GO:0046872,metal ion binding; GO:0045486,naringenin 3-dioxygenase activity; GO:0009813,flavonoid biosynthetic process	non-haem dioxygenase in morphine synthesis N-terminal
SMEL_001g132420.1	1.95	3.07	7.75	1.25	0.65	1.05	20	35	78	12	7	10	0.247	-2.018	0.00208497	0.0147421	down	SMEL3Ch01	20695901	20696630	-	SMEL_001g132420.1.01	--	--	PREDICTED: uncharacterized protein LOC107857218 [Capsicum annuum]	--	SubName: Full=uncharacterized protein LOC107857218 {ECO:0000313|RefSeq:XP_016557639.1};	--	--	--
SMEL_001g132430.1	0.72	2.08	3.69	0.15	0.34	0.55	10	32	50	2	5	7	0.175	-2.516	0.00161451	0.0120263	down	SMEL3Ch01	20699034	20701112	-	SMEL_001g132430.1.01	--	--	PREDICTED: uncharacterized protein LOC109221193 isoform X2 [Nicotiana attenuata]	--	SubName: Full=Uncharacterized protein {ECO:0000313|EMBL:OIT19649.1};	--	--	--
SMEL_001g132690.1	2.68	2.84	4.42	8.1	9.32	9.44	39	46	63	110	142	127	2.962	1.567	3.13433e-07	9.51422e-06	up	SMEL3Ch01	20933501	20934463	-	SMEL_001g132690.1.01	--	K21435 ankyrin repeat domain-containing protein 6 | (RefSeq) ankyrin repeat-containing protein ITN1-like (A)	hypothetical protein BC332_03023 [Capsicum chinense]	--	SubName: Full=Uncharacterized protein {ECO:0000313|EMBL:PHU30930.1};	FOG: Ankyrin repeat	--	Domain of unknown function
SMEL_001g132720.1	3.06	4.28	6.71	13.96	18.83	18.37	47	73	101	200	303	261	3.976	1.991	5.61238e-09	2.77402e-07	up	SMEL3Ch01	20943043	20945034	-	SMEL_001g132720.1.01	--	K21435 ankyrin repeat domain-containing protein 6 | (RefSeq) ankyrin repeat-containing protein ITN1-like (A)	PREDICTED: ankyrin repeat-containing protein At2g01680-like [Solanum tuberosum]	--	SubName: Full=Uncharacterized protein {ECO:0000313|EnsemblPlants:PGSC0003DMT400080032};	FOG: Ankyrin repeat	GO:0016021,integral component of membrane	Domain of unknown function
SMEL_001g132780.1	3.46	3.55	2.92	1.66	0.97	1.42	58	66	48	26	17	22	0.448	-1.159	0.000924081	0.00769545	down	SMEL3Ch01	20971914	20975699	-	SMEL_001g132780.1.01	--	K04392 Ras-related C3 botulinum toxin substrate 1 | (RefSeq) rac-like GTP-binding protein 5 (A)	PREDICTED: rac-like GTP-binding protein 5 [Capsicum annuum]	RecName: Full=Rac-like GTP-binding protein ARAC3; AltName: Full=GTPase protein ROP6; Flags: Precursor;	SubName: Full=rac-like GTP-binding protein 5 {ECO:0000313|RefSeq:XP_016557617.1};	Ras-related small GTPase, Rho type	GO:0005737,cytoplasm; GO:0005730,nucleolus; GO:0005634,nucleus; GO:0005886,plasma membrane; GO:0030427,site of polarized growth; GO:0005819,spindle; GO:0019003,GDP binding; GO:0005525,GTP binding; GO:0003924,GTPase activity; GO:0009734,auxin-activated signaling pathway; GO:0009958,positive gravitropism; GO:0010928,regulation of auxin mediated signaling pathway; GO:0007264,small GTPase mediated si…	Ras family
SMEL_001g132920.1	34.32	11.23	24.1	1.43	0	0.96	77	28	53	3	0	2	0.037	-4.768	2.18887e-08	9.37936e-07	down	SMEL3Ch01	21125996	21126133	+	SMEL_001g132920.1.01	--	--	PREDICTED: uncharacterized protein LOC102593257 [Solanum tuberosum]	--	SubName: Full=Putative ovule protein {ECO:0000313|EMBL:JAP34691.1};	--	--	--
SMEL_001g133470.1	4.91	3.99	3.14	2.04	0.87	0.96	233	210	146	90	43	42	0.352	-1.508	1.38169e-05	0.000255868	down	SMEL3Ch01	22446800	22449715	+	SMEL_001g133470.1.01	--	K13457 disease resistance protein RPM1 | (RefSeq) disease resistance protein RPM1-like (A)	PREDICTED: disease resistance protein RPM1-like isoform X1 [Solanum pennellii]	RecName: Full=Disease resistance protein RPM1; AltName: Full=Resistance to Pseudomonas syringae protein 3;	SubName: Full=Uncharacterized protein {ECO:0000313|EnsemblPlants:Solyc01g086810.2.1};	Apoptotic ATPase	GO:0012505,endomembrane system; GO:0019897,extrinsic component of plasma membrane; GO:0005886,plasma membrane; GO:0043531,ADP binding; GO:0005524,ATP binding; GO:0000166,nucleotide binding; GO:0009626,plant-type hypersensitive response; GO:0007165,signal transduction	NB-ARC domain
SMEL_001g133700.1	61.51	82.51	85.25	29.16	32.95	37.22	597	890	811	264	335	334	0.476	-1.071	1.68307e-06	4.11991e-05	down	SMEL3Ch01	22837792	22838388	+	SMEL_001g133700.1.01	--	K11253 histone H3 | (RefSeq) histone H3.2 (A)	PREDICTED: histone H3.2 [Musa acuminata subsp. malaccensis]	RecName: Full=Histone H3.2;	RecName: Full=Histone H3 {ECO:0000256|RuleBase:RU004471};	Histones H3 and H4	GO:0000786,nucleosome; GO:0005634,nucleus; GO:0003677,DNA binding; GO:0046982,protein heterodimerization activity	Core histone H2A/H2B/H3/H4
SMEL_001g133720.1	0.35	0.39	0.23	0.02	0.02	0.04	20	25	13	1	1	2	0.082	-3.6	8.33672e-05	0.00112013	down	SMEL3Ch01	22855459	22860372	-	SMEL_001g133720.1.01	--	K13457 disease resistance protein RPM1 | (RefSeq) disease resistance protein RPM1-like (A)	PREDICTED: disease resistance protein RPM1-like isoform X1 [Solanum pennellii]	RecName: Full=Disease resistance protein RPM1; AltName: Full=Resistance to Pseudomonas syringae protein 3;	SubName: Full=Uncharacterized protein {ECO:0000313|EnsemblPlants:PGSC0003DMT400065023};	Apoptotic ATPase	GO:0012505,endomembrane system; GO:0019897,extrinsic component of plasma membrane; GO:0005886,plasma membrane; GO:0043531,ADP binding; GO:0005524,ATP binding; GO:0000166,nucleotide binding; GO:0009626,plant-type hypersensitive response; GO:0007165,signal transduction	NB-ARC domain
SMEL_001g133960.1	28.13	28.38	22.89	13.33	10.34	9.43	810	908	646	358	312	251	0.459	-1.123	2.03387e-11	1.70407e-09	down	SMEL3Ch01	23320474	23323814	+	SMEL_001g133960.1.01	--	--	PREDICTED: major facilitator superfamily domain-containing protein 12-like [Solanum tuberosum]	--	SubName: Full=Uncharacterized protein {ECO:0000313|EnsemblPlants:Solyc01g073670.2.1};	Predicted sugar transporter	GO:0016021,integral component of membrane	MFS/sugar transport protein
SMEL_001g134030.1	1.75	2.75	0.6	0.3	0.59	0.48	51	89	17	8	18	13	0.303	-1.721	0.00391035	0.0239371	down	SMEL3Ch01	23423972	23426426	-	SMEL_001g134030.1.01	--	K13217 pre-mRNA-processing factor 39 | (RefSeq) hypothetical protein (A)	PREDICTED: uncharacterized protein LOC102589484 [Solanum tuberosum]	--	SubName: Full=Uncharacterized protein {ECO:0000313|EnsemblPlants:PGSC0003DMT400079894};	--	--	Vacuolar protein sorting-associated protein 62
SMEL_001g134650.1	26.38	23.03	49.59	42.33	67.27	77.2	842	817	1551	1260	2249	2278	2.053	1.038	0.00484795	0.0282903	up	SMEL3Ch01	24228988	24238384	+	SMEL_001g134650.1.01	--	K03639 GTP 3',8-cyclase [EC:4.1.99.22] | (RefSeq) cyclic pyranopterin monophosphate synthase, mitochondrial (A)	PREDICTED: cyclic pyranopterin monophosphate synthase, mitochondrial [Solanum tuberosum]	RecName: Full=GTP 3',8-cyclase, mitochondrial; EC=4.1.99.22 {ECO:0000250|UniProtKB:P69848}; AltName: Full=Molybdenum cofactor biosynthesis enzyme CNX2; AltName: Full=Molybdopterin biosynthesis protein CNX2; AltName: Full=Molybdopterin precursor Z synthase; Flags: Precursor;	SubName: Full=Putative cyclic pyranopterin monophosphate synthase, mitochondrial-like {ECO:0000313|EMBL:JAP30158.1};	Molybdenum cofactor biosynthesis pathway protein	GO:0009507,chloroplast; GO:0005759,mitochondrial matrix; GO:0005739,mitochondrion; GO:0019008,molybdopterin synthase complex; GO:0051539,4 iron, 4 sulfur cluster binding; GO:0061798,GTP 3',8'-cyclase activity; GO:0005525,GTP binding; GO:0046872,metal ion binding; GO:0006777,Mo-molybdopterin cofactor biosynthetic process	Molybdenum Cofactor Synthesis C
SMEL_001g134660.1	4.49	4.38	1.31	3.71	5.87	21.34	35	38	10	27	48	154	3.468	1.794	0.00903103	0.0451596	up	SMEL3Ch01	24256494	24256973	-	SMEL_001g134660.1.01	--	--	hypothetical protein BC332_02797 [Capsicum chinense]	--	SubName: Full=Uncharacterized protein {ECO:0000313|EMBL:PHU30704.1};	--	--	VQ motif
SMEL_001g134740.1	16.72	17.55	15.19	4.88	2.81	6.79	301	351	268	82	53	113	0.323	-1.629	2.08744e-07	6.61911e-06	down	SMEL3Ch01	24386682	24387788	-	SMEL_001g134740.1.01	--	K13420 LRR receptor-like serine/threonine-protein kinase FLS2 [EC:2.7.11.1] | (RefSeq) putative receptor-like protein kinase At3g47110 (A)	PREDICTED: DNA-damage-repair/toleration protein DRT100-like [Solanum lycopersicum]	RecName: Full=DNA damage-repair/toleration protein DRT100; Flags: Precursor;	SubName: Full=Uncharacterized protein {ECO:0000313|EnsemblPlants:PGSC0003DMT400017733};	FOG: Leucine rich repeat	GO:0009507,chloroplast; GO:0000166,nucleotide binding; GO:0006281,DNA repair	Leucine rich repeat
SMEL_001g134770.1	56.62	71.56	70.33	110.2	236.96	301.27	1540	2163	1875	2796	6752	7577	3.624	1.858	1.15059e-07	3.9328e-06	up	SMEL3Ch01	24434956	24437433	+	SMEL_001g134770.1.01	--	K18878 BHLH transcription factor Upa20 | (RefSeq) Upa20; transcription factor bHLH137-like (A)	PREDICTED: transcription factor bHLH130-like [Solanum lycopersicum]	RecName: Full=Transcription factor bHLH130; AltName: Full=Basic helix-loop-helix protein 130; Short=AtbHLH130; Short=bHLH 130; AltName: Full=Transcription factor EN 69; AltName: Full=bHLH transcription factor bHLH130;	SubName: Full=Putative transcription factor bHLH-like {ECO:0000313|EMBL:JAP28611.1};	--	GO:0005634,nucleus; GO:0001046,core promoter sequence-specific DNA binding; GO:0003700,DNA-binding transcription factor activity; GO:0046983,protein dimerization activity; GO:0001228,DNA-binding transcription activator activity, RNA polymerase II-specific; GO:0048573,photoperiodism, flowering; GO:0006355,regulation of transcription, DNA-templated; GO:0006366,transcription by RNA polymerase II	Helix-loop-helix DNA-binding domain
SMEL_001g134800.1	7.69	7.99	13.27	3.86	3.65	3.61	603	696	1020	282	300	262	0.417	-1.262	6.15013e-06	0.000127912	down	SMEL3Ch01	24521585	24528576	+	SMEL_001g134800.1.01	--	K03164 DNA topoisomerase II [EC:5.99.1.3] | (RefSeq) DNA topoisomerase 2 (A)	PREDICTED: DNA topoisomerase 2 isoform X1 [Solanum tuberosum]	RecName: Full=DNA topoisomerase 2; EC=5.99.1.3; AltName: Full=DNA topoisomerase II;	RecName: Full=DNA topoisomerase 2 {ECO:0000256|RuleBase:RU362094}; EC=5.99.1.3 {ECO:0000256|RuleBase:RU362094};	DNA topoisomerase type II	GO:0005634,nucleus; GO:0005524,ATP binding; GO:0003677,DNA binding; GO:0003916,DNA topoisomerase activity; GO:0003918,DNA topoisomerase type II (ATP-hydrolyzing) activity; GO:0046872,metal ion binding; GO:0006265,DNA topological change; GO:0044774,mitotic DNA integrity checkpoint; GO:0000712,resolution of meiotic recombination intermediates; GO:0000819,sister chromatid segregation	DNA gyrase/topoisomerase IV, subunit A
SMEL_001g135050.1	13.23	7.45	3.92	20.57	81.08	49.15	131	82	38	190	841	450	6.93	2.793	4.70964e-08	1.81102e-06	up	SMEL3Ch01	25040425	25041780	+	SMEL_001g135050.1.01	--	--	PREDICTED: uncharacterized protein LOC102591434 [Solanum tuberosum]	--	SubName: Full=Uncharacterized protein {ECO:0000313|EnsemblPlants:PGSC0003DMT400017543};	SAP family cell cycle dependent phosphatase-associated protein	--	--
SMEL_001g135070.1	5.26	5.81	5.97	2.5	1.81	2.76	194	238	216	86	70	94	0.455	-1.136	2.64964e-06	6.13615e-05	down	SMEL3Ch01	25070690	25082638	-	SMEL_001g135070.1.01	--	K20456 oxysterol-binding protein 1 | (RefSeq) hypothetical protein (A)	PREDICTED: protein DETOXIFICATION 43-like [Solanum tuberosum]	RecName: Full=Protein DETOXIFICATION 43 {ECO:0000303|PubMed:11739388}; Short=AtDTX43 {ECO:0000303|PubMed:11739388}; AltName: Full=Multidrug and toxic compound extrusion protein 43 {ECO:0000305}; Short=MATE protein 43 {ECO:0000305}; AltName: Full=Protein FERRIC REDUCTASE DEFECTIVE 3 {ECO:0000303|PubMed:12172022}; Short=AtFRD3 {ECO:0000303|PubMed:12172022}; AltName: Full=Protein MANGANESE ACCUMULAT…	RecName: Full=Protein DETOXIFICATION {ECO:0000256|RuleBase:RU004914}; AltName: Full=Multidrug and toxic compound extrusion protein {ECO:0000256|RuleBase:RU004914};	Uncharacterized membrane protein, predicted efflux pump	GO:0016021,integral component of membrane; GO:0005886,plasma membrane; GO:0015297,antiporter activity; GO:0015137,citrate transmembrane transporter activity; GO:0015238,drug transmembrane transporter activity; GO:0046873,metal ion transmembrane transporter activity; GO:0005215,transporter activity; GO:0006879,cellular iron ion homeostasis; GO:0071369,cellular response to ethylene stimulus; GO:007…	MatE
SMEL_001g135160.1	2.75	3.2	3.96	0.55	0.59	0.99	75	97	106	14	17	25	0.236	-2.083	6.42568e-08	2.36078e-06	down	SMEL3Ch01	25192743	25195754	-	SMEL_001g135160.1.01	--	--	PREDICTED: LOW QUALITY PROTEIN: uncharacterized protein LOC107003424 [Solanum pennellii]	--	SubName: Full=Uncharacterized protein {ECO:0000313|EnsemblPlants:Solyc01g087080.2.1};	--	--	--
SMEL_001g135240.1	59.79	175.33	58.45	16.61	20.47	19.13	382	1245	366	99	137	113	0.214	-2.223	5.11228e-08	1.94303e-06	down	SMEL3Ch01	25323640	25324108	-	SMEL_001g135240.1.01	--	K13993 HSP20 family protein | (RefSeq) 18.2 kDa class I heat shock protein-like (A)	PREDICTED: 18.2 kDa class I heat shock protein-like [Solanum tuberosum]	RecName: Full=17.8 kDa class I heat shock protein; AltName: Full=Clone DCHSP17.7;	SubName: Full=Uncharacterized protein {ECO:0000313|EnsemblPlants:PGSC0003DMT400007587};	Molecular chaperone (small heat-shock protein Hsp26/Hsp42)	GO:0005737,cytoplasm	Hsp20/alpha crystallin family
SMEL_001g135440.1	0.17	0.16	0	0.83	1.48	0.56	2	2	0	9	18	6	9.68	3.275	0.00199117	0.0142155	up	SMEL3Ch01	25995927	25997475	+	SMEL_001g135440.1.01	--	K14611 solute carrier family 23 (nucleobase transporter), member 1/2 | (RefSeq) nucleobase-ascorbate transporter 3-like (A)	PREDICTED: uncharacterized protein LOC101261159 [Solanum lycopersicum]	RecName: Full=Lactoylglutathione lyase; EC=4.4.1.5; AltName: Full=Aldoketomutase; AltName: Full=Glyoxalase I; Short=Glx I; AltName: Full=Ketone-aldehyde mutase; AltName: Full=Methylglyoxalase; AltName: Full=S-D-lactoylglutathione methylglyoxal lyase;	SubName: Full=Uncharacterized protein {ECO:0000313|EnsemblPlants:Solyc01g088010.1.1};	--	GO:0004462,lactoylglutathione lyase activity; GO:0046872,metal ion binding; GO:0009651,response to salt stress; GO:0009414,response to water deprivation	Glyoxalase/Bleomycin resistance protein/Dioxygenase superfamily
SMEL_001g135570.1	23.99	25.23	63.21	48.53	97.85	101.21	653	763	1686	1232	2790	2547	2.384	1.253	0.00477819	0.0279702	up	SMEL3Ch01	26289986	26298174	-	SMEL_001g135570.1.01	--	K00006 glycerol-3-phosphate dehydrogenase (NAD+) [EC:1.1.1.8] | (RefSeq) probable glycerol-3-phosphate dehydrogenase [NAD(+)] 1, cytosolic (A)	PREDICTED: probable glycerol-3-phosphate dehydrogenase [NAD(+)]	RecName: Full=Probable glycerol-3-phosphate dehydrogenase [NAD(+)] 1, cytosolic; EC=1.1.1.8;	RecName: Full=Glycerol-3-phosphate dehydrogenase [NAD(+)] {ECO:0000256|RuleBase:RU361243}; EC=1.1.1.8 {ECO:0000256|RuleBase:RU361243};	Glycerol-3-phosphate dehydrogenase/dihydroxyacetone 3-phosphate reductase	GO:0005829,cytosol; GO:0009331,glycerol-3-phosphate dehydrogenase complex; GO:0004367,glycerol-3-phosphate dehydrogenase [NAD+] activity; GO:0051287,NAD binding; GO:0005975,carbohydrate metabolic process; GO:0046168,glycerol-3-phosphate catabolic process	NAD-dependent glycerol-3-phosphate dehydrogenase C-terminus
SMEL_001g135900.1	1.43	0.89	1	0.19	0.09	0.19	16	11	11	2	1	2	0.155	-2.693	0.00313507	0.0200923	down	SMEL3Ch01	27198749	27202006	+	SMEL_001g135900.1.01	--	--	Protein trichome birefringence-like 41 [Capsicum baccatum]	RecName: Full=Protein trichome birefringence-like 38;	SubName: Full=Protein trichome birefringence-like 41 {ECO:0000313|EMBL:PHT59748.1};	--	GO:0005794,Golgi apparatus; GO:0016021,integral component of membrane; GO:0016413,O-acetyltransferase activity; GO:0071554,cell wall organization or biogenesis	GDSL/SGNH-like Acyl-Esterase family found in Pmr5 and Cas1p
SMEL_001g136090.1	11.06	4.07	5.26	11.25	13.41	15.25	193	79	90	183	245	246	2.179	1.124	0.00232689	0.0160185	up	SMEL3Ch01	27500140	27506986	+	SMEL_001g136090.1.01	--	--	hypothetical protein A4A49_17086 [Nicotiana attenuata]	--	SubName: Full=Uncharacterized protein {ECO:0000313|EMBL:OIT06644.1};	--	--	Inositol hexakisphosphate
SMEL_001g136240.1	1.62	2.22	3.49	1.4	0.71	0.84	46	70	97	37	21	22	0.433	-1.208	0.00702651	0.0374511	down	SMEL3Ch01	27687140	27690739	+	SMEL_001g136240.1.01	--	K20027 palmitoyltransferase ZDHHC1/11 [EC:2.3.1.225] | (RefSeq) protein S-acyltransferase 18 (A)	PREDICTED: protein S-acyltransferase 18 [Solanum tuberosum]	RecName: Full=Protein S-acyltransferase 18; EC=2.3.1.225; AltName: Full=Probable palmitoyltransferase At4g01730; AltName: Full=Zinc finger DHHC domain-containing protein At4g01730;	RecName: Full=S-acyltransferase {ECO:0000256|RuleBase:RU079119}; EC=2.3.1.225 {ECO:0000256|RuleBase:RU079119}; AltName: Full=Palmitoyltransferase {ECO:0000256|RuleBase:RU079119};	DHHC-type Zn-finger proteins	GO:0030659,cytoplasmic vesicle membrane; GO:0005789,endoplasmic reticulum membrane; GO:0016021,integral component of membrane; GO:0019706,protein-cysteine S-palmitoyltransferase activity	DHHC palmitoyltransferase
SMEL_001g136480.1	38.35	44.33	52.42	66.12	80.76	98.85	689	885	923	1108	1520	1642	2	1	3.29651e-05	0.000523052	up	SMEL3Ch01	28144460	28147278	-	SMEL_001g136480.1.01	--	K12835 ATP-dependent RNA helicase DDX42 [EC:3.6.4.13] | (RefSeq) DEAD-box ATP-dependent RNA helicase 24 isoform X1 (A)	WRKY transcription factor 4 [Solanum tuberosum]	RecName: Full=Probable WRKY transcription factor 23; AltName: Full=WRKY DNA-binding protein 23;	SubName: Full=WRKY transcription factor 4 {ECO:0000313|EMBL:ABU49723.1};	--	GO:0005634,nucleus; GO:0003700,DNA-binding transcription factor activity; GO:0043565,sequence-specific DNA binding; GO:0009733,response to auxin; GO:0009624,response to nematode; GO:0006351,transcription, DNA-templated	WRKY DNA -binding domain
SMEL_001g136860.1	2.03	1.07	3.98	4.18	12.45	9.16	12	7	23	23	77	50	3.996	1.999	0.00114422	0.00917291	up	SMEL3Ch01	29055851	29056213	+	SMEL_001g136860.1.01	--	--	PREDICTED: calvin cycle protein CP12-1, chloroplastic [Solanum tuberosum]	RecName: Full=Calvin cycle protein CP12-2, chloroplastic; AltName: Full=CP12 domain-containing protein 2; AltName: Full=Chloroplast protein 12-2; Flags: Precursor;	SubName: Full=Uncharacterized protein {ECO:0000313|EnsemblPlants:PGSC0003DMT400023336};	--	GO:0009507,chloroplast; GO:0009570,chloroplast stroma; GO:0043234,NA; GO:0099080,supramolecular complex; GO:0005507,copper ion binding; GO:0019899,enzyme binding; GO:0016151,nickel cation binding; GO:0030674,protein binding, bridging; GO:0032403,NA; GO:0071454,cellular response to anoxia; GO:0070417,cellular response to cold; GO:0034605,cellular response to heat; GO:0080153,negative regulation of…	CP12 domain
SMEL_001g137420.1	25.69	22.04	58.88	61.2	81.67	77.14	581	554	1305	1291	1935	1613	2.225	1.154	0.00303185	0.019622	up	SMEL3Ch01	30622412	30625834	+	SMEL_001g137420.1.01	--	K19043 E3 ubiquitin-protein ligase RHF [EC:2.3.2.27] | (RefSeq) E3 ubiquitin-protein ligase RHF1A-like (A)	PREDICTED: E3 ubiquitin-protein ligase RHF1A-like [Solanum pennellii]	RecName: Full=E3 ubiquitin-protein ligase RHF2A {ECO:0000305}; EC=2.3.2.27; AltName: Full=RING-H2 finger F2a {ECO:0000303|PubMed:9781696}; AltName: Full=RING-H2 zinc finger protein RHF2a {ECO:0000305}; AltName: Full=RING-type E3 ubiquitin transferase RHF2A {ECO:0000305};	SubName: Full=Uncharacterized protein {ECO:0000313|EnsemblPlants:PGSC0003DMT400023302};	FOG: Predicted E3 ubiquitin ligase	GO:0005886,plasma membrane; GO:0046872,metal ion binding; GO:0061630,ubiquitin protein ligase activity; GO:0009561,megagametogenesis; GO:0055046,microgametogenesis; GO:0043161,proteasome-mediated ubiquitin-dependent protein catabolic process; GO:0000209,protein polyubiquitination; GO:0042787,NA; GO:0051603,proteolysis involved in cellular protein catabolic process; GO:0051726,regulation of cell c…	Ring finger domain
SMEL_001g137580.1	632.37	663.89	447.21	165.67	186.18	168.57	13283	15498	9207	3246	4097	3274	0.331	-1.593	8.61488e-23	4.55285e-20	down	SMEL3Ch01	30968113	30979252	-	SMEL_001g137580.1.01	--	K13783 MFS transporter, OPA family, solute carrier family 37 (glycerol-3-phosphate transporter), member 1/2 | (RefSeq) putative glycerol-3-phosphate transporter 4 (A)	PREDICTED: uncharacterized protein LOC102586714 isoform X1 [Solanum tuberosum]	RecName: Full=Stem-specific protein TSJT1;	SubName: Full=Uncharacterized protein {ECO:0000313|EnsemblPlants:PGSC0003DMT400023208};	--	--	Aluminium induced protein
SMEL_001g137640.1	2.22	2.3	4.01	4.21	5.38	9.19	52	60	92	92	132	199	2.413	1.271	0.00207556	0.0146907	up	SMEL3Ch01	31237536	31241007	-	SMEL_001g137640.1.01	--	K01381 saccharopepsin [EC:3.4.23.25] | (RefSeq) probable aspartic protease At2g35615 (A)	PREDICTED: basic 7S globulin-like [Solanum tuberosum]	RecName: Full=Basic 7S globulin; AltName: Full=SBg7S; Short=Bg; Contains: RecName: Full=Basic 7S globulin high kDa subunit; Contains: RecName: Full=Basic 7S globulin low kDa subunit; Flags: Precursor;	SubName: Full=Uncharacterized protein {ECO:0000313|EnsemblPlants:PGSC0003DMT400023192};	Aspartyl protease	GO:0004190,aspartic-type endopeptidase activity; GO:0042802,identical protein binding; GO:0045735,nutrient reservoir activity; GO:0030163,protein catabolic process; GO:0006508,proteolysis	Xylanase inhibitor C-terminal
SMEL_001g137770.1	2.1	0.87	4.28	5.71	6.78	6.29	13	6	26	33	44	36	2.817	1.494	0.00940527	0.0465319	up	SMEL3Ch01	31551247	31551627	+	SMEL_001g137770.1.01	--	K16578 CLIP-associating protein 1/2 | (RefSeq) CLIP-associated protein-like (A)	PREDICTED: uncharacterized protein LOC104214731 [Nicotiana sylvestris]	--	SubName: Full=Putative ovule protein {ECO:0000313|EMBL:JAP10496.1}; Flags: Fragment;	FOG: Reverse transcriptase	--	Reverse transcriptase (RNA-dependent DNA polymerase)
SMEL_001g137820.1	71.13	68.17	66.98	36.15	25.2	30.59	1856	1977	1713	880	689	738	0.49	-1.03	3.1177e-10	2.08633e-08	down	SMEL3Ch01	31709079	31715953	+	SMEL_001g137820.1.01	--	K08695 anthocyanidin reductase [EC:1.3.1.77] | (RefSeq) uncharacterized protein LOC8066842 (A)	PREDICTED: cinnamoyl-CoA reductase 1-like isoform X2 [Erythranthe guttata]	RecName: Full=Tetraketide alpha-pyrone reductase 1; EC=1.1.1.-; AltName: Full=Protein DIHYDROFLAVONOL 4-REDUCTASE-LIKE 1;	SubName: Full=Putative alcohol dehydrogenase {ECO:0000313|EMBL:ABR15770.1, ECO:0000313|EnsemblPlants:Solyc01g087640.2.1};	Flavonol reductase/cinnamoyl-CoA reductase	GO:0005783,endoplasmic reticulum; GO:0005634,nucleus; GO:0050662,coenzyme binding; GO:0016491,oxidoreductase activity; GO:0009555,pollen development; GO:0010584,pollen exine formation; GO:0048316,seed development; GO:0080110,sporopollenin biosynthetic process	3-beta hydroxysteroid dehydrogenase/isomerase family
SMEL_001g137870.1	32.94	31.27	38.55	58.52	75.37	88.96	1108	1169	1271	1836	2656	2767	2.388	1.256	4.16513e-08	1.63178e-06	up	SMEL3Ch01	31788959	31795867	-	SMEL_001g137870.1.01	--	K13366 polyamine oxidase [EC:1.5.3.14 1.5.3.16 1.5.3.-] | (RefSeq) polyamine oxidase 1 (A)	PREDICTED: polyamine oxidase 1 [Solanum lycopersicum]	RecName: Full=Polyamine oxidase 1; Short=AtPAO1; EC=1.5.3.16; AltName: Full=N(1)-acetylpolyamine oxidase; AltName: Full=Spermine oxidase;	SubName: Full=Uncharacterized protein {ECO:0000313|EnsemblPlants:Solyc01g087590.2.1};	Amine oxidase	GO:0050660,flavin adenine dinucleotide binding; GO:0052895,N1-acetylspermine:oxygen oxidoreductase (N1-acetylspermidine-forming) activity; GO:0052894,norspermine:oxygen oxidoreductase activity; GO:0046592,polyamine oxidase activity; GO:0052901,spermine:oxygen oxidoreductase (spermidine-forming) activity; GO:0006598,polyamine catabolic process; GO:0046208,spermine catabolic process	Flavin containing amine oxidoreductase
SMEL_001g137880.1	220.27	303.9	279.58	121.78	65.06	102.48	795	1219	989	410	246	342	0.394	-1.343	2.86826e-07	8.74523e-06	down	SMEL3Ch01	31820332	31820553	+	SMEL_001g137880.1.01	--	--	hypothetical protein BC332_02579 [Capsicum chinense]	--	SubName: Full=Uncharacterized protein {ECO:0000313|EMBL:PHU30486.1};	--	--	--
SMEL_001g138020.1	8.32	6.76	4.77	2.72	2.92	2.44	144	130	81	44	53	39	0.452	-1.145	5.66227e-05	0.000817834	down	SMEL3Ch01	31985904	31988861	+	SMEL_001g138020.1.01	--	--	PREDICTED: uncharacterized protein LOC101254731 [Solanum lycopersicum]	--	SubName: Full=Uncharacterized protein {ECO:0000313|EnsemblPlants:Solyc01g087710.2.1};	--	GO:0016021,integral component of membrane	Uncharacterized protein family, UPF0114
SMEL_001g138120.1	19.05	14.84	9.46	5.14	4.68	3.71	723	626	352	182	186	130	0.347	-1.529	3.55026e-09	1.8667e-07	down	SMEL3Ch01	32153538	32155871	+	SMEL_001g138120.1.01	--	K15333 tRNA guanosine-2'-O-methyltransferase [EC:2.1.1.34] | (RefSeq) uncharacterized protein LOC104224633 (A)	hypothetical protein BC332_02391 [Capsicum chinense]	RecName: Full=Subtilisin-like protease SBT1.9 {ECO:0000303|PubMed:16193095}; EC=3.4.21.- {ECO:0000255|PROSITE-ProRule:PRU10082}; AltName: Full=Subtilase subfamily 1 member 9 {ECO:0000303|PubMed:16193095}; Short=AtSBT1.9 {ECO:0000303|PubMed:16193095}; Flags: Precursor;	SubName: Full=Uncharacterized protein {ECO:0000313|EMBL:PHU30298.1};	--	GO:0005576,extracellular region; GO:0004252,serine-type endopeptidase activity; GO:0006508,proteolysis	Subtilase family
SMEL_001g138160.1	14.39	16.32	17.27	49.32	27.85	24.65	606	764	713	1938	1229	960	2.309	1.207	7.21506e-06	0.000145651	up	SMEL3Ch01	32195614	32216078	-	SMEL_001g138160.1.01	--	K00820 glucosamine---fructose-6-phosphate aminotransferase (isomerizing) [EC:2.6.1.16] | (RefSeq) glutamine--fructose-6-phosphate aminotransferase [isomerizing] 2 (A)	PREDICTED: glutamine--fructose-6-phosphate aminotransferase [isomerizing]	RecName: Full=Glutamine--fructose-6-phosphate aminotransferase [isomerizing] {ECO:0000255|HAMAP-Rule:MF_00164}; EC=2.6.1.16 {ECO:0000255|HAMAP-Rule:MF_00164}; AltName: Full=D-fructose-6-phosphate amidotransferase {ECO:0000255|HAMAP-Rule:MF_00164}; AltName: Full=GFAT {ECO:0000255|HAMAP-Rule:MF_00164}; AltName: Full=Glucosamine-6-phosphate synthase {ECO:0000255|HAMAP-Rule:MF_00164}; AltName: Full=H…	SubName: Full=Putative glutamine--fructose-6-phosphate aminotransferase [isomerizing] 2-like {ECO:0000313|EMBL:JAP34129.1};	Glucosamine 6-phosphate synthetases, contain amidotransferase and phosphosugar isomerase domains	GO:0009507,chloroplast; GO:0097367,carbohydrate derivative binding; GO:0004360,glutamine-fructose-6-phosphate transaminase (isomerizing) activity; GO:1901137,carbohydrate derivative biosynthetic process; GO:0006541,glutamine metabolic process	SIS domain
SMEL_001g138360.1	44.14	38.29	57.07	110.05	193.21	127.07	943	909	1195	2193	4324	2510	3.376	1.755	5.0725e-10	3.23682e-08	up	SMEL3Ch01	32609231	32610544	-	SMEL_001g138360.1.01	--	K22683 aspartyl protease family protein [EC:3.4.23.-] | (RefSeq) aspartyl protease family protein 2 (A)	xyloglucan specific endoglucanase inhibitor [Solanum melongena]	RecName: Full=Basic 7S globulin; AltName: Full=SBg7S; Short=Bg; Contains: RecName: Full=Basic 7S globulin high kDa subunit; Contains: RecName: Full=Basic 7S globulin low kDa subunit; Flags: Precursor;	SubName: Full=Xyloglucan specific endoglucanase inhibitor {ECO:0000313|EMBL:ADG23123.1};	Aspartyl protease	GO:0004190,aspartic-type endopeptidase activity; GO:0042802,identical protein binding; GO:0045735,nutrient reservoir activity; GO:0030163,protein catabolic process; GO:0006508,proteolysis	Xylanase inhibitor C-terminal
SMEL_001g138370.1	0.84	1.56	2.07	2.81	3.97	4.12	17	35	41	53	84	77	2.671	1.417	0.000638163	0.00573373	up	SMEL3Ch01	32617611	32618852	-	SMEL_001g138370.1.01	--	K22683 aspartyl protease family protein [EC:3.4.23.-] | (RefSeq) aspartyl protease family protein 2 (A)	PREDICTED: basic 7S globulin-like [Solanum tuberosum]	RecName: Full=Basic 7S globulin; AltName: Full=SBg7S; Short=Bg; Contains: RecName: Full=Basic 7S globulin high kDa subunit; Contains: RecName: Full=Basic 7S globulin low kDa subunit; Flags: Precursor;	SubName: Full=Uncharacterized protein {ECO:0000313|EnsemblPlants:PGSC0003DMT400083215};	Aspartyl protease	GO:0004190,aspartic-type endopeptidase activity; GO:0042802,identical protein binding; GO:0045735,nutrient reservoir activity; GO:0030163,protein catabolic process; GO:0006508,proteolysis	Xylanase inhibitor C-terminal
SMEL_001g138850.1	1.19	1.63	1.39	3.64	4.6	5.45	21	32	24	60	85	89	3.593	1.845	5.20811e-08	1.96601e-06	up	SMEL3Ch01	34264832	34265917	-	SMEL_001g138850.1.01	--	K20893 probable galacturonosyltransferase-like 1 [EC:2.4.1.-] | (RefSeq) probable galacturonosyltransferase-like 1 (A)	PREDICTED: probable galacturonosyltransferase-like 4 [Nicotiana attenuata]	RecName: Full=Probable galacturonosyltransferase-like 4; EC=2.4.1.-; AltName: Full=Galactinol synthase 9; Short=AtGolS9; Short=GolS-9;	RecName: Full=Hexosyltransferase {ECO:0000256|RuleBase:RU362027}; EC=2.4.1.- {ECO:0000256|RuleBase:RU362027};	--	GO:0005794,Golgi apparatus; GO:0000139,Golgi membrane; GO:0016021,integral component of membrane; GO:0090406,pollen tube; GO:0047262,polygalacturonate 4-alpha-galacturonosyltransferase activity; GO:0016757,transferase activity, transferring glycosyl groups; GO:0071555,cell wall organization; GO:0045489,pectin biosynthetic process; GO:0000271,polysaccharide biosynthetic process	Glycosyl transferase family 8
SMEL_001g139340.1	6.8	7.82	9.87	2.78	3.33	3.37	144	184	205	55	74	66	0.425	-1.235	7.95435e-06	0.00015825	down	SMEL3Ch01	36249390	36250995	-	SMEL_001g139340.1.01	--	K10532 heparan-alpha-glucosaminide N-acetyltransferase [EC:2.3.1.78] | (RefSeq) heparan-alpha-glucosaminide N-acetyltransferase-like (A)	PREDICTED: protein FAM179B [Solanum pennellii]	--	SubName: Full=Uncharacterized protein {ECO:0000313|EnsemblPlants:PGSC0003DMT400016102};	Uncharacterized conserved protein	--	CLASP N terminal
SMEL_001g139380.1	8.79	7.99	9.54	3.85	2.16	4.8	93	94	99	38	24	47	0.45	-1.152	0.00108851	0.00881196	down	SMEL3Ch01	36745654	36746640	+	SMEL_001g139380.1.01	--	--	PREDICTED: uncharacterized protein LOC107840218 [Capsicum annuum]	RecName: Full=Basic secretory protease {ECO:0000303|PubMed:22773449}; EC=3.4.24.- {ECO:0000269|PubMed:22773449}; AltName: Full=Boswellia basic secretory protease {ECO:0000303|PubMed:22773449}; Short=BBSP {ECO:0000303|PubMed:22773449}; Flags: Fragments;	SubName: Full=Uncharacterized protein {ECO:0000313|EnsemblPlants:PGSC0003DMT400016056};	--	GO:0046872,metal ion binding; GO:0008237,metallopeptidase activity	Peptidase of plants and bacteria
SMEL_001g139410.1	11.89	7.75	7.03	3.69	3.95	2.98	69	50	40	20	24	16	0.442	-1.178	0.00202582	0.0144129	down	SMEL3Ch01	36823924	36824337	-	SMEL_001g139410.1.01	--	--	hypothetical protein A4A49_54874 [Nicotiana attenuata]	--	SubName: Full=Uncharacterized protein {ECO:0000313|EMBL:OIT07264.1};	--	--	Domain of unknown function (DUF4283)
SMEL_001g139430.1	7.07	8.03	6.5	4.22	2.1	3.13	61	77	55	34	19	25	0.479	-1.061	0.00243599	0.0165269	down	SMEL3Ch01	36825134	36826154	+	SMEL_001g139430.1.01	--	--	PREDICTED: uncharacterized protein LOC107807822 isoform X2 [Nicotiana tabacum]	--	SubName: Full=Putative ovule protein {ECO:0000313|EMBL:JAP37088.1};	--	--	--
SMEL_001g139740.1	63.48	61.1	66.13	119.41	154.24	137.61	1937	2072	1978	3399	4931	3883	2.375	1.248	1.53285e-13	1.9746e-11	up	SMEL3Ch01	37960304	37963498	-	SMEL_001g139740.1.01	--	K01177 beta-amylase [EC:3.2.1.2] | (RefSeq) inactive beta-amylase 9 isoform X1 (A)	PREDICTED: inactive beta-amylase 9 [Solanum tuberosum]	RecName: Full=Inactive beta-amylase 9; AltName: Full=1,4-alpha-D-glucan maltohydrolase; AltName: Full=Inactive beta-amylase 3;	RecName: Full=Beta-amylase {ECO:0000256|RuleBase:RU000509}; EC=3.2.1.2 {ECO:0000256|RuleBase:RU000509};	--	GO:0005737,cytoplasm; GO:0016161,beta-amylase activity; GO:0000272,polysaccharide catabolic process	Glycosyl hydrolase family 14
SMEL_001g139750.1	1.56	1.87	0.26	2.78	7.18	3.37	6	8	1	10	29	12	4.039	2.014	0.00952977	0.0469661	up	SMEL3Ch01	38006058	38006732	-	SMEL_001g139750.1.01	--	--	PREDICTED: uncharacterized protein LOC101265958 [Solanum lycopersicum]	--	SubName: Full=Uncharacterized protein {ECO:0000313|EnsemblPlants:Solyc01g067650.1.1};	--	--	--
SMEL_001g139820.1	35.98	44.8	24.33	16.6	9.19	15.84	86	119	57	37	23	35	0.437	-1.194	0.000889444	0.00745823	down	SMEL3Ch01	38595737	38595883	-	SMEL_001g139820.1.01	--	--	--	--	--	--	--	--
SMEL_001g140050.1	1.66	1.72	1.07	0.53	0.47	0.47	27	31	17	8	8	7	0.364	-1.457	0.00537091	0.0306563	down	SMEL3Ch01	39972078	39973076	+	SMEL_001g140050.1.01	--	K09286 EREBP-like factor | (RefSeq) ethylene-responsive transcription factor LEP (A)	PREDICTED: ethylene-responsive transcription factor ERF086 [Solanum tuberosum]	RecName: Full=Ethylene-responsive transcription factor ERF086;	SubName: Full=Uncharacterized protein {ECO:0000313|EnsemblPlants:PGSC0003DMT400058356};	--	GO:0005634,nucleus; GO:0003700,DNA-binding transcription factor activity; GO:0043565,sequence-specific DNA binding; GO:0044212,transcription regulatory region DNA binding; GO:0010432,bract development; GO:0009873,ethylene-activated signaling pathway; GO:0010582,floral meristem determinacy; GO:0010451,floral meristem growth; GO:0009908,flower development; GO:0010102,lateral root morphogenesis; GO:…	AP2 domain
SMEL_001g140310.1	1.06	0.95	0.58	0.15	0	0.08	15	15	8	2	0	1	0.094	-3.404	0.00187254	0.0135431	down	SMEL3Ch01	41583002	41583952	-	SMEL_001g140310.1.01	--	--	PREDICTED: uncharacterized protein LOC104647475 [Solanum lycopersicum]	--	SubName: Full=Uncharacterized protein {ECO:0000313|EnsemblPlants:Solyc01g067340.1.1};	--	GO:0046983,protein dimerization activity	Helix-loop-helix DNA-binding domain
SMEL_001g140340.1	2.36	3.63	2.16	1.27	0.7	0.85	48	82	43	24	15	16	0.38	-1.396	0.000525655	0.00491694	down	SMEL3Ch01	41691856	41693106	-	SMEL_001g140340.1.01	--	K19073 divinyl chlorophyllide a 8-vinyl-reductase [EC:1.3.1.75] | (RefSeq) divinyl chlorophyllide a 8-vinyl-reductase, chloroplastic (A)	PREDICTED: divinyl chlorophyllide a 8-vinyl-reductase, chloroplastic [Solanum pennellii]	RecName: Full=Divinyl chlorophyllide a 8-vinyl-reductase, chloroplastic; EC=1.3.1.75 {ECO:0000269|PubMed:23154534}; Flags: Precursor;	SubName: Full=Uncharacterized protein {ECO:0000313|EnsemblPlants:Solyc01g067290.2.1};	Predicted dehydrogenase	GO:0009507,chloroplast; GO:0033728,divinyl chlorophyllide a 8-vinyl-reductase activity; GO:0015995,chlorophyll biosynthetic process	NAD(P)H-binding
SMEL_001g140680.1	10.95	13.59	7.27	3.61	4.7	2.66	169	233	110	52	76	38	0.384	-1.381	1.09192e-05	0.000209355	down	SMEL3Ch01	44216721	44217947	-	SMEL_001g140680.1.01	--	K04733 interleukin-1 receptor-associated kinase 4 [EC:2.7.11.1] | (RefSeq) receptor-like protein kinase ANXUR1 isoform X1 (A)	PREDICTED: uncharacterized protein LOC102580148 [Solanum tuberosum]	RecName: Full=Heavy metal-associated isoprenylated plant protein 36 {ECO:0000303|PubMed:21072340, ECO:0000303|PubMed:23368984}; Short=AtHIP36 {ECO:0000303|PubMed:21072340, ECO:0000303|PubMed:23368984}; Flags: Precursor;	SubName: Full=Uncharacterized protein {ECO:0000313|EnsemblPlants:PGSC0003DMT400029504};	Copper chaperone	GO:0005737,cytoplasm; GO:0046914,transition metal ion binding; GO:0046916,cellular transition metal ion homeostasis; GO:0030001,metal ion transport	Heavy-metal-associated domain
SMEL_001g140970.1	331.53	419.87	264.72	86.55	120.2	137	5708	8034	4467	1390	2168	2181	0.377	-1.406	3.77842e-09	1.9816e-07	down	SMEL3Ch01	45285686	45288381	+	SMEL_001g140970.1.01	--	K09286 EREBP-like factor | (RefSeq) cip353; ethylene-responsive transcription factor RAP2-3 (A)	ethylene-responsive transcription factor RAP2-3 [Solanum tuberosum]	RecName: Full=Ethylene-responsive transcription factor RAP2-3; AltName: Full=Cadmium-induced protein AS30; AltName: Full=Ethylene response factor 72; Short=ERF72; AltName: Full=Ethylene-responsive element binding protein; Short=AtEBP; AltName: Full=Protein RELATED TO APETALA2 3; Short=Related to AP2 3;	SubName: Full=Uncharacterized protein {ECO:0000313|EnsemblPlants:PGSC0003DMT400043311};	--	GO:0005737,cytoplasm; GO:0005634,nucleus; GO:0005886,plasma membrane; GO:0003677,DNA binding; GO:0003700,DNA-binding transcription factor activity; GO:0043565,sequence-specific DNA binding; GO:0008219,cell death; GO:0009873,ethylene-activated signaling pathway; GO:0010286,heat acclimation; GO:0045893,positive regulation of transcription, DNA-templated; GO:0009735,response to cytokinin; GO:0009723…	AP2 domain
SMEL_001g141270.1	0.17	0.16	0.35	1.68	5.47	5.26	1	1	2	9	33	28	20.343	4.346	7.10985e-06	0.000144233	up	SMEL3Ch01	47728525	47728889	-	SMEL_001g141270.1.01	--	--	PREDICTED: uncharacterized protein LOC107775411 [Nicotiana tabacum]	--	SubName: Full=uncharacterized protein LOC107775411 {ECO:0000313|RefSeq:XP_016450623.1};	--	--	--
SMEL_001g141470.1	30.36	25.86	15.6	7.93	3.1	4.06	542	513	273	132	58	67	0.232	-2.11	4.36764e-09	2.25002e-07	down	SMEL3Ch01	49050703	49052453	+	SMEL_001g141470.1.01	--	K17506 protein phosphatase 1L [EC:3.1.3.16] | (RefSeq) probable protein phosphatase 2C 74 (A)	PREDICTED: probable protein phosphatase 2C 34 [Solanum pennellii]	RecName: Full=Probable protein phosphatase 2C 73; Short=AtPP2C73; EC=3.1.3.16; AltName: Full=AtPPC6;7;	SubName: Full=Uncharacterized protein {ECO:0000313|EnsemblPlants:Solyc01g065700.2.1};	Serine/threonine protein phosphatase	GO:0005886,plasma membrane; GO:0046872,metal ion binding; GO:0004722,protein serine/threonine phosphatase activity; GO:0009819,drought recovery; GO:0000226,microtubule cytoskeleton organization; GO:0045926,negative regulation of growth; GO:0006470,protein dephosphorylation	Protein phosphatase 2C
SMEL_001g141520.1	6.07	6.27	4.89	10.12	11.3	13.13	81	93	64	126	158	162	2.22	1.15	7.90324e-07	2.14334e-05	up	SMEL3Ch01	49318087	49319386	+	SMEL_001g141520.1.01	--	--	PREDICTED: uncharacterized protein LOC101258403 isoform X2 [Solanum lycopersicum]	--	SubName: Full=Uncharacterized protein {ECO:0000313|EnsemblPlants:Solyc01g060260.2.1};	--	--	--
SMEL_001g141540.1	2.05	2.18	2.61	1.05	0.66	0.72	107	127	134	51	36	35	0.386	-1.372	4.07384e-06	8.98031e-05	down	SMEL3Ch01	49448854	49454832	+	SMEL_001g141540.1.01	--	--	PREDICTED: uncharacterized protein LOC102606116 [Solanum tuberosum]	--	SubName: Full=Uncharacterized protein {ECO:0000313|EnsemblPlants:PGSC0003DMT400038779};	--	--	Domain of unknown function (DUF4378)
SMEL_001g141890.1	84.49	106.93	165.22	182.7	271.62	261.57	647	910	1240	1305	2179	1852	2.188	1.13	0.000320558	0.00331346	up	SMEL3Ch01	53740003	53740473	-	SMEL_001g141890.1.01	--	K02183 calmodulin | (RefSeq) calmodulin (A)	PREDICTED: calmodulin [Solanum tuberosum]	RecName: Full=Putative calmodulin-like protein 6;	SubName: Full=Uncharacterized protein {ECO:0000313|EnsemblPlants:PGSC0003DMT400003037};	Calmodulin and related proteins (EF-Hand superfamily)	GO:0005509,calcium ion binding	EF-hand domain
SMEL_001g142120.1	122.84	166.36	290.39	52.27	43.98	58.32	2754	4145	6381	1093	1033	1209	0.288	-1.793	1.13707e-07	3.90854e-06	down	SMEL3Ch01	54611822	54613552	-	SMEL_001g142120.1.01	--	K19892 glucan endo-1,3-beta-glucosidase 4 [EC:3.2.1.39] | (RefSeq) glucan endo-1,3-beta-glucosidase 4-like (A)	Glucan endo-1,3-beta-glucosidase, basic isoform 2 [Capsicum baccatum]	RecName: Full=Glucan endo-1,3-beta-glucosidase, basic isoform 2; EC=3.2.1.39; AltName: Full=(1->3)-beta-glucan endohydrolase; Short=(1->3)-beta-glucanase; AltName: Full=Beta-1,3-endoglucanase; Flags: Precursor;	SubName: Full=Glucan endo-1,3-beta-glucosidase, basic isoform 2 {ECO:0000313|EMBL:PHT59402.1};	--	GO:0005773,vacuole; GO:0042973,glucan endo-1,3-beta-D-glucosidase activity; GO:0005975,carbohydrate metabolic process; GO:0006952,defense response	Glycosyl hydrolases family 17
SMEL_001g142370.1	0.89	1.25	1.87	3.66	5.25	4.24	14	22	29	54	87	62	3.601	1.848	3.59572e-06	8.07314e-05	up	SMEL3Ch01	56917269	56923389	-	SMEL_001g142370.1.01	--	K15255 ATP-dependent DNA helicase PIF1 [EC:3.6.4.12] | (RefSeq) uncharacterized protein LOC104241324 (A)	PREDICTED: uncharacterized protein LOC104241324 [Nicotiana sylvestris]	--	RecName: Full=ATP-dependent DNA helicase {ECO:0000256|RuleBase:RU363044}; EC=3.6.4.12 {ECO:0000256|RuleBase:RU363044};	DNA helicase PIF1/RRM3	GO:0005524,ATP binding; GO:0003678,DNA helicase activity; GO:0006310,DNA recombination; GO:0006281,DNA repair; GO:0000723,telomere maintenance	PIF1-like helicase
SMEL_001g142380.1	3.31	3.96	2.08	1.47	0.81	0.53	94	125	58	39	24	14	0.331	-1.595	0.000120587	0.00151643	down	SMEL3Ch01	56968133	56970911	+	SMEL_001g142380.1.01	--	K06636 structural maintenance of chromosome 1 | (RefSeq) uncharacterized protein LOC112290944 isoform X1 (A)	PREDICTED: IRK-interacting protein-like [Solanum tuberosum]	RecName: Full=IRK-interacting protein {ECO:0000303|PubMed:15618632};	SubName: Full=Uncharacterized protein {ECO:0000313|EnsemblPlants:PGSC0003DMT400081474};	--	--	GrpE
SMEL_001g142760.1	95.58	109.86	73.48	31.82	9.25	35.63	937	1197	706	291	95	323	0.305	-1.714	4.16894e-05	0.000633673	down	SMEL3Ch01	64545983	64547549	+	SMEL_001g142760.1.01	--	K00430 peroxidase [EC:1.11.1.7] | (RefSeq) peroxidase N-like (A)	PREDICTED: peroxidase N-like [Solanum pennellii]	RecName: Full=Peroxidase N; EC=1.11.1.7; AltName: Full=Neutral peroxidase; Flags: Precursor;	RecName: Full=Peroxidase {ECO:0000256|RuleBase:RU362060, ECO:0000256|SAAS:SAAS00709852}; EC=1.11.1.7 {ECO:0000256|RuleBase:RU362060, ECO:0000256|SAAS:SAAS00709852};	--	GO:0005576,extracellular region; GO:0020037,heme binding; GO:0046872,metal ion binding; GO:0004601,peroxidase activity; GO:0042744,hydrogen peroxide catabolic process; GO:0006979,response to oxidative stress	Peroxidase
SMEL_001g142940.1	3.39	4.32	1.68	0.76	0.4	0.51	72	102	35	15	9	10	0.197	-2.345	1.05278e-06	2.75016e-05	down	SMEL3Ch01	65696637	65697944	+	SMEL_001g142940.1.01	--	K04733 interleukin-1 receptor-associated kinase 4 [EC:2.7.11.1] | (RefSeq) G-type lectin S-receptor-like serine/threonine-protein kinase LECRK4 (A)	PREDICTED: G-type lectin S-receptor-like serine/threonine-protein kinase RLK1 [Solanum tuberosum]	RecName: Full=G-type lectin S-receptor-like serine/threonine-protein kinase LECRK3 {ECO:0000305}; Short=OsLecRK3 {ECO:0000303|PubMed:25485617}; EC=2.7.11.1 {ECO:0000305}; AltName: Full=OsRLCK135 {ECO:0000305}; Flags: Precursor;	SubName: Full=Uncharacterized protein {ECO:0000313|EnsemblPlants:PGSC0003DMT400076879};	--	GO:0016021,integral component of membrane; GO:0005524,ATP binding; GO:0030246,carbohydrate binding; GO:0004674,protein serine/threonine kinase activity; GO:0006952,defense response	D-mannose binding lectin
SMEL_001g143490.1	39.18	32.69	78.81	71.86	135.35	104.58	1170	1085	2307	2002	4235	2888	2.242	1.164	0.00270051	0.0179318	up	SMEL3Ch01	71081727	71086704	-	SMEL_001g143490.1.01	--	K14376 poly(A) polymerase [EC:2.7.7.19] | (RefSeq) nuclear poly(A) polymerase 3-like (A)	PREDICTED: nuclear poly(A) polymerase 3-like [Solanum tuberosum]	RecName: Full=Nuclear poly(A) polymerase 3 {ECO:0000303|PubMed:18479511}; Short=PAP(III) {ECO:0000305}; Short=Poly(A) polymerase III {ECO:0000305}; EC=2.7.7.19 {ECO:0000269|PubMed:15297145}; AltName: Full=Polynucleotide adenylyltransferase 3 {ECO:0000305};	SubName: Full=Uncharacterized protein {ECO:0000313|EnsemblPlants:PGSC0003DMT400074732};	Poly(A) polymerase and related nucleotidyltransferases	GO:0005737,cytoplasm; GO:0005634,nucleus; GO:0005524,ATP binding; GO:0046872,metal ion binding; GO:0004652,polynucleotide adenylyltransferase activity; GO:0003723,RNA binding; GO:0006378,mRNA polyadenylation	Poly(A) polymerase central domain
SMEL_001g143710.1	0.7	0.57	0.65	1.3	1.22	2.07	11	10	10	19	20	30	2.633	1.396	0.00669247	0.0362519	up	SMEL3Ch01	75088813	75090891	+	SMEL_001g143710.1.01	--	K19613 leucine-rich repeat protein SHOC2 | (RefSeq) receptor-like protein 12 (A)	Hcr9-OR2A [Solanum pimpinellifolium]	RecName: Full=Receptor-like protein Cf-9 homolog {ECO:0000305}; Flags: Precursor;	SubName: Full=Uncharacterized protein {ECO:0000313|EnsemblPlants:PGSC0003DMT400027792};	FOG: Leucine rich repeat	GO:0016021,integral component of membrane; GO:0005886,plasma membrane	Leucine rich repeat
SMEL_001g144130.1	1.07	0.59	2.1	4.15	5.74	6.77	13	8	25	47	73	76	4.853	2.279	6.85868e-06	0.000139826	up	SMEL3Ch01	79354566	79355312	+	SMEL_001g144130.1.01	--	K13459 disease resistance protein RPS2 | (RefSeq) probable disease resistance protein At1g61300 (A)	PREDICTED: LOW QUALITY PROTEIN: probable disease resistance protein At4g27220 [Solanum lycopersicum]	RecName: Full=Probable disease resistance protein At1g61190;	SubName: Full=Uncharacterized protein {ECO:0000313|EnsemblPlants:Solyc12g016220.1.1};	Apoptotic ATPase	GO:0005886,plasma membrane; GO:0043531,ADP binding; GO:0005524,ATP binding; GO:0006952,defense response; GO:0007165,signal transduction	NB-ARC domain
SMEL_001g145760.1	56.59	43.45	56.48	25.72	19.08	18.29	184	157	180	78	65	55	0.441	-1.18	4.34297e-06	9.47227e-05	down	SMEL3Ch01	104346969	104347342	+	SMEL_001g145760.1.01	--	--	--	--	SubName: Full=Uncharacterized protein {ECO:0000313|EnsemblPlants:PGSC0003DMT400034044};	--	--	--
SMEL_001g145890.1	10.02	13.23	16.29	18.37	30.38	41.77	214	314	341	366	680	825	2.522	1.335	0.00012992	0.00161409	up	SMEL3Ch01	105495916	105497656	-	SMEL_001g145890.1.01	--	K09422 transcription factor MYB, plant | (RefSeq) transcription factor MYB108-like (A)	PREDICTED: transcription factor MYB108-like [Solanum pennellii]	RecName: Full=Transcription factor MYB78 {ECO:0000303|PubMed:9839469}; AltName: Full=Myb-related protein 78 {ECO:0000303|PubMed:9839469}; Short=AtMYB78 {ECO:0000303|PubMed:9839469};	SubName: Full=Uncharacterized protein {ECO:0000313|EnsemblPlants:Solyc01g057910.2.1};	Transcription factor, Myb superfamily	GO:0005634,nucleus; GO:0003700,DNA-binding transcription factor activity; GO:0043565,sequence-specific DNA binding; GO:0009737,response to abscisic acid; GO:1902074,response to salt; GO:0009651,response to salt stress; GO:0006351,transcription, DNA-templated	Myb-like DNA-binding domain
SMEL_001g146980.1	0.13	0	0	0.99	1.26	0.57	1	0	0	7	10	4	22.543	4.495	0.00273711	0.0181281	up	SMEL3Ch01	118329536	118330000	+	SMEL_001g146980.1.01	--	K10863 aprataxin [EC:3.1.11.7 3.1.11.8 3.1.12.2] | (RefSeq) basic helix-loop-helix family protein (A)	PREDICTED: transcription factor bHLH140-like [Nicotiana tomentosiformis]	RecName: Full=Transcription factor bHLH140; AltName: Full=Basic helix-loop-helix protein 140; Short=AtbHLH140; Short=bHLH 140; AltName: Full=Transcription factor EN 122; AltName: Full=bHLH transcription factor bHLH140;	SubName: Full=Uncharacterized protein {ECO:0000313|EnsemblPlants:Solyc09g005070.1.1};	--	GO:0005634,nucleus; GO:0047627,adenylylsulfatase activity; GO:0005524,ATP binding; GO:0003677,DNA binding; GO:0046872,metal ion binding; GO:0046983,protein dimerization activity; GO:0006260,DNA replication; GO:0009150,purine ribonucleotide metabolic process; GO:0006355,regulation of transcription, DNA-templated; GO:0006790,sulfur compound metabolic process; GO:0006351,transcription, DNA-templated	Helix-loop-helix DNA-binding domain
SMEL_001g147350.1	30.47	28.27	39.74	68.53	81.02	60.8	708	730	905	1485	1972	1306	2.332	1.222	3.62895e-08	1.45802e-06	up	SMEL3Ch01	121830481	121836257	+	SMEL_001g147350.1.01	--	K10661 E3 ubiquitin-protein ligase MARCH6 [EC:2.3.2.27] | (RefSeq) probable E3 ubiquitin ligase SUD1 (A)	PREDICTED: uncharacterized protein LOC102579093 [Solanum tuberosum]	RecName: Full=Probable E3 ubiquitin ligase SUD1; EC=2.3.2.27; AltName: Full=Protein ECERIFERUM 9; AltName: Full=Protein SUPPRESSOR OF DRY2 DEFFECTS 1; Short=AtSUD1; AltName: Full=RING-type E3 ubiquitin transferase SUD1 {ECO:0000305}; AltName: Full=RING/U-box domain-containing protein;	SubName: Full=Uncharacterized protein {ECO:0000313|EnsemblPlants:PGSC0003DMT400016778};	Protein involved in mRNA turnover and stability	GO:0030176,integral component of endoplasmic reticulum membrane; GO:1904264,NA; GO:0004842,ubiquitin-protein transferase activity; GO:0008270,zinc ion binding; GO:0042335,cuticle development; GO:0010143,cutin biosynthetic process; GO:0008299,isoprenoid biosynthetic process; GO:1900490,positive regulation of hydroxymethylglutaryl-CoA reductase (NADPH) activity; GO:0009414,response to water depriva…	Protein of unknown function (DUF3675)
SMEL_001g148030.1	7.67	6.9	6.58	5.11	1.47	2.6	214	214	180	133	43	67	0.473	-1.08	0.00619239	0.0341534	down	SMEL3Ch01	125016795	125018607	+	SMEL_001g148030.1.01	--	K20617 cytochrome P450 family 71 subfamily A | (RefSeq) cytochrome P450 71A1-like (A)	PREDICTED: cytochrome P450 83B1-like [Solanum tuberosum]	RecName: Full=Cytochrome P450 71A1; EC=1.14.-.-; AltName: Full=ARP-2; AltName: Full=CYPLXXIA1;	SubName: Full=Uncharacterized protein {ECO:0000313|EnsemblPlants:PGSC0003DMT400068847};	Cytochrome P450 CYP2 subfamily	GO:0005789,endoplasmic reticulum membrane; GO:0016021,integral component of membrane; GO:0031090,organelle membrane; GO:0020037,heme binding; GO:0005506,iron ion binding; GO:0004497,monooxygenase activity; GO:0016705,oxidoreductase activity, acting on paired donors, with incorporation or reduction of molecular oxygen; GO:0009835,fruit ripening	Cytochrome P450
SMEL_001g148220.1	11.61	13.42	9.77	4.37	3.35	5.07	228	293	188	80	69	92	0.406	-1.302	4.10324e-08	1.61089e-06	down	SMEL3Ch01	126030298	126033884	+	SMEL_001g148220.1.01	--	K22832 1,3-beta-glucanosyltransferase GAS1 [EC:2.4.1.-] | (RefSeq) glucan endo-1,3-beta-glucosidase-like protein 3-like (A)	plasmodesmata callose-binding protein 4 [Capsicum chinense]	RecName: Full=PLASMODESMATA CALLOSE-BINDING PROTEIN 3; Short=AtPDCB3; Flags: Precursor;	SubName: Full=Plasmodesmata callose-binding protein 4 {ECO:0000313|EMBL:PHU29791.1};	--	GO:0031225,anchored component of membrane; GO:0046658,anchored component of plasma membrane; GO:0009506,plasmodesma; GO:0001872,(1->3)-beta-D-glucan binding; GO:0004553,hydrolase activity, hydrolyzing O-glycosyl compounds; GO:0030247,polysaccharide binding	X8 domain
SMEL_001g148280.1	7.43	8.08	2.25	0.98	0.6	0.14	236	285	70	29	20	4	0.107	-3.219	6.99752e-08	2.54816e-06	down	SMEL3Ch01	126129639	126132284	-	SMEL_001g148280.1.01	--	K07408 cytochrome P450 family 1 subfamily A polypeptide 1 [EC:1.14.14.1] | (RefSeq) cytochrome P450 93A2-like (A)	PREDICTED: cytochrome P450 93A2-like [Solanum tuberosum]	RecName: Full=3,9-dihydroxypterocarpan 6A-monooxygenase; EC=1.14.13.28; AltName: Full=Cytochrome P450 93A1; AltName: Full=Dihydroxypterocarpan 6a-hydroxylase; Short=D6aH;	SubName: Full=Uncharacterized protein {ECO:0000313|EnsemblPlants:PGSC0003DMT400091529};	Cytochrome P450 CYP2 subfamily	GO:0016020,membrane; GO:0047082,3,9-dihydroxypterocarpan 6a-monooxygenase activity; GO:0020037,heme binding; GO:0005506,iron ion binding; GO:0016709,oxidoreductase activity, acting on paired donors, with incorporation or reduction of molecular oxygen, NAD(P)H as one donor, and incorporation of one atom of oxygen; GO:0006952,defense response; GO:0044550,secondary metabolite biosynthetic process	Cytochrome P450
SMEL_001g148690.1	1.53	1.26	0.89	0.35	0.36	0.27	37	34	21	8	9	6	0.295	-1.761	0.000548587	0.00508405	down	SMEL3Ch01	127686515	127688002	-	SMEL_001g148690.1.01	--	K09528 DnaJ homolog subfamily C member 8 | (RefSeq) AT-rich interactive domain-containing protein 4B-like (A)	PREDICTED: protein FAF-like, chloroplastic isoform X1 [Capsicum annuum]	RecName: Full=Protein FAF-like, chloroplastic; Flags: Precursor;	SubName: Full=protein FAF-like, chloroplastic isoform X1 {ECO:0000313|RefSeq:XP_016578362.1}; SubName: Full=protein FAF-like, chloroplastic isoform X2 {ECO:0000313|RefSeq:XP_016578367.1};	--	GO:0009507,chloroplast	Fantastic Four meristem regulator
SMEL_001g148720.1	54.88	45.51	41.74	21.2	18.28	17.16	3327	3066	2480	1199	1161	962	0.44	-1.186	1.12362e-16	2.46371e-14	down	SMEL3Ch01	127763159	127772514	-	SMEL_001g148720.1.01	--	K08857 NIMA (never in mitosis gene a)-related kinase 1/4/5 [EC:2.7.11.1] | (RefSeq) serine/threonine-protein kinase Nek5-like (A)	PREDICTED: serine/threonine-protein kinase Nek5-like [Solanum tuberosum]	RecName: Full=Serine/threonine-protein kinase Nek5; EC=2.7.11.1; AltName: Full=NimA-related protein kinase 5; Short=AtNEK6; Short=AtNek5;	SubName: Full=Uncharacterized protein {ECO:0000313|EnsemblPlants:PGSC0003DMT400038193};	Serine/threonine protein kinase	GO:0055028,cortical microtubule; GO:0005524,ATP binding; GO:0004672,protein kinase activity; GO:0004674,protein serine/threonine kinase activity; GO:0043622,cortical microtubule organization; GO:0009913,epidermal cell differentiation; GO:0007017,microtubule-based process	Protein kinase domain
SMEL_001g148880.1	0	0.17	0.29	0.91	1.62	1.23	0	2	3	9	18	12	9.005	3.171	0.000824816	0.0069845	up	SMEL3Ch01	128070490	128071140	-	SMEL_001g148880.1.01	--	K09286 EREBP-like factor | (RefSeq) hypothetical protein (A)	Dehydration-responsive element-binding protein 1B [Capsicum baccatum]	RecName: Full=Dehydration-responsive element-binding protein 1D; Short=Protein DREB1D; AltName: Full=C-repeat/dehydration-responsive element-binding factor 4; Short=C-repeat-binding factor 4; Short=CRT/DRE-binding factor 4;	SubName: Full=Uncharacterized protein {ECO:0000313|EnsemblPlants:PGSC0003DMT400088795};	--	GO:0005634,nucleus; GO:0003700,DNA-binding transcription factor activity; GO:0043565,sequence-specific DNA binding; GO:0009738,abscisic acid-activated signaling pathway; GO:0019760,glucosinolate metabolic process; GO:0006351,transcription, DNA-templated	AP2 domain
SMEL_001g148980.1	82.36	198.56	65.24	32.04	37.15	31.19	237	635	184	86	112	83	0.324	-1.626	3.46212e-05	0.000545132	down	SMEL3Ch01	128245904	128246080	-	SMEL_001g148980.1.01	--	--	PREDICTED: uncharacterized protein LOC104101655 [Nicotiana tomentosiformis]	--	SubName: Full=Uncharacterized protein {ECO:0000313|EnsemblPlants:PGSC0003DMT400020823};	--	--	--
SMEL_001g149010.1	2.13	2.37	1.66	0.72	1.08	0.63	51	63	39	16	27	14	0.438	-1.191	0.00184383	0.0133908	down	SMEL3Ch01	128285806	128290464	+	SMEL_001g149010.1.01	--	K20363 protein transport protein YIP1 | (RefSeq) uncharacterized protein LOC111296848 isoform X1 (A)	PREDICTED: uncharacterized protein LOC102587476 [Solanum tuberosum]	--	SubName: Full=Uncharacterized protein {ECO:0000313|EnsemblPlants:PGSC0003DMT400030589};	--	--	Serine aminopeptidase, S33
SMEL_001g149020.1	19.19	31.1	27.94	10.36	13.28	7.6	131	236	187	66	95	48	0.439	-1.189	0.000124673	0.00156209	down	SMEL3Ch01	128296350	128297627	+	SMEL_001g149020.1.01	--	--	hypothetical protein A4A49_41195 [Nicotiana attenuata]	--	SubName: Full=Uncharacterized protein {ECO:0000313|EMBL:OIT28343.1};	--	--	--
SMEL_001g149130.1	1.57	1.41	1.24	7.11	4.62	6.33	71	71	55	300	219	265	4.715	2.237	2.25935e-20	8.6236e-18	up	SMEL3Ch01	128412190	128414973	+	SMEL_001g149130.1.01	--	K13466 EIX receptor 1/2 | (RefSeq) Eix2; EIX receptor 2 (A)	PREDICTED: probable leucine-rich repeat receptor-like protein kinase At2g33170 [Solanum tuberosum]	RecName: Full=Receptor-like protein EIX2 {ECO:0000305}; AltName: Full=EIX receptor 2 {ECO:0000312|EMBL:AAR28378.1}; Flags: Precursor;	SubName: Full=Uncharacterized protein {ECO:0000313|EnsemblPlants:PGSC0003DMT400049067};	FOG: Leucine rich repeat	GO:0016021,integral component of membrane; GO:0005886,plasma membrane; GO:0050832,defense response to fungus	Leucine rich repeat
SMEL_001g149270.1	41.53	44.07	46.75	77.32	87.85	78	630	743	695	1094	1396	1094	2.02	1.014	8.29003e-11	6.05907e-09	up	SMEL3Ch01	128848706	128851266	+	SMEL_001g149270.1.01	--	K03868 RING-box protein 1 [EC:2.3.2.32] | (RefSeq) uncharacterized LOC100792815 (A)	PREDICTED: GEM-like protein 5 [Solanum tuberosum]	RecName: Full=GEM-like protein 5;	SubName: Full=Uncharacterized protein {ECO:0000313|EnsemblPlants:PGSC0003DMT400077173};	--	GO:0009793,embryo development ending in seed dormancy; GO:0098755,maintenance of seed dormancy by absisic acid; GO:0010029,regulation of seed germination; GO:0009845,seed germination	GRAM domain
SMEL_001g149610.1	0.89	1.22	7.34	0.75	0.37	0.63	23	35	185	18	10	15	0.194	-2.367	0.00256867	0.0172396	down	SMEL3Ch01	130171676	130174072	+	SMEL_001g149610.1.01	--	K15472 premnaspirodiene oxygenase [EC:1.14.13.121] | (RefSeq) CYP71D4; premnaspirodiene oxygenase (A)	PREDICTED: premnaspirodiene oxygenase-like [Solanum lycopersicum]	RecName: Full=Premnaspirodiene oxygenase; Short=HPO; EC=1.14.13.121; AltName: Full=Cytochrome P450 71D55;	SubName: Full=Uncharacterized protein {ECO:0000313|EnsemblPlants:Solyc01g008670.2.1};	Cytochrome P450 CYP2 subfamily	GO:0016021,integral component of membrane; GO:0020037,heme binding; GO:0005506,iron ion binding; GO:0004497,monooxygenase activity; GO:0016705,oxidoreductase activity, acting on paired donors, with incorporation or reduction of molecular oxygen	Cytochrome P450
SMEL_001g149620.1	6.88	8.31	14.04	2.87	2.78	3.66	175	235	350	68	74	86	0.346	-1.533	1.34107e-05	0.000250142	down	SMEL3Ch01	130197002	130199788	-	SMEL_001g149620.1.01	--	K21777 G2/mitotic-specific cyclin-B, other | (RefSeq) G2/mitotic-specific cyclin S13-7-like (A)	PREDICTED: G2/mitotic-specific cyclin S13-7-like [Solanum tuberosum]	RecName: Full=G2/mitotic-specific cyclin-1;	SubName: Full=Uncharacterized protein {ECO:0000313|EnsemblPlants:Solyc01g009040.2.1};	Cyclin B and related kinase-activating proteins	GO:0005634,nucleus; GO:0007049,cell cycle; GO:0051301,cell division	Cyclin, N-terminal domain
SMEL_001g150130.1	27.07	22.05	14.86	7.67	7.55	7.39	749	678	403	198	219	189	0.393	-1.347	1.06781e-09	6.43528e-08	down	SMEL3Ch01	131171710	131175406	+	SMEL_001g150130.1.01	--	K00512 steroid 17alpha-monooxygenase / 17alpha-hydroxyprogesterone deacetylase [EC:1.14.14.19 1.14.14.32] | (RefSeq) premnaspirodiene oxygenase-like isoform X1 (A)	PREDICTED: premnaspirodiene oxygenase-like [Solanum pennellii]	RecName: Full=Premnaspirodiene oxygenase; Short=HPO; EC=1.14.13.121; AltName: Full=Cytochrome P450 71D55;	SubName: Full=Uncharacterized protein {ECO:0000313|EnsemblPlants:Solyc01g008650.2.1};	Cytochrome P450 CYP2 subfamily	GO:0016021,integral component of membrane; GO:0020037,heme binding; GO:0005506,iron ion binding; GO:0004497,monooxygenase activity; GO:0016705,oxidoreductase activity, acting on paired donors, with incorporation or reduction of molecular oxygen	Cytochrome P450
SMEL_001g150690.1	8.98	8.88	4.37	1.39	2.92	3.38	132	145	63	19	45	46	0.389	-1.361	0.00116725	0.00931403	down	SMEL3Ch01	132742201	132745282	+	SMEL_001g150690.1.01	--	--	PREDICTED: uncharacterized protein At4g14100-like [Solanum tuberosum]	RecName: Full=Uncharacterized protein At4g14100; Flags: Precursor;	SubName: Full=Uncharacterized protein {ECO:0000313|EnsemblPlants:PGSC0003DMT400042258};	--	GO:0005773,vacuole	--
SMEL_001g150790.1	25.53	31.19	16.54	12.93	8.9	9.87	523	710	332	247	191	187	0.48	-1.06	2.33946e-05	0.000393049	down	SMEL3Ch01	132855504	132863073	+	SMEL_001g150790.1.01	--	K05765 cofilin | (RefSeq) uncharacterized LOC101301142 (A)	PREDICTED: transcription factor bHLH111 [Solanum tuberosum]	RecName: Full=Transcription factor bHLH111; AltName: Full=Basic helix-loop-helix protein 111; Short=AtbHLH111; Short=bHLH 111; AltName: Full=Transcription factor EN 66; AltName: Full=bHLH transcription factor bHLH111;	SubName: Full=transcription factor bHLH111 {ECO:0000313|RefSeq:XP_016537422.1};	--	GO:0005634,nucleus; GO:0001046,core promoter sequence-specific DNA binding; GO:0046983,protein dimerization activity; GO:0001228,DNA-binding transcription activator activity, RNA polymerase II-specific; GO:0006366,transcription by RNA polymerase II	--
SMEL_001g150880.1	6.14	8.32	14.87	20.83	29.08	38.29	205	309	487	649	1018	1183	3.273	1.71	8.43371e-06	0.000166821	up	SMEL3Ch01	133183459	133189323	+	SMEL_001g150880.1.01	--	K01580 glutamate decarboxylase [EC:4.1.1.15] | (RefSeq) glutamate decarboxylase 4 (A)	Glutamate decarboxylase 1 [Capsicum annuum]	RecName: Full=Glutamate decarboxylase 1; Short=GAD 1; EC=4.1.1.15;	RecName: Full=Glutamate decarboxylase {ECO:0000256|RuleBase:RU361171}; EC=4.1.1.15 {ECO:0000256|RuleBase:RU361171};	Glutamate decarboxylase/sphingosine phosphate lyase	GO:0005829,cytosol; GO:0005516,calmodulin binding; GO:0004351,glutamate decarboxylase activity; GO:0030170,pyridoxal phosphate binding; GO:0006536,glutamate metabolic process; GO:0046686,response to cadmium ion	Pyridoxal-dependent decarboxylase conserved domain
SMEL_001g150900.1	29.04	30.23	9.7	13.45	9.94	5.6	516	597	169	223	185	92	0.468	-1.095	0.00953762	0.0469837	down	SMEL3Ch01	133204082	133207691	+	SMEL_001g150900.1.01	--	--	PREDICTED: protein XRI1-like [Solanum tuberosum]	RecName: Full=Protein XRI1; AltName: Full=Protein X-RAY INDUCED 1;	SubName: Full=Uncharacterized protein {ECO:0000313|EnsemblPlants:Solyc01g005010.2.1};	--	GO:0005634,nucleus; GO:0006281,DNA repair; GO:0007143,female meiotic nuclear division; GO:0007140,male meiotic nuclear division; GO:0009555,pollen development; GO:0010165,response to X-ray	--
SMEL_001g150960.1	0.02	0	0	0.05	0.18	0.45	1	0	0	2	8	18	31.347	4.97	0.00179356	0.0130949	up	SMEL3Ch01	133299726	133303943	-	SMEL_001g150960.1.01	--	K04733 interleukin-1 receptor-associated kinase 4 [EC:2.7.11.1] | (RefSeq) S-locus lectin kinase family protein (A)	PREDICTED: G-type lectin S-receptor-like serine/threonine-protein kinase At1g11330 isoform X1 [Solanum tuberosum]	RecName: Full=G-type lectin S-receptor-like serine/threonine-protein kinase At1g11330; EC=2.7.11.1; Flags: Precursor;	SubName: Full=Uncharacterized protein {ECO:0000313|EnsemblPlants:PGSC0003DMT400058657};	--	GO:0016021,integral component of membrane; GO:0005886,plasma membrane; GO:0005524,ATP binding; GO:0005516,calmodulin binding; GO:0030246,carbohydrate binding; GO:0004674,protein serine/threonine kinase activity; GO:0006468,protein phosphorylation; GO:0048544,recognition of pollen	Protein kinase domain
SMEL_001g151180.1	11.71	7.64	4.29	3.16	2.28	1.71	334	242	120	84	68	45	0.336	-1.575	2.53207e-05	0.000419184	down	SMEL3Ch01	133499598	133506848	-	SMEL_001g151180.1.01	--	K18886 gibberellin A4 carboxyl methyltransferase [EC:2.1.1.276] | (RefSeq) probable S-adenosylmethionine-dependent methyltransferase At5g38100 (A)	PREDICTED: probable S-adenosylmethionine-dependent methyltransferase At5g38100 [Solanum tuberosum]	RecName: Full=Probable S-adenosylmethionine-dependent methyltransferase At5g38100; EC=2.1.1.-;	SubName: Full=probable S-adenosylmethionine-dependent methyltransferase At5g38100 {ECO:0000313|RefSeq:XP_016537447.1};	--	GO:0046872,metal ion binding; GO:0008168,methyltransferase activity	SAM dependent carboxyl methyltransferase
SMEL_001g151190.1	32.58	33.08	14.58	8.65	1.71	3.75	545	615	239	135	30	58	0.194	-2.366	2.09645e-06	5.02442e-05	down	SMEL3Ch01	133511578	133514264	+	SMEL_001g151190.1.01	--	K18848 indole-3-acetate O-methyltransferase [EC:2.1.1.278] | (RefSeq) probable S-adenosylmethionine-dependent methyltransferase At5g38100 (A)	PREDICTED: probable S-adenosylmethionine-dependent methyltransferase At5g38100 [Capsicum annuum]	RecName: Full=Probable S-adenosylmethionine-dependent methyltransferase At5g38780; EC=2.1.1.-;	SubName: Full=probable S-adenosylmethionine-dependent methyltransferase At5g38100 {ECO:0000313|RefSeq:XP_016537447.1};	--	GO:0046872,metal ion binding; GO:0008168,methyltransferase activity	SAM dependent carboxyl methyltransferase
SMEL_001g151230.1	8.88	8.91	8.41	2.88	3.26	3.43	182	203	169	55	70	65	0.403	-1.311	9.98477e-10	6.08864e-08	down	SMEL3Ch01	133537686	133540686	-	SMEL_001g151230.1.01	--	K05933 aminocyclopropanecarboxylate oxidase [EC:1.14.17.4] | (RefSeq) 1-aminocyclopropane-1-carboxylate oxidase-like (A)	PREDICTED: 2-oxoglutarate-dependent dioxygenase AOP2-like [Capsicum annuum]	RecName: Full=Probable 2-oxoglutarate-dependent dioxygenase AOP1.2; EC=1.14.11.-;	SubName: Full=Uncharacterized protein {ECO:0000313|EMBL:PHT93647.1};	Iron/ascorbate family oxidoreductases	GO:0051213,dioxygenase activity; GO:0046872,metal ion binding	2OG-Fe(II) oxygenase superfamily
SMEL_001g151290.1	11.49	10.83	7.02	4.47	4.03	2.23	212	222	127	77	78	38	0.405	-1.304	2.04877e-05	0.000354851	down	SMEL3Ch01	133594951	133597963	-	SMEL_001g151290.1.01	--	--	PREDICTED: uncharacterized protein C594.04c-like [Solanum tuberosum]	--	SubName: Full=Uncharacterized protein {ECO:0000313|EnsemblPlants:PGSC0003DMT400051424};	Predicted steroid reductase	GO:0005737,cytoplasm; GO:0016021,integral component of membrane; GO:0016627,oxidoreductase activity, acting on the CH-CH group of donors; GO:0006629,lipid metabolic process	Protein of unknown function (DUF1295)
SMEL_001g151700.1	181.75	157.9	141.64	71.97	51.31	69.6	2553	2465	1950	943	755	904	0.442	-1.177	3.38778e-11	2.69596e-09	down	SMEL3Ch01	134170940	134171856	-	SMEL_001g151700.1.01	--	--	PREDICTED: protein YLS9-like [Solanum tuberosum]	RecName: Full=NDR1/HIN1-like protein 1 {ECO:0000303|Ref.1};	SubName: Full=Uncharacterized protein {ECO:0000313|EnsemblPlants:PGSC0003DMT400042351};	--	GO:0046658,anchored component of plasma membrane; GO:0016021,integral component of membrane; GO:0009506,plasmodesma; GO:0004871,NA; GO:0051607,defense response to virus	Late embryogenesis abundant protein
SMEL_001g151760.1	2.1	1.76	3.1	1.07	0.51	0.53	103	96	149	49	26	24	0.326	-1.615	7.02103e-05	0.00096991	down	SMEL3Ch01	134217479	134220499	+	SMEL_001g151760.1.01	--	K00549 5-methyltetrahydropteroyltriglutamate--homocysteine methyltransferase [EC:2.1.1.14] | (RefSeq) protein QUIRKY-like (A)	PREDICTED: protein QUIRKY [Solanum tuberosum]	RecName: Full=Protein QUIRKY {ECO:0000303|PubMed:19180193};	SubName: Full=Uncharacterized protein {ECO:0000313|EnsemblPlants:PGSC0003DMT400054936};	--	GO:0016021,integral component of membrane; GO:0005886,plasma membrane; GO:0009506,plasmodesma; GO:0016757,transferase activity, transferring glycosyl groups; GO:0099402,plant organ development	Plant phosphoribosyltransferase C-terminal
SMEL_001g151830.1	100.75	103.51	121.32	149.15	250.77	219.15	2108	2407	2488	2911	5497	4240	2.093	1.066	1.35492e-05	0.000251814	up	SMEL3Ch01	134275864	134279212	-	SMEL_001g151830.1.01	--	K03283 heat shock 70kDa protein 1/2/6/8 | (RefSeq) heat shock cognate 70 kDa protein 2-like (A)	PREDICTED: uncharacterized protein LOC102578879 isoform X1 [Solanum tuberosum]	--	SubName: Full=Uncharacterized protein {ECO:0000313|EnsemblPlants:PGSC0003DMT400055040};	--	--	Lecithin retinol acyltransferase
SMEL_001g152320.1	14.9	17.7	8.51	7.34	5.51	3.28	359	474	201	165	139	73	0.434	-1.204	0.000338714	0.00345709	down	SMEL3Ch01	135000982	135002463	+	SMEL_001g152320.1.01	--	K23260 scopoletin glucosyltransferase [EC:2.4.1.128] | (RefSeq) scopoletin glucosyltransferase-like (A)	PREDICTED: UDP-glycosyltransferase 92A1-like [Solanum tuberosum]	RecName: Full=UDP-glycosyltransferase 92A1; EC=2.4.1.-;	SubName: Full=Uncharacterized protein {ECO:0000313|EnsemblPlants:PGSC0003DMT400055011};	UDP-glucuronosyl and UDP-glucosyl transferase	GO:0043231,intracellular membrane-bounded organelle; GO:0080043,quercetin 3-O-glucosyltransferase activity; GO:0080044,quercetin 7-O-glucosyltransferase activity; GO:0008152,metabolic process	UDP-glucoronosyl and UDP-glucosyl transferase
SMEL_001g152370.1	0.28	0.26	0.04	0.04	0.02	0.04	32	33	5	4	2	4	0.176	-2.507	0.00320047	0.0204036	down	SMEL3Ch01	135042203	135051220	-	SMEL_001g152370.1.01	--	K03781 catalase [EC:1.11.1.6] | (RefSeq) uncharacterized protein y4iK-like (A)	PREDICTED: uncharacterized protein LOC107016453 [Solanum pennellii]	RecName: Full=4-coumarate--CoA ligase-like 2; EC=6.2.1.-;	SubName: Full=Uncharacterized protein {ECO:0000313|EnsemblPlants:PGSC0003DMT400055104};	Predicted AMP-binding protein	GO:0005777,peroxisome; GO:0005524,ATP binding; GO:0016874,ligase activity; GO:0008152,metabolic process	AMP-binding enzyme
SMEL_001g152420.1	319.41	337.63	329.55	507.01	846.86	785.8	6408	7528	6480	9488	17799	14577	2.399	1.262	4.17227e-08	1.63178e-06	up	SMEL3Ch01	135093331	135095694	+	SMEL_001g152420.1.01	--	K05278 flavonol synthase [EC:1.14.11.23] | (RefSeq) putative inactive flavonol synthase 2 (A)	PREDICTED: probable 2-oxoglutarate-dependent dioxygenase AOP1 [Solanum pennellii]	RecName: Full=Probable 2-oxoglutarate-dependent dioxygenase AOP1.2; EC=1.14.11.-;	SubName: Full=Uncharacterized protein {ECO:0000313|EnsemblPlants:Solyc02g062500.2.1};	Iron/ascorbate family oxidoreductases	GO:0051213,dioxygenase activity; GO:0046872,metal ion binding	2OG-Fe(II) oxygenase superfamily
SMEL_001g152550.1	26.8	30.04	21.74	32.5	64.86	57.1	366	456	291	414	928	721	2.19	1.131	7.38561e-05	0.00101348	up	SMEL3Ch01	135361746	135362891	+	SMEL_001g152550.1.01	--	--	PREDICTED: uncharacterized protein LOC102591817 isoform X1 [Solanum tuberosum]	--	SubName: Full=Uncharacterized protein {ECO:0000313|EnsemblPlants:PGSC0003DMT400082014};	--	--	--
SMEL_001g152590.1	0.29	0.34	0.23	0.54	0.88	1.03	9	12	7	16	29	30	3.182	1.67	0.00158903	0.0118837	up	SMEL3Ch01	135402022	135411085	+	SMEL_001g152590.1.01	--	--	PREDICTED: formin-like protein 20 isoform X1 [Capsicum annuum]	--	SubName: Full=formin-like protein 20 isoform X1 {ECO:0000313|RefSeq:XP_016576398.1};	--	--	--
SMEL_001g152620.1	35.94	35.47	38.79	106.28	173.84	228.79	641	703	678	1768	3248	3773	5.116	2.355	9.06331e-16	1.59661e-13	up	SMEL3Ch01	135422528	135424550	+	SMEL_001g152620.1.01	--	--	PREDICTED: unconventional myosin-XVI-like isoform X3 [Capsicum annuum]	--	SubName: Full=unconventional myosin-XVI-like isoform X3 {ECO:0000313|RefSeq:XP_016576078.1};	--	--	--
SMEL_001g152710.1	10.11	13.98	10.05	4.4	4.37	3.87	192	295	187	78	87	68	0.409	-1.29	1.0891e-08	4.9883e-07	down	SMEL3Ch01	135634078	135637358	+	SMEL_001g152710.1.01	--	K00430 peroxidase [EC:1.11.1.7] | (RefSeq) CEVI-1; peroxidase (A)	peroxidase precursor [Solanum lycopersicum]	RecName: Full=Lignin-forming anionic peroxidase; EC=1.11.1.7; AltName: Full=TOPA; Flags: Precursor;	RecName: Full=Peroxidase {ECO:0000256|RuleBase:RU362060, ECO:0000256|SAAS:SAAS00709852}; EC=1.11.1.7 {ECO:0000256|RuleBase:RU362060, ECO:0000256|SAAS:SAAS00709852};	--	GO:0005576,extracellular region; GO:0020037,heme binding; GO:0046872,metal ion binding; GO:0004601,peroxidase activity; GO:0042744,hydrogen peroxide catabolic process; GO:0006979,response to oxidative stress	Peroxidase
SMEL_001g153010.1	9.73	13.87	5.47	0.59	0.26	0.24	178	282	98	10	5	4	0.041	-4.602	5.29688e-20	1.85041e-17	down	SMEL3Ch01	135950465	135953013	+	SMEL_001g153010.1.01	--	K02291 15-cis-phytoene/all-trans-phytoene synthase [EC:2.5.1.32 2.5.1.99] | (RefSeq) phytoene synthase 2, chloroplastic-like (A)	PREDICTED: phytoene synthase 2, chloroplastic-like [Solanum tuberosum]	RecName: Full=Phytoene synthase 1, chloroplastic; EC=2.5.1.32; AltName: Full=Fruit-ripening-specific protein pTOM5; Flags: Precursor;	SubName: Full=phytoene synthase 2, chloroplastic-like {ECO:0000313|RefSeq:XP_016576229.1};	Squalene synthetase	GO:0009507,chloroplast; GO:0004310,farnesyl-diphosphate farnesyltransferase activity; GO:0016767,geranylgeranyl-diphosphate geranylgeranyltransferase activity; GO:0051996,squalene synthase activity; GO:0016117,carotenoid biosynthetic process; GO:0006696,ergosterol biosynthetic process	Squalene/phytoene synthase
SMEL_001g153310.1	8.33	5.69	1.8	1.2	0.31	0.61	104	79	22	14	4	7	0.148	-2.754	2.51694e-05	0.00041735	down	SMEL3Ch01	136436463	136437230	+	SMEL_001g153310.1.01	--	K09286 EREBP-like factor | (RefSeq) ethylene-responsive transcription factor RAP2-11-like (A)	PREDICTED: ethylene-responsive transcription factor RAP2-11-like [Capsicum annuum]	RecName: Full=Ethylene-responsive transcription factor RAP2-11; AltName: Full=Protein RELATED TO APETALA2 11;	SubName: Full=ethylene-responsive transcription factor RAP2-11-like {ECO:0000313|RefSeq:XP_016582086.1};	--	GO:0005634,nucleus; GO:0003700,DNA-binding transcription factor activity; GO:0043565,sequence-specific DNA binding; GO:0035865,cellular response to potassium ion; GO:0009873,ethylene-activated signaling pathway; GO:0048528,post-embryonic root development; GO:0009723,response to ethylene; GO:0000302,response to reactive oxygen species; GO:0006351,transcription, DNA-templated	AP2 domain
SMEL_002g153410.1	12.3	9.95	7.15	3.17	2.97	1.6	158	142	90	38	40	19	0.292	-1.776	1.10185e-07	3.79771e-06	down	SMEL3Ch02	642994	644215	+	SMEL_002g153410.1.01	--	K02641 ferredoxin--NADP+ reductase [EC:1.18.1.2] | (RefSeq) ferredoxin--NADP reductase, leaf-type isozyme, chloroplastic-like (A)	PREDICTED: ferredoxin--NADP reductase, leaf-type isozyme, chloroplastic-like [Solanum pennellii]	RecName: Full=Ferredoxin--NADP reductase, leaf isozyme 1, chloroplastic; Short=FNR; EC=1.18.1.2 {ECO:0000250|UniProtKB:Q9FKW6}; AltName: Full=Leaf FNR 1 {ECO:0000305}; Short=FNR-1 {ECO:0000305}; Short=Os-LFNR1 {ECO:0000305}; Flags: Precursor;	RecName: Full=Ferredoxin--NADP reductase {ECO:0000256|RuleBase:RU004465}; EC=1.18.1.2 {ECO:0000256|RuleBase:RU004465};	NADP/FAD dependent oxidoreductase	GO:0009570,chloroplast stroma; GO:0098807,chloroplast thylakoid membrane protein complex; GO:0004324,ferredoxin-NADP+ reductase activity; GO:0015979,photosynthesis	Oxidoreductase NAD-binding domain
SMEL_002g153470.1	3.06	2.8	1.44	0.92	0.75	0.73	117	119	54	33	30	26	0.367	-1.447	4.36516e-05	0.000659812	down	SMEL3Ch02	1625068	1627422	+	SMEL_002g153470.1.01	--	K15333 tRNA guanosine-2'-O-methyltransferase [EC:2.1.1.34] | (RefSeq) uncharacterized protein LOC104224633 (A)	PREDICTED: subtilisin-like protease SBT1.7 [Solanum tuberosum]	RecName: Full=Subtilisin-like protease SBT1.5 {ECO:0000303|PubMed:16193095}; EC=3.4.21.- {ECO:0000255|PROSITE-ProRule:PRU10082}; AltName: Full=Subtilase subfamily 1 member 5 {ECO:0000303|PubMed:16193095}; Short=AtSBT1.5 {ECO:0000303|PubMed:16193095}; Flags: Precursor;	SubName: Full=Subtilisin-like protease SBT1.7 {ECO:0000313|EMBL:PHT93355.1};	--	GO:0005576,extracellular region; GO:0004252,serine-type endopeptidase activity	Subtilase family
SMEL_002g154110.1	0	0	0	0.63	5.59	5.7	0	0	0	1	10	9	42.465	5.408	0.00195469	0.0140129	up	SMEL3Ch02	10856583	10856687	-	SMEL_002g154110.1.01	--	--	Cytochrome c biogenesis CcmF C-terminal-like mitochondrial protein [Capsicum chinense]	--	SubName: Full=Cytochrome c biogenesis CcmF C-terminal-like mitochondrial protein {ECO:0000313|EMBL:PHU21506.1};	--	--	--
SMEL_002g155270.1	6.34	5.7	5.67	15.34	15.61	13.98	202	202	177	456	521	412	2.798	1.484	9.99013e-23	5.14767e-20	up	SMEL3Ch02	25389447	25395378	+	SMEL_002g155270.1.01	--	K15402 fatty acid omega-hydroxylase [EC:1.14.-.-] | (RefSeq) cytochrome P450 86B1-like (A)	Cytochrome 86B1 [Capsicum baccatum]	RecName: Full=Cytochrome P450 86B1; EC=1.14.-.-;	SubName: Full=Cytochrome 86B1 {ECO:0000313|EMBL:PHT54921.1};	Cytochrome P450 CYP4/CYP19/CYP26 subfamilies	GO:0005783,endoplasmic reticulum; GO:0005789,endoplasmic reticulum membrane; GO:0016021,integral component of membrane; GO:0020037,heme binding; GO:0005506,iron ion binding; GO:0004497,monooxygenase activity; GO:0016705,oxidoreductase activity, acting on paired donors, with incorporation or reduction of molecular oxygen; GO:0071555,cell wall organization; GO:0010345,suberin biosynthetic process; …	Cytochrome P450
SMEL_002g156150.1	29.95	30.65	80.46	93.45	92.53	93.07	837	952	2204	2436	2709	2405	2.122	1.086	0.0059189	0.0329181	up	SMEL3Ch02	31244048	31253743	-	SMEL_002g156150.1.01	--	K19366 spartin | (RefSeq) uncharacterized LOC102584895 (A)	PREDICTED: uncharacterized protein LOC102584895 [Solanum tuberosum]	RecName: Full=Protein EARLY-RESPONSIVE TO DEHYDRATION 7, chloroplastic {ECO:0000303|PubMed:8075396}; Flags: Precursor;	SubName: Full=Uncharacterized protein {ECO:0000313|EnsemblPlants:PGSC0003DMT400061367};	--	GO:0009507,chloroplast; GO:0005886,plasma membrane; GO:0007623,circadian rhythm; GO:0009737,response to abscisic acid; GO:0009409,response to cold; GO:0009644,response to high light intensity; GO:0009651,response to salt stress; GO:0009414,response to water deprivation	Senescence-associated protein
SMEL_002g157500.1	13.28	12.31	6.18	2.48	1.28	1.45	298	307	136	52	30	30	0.181	-2.462	6.91628e-12	6.42124e-10	down	SMEL3Ch02	43364569	43366501	-	SMEL_002g157500.1.01	--	K14709 solute carrier family 39 (zinc transporter), member 1/2/3 | (RefSeq) zinc transporter 8-like (A)	Zinc transporter 5 [Capsicum chinense]	RecName: Full=Zinc transporter 5; AltName: Full=ZRT/IRT-like protein 5; Short=OsZIP5; Flags: Precursor;	SubName: Full=Zinc transporter 5 {ECO:0000313|EMBL:PHU03438.1};	Fe2+/Zn2+ regulated transporter	GO:0016021,integral component of membrane; GO:0005886,plasma membrane; GO:0005385,zinc ion transmembrane transporter activity; GO:0071577,zinc ion transmembrane transport; GO:0006829,zinc ion transport	ZIP Zinc transporter
SMEL_002g157570.1	1.46	1.84	2.39	0	0	0	5	7	8	0	0	0	0.032	-4.963	0.00175179	0.0128721	down	SMEL3Ch02	43898244	43898453	-	SMEL_002g157570.1.01	--	K01728 pectate lyase [EC:4.2.2.2] | (RefSeq) pectate lyase-like (A)	PREDICTED: probable pectate lyase P59 [Solanum lycopersicum]	RecName: Full=Probable pectate lyase P59; EC=4.2.2.2; Flags: Precursor;	SubName: Full=Uncharacterized protein {ECO:0000313|EnsemblPlants:Solyc02g031960.2.1};	--	GO:0046872,metal ion binding; GO:0030570,pectate lyase activity; GO:0045490,pectin catabolic process	Pectate lyase, N terminus
SMEL_002g157990.1	10.6	8.93	6.27	38.26	37.29	38.11	188	176	109	633	693	625	4.887	2.289	4.8437e-33	1.10926e-29	up	SMEL3Ch02	46694055	46696102	+	SMEL_002g157990.1.01	--	K18819 inositol 3-alpha-galactosyltransferase [EC:2.4.1.123] | (RefSeq) galactinol synthase 2-like (A)	PREDICTED: galactinol synthase 2-like [Nicotiana tomentosiformis]	RecName: Full=Galactinol synthase 2; Short=GolS-2; Short=SlGolS2; EC=2.4.1.123;	RecName: Full=Hexosyltransferase {ECO:0000256|RuleBase:RU362027}; EC=2.4.1.- {ECO:0000256|RuleBase:RU362027};	Glycosyl transferase, family 8 - glycogenin	GO:0005737,cytoplasm; GO:0047216,inositol 3-alpha-galactosyltransferase activity; GO:0046872,metal ion binding; GO:0006012,galactose metabolic process	Glycosyl transferase family 8
SMEL_002g158430.1	10.15	9.86	4.53	4.27	1.12	0.69	112	121	49	44	13	7	0.271	-1.881	0.00195942	0.0140374	down	SMEL3Ch02	51739998	51740676	-	SMEL_002g158430.1.01	--	K20855 beta-1,3-galactosyltransferase 1/2/3/4/5/7/8 [EC:2.4.1.-] | (RefSeq) probable beta-1,3-galactosyltransferase 2 (A)	PREDICTED: uncharacterized protein LOC102599997 isoform X1 [Solanum tuberosum]	--	SubName: Full=Uncharacterized protein {ECO:0000313|EnsemblPlants:Solyc02g032800.1.1};	--	--	Senescence regulator
SMEL_002g158590.1	4.28	2.51	1.71	0.8	0.44	0.6	46	30	18	8	5	6	0.24	-2.058	0.000479948	0.00458822	down	SMEL3Ch02	54325600	54326807	-	SMEL_002g158590.1.01	--	K02641 ferredoxin--NADP+ reductase [EC:1.18.1.2] | (RefSeq) ferredoxin--NADP reductase, leaf-type isozyme, chloroplastic-like (A)	PREDICTED: ferredoxin--NADP reductase, leaf-type isozyme, chloroplastic-like [Solanum tuberosum]	RecName: Full=Ferredoxin--NADP reductase, leaf-type isozyme, chloroplastic; Short=FNR; EC=1.18.1.2; Flags: Precursor;	RecName: Full=Ferredoxin--NADP reductase {ECO:0000256|RuleBase:RU004465}; EC=1.18.1.2 {ECO:0000256|RuleBase:RU004465};	NADP/FAD dependent oxidoreductase	GO:0009570,chloroplast stroma; GO:0009535,chloroplast thylakoid membrane; GO:0004324,ferredoxin-NADP+ reductase activity; GO:0015979,photosynthesis	--
SMEL_002g158770.1	13.68	14.95	16.56	7.75	7.17	5.63	284	345	337	150	156	108	0.498	-1.006	1.82018e-06	4.42403e-05	down	SMEL3Ch02	55366843	55370969	-	SMEL_002g158770.1.01	--	K12472 epidermal growth factor receptor substrate 15 | (RefSeq) filaggrin-like (A)	PREDICTED: BURP domain-containing protein 3-like [Solanum tuberosum]	RecName: Full=BURP domain-containing protein 3; Short=OsBURP03; Flags: Precursor;	SubName: Full=Uncharacterized protein {ECO:0000313|EnsemblPlants:PGSC0003DMT400051337};	--	--	BURP domain
SMEL_002g158850.1	3.48	2.17	2.36	19.4	45.86	26.42	39	27	26	203	539	274	12.731	3.67	9.84081e-22	4.71695e-19	up	SMEL3Ch02	55820514	55821723	-	SMEL_002g158850.1.01	--	--	PREDICTED: dehydrin Xero 1-like [Solanum tuberosum]	--	SubName: Full=Uncharacterized protein {ECO:0000313|EnsemblPlants:PGSC0003DMT400084487};	--	GO:0006950,response to stress; GO:0009415,response to water	Dehydrin
SMEL_002g158930.1	11.48	10.09	8.18	3.32	1.3	1.28	126	123	88	34	15	13	0.217	-2.203	2.10858e-08	9.09205e-07	down	SMEL3Ch02	56209162	56210293	+	SMEL_002g158930.1.01	--	K12472 epidermal growth factor receptor substrate 15 | (RefSeq) filaggrin-like (A)	PREDICTED: BURP domain-containing protein 5-like [Solanum tuberosum]	RecName: Full=BURP domain-containing protein 3; Short=OsBURP03; Flags: Precursor;	SubName: Full=Uncharacterized protein {ECO:0000313|EnsemblPlants:PGSC0003DMT400075105};	--	--	BURP domain
SMEL_002g159370.1	0.62	0.81	0.5	0.22	0.12	0.04	15	22	12	5	3	1	0.217	-2.203	0.00402448	0.0244758	down	SMEL3Ch02	57888761	57890349	-	SMEL_002g159370.1.01	--	K08150 MFS transporter, SP family, solute carrier family 2 (myo-inositol transporter), member 13 | (RefSeq) inositol transporter 1-like (A)	PREDICTED: probable polyol transporter 6 [Solanum tuberosum]	RecName: Full=Probable polyol transporter 6;	SubName: Full=Uncharacterized protein {ECO:0000313|EnsemblPlants:Solyc02g062870.2.1};	Predicted transporter (major facilitator superfamily)	GO:0016021,integral component of membrane; GO:0005355,glucose transmembrane transporter activity; GO:0005351,carbohydrate:proton symporter activity; GO:0046323,glucose import; GO:0035428,NA	Sugar (and other) transporter
SMEL_002g159530.1	13.43	11.85	5.56	2.44	0.98	1.58	313	307	127	53	24	34	0.18	-2.477	6.56957e-10	4.14084e-08	down	SMEL3Ch02	58360187	58362496	+	SMEL_002g159530.1.01	--	K12356 coniferyl-alcohol glucosyltransferase [EC:2.4.1.111] | (RefSeq) anthocyanidin 3-O-glucosyltransferase 5-like (A)	PREDICTED: anthocyanidin 3-O-glucosyltransferase 5-like [Nicotiana tomentosiformis]	RecName: Full=Anthocyanidin 3-O-glucosyltransferase 5; EC=2.4.1.115; AltName: Full=Flavonol 3-O-glucosyltransferase 5; AltName: Full=UDP-glucose flavonoid 3-O-glucosyltransferase 5;	RecName: Full=Glycosyltransferase {ECO:0000256|RuleBase:RU362057}; EC=2.4.1.- {ECO:0000256|RuleBase:RU362057};	UDP-glucuronosyl and UDP-glucosyl transferase	GO:0047213,anthocyanidin 3-O-glucosyltransferase activity; GO:0009718,anthocyanin-containing compound biosynthetic process	UDP-glucoronosyl and UDP-glucosyl transferase
SMEL_002g159750.1	42.51	33.64	32.29	12.31	9.33	7.13	548	482	408	148	126	85	0.292	-1.778	5.19402e-15	8.42944e-13	down	SMEL3Ch02	59127026	59127994	+	SMEL_002g159750.1.01	--	K01602 ribulose-bisphosphate carboxylase small chain [EC:4.1.1.39] | (RefSeq) ribulose bisphosphate carboxylase small chain 8B, chloroplastic (A)	Ribulose bisphosphate carboxylase small chain 3, chloroplastic [Capsicum chinense]	RecName: Full=Ribulose bisphosphate carboxylase small chain 3, chloroplastic; Short=RuBisCO small subunit 3; EC=4.1.1.39; Flags: Precursor;	RecName: Full=Ribulose bisphosphate carboxylase small chain {ECO:0000256|RuleBase:RU003627}; EC=4.1.1.39 {ECO:0000256|RuleBase:RU003627};	--	GO:0009507,chloroplast; GO:0004497,monooxygenase activity; GO:0016984,ribulose-bisphosphate carboxylase activity; GO:0009853,photorespiration; GO:0019253,reductive pentose-phosphate cycle	Ribulose bisphosphate carboxylase, small chain
SMEL_002g159840.1	0.38	0.35	0.52	1.37	1.34	0.9	6	6	8	20	22	13	3.18	1.669	0.00403313	0.024514	up	SMEL3Ch02	59327576	59328537	+	SMEL_002g159840.1.01	--	K10760 adenylate dimethylallyltransferase (cytokinin synthase) [EC:2.5.1.27 2.5.1.112] | (RefSeq) uncharacterized LOC104439822 (A)	PREDICTED: uncharacterized protein LOC102602487 [Solanum tuberosum]	--	SubName: Full=Uncharacterized protein {ECO:0000313|EnsemblPlants:PGSC0003DMT400026996};	--	--	--
SMEL_002g159870.1	1.75	1.68	9.77	34.29	44.8	54.99	29	31	159	531	779	844	10.776	3.43	0.000103593	0.00133949	up	SMEL3Ch02	59373606	59375251	+	SMEL_002g159870.1.01	--	K07304 peptide-methionine (S)-S-oxide reductase [EC:1.8.4.11] | (RefSeq) peptide methionine sulfoxide reductase MsrA 1-like (A)	PREDICTED: peptide methionine sulfoxide reductase MsrA 1-like [Solanum tuberosum]	RecName: Full=Peptide methionine sulfoxide reductase A3; Short=AtMSRA3; EC=1.8.4.11; AltName: Full=Peptide-methionine (S)-S-oxide reductase; Short=Peptide Met(O) reductase; AltName: Full=Protein-methionine-S-oxide reductase;	SubName: Full=Uncharacterized protein {ECO:0000313|EnsemblPlants:PGSC0003DMT400026994};	Peptide methionine sulfoxide reductase	GO:0005829,cytosol; GO:0008113,peptide-methionine (S)-S-oxide reductase activity; GO:0009416,response to light stimulus	Peptide methionine sulfoxide reductase
SMEL_002g159950.1	13.32	14.21	24.53	23.12	43.53	33.77	113	134	204	183	387	265	2.106	1.074	0.00282667	0.0185662	up	SMEL3Ch02	59661992	59665736	+	SMEL_002g159950.1.01	--	--	PREDICTED: uncharacterized protein LOC101254057 [Solanum lycopersicum]	--	SubName: Full=Putative ovule protein {ECO:0000313|EMBL:JAP14084.1};	--	--	--
SMEL_002g160020.1	4.59	5.36	3.36	2.06	1.6	1.74	134	174	96	56	49	47	0.448	-1.158	1.13782e-05	0.000216483	down	SMEL3Ch02	59934405	59937786	+	SMEL_002g160020.1.01	--	K04733 interleukin-1 receptor-associated kinase 4 [EC:2.7.11.1] | (RefSeq) pto-interacting protein 1-like isoform X1 (A)	PREDICTED: serine/threonine-protein kinase CDL1-like [Solanum tuberosum]	RecName: Full=Probable serine/threonine-protein kinase PBL7 {ECO:0000305}; EC=2.7.11.1 {ECO:0000269|PubMed:21855796}; AltName: Full=CDG1-like protein 1 {ECO:0000303|PubMed:21855796}; AltName: Full=PBS1-like protein 7 {ECO:0000303|PubMed:20413097};	SubName: Full=Uncharacterized protein {ECO:0000313|EnsemblPlants:PGSC0003DMT400026989};	Serine/threonine protein kinase	GO:0005886,plasma membrane; GO:0005524,ATP binding; GO:0004675,transmembrane receptor protein serine/threonine kinase activity; GO:0009742,brassinosteroid mediated signaling pathway; GO:0007166,cell surface receptor signaling pathway; GO:1900459,positive regulation of brassinosteroid mediated signaling pathway; GO:0006468,protein phosphorylation	Protein kinase domain
SMEL_002g160060.1	135.38	100.33	136.55	189.09	316.22	188.93	964	794	953	1256	2359	1244	2.048	1.034	0.000117468	0.00148445	up	SMEL3Ch02	60001104	60001541	+	SMEL_002g160060.1.01	--	K13448 calcium-binding protein CML | (RefSeq) probable calcium-binding protein CML18 (A)	PREDICTED: probable calcium-binding protein CML18 [Solanum pennellii]	RecName: Full=Probable calcium-binding protein CML23; AltName: Full=Calmodulin-like protein 23;	SubName: Full=Uncharacterized protein {ECO:0000313|EnsemblPlants:Solyc02g063350.1.1};	Calmodulin and related proteins (EF-Hand superfamily)	GO:0005509,calcium ion binding; GO:0009909,regulation of flower development; GO:0080164,regulation of nitric oxide metabolic process	EF hand
SMEL_002g160170.1	93.03	88.91	64.59	37.73	31.32	30.36	6112	6492	4159	2312	2156	1844	0.446	-1.165	1.25261e-13	1.65497e-11	down	SMEL3Ch02	60302034	60309372	-	SMEL_002g160170.1.01	--	K12392 AP-1 complex subunit beta-1 | (RefSeq) beta-adaptin-like protein B isoform X1 (A)	PREDICTED: glycine-rich domain-containing protein 1-like isoform X2 [Solanum tuberosum]	RecName: Full=Glycine-rich domain-containing protein 2 {ECO:0000303|PubMed:25653657}; Short=AtGRDP2 {ECO:0000303|PubMed:25653657};	SubName: Full=Uncharacterized protein {ECO:0000313|EnsemblPlants:PGSC0003DMT400026933};	--	GO:0009734,auxin-activated signaling pathway; GO:0071470,cellular response to osmotic stress; GO:0010928,regulation of auxin mediated signaling pathway; GO:2000028,regulation of photoperiodism, flowering	Glycine-rich domain-containing protein-like
SMEL_002g160980.1	1.54	2.7	1.49	2.64	4.41	4.83	20	39	19	32	60	58	2.3	1.201	0.00450377	0.0266821	up	SMEL3Ch02	71260451	71262264	-	SMEL_002g160980.1.01	--	K19613 leucine-rich repeat protein SHOC2 | (RefSeq) putative disease resistance protein RGA3 (A)	PREDICTED: protein PHLOEM PROTEIN 2-LIKE A1-like isoform X1 [Solanum tuberosum]	RecName: Full=Lectin {ECO:0000303|PubMed:26597132}; AltName: Full=Agglutinin {ECO:0000303|PubMed:26597132}; Short=LAA {ECO:0000303|PubMed:26597132};	SubName: Full=protein PHLOEM PROTEIN 2-LIKE A1-like {ECO:0000313|RefSeq:XP_016558601.1};	--	GO:0030246,carbohydrate binding	Phloem protein 2
SMEL_002g161190.1	8.58	7.5	3.48	1.66	1.18	0.73	216	210	86	39	31	17	0.202	-2.304	1.2207e-08	5.49342e-07	down	SMEL3Ch02	72227889	72230094	-	SMEL_002g161190.1.01	--	--	PREDICTED: probable N-acetyltransferase HLS1 [Solanum pennellii]	RecName: Full=Probable N-acetyltransferase HLS1-like; EC=2.3.1.-;	SubName: Full=Uncharacterized protein {ECO:0000313|EnsemblPlants:PGSC0003DMT400033871};	--	GO:0008080,N-acetyltransferase activity; GO:0016747,transferase activity, transferring acyl groups other than amino-acyl groups; GO:0006473,protein acetylation	Acetyltransferase (GNAT) family
SMEL_002g161450.1	1.87	3.87	14.6	1.92	1.07	1.94	47	108	359	45	28	45	0.256	-1.968	0.00327754	0.0208306	down	SMEL3Ch02	73162696	73165014	-	SMEL_002g161450.1.01	--	--	PREDICTED: patatin-like protein 1 [Solanum lycopersicum]	RecName: Full=Patatin-like protein 1; EC=3.1.1.-;	RecName: Full=Patatin {ECO:0000256|RuleBase:RU361262}; EC=3.1.1.- {ECO:0000256|RuleBase:RU361262};	Ca2+-independent phospholipase A2	GO:0016787,hydrolase activity; GO:0006952,defense response; GO:0016042,lipid catabolic process	Patatin-like phospholipase
SMEL_002g161510.1	3.13	2.31	6.97	0.31	0.54	0.62	11	9	24	1	2	2	0.128	-2.962	0.00232392	0.0160125	down	SMEL3Ch02	73257732	73258341	-	SMEL_002g161510.1.01	--	--	hypothetical protein BC332_03669 [Capsicum chinense]	--	SubName: Full=Uncharacterized protein {ECO:0000313|EMBL:PHU25337.1};	--	--	--
SMEL_002g161630.1	5.71	6.27	22.61	30.92	28.18	30.39	100	122	388	505	517	492	2.754	1.462	0.0034459	0.0216799	up	SMEL3Ch02	73612852	73613928	+	SMEL_002g161630.1.01	--	K20716 mitogen-activated protein kinase kinase kinase 17/18 | (RefSeq) mitogen-activated protein kinase kinase kinase 18-like (A)	PREDICTED: mitogen-activated protein kinase kinase kinase 1-like [Solanum tuberosum]	RecName: Full=Mitogen-activated protein kinase kinase kinase 17 {ECO:0000303|PubMed:25720833}; EC=2.7.11.25 {ECO:0000250|UniProtKB:Q9ZVP5, ECO:0000255|PROSITE-ProRule:PRU00159};	SubName: Full=Uncharacterized protein {ECO:0000313|EnsemblPlants:PGSC0003DMT400065492};	MEKK and related serine/threonine protein kinases	GO:0005737,cytoplasm; GO:0005634,nucleus; GO:0005524,ATP binding; GO:0004709,MAP kinase kinase kinase activity; GO:0004674,protein serine/threonine kinase activity; GO:0004702,NA; GO:0009738,abscisic acid-activated signaling pathway; GO:0032147,activation of protein kinase activity; GO:0007346,regulation of mitotic cell cycle; GO:0009737,response to abscisic acid; GO:0006970,response to osmotic s…	Protein kinase domain
SMEL_002g161680.1	1.48	1.98	0.96	0.58	0.43	0.83	60	89	38	22	18	31	0.461	-1.118	0.00713517	0.0378752	down	SMEL3Ch02	73758243	73760831	-	SMEL_002g161680.1.01	--	K13420 LRR receptor-like serine/threonine-protein kinase FLS2 [EC:2.7.11.1] | (RefSeq) LRR receptor-like serine/threonine-protein kinase FLS2 isoform X1 (A)	PREDICTED: uncharacterized protein At4g06744-like [Capsicum annuum]	RecName: Full=Uncharacterized protein At4g06744; Flags: Precursor;	SubName: Full=uncharacterized protein At4g06744-like {ECO:0000313|RefSeq:XP_016558893.1};	--	GO:0005576,extracellular region	Leucine rich repeat
SMEL_002g161790.1	0.89	0.34	0	1.28	2.35	1.45	12	5	0	16	33	18	4.679	2.226	0.00761423	0.0397682	up	SMEL3Ch02	74096783	74099846	+	SMEL_002g161790.1.01	--	K20802 (R)-mandelonitrile lyase [EC:4.1.2.10] | (RefSeq) alpha-hydroxynitrile lyase (A)	PREDICTED: salicylic acid-binding protein 2-like [Solanum tuberosum]	RecName: Full=Salicylic acid-binding protein 2; Short=NtSABP2; EC=3.1.1.-; AltName: Full=Methyl salicylate esterase;	SubName: Full=Uncharacterized protein {ECO:0000313|EnsemblPlants:PGSC0003DMT400001995};	--	GO:0016298,lipase activity; GO:0080031,methyl salicylate esterase activity; GO:0009862,systemic acquired resistance, salicylic acid mediated signaling pathway	Alpha/beta hydrolase family
SMEL_002g161940.1	0	0	0	1.47	0	0.74	0	0	0	14	0	7	45.67	5.513	0.00687148	0.0369224	up	SMEL3Ch02	74462813	74464711	-	SMEL_002g161940.1.01	--	K03046 DNA-directed RNA polymerase subunit beta' [EC:2.7.7.6] | (RefSeq) uncharacterized protein LOC108945874 (A)	hypothetical protein M569_00222, partial [Genlisea aurea]	--	SubName: Full=Uncharacterized protein {ECO:0000313|EnsemblPlants:PGSC0003DMT400086496};	--	GO:0015935,small ribosomal subunit; GO:0003735,structural constituent of ribosome; GO:0006412,translation	--
SMEL_002g162400.1	5.72	5.66	4.45	2.06	1.48	1.32	122	134	93	41	33	26	0.338	-1.565	1.97578e-08	8.60947e-07	down	SMEL3Ch02	75244200	75248595	-	SMEL_002g162400.1.01	--	K12639 cytochrome P450 family 724 subfamily B polypeptide 1 [EC:1.14.13.-] | (RefSeq) cytochrome P450 724B1-like (A)	PREDICTED: protein trichome birefringence-like 19 [Solanum tuberosum]	RecName: Full=Protein trichome birefringence-like 19;	SubName: Full=Uncharacterized protein {ECO:0000313|EnsemblPlants:PGSC0003DMT400068305};	--	GO:0005794,Golgi apparatus; GO:0016021,integral component of membrane; GO:0016413,O-acetyltransferase activity; GO:0071554,cell wall organization or biogenesis	GDSL/SGNH-like Acyl-Esterase family found in Pmr5 and Cas1p
SMEL_002g162480.1	24.95	26.24	18.56	9.28	9.9	7.01	539	630	393	187	224	140	0.416	-1.267	1.49575e-10	1.05579e-08	down	SMEL3Ch02	75342655	75346107	-	SMEL_002g162480.1.01	--	K01076 abhydrolase domain-containing protein 17 [EC:3.1.2.22] | (RefSeq) alpha/beta hydrolase domain-containing protein 17C (A)	PREDICTED: protein ABHD17C-like [Solanum lycopersicum]	--	SubName: Full=Uncharacterized protein {ECO:0000313|EnsemblPlants:Solyc02g065700.2.1};	Predicted alpha/beta hydrolase	--	Serine aminopeptidase, S33
SMEL_002g162510.1	2.5	4.05	4.25	1.39	0.84	0.9	60	108	100	31	21	20	0.314	-1.67	1.21749e-05	0.000228958	down	SMEL3Ch02	75371900	75374593	-	SMEL_002g162510.1.01	--	K13379 reversibly glycosylated polypeptide / UDP-arabinopyranose mutase [EC:2.4.1.- 5.4.99.30] | (RefSeq) alpha-1,4-glucan-protein synthase [UDP-forming] 1-like (A)	PREDICTED: alpha-1,4-glucan-protein synthase [UDP-forming]	RecName: Full=Probable UDP-arabinopyranose mutase 2 {ECO:0000305}; EC=5.4.99.30 {ECO:0000250|UniProtKB:Q8H8T0}; AltName: Full=Reversibly glycosylated polypeptide 2 {ECO:0000303|PubMed:10580281}; Short=RGP2 {ECO:0000303|PubMed:10580281}; AltName: Full=UDP-L-arabinose mutase 2 {ECO:0000305}; AltName: Full=UDP-glucose:protein transglucosylase 2 {ECO:0000303|PubMed:10580281}; Short=UPTG 2 {ECO:000030…	SubName: Full=alpha-1,4-glucan-protein synthase [UDP-forming] 1-like {ECO:0000313|RefSeq:XP_016558978.1};	--	GO:0005618,cell wall; GO:0005576,extracellular region; GO:0005794,Golgi apparatus; GO:0009506,plasmodesma; GO:0052691,UDP-arabinopyranose mutase activity; GO:0071555,cell wall organization; GO:0030244,cellulose biosynthetic process; GO:0071669,plant-type cell wall organization or biogenesis; GO:0006486,protein glycosylation	Reversibly glycosylated polypeptide
SMEL_002g162530.1	1.05	1.66	1.4	3.05	10.57	12.48	20	35	26	54	210	219	7.068	2.821	4.25876e-08	1.66245e-06	up	SMEL3Ch02	75394398	75396190	-	SMEL_002g162530.1.01	--	K00145 N-acetyl-gamma-glutamyl-phosphate reductase [EC:1.2.1.38] | (RefSeq) phospholipase A1-IIbeta-like (A)	PREDICTED: phospholipase A1-II 1-like [Solanum tuberosum]	RecName: Full=Phospholipase A1-II 1; EC=3.1.1.-;	SubName: Full=Phospholipase A1-II 1 {ECO:0000313|EMBL:PHT55813.1};	Predicted lipase	GO:0005737,cytoplasm; GO:0008970,phospholipase A1 activity; GO:0016042,lipid catabolic process	Lipase (class 3)
SMEL_002g162550.1	324.71	310.19	136.95	114.25	98.99	78.12	1362	1446	563	447	435	303	0.421	-1.248	3.21612e-05	0.000511083	down	SMEL3Ch02	75425803	75426060	-	SMEL_002g162550.1.01	--	--	SPX domain-containing protein 4 [Capsicum baccatum]	RecName: Full=Protein RALF-like 27; Flags: Precursor;	SubName: Full=SPX domain-containing protein 4 {ECO:0000313|EMBL:PHT55173.1};	--	GO:0048046,apoplast; GO:0005622,intracellular; GO:0005179,hormone activity; GO:0004871,NA; GO:0019722,calcium-mediated signaling; GO:0007267,cell-cell signaling	--
SMEL_002g162720.1	58.32	60.62	37.73	8.86	4.09	5.86	1334	1541	846	189	98	124	0.133	-2.916	1.84476e-24	1.2454e-21	down	SMEL3Ch02	75821932	75823877	+	SMEL_002g162720.1.01	--	K04628 ceramide galactosyltransferase [EC:2.4.1.47] | (RefSeq) UDP-glycosyltransferase 83A1-like (A)	PREDICTED: UDP-glycosyltransferase 83A1-like [Solanum tuberosum]	RecName: Full=UDP-glycosyltransferase 83A1; EC=2.4.1.-;	RecName: Full=Glycosyltransferase {ECO:0000256|RuleBase:RU362057}; EC=2.4.1.- {ECO:0000256|RuleBase:RU362057};	UDP-glucuronosyl and UDP-glucosyl transferase	GO:0043231,intracellular membrane-bounded organelle; GO:0080043,quercetin 3-O-glucosyltransferase activity; GO:0080044,quercetin 7-O-glucosyltransferase activity; GO:0008152,metabolic process	UDP-glucoronosyl and UDP-glucosyl transferase
SMEL_002g162740.1	1.07	0.92	1.28	0.26	0.37	0.42	22	21	26	5	8	8	0.354	-1.499	0.00718106	0.038029	down	SMEL3Ch02	75854954	75857190	-	SMEL_002g162740.1.01	--	K16812 targeting protein for Xklp2 | (RefSeq) hypothetical protein (A)	PREDICTED: uncharacterized protein LOC107009585 isoform X2 [Solanum pennellii]	--	SubName: Full=Uncharacterized protein {ECO:0000313|EnsemblPlants:PGSC0003DMT400064724};	--	GO:0005874,microtubule; GO:0005819,spindle; GO:0032147,activation of protein kinase activity; GO:0060236,regulation of mitotic spindle organization	--
SMEL_002g162840.1	34.69	31.93	24.15	53.06	86.28	79.08	1553	1589	1060	2216	4047	3274	2.68	1.422	1.17734e-09	6.97306e-08	up	SMEL3Ch02	76488800	76493163	+	SMEL_002g162840.1.01	--	K05016 chloride channel 7 | (RefSeq) chloride channel protein CLC-b (A)	PREDICTED: chloride channel protein CLC-b [Solanum tuberosum]	RecName: Full=Chloride channel protein CLC-b; Short=AtCLC-b; AltName: Full=CBS domain-containing protein CBSCLC7;	RecName: Full=Chloride channel protein {ECO:0000256|RuleBase:RU361221};	Cl- channel CLC-7 and related proteins (CLC superfamily)	GO:0034707,chloride channel complex; GO:0009705,plant-type vacuole membrane; GO:0009671,nitrate:proton symporter activity; GO:0005247,voltage-gated chloride channel activity; GO:1902476,chloride transmembrane transport; GO:0034765,regulation of ion transmembrane transport	Voltage gated chloride channel
SMEL_002g163210.1	0.47	0.43	1.29	1.44	2.19	3.33	6	6	16	17	29	39	3.484	1.801	0.0047824	0.027974	up	SMEL3Ch02	77030617	77033111	+	SMEL_002g163210.1.01	--	K01673 carbonic anhydrase [EC:4.2.1.1] | (RefSeq) ca3; carbonic anhydrase (A)	Carbonic anhydrase [Capsicum chinense]	RecName: Full=Carbonic anhydrase, chloroplastic; EC=4.2.1.1; AltName: Full=Carbonate dehydratase; Flags: Precursor;	RecName: Full=Carbonic anhydrase {ECO:0000256|RuleBase:RU003956}; EC=4.2.1.1 {ECO:0000256|RuleBase:RU003956}; AltName: Full=Carbonate dehydratase {ECO:0000256|RuleBase:RU003956};	Predicted carbonic anhydrase involved in protection against oxidative damage	GO:0009570,chloroplast stroma; GO:0004089,carbonate dehydratase activity; GO:0008270,zinc ion binding; GO:0015976,carbon utilization	Carbonic anhydrase
SMEL_002g163600.1	2.85	2.61	2.42	5.19	6.06	4.6	53	54	44	90	118	79	2.222	1.152	7.5283e-06	0.000151381	up	SMEL3Ch02	77930502	77931644	-	SMEL_002g163600.1.01	--	K12823 ATP-dependent RNA helicase DDX5/DBP2 [EC:3.6.4.13] | (RefSeq) uncharacterized protein LOC113271800 (A)	PREDICTED: F-box protein DOR-like [Solanum tuberosum]	RecName: Full=Putative F-box protein At1g47790;	SubName: Full=Uncharacterized protein {ECO:0000313|EnsemblPlants:PGSC0003DMT400003658};	--	--	F-box associated domain
SMEL_002g163690.1	6.75	5.27	6.21	59.57	87.7	43.08	292	253	263	2402	3972	1722	11.472	3.52	7.43451e-38	2.55388e-34	up	SMEL3Ch02	78374887	78378391	-	SMEL_002g163690.1.01	--	K06617 raffinose synthase [EC:2.4.1.82] | (RefSeq) probable galactinol--sucrose galactosyltransferase 5 (A)	PREDICTED: probable galactinol--sucrose galactosyltransferase 5 [Solanum tuberosum]	RecName: Full=Probable galactinol--sucrose galactosyltransferase 5; EC=2.4.1.82; AltName: Full=Protein SEED IMBIBITION 1-LIKE; AltName: Full=Raffinose synthase 5;	SubName: Full=Uncharacterized protein {ECO:0000313|EnsemblPlants:PGSC0003DMT400001378};	--	GO:0009507,chloroplast; GO:0047274,galactinol-sucrose galactosyltransferase activity; GO:0005975,carbohydrate metabolic process; GO:0009737,response to abscisic acid; GO:0006979,response to oxidative stress; GO:0009414,response to water deprivation	Raffinose synthase or seed imbibition protein Sip1
SMEL_002g164140.1	22.64	23.41	17.92	11.36	7.68	8.58	1047	1203	812	490	372	367	0.476	-1.071	4.28282e-09	2.21792e-07	down	SMEL3Ch02	78779926	78789235	+	SMEL_002g164140.1.01	--	K17500 integrin-linked kinase-associated serine/threonine phosphatase 2C [EC:3.1.3.16] | (RefSeq) WAT1-related protein At3g18200 isoform X1 (A)	PREDICTED: WAT1-related protein At5g40240-like [Solanum pennellii]	RecName: Full=WAT1-related protein At3g28050;	RecName: Full=WAT1-related protein {ECO:0000256|RuleBase:RU363077};	--	GO:0016021,integral component of membrane; GO:0005886,plasma membrane; GO:0022857,transmembrane transporter activity	EamA-like transporter family
SMEL_002g164180.1	1.32	1.44	0.88	0.36	0.46	0.41	55	67	36	14	20	16	0.376	-1.412	0.000240454	0.00263617	down	SMEL3Ch02	78821333	78827600	+	SMEL_002g164180.1.01	--	K10529 alpha-dioxygenase [EC:1.-.-.-] | (RefSeq) alpha-dioxygenase 1-like (A)	PREDICTED: alpha-dioxygenase 1 [Nicotiana sylvestris]	RecName: Full=Alpha-dioxygenase 1; Short=Alpha DOX1; EC=1.14.99.-; AltName: Full=Fatty acid dioxygenase AlphaDOX1; AltName: Full=Pathogen-induced oxygenase; AltName: Full=Plant alpha dioxygenase 1; Flags: Precursor;	SubName: Full=alpha-dioxygenase 1 {ECO:0000313|RefSeq:XP_009795536.1};	Peroxidase/oxygenase	GO:0012511,monolayer-surrounded lipid storage body; GO:0020037,heme binding; GO:0046872,metal ion binding; GO:0016702,oxidoreductase activity, acting on single donors with incorporation of molecular oxygen, incorporation of two atoms of oxygen; GO:0004601,peroxidase activity; GO:1902609,(R)-2-hydroxy-alpha-linolenic acid biosynthetic process; GO:0008219,cell death; GO:0071732,cellular response to…	Animal haem peroxidase
SMEL_002g164340.1	32.69	27.04	14.48	13.15	9.51	8.14	981	902	426	368	299	226	0.461	-1.117	0.000140783	0.00172086	down	SMEL3Ch02	78933292	78937087	-	SMEL_002g164340.1.01	--	K14638 solute carrier family 15 (peptide/histidine transporter), member 3/4 | (RefSeq) protein NRT1/ PTR FAMILY 5.8-like (A)	PREDICTED: protein NRT1/ PTR FAMILY 5.8 [Solanum lycopersicum]	RecName: Full=Protein NRT1/ PTR FAMILY 5.8; Short=AtNPF5.8;	SubName: Full=Uncharacterized protein {ECO:0000313|EnsemblPlants:Solyc02g087280.2.1};	H+/oligopeptide symporter	GO:0016021,integral component of membrane; GO:0022857,transmembrane transporter activity; GO:0009624,response to nematode	POT family
SMEL_002g164580.1	0.03	0.07	0.11	0.35	0.36	0.47	1	3	4	12	14	16	6.148	2.62	0.000870166	0.00731742	up	SMEL3Ch02	79105888	79108601	-	SMEL_002g164580.1.01	--	K08900 mitochondrial chaperone BCS1 | (RefSeq) AAA-ATPase At3g28510-like (A)	PREDICTED: AAA-ATPase At3g28510-like [Solanum tuberosum]	RecName: Full=AAA-ATPase At3g28610; EC=3.6.1.3 {ECO:0000250|UniProtKB:Q9FLD5}; Flags: Precursor;	SubName: Full=Uncharacterized protein {ECO:0000313|EnsemblPlants:PGSC0003DMT400003558};	AAA+-type ATPase	GO:0005524,ATP binding; GO:0016887,ATPase activity; GO:0009651,response to salt stress	ATPase family associated with various cellular activities (AAA)
SMEL_002g164760.1	37.45	33.3	33.99	31.7	97.66	106.45	850	840	756	671	2322	2234	2.509	1.327	0.000862563	0.00725941	up	SMEL3Ch02	79251683	79255026	+	SMEL_002g164760.1.01	--	K10712 cysteamine dioxygenase [EC:1.13.11.19] | (RefSeq) plant cysteine oxidase 2 (A)	PREDICTED: plant cysteine oxidase 2 [Solanum tuberosum]	RecName: Full=Plant cysteine oxidase 2 {ECO:0000303|PubMed:24599061}; EC=1.13.11.20;	SubName: Full=Uncharacterized protein {ECO:0000313|EnsemblPlants:PGSC0003DMT400003317};	Uncharacterized conserved protein	GO:0005829,cytosol; GO:0005634,nucleus; GO:0017172,cysteine dioxygenase activity; GO:0046872,metal ion binding; GO:0070483,detection of hypoxia; GO:0018171,peptidyl-cysteine oxidation; GO:0001666,response to hypoxia	PCO_ADO
SMEL_002g165260.1	65.66	66.86	76.41	112.29	124.65	151.48	1344	1521	1533	2144	2673	2867	2.046	1.033	1.83539e-07	5.95042e-06	up	SMEL3Ch02	79901090	79907248	-	SMEL_002g165260.1.01	--	K01850 chorismate mutase [EC:5.4.99.5] | (RefSeq) chorismate mutase 1, chloroplastic (A)	PREDICTED: chorismate mutase 1, chloroplastic [Solanum tuberosum]	RecName: Full=Chorismate mutase 1, chloroplastic; Short=AtCM1; EC=5.4.99.5; AltName: Full=CM-1; Flags: Precursor;	RecName: Full=Chorismate mutase {ECO:0000256|PIRNR:PIRNR017318}; EC=5.4.99.5 {ECO:0000256|PIRNR:PIRNR017318};	Chorismate mutase	GO:0009507,chloroplast; GO:0005829,cytosol; GO:0004106,chorismate mutase activity; GO:0016688,L-ascorbate peroxidase activity; GO:0009073,aromatic amino acid family biosynthetic process; GO:0046417,chorismate metabolic process	--
SMEL_002g165310.1	46.34	46.02	11.66	13.78	7.77	8.03	1042	1150	257	289	183	167	0.318	-1.651	0.00018555	0.0021456	down	SMEL3Ch02	79934323	79935705	-	SMEL_002g165310.1.01	--	K23154 2-hydroxyflavanone C-glucosyltransferase [EC:2.4.1.360] | (RefSeq) UDP-glycosyltransferase 708A6-like (A)	PREDICTED: UDP-glycosyltransferase 708A6-like [Solanum tuberosum]	RecName: Full=UDP-glycosyltransferase 708C1 {ECO:0000303|PubMed:25142187}; EC=2.4.1.- {ECO:0000305}; AltName: Full=C-glucosyltransferase a {ECO:0000303|PubMed:25142187}; Short=FeCGTa {ECO:0000303|PubMed:25142187}; AltName: Full=UDP-glucose:2-hydroxyflavanone C-glucosyltransferase {ECO:0000305};	SubName: Full=Uncharacterized protein {ECO:0000313|EnsemblPlants:PGSC0003DMT400089418};	UDP-glucuronosyl and UDP-glucosyl transferase	GO:0016758,transferase activity, transferring hexosyl groups; GO:0008152,metabolic process	UDP-glucoronosyl and UDP-glucosyl transferase
SMEL_002g165370.1	7.06	4.31	3.03	7.89	19.67	6.43	304	206	128	317	887	256	2.635	1.398	0.00157356	0.0117942	up	SMEL3Ch02	79968109	79972500	-	SMEL_002g165370.1.01	--	K05391 cyclic nucleotide gated channel, plant | (RefSeq) cyclic nucleotide-gated ion channel 2 (A)	PREDICTED: cyclic nucleotide-gated ion channel 2 isoform X1 [Solanum lycopersicum]	RecName: Full=Cyclic nucleotide-gated ion channel 2; Short=AtCNGC2; AltName: Full=Cyclic nucleotide- and calmodulin-regulated ion channel 2; AltName: Full=Protein DEFENSE NO DEATH 1;	SubName: Full=Uncharacterized protein {ECO:0000313|EnsemblPlants:Solyc02g088560.2.1};	K+-channel ERG and related proteins, contain PAS/PAC sensor domain	GO:0005887,integral component of plasma membrane; GO:0005622,intracellular; GO:0005262,calcium channel activity; GO:0005516,calmodulin binding; GO:0030552,cAMP binding; GO:0030553,cGMP binding; GO:0005222,intracellular cAMP-activated cation channel activity; GO:0005221,intracellular cyclic nucleotide activated cation channel activity; GO:0005242,inward rectifier potassium channel activity; GO:007…	Ion transport protein
SMEL_002g165450.1	49.85	44.2	104.45	165.27	157.65	147.8	2185	2153	4487	6757	7239	5990	2.553	1.352	8.72149e-05	0.00116273	up	SMEL3Ch02	80024014	80029203	-	SMEL_002g165450.1.01	--	K20867 galacturonosyltransferase 12/13/14/15 [EC:2.4.1.-] | (RefSeq) probable galacturonosyltransferase 14 (A)	PREDICTED: probable galacturonosyltransferase 14 [Solanum tuberosum]	RecName: Full=Probable galacturonosyltransferase 13; EC=2.4.1.-;	RecName: Full=Hexosyltransferase {ECO:0000256|RuleBase:RU362027}; EC=2.4.1.- {ECO:0000256|RuleBase:RU362027};	--	GO:0005794,Golgi apparatus; GO:0000139,Golgi membrane; GO:0016021,integral component of membrane; GO:0090406,pollen tube; GO:0047262,polygalacturonate 4-alpha-galacturonosyltransferase activity; GO:0052325,cell wall pectin biosynthetic process; GO:0009555,pollen development; GO:0009860,pollen tube growth	Glycosyl transferase family 8
SMEL_002g165560.1	11.8	13.75	16.18	16.8	27.51	31.38	61	79	82	81	149	150	2.001	1.001	0.00255702	0.0171726	up	SMEL3Ch02	80155798	80156115	+	SMEL_002g165560.1.01	--	K06672 cohesin loading factor subunit SCC2 | (RefSeq) nipped-B-like protein B (A)	PREDICTED: uncharacterized protein LOC107009720 [Solanum pennellii]	RecName: Full=Transcription factor UPBEAT1; AltName: Full=Basic helix-loop-helix protein 151; Short=AtbHLH151; Short=bHLH 151; AltName: Full=Transcription factor EN 146; AltName: Full=Transcription factor bHLH151; AltName: Full=bHLH transcription factor bHLH151;	SubName: Full=Uncharacterized protein {ECO:0000313|EnsemblPlants:Solyc02g088740.1.1};	--	GO:0005634,nucleus; GO:0003677,DNA binding; GO:0003700,DNA-binding transcription factor activity; GO:0046983,protein dimerization activity; GO:0030154,cell differentiation; GO:2000280,regulation of root development; GO:0006355,regulation of transcription, DNA-templated; GO:0006351,transcription, DNA-templated	--
SMEL_002g165630.1	11.75	9.21	11.86	3.93	2.05	2.73	93	81	92	29	17	20	0.289	-1.788	3.75018e-07	1.10897e-05	down	SMEL3Ch02	80215328	80216339	+	SMEL_002g165630.1.01	--	--	PREDICTED: uncharacterized protein LOC102585644 [Solanum tuberosum]	--	SubName: Full=Uncharacterized protein {ECO:0000313|EnsemblPlants:PGSC0003DMT400003443};	--	--	Spo12 family
SMEL_002g165810.1	1.73	1.92	1.45	0.88	0.35	0.4	84	104	69	40	18	18	0.35	-1.513	9.23395e-05	0.00121611	down	SMEL3Ch02	80391312	80395021	+	SMEL_002g165810.1.01	--	K04733 interleukin-1 receptor-associated kinase 4 [EC:2.7.11.1] | (RefSeq) receptor-like protein kinase FERONIA (A)	PREDICTED: receptor-like protein kinase FERONIA isoform X2 [Solanum tuberosum]	RecName: Full=Receptor-like protein kinase FERONIA; EC=2.7.11.1; AltName: Full=Protein SIRENE; Flags: Precursor;	SubName: Full=Uncharacterized protein {ECO:0000313|EnsemblPlants:PGSC0003DMT400003464};	Serine/threonine protein kinase	GO:0043680,filiform apparatus; GO:0016021,integral component of membrane; GO:0005622,intracellular; GO:0016020,membrane; GO:0005886,plasma membrane; GO:0009506,plasmodesma; GO:0005524,ATP binding; GO:0004672,protein kinase activity; GO:0004674,protein serine/threonine kinase activity; GO:0009738,abscisic acid-activated signaling pathway; GO:0009742,brassinosteroid mediated signaling pathway; GO:0…	Carbohydrate-binding protein of the ER
SMEL_002g165910.1	14.12	7.68	4.31	34.47	75.16	51.16	177	107	53	403	987	593	6.93	2.793	1.44424e-11	1.23515e-09	up	SMEL3Ch02	80482235	80483197	+	SMEL_002g165910.1.01	--	K09422 transcription factor MYB, plant | (RefSeq) myb-related protein 340 (A)	Transcription factor MYB59 [Capsicum chinense]	RecName: Full=Transcription factor MYB48; AltName: Full=Myb-related protein 48; Short=AtMYB48;	SubName: Full=Transcription factor MYB59 {ECO:0000313|EMBL:PHU27472.1};	Transcription factor, Myb superfamily	GO:0005634,nucleus; GO:0003700,DNA-binding transcription factor activity; GO:0000981,DNA-binding transcription factor activity, RNA polymerase II-specific; GO:0043565,sequence-specific DNA binding; GO:0001135,RNA polymerase II transcription regulator recruiting activity; GO:0044212,transcription regulatory region DNA binding; GO:0030154,cell differentiation; GO:0006357,regulation of transcription…	Myb-like DNA-binding domain
SMEL_002g165950.1	27.55	33.74	27.95	46.57	80.74	114.68	529	720	526	834	1624	2036	3.019	1.594	8.0018e-07	2.16437e-05	up	SMEL3Ch02	80521756	80525129	+	SMEL_002g165950.1.01	--	K11649 SWI/SNF related-matrix-associated actin-dependent regulator of chromatin subfamily C | (RefSeq) CHB3501; predicted protein (A)	PREDICTED: uncharacterized protein YwbO [Solanum pennellii]	--	SubName: Full=uncharacterized protein YwbO-like {ECO:0000313|RefSeq:XP_016466970.1};	--	GO:0015035,protein disulfide oxidoreductase activity	DSBA-like thioredoxin domain
SMEL_002g166060.1	7.48	14.98	9.26	1.72	0.85	1.44	84	187	102	18	10	15	0.138	-2.852	1.01384e-11	8.93924e-10	down	SMEL3Ch02	80631616	80632601	+	SMEL_002g166060.1.01	--	K03860 phosphatidylinositol glycan, class Q | (RefSeq) N-acetylglucosaminyl-phosphatidylinositol biosynthetic protein gpi1-like (A)	PREDICTED: protein GAST1 [Capsicum annuum]	RecName: Full=Protein GAST1; Flags: Precursor;	SubName: Full=Protein GAST1 {ECO:0000313|EMBL:PHT57012.1};	--	GO:0005576,extracellular region	Gibberellin regulated protein
SMEL_002g166770.1	18.97	20.98	15.08	57.02	49.15	50.54	358	440	279	1004	972	882	3.146	1.653	2.13836e-28	2.09875e-25	up	SMEL3Ch02	81305183	81307475	+	SMEL_002g166770.1.01	--	K00679 phospholipid:diacylglycerol acyltransferase [EC:2.3.1.158] | (RefSeq) hypothetical protein (A)	GDSL esterase/lipase [Capsicum chinense]	RecName: Full=GDSL esterase/lipase At2g23540; EC=3.1.1.-; AltName: Full=Extracellular lipase At2g23540; Flags: Precursor;	SubName: Full=GDSL esterase/lipase {ECO:0000313|EMBL:PHU27394.1};	--	GO:0005576,extracellular region; GO:0016788,hydrolase activity, acting on ester bonds; GO:0016042,lipid catabolic process	GDSL-like Lipase/Acylhydrolase
SMEL_002g166830.1	11.63	11.58	9.84	4.95	3.15	4.44	317	351	263	126	90	112	0.418	-1.26	4.45865e-09	2.26907e-07	down	SMEL3Ch02	81343072	81345169	+	SMEL_002g166830.1.01	--	K20556 cytochrome P450 family 76 subfamily C | (RefSeq) geraniol 8-hydroxylase-like (A)	PREDICTED: geraniol 8-hydroxylase-like [Solanum tuberosum]	RecName: Full=Geraniol 8-hydroxylase; EC=1.14.13.152; AltName: Full=Cytochrome P450 76B10; AltName: Full=Geraniol 10-hydroxylase; Short=SmG10H;	SubName: Full=Putative geraniol 8-hydroxylase-like {ECO:0000313|EMBL:JAP31069.1};	Cytochrome P450 CYP2 subfamily	GO:0005789,endoplasmic reticulum membrane; GO:0016021,integral component of membrane; GO:0102811,geraniol 10-hydroxylase activity; GO:0020037,heme binding; GO:0005506,iron ion binding; GO:0016709,oxidoreductase activity, acting on paired donors, with incorporation or reduction of molecular oxygen, NAD(P)H as one donor, and incorporation of one atom of oxygen; GO:0016099,monoterpenoid biosynthetic…	Cytochrome P450
SMEL_002g167010.1	13.3	16.9	43.63	49.13	46.21	57.28	330	466	1061	1137	1201	1314	2.217	1.149	0.0075685	0.0395624	up	SMEL3Ch02	81534328	81536428	-	SMEL_002g167010.1.01	--	--	patatin-like protein 3 precursor [Capsicum annuum]	RecName: Full=Patatin-like protein 3; Short=AtPLP3; EC=3.1.1.-; AltName: Full=Patatin-related phospholipase A IIbeta; Short=pPLAIIb; AltName: Full=Phospholipase A IVC; Short=AtPLAIVC;	SubName: Full=patatin-like protein 3 {ECO:0000313|RefSeq:XP_016561123.1};	Ca2+-independent phospholipase A2	GO:0005737,cytoplasm; GO:0016020,membrane; GO:0047372,acylglycerol lipase activity; GO:0004620,phospholipase activity; GO:0006952,defense response; GO:0016042,lipid catabolic process; GO:0009737,response to abscisic acid	Patatin-like phospholipase
SMEL_002g167040.1	1.45	2.43	1.34	0.45	0.59	0.15	21	39	19	6	9	2	0.254	-1.979	0.00170163	0.0125548	down	SMEL3Ch02	81565862	81568879	-	SMEL_002g167040.1.01	--	K04708 3-dehydrosphinganine reductase [EC:1.1.1.102] | (RefSeq) 3-dehydrosphinganine reductase TSC10A-like (A)	PREDICTED: 3-ketodihydrosphingosine reductase isoform X1 [Solanum pennellii]	--	SubName: Full=Uncharacterized protein {ECO:0000313|EnsemblPlants:Solyc02g090540.2.1};	17 beta-hydroxysteroid dehydrogenase type 3, HSD17B3	--	short chain dehydrogenase
SMEL_002g167090.1	0.98	1.98	1.99	0	0.23	0	4	9	8	0	1	0	0.06	-4.059	0.00801665	0.0413181	down	SMEL3Ch02	81640424	81640675	-	SMEL_002g167090.1.01	--	--	hypothetical protein BC332_03669 [Capsicum chinense]	--	SubName: Full=Uncharacterized protein {ECO:0000313|EnsemblPlants:Solyc02g090590.1.1};	--	GO:0048364,root development	--
SMEL_002g167390.1	17.4	17.83	12.01	6.4	5.6	4.91	510	581	345	175	172	133	0.396	-1.336	1.01485e-11	8.93924e-10	down	SMEL3Ch02	81920070	81923924	+	SMEL_002g167390.1.01	--	K22455 estrogen receptor-binding fragment-associated gene 9 protein | (RefSeq) uncharacterized protein At3g61260 (A)	PREDICTED: uncharacterized protein LOC102591955 isoform X2 [Solanum tuberosum]	RecName: Full=Remorin 4.1 {ECO:0000305}; Short=OsREM4.1 {ECO:0000303|PubMed:17984200}; AltName: Full=Remorin group 4 member 1 {ECO:0000303|PubMed:17984200};	SubName: Full=Uncharacterized protein {ECO:0000313|EnsemblPlants:PGSC0003DMT400010346};	--	GO:0005886,plasma membrane; GO:0009738,abscisic acid-activated signaling pathway; GO:1900458,negative regulation of brassinosteroid mediated signaling pathway	Remorin, C-terminal region
SMEL_002g167440.1	34.93	36.48	57.91	12.73	13.12	15.6	971	1127	1578	330	382	401	0.349	-1.518	3.39535e-08	1.37488e-06	down	SMEL3Ch02	81999302	82001331	+	SMEL_002g167440.1.01	--	K07374 tubulin alpha | (RefSeq) tubulin alpha chain-like (A)	PREDICTED: tubulin alpha chain-like [Capsicum annuum]	RecName: Full=Tubulin alpha chain;	RecName: Full=Tubulin alpha chain {ECO:0000256|RuleBase:RU000352};	Alpha tubulin	GO:0005737,cytoplasm; GO:0005874,microtubule; GO:0005525,GTP binding; GO:0003924,GTPase activity; GO:0005200,structural constituent of cytoskeleton; GO:0007017,microtubule-based process	Tubulin/FtsZ family, GTPase domain
SMEL_002g167450.1	4.32	1.77	0.4	6.95	24.1	6.27	44	20	4	66	257	59	6.52	2.705	0.000179834	0.00209435	up	SMEL3Ch02	82001362	82002599	-	SMEL_002g167450.1.01	--	--	hypothetical protein CQW23_05551 [Capsicum baccatum]	--	SubName: Full=Putative ovule protein {ECO:0000313|EMBL:JAP07951.1};	--	--	--
SMEL_002g167470.1	15.45	13.04	10.92	6.68	4.14	5.42	114	107	79	46	32	37	0.454	-1.141	9.09418e-05	0.00119847	down	SMEL3Ch02	82018294	82019075	+	SMEL_002g167470.1.01	--	--	PREDICTED: non-specific lipid-transfer protein A-like [Solanum tuberosum]	RecName: Full=Non-specific lipid-transfer protein AP10; Short=Ha-AP10; Short=LTP; Short=NsLTP; Flags: Precursor;	RecName: Full=Non-specific lipid-transfer protein {ECO:0000256|RuleBase:RU000628};	--	GO:0005615,extracellular space; GO:0016020,membrane; GO:0008289,lipid binding; GO:0050832,defense response to fungus; GO:0031640,killing of cells of other organism; GO:0006869,lipid transport	Protease inhibitor/seed storage/LTP family
SMEL_002g167660.1	16.09	10.89	15.12	7.24	5.06	5.03	367	276	338	154	121	106	0.45	-1.152	5.35198e-06	0.000112907	down	SMEL3Ch02	82148335	82150147	-	SMEL_002g167660.1.01	--	K01728 pectate lyase [EC:4.2.2.2] | (RefSeq) probable pectate lyase P18 (A)	PREDICTED: probable pectate lyase P18 [Nicotiana attenuata]	RecName: Full=Probable pectate lyase P18; EC=4.2.2.2; AltName: Full=Style development-specific protein 9612; Flags: Precursor;	RecName: Full=Pectate lyase {ECO:0000256|RuleBase:RU361123}; EC=4.2.2.2 {ECO:0000256|RuleBase:RU361123};	--	GO:0005576,extracellular region; GO:0046872,metal ion binding; GO:0030570,pectate lyase activity; GO:0045490,pectin catabolic process	Pectate lyase
SMEL_002g167730.1	69.71	57.95	49.06	122.71	145.27	135.32	1589	1468	1096	2609	3469	2852	2.53	1.339	2.10661e-16	4.17493e-14	up	SMEL3Ch02	82188284	82191393	-	SMEL_002g167730.1.01	--	K10251 17beta-estradiol 17-dehydrogenase / very-long-chain 3-oxoacyl-CoA reductase [EC:1.1.1.62 1.1.1.330] | (RefSeq) very-long-chain 3-oxoacyl-CoA reductase 1 (A)	PREDICTED: very-long-chain 3-oxoacyl-CoA reductase 1 [Solanum tuberosum]	RecName: Full=Very-long-chain 3-oxoacyl-CoA reductase 1; EC=1.1.1.330; AltName: Full=Beta-ketoacyl reductase 1; Short=AtKCR1; AltName: Full=Protein GLOSSY 8; Short=gl8At;	SubName: Full=Uncharacterized protein {ECO:0000313|EnsemblPlants:PGSC0003DMT400032914};	--	GO:0005783,endoplasmic reticulum; GO:0005789,endoplasmic reticulum membrane; GO:0016021,integral component of membrane; GO:0016020,membrane; GO:0102339,3-oxo-arachidoyl-CoA reductase activity; GO:0102340,3-oxo-behenoyl-CoA reductase activity; GO:0102342,3-oxo-cerotoyl-CoA reductase activity; GO:0102341,3-oxo-lignoceroyl-CoA reductase activity; GO:0018454,acetoacetyl-CoA reductase activity; GO:004…	short chain dehydrogenase
SMEL_002g167840.1	10.16	11.53	9.92	4.63	4.83	4.38	233	294	223	99	116	93	0.483	-1.05	1.12988e-08	5.1295e-07	down	SMEL3Ch02	82230811	82232446	-	SMEL_002g167840.1.01	--	K09422 transcription factor MYB, plant | (RefSeq) myb-related protein 315-like (A)	PREDICTED: myb-related protein 315-like [Solanum tuberosum]	RecName: Full=Protein ODORANT1; AltName: Full=MYB-like protein ODO1;	SubName: Full=Uncharacterized protein {ECO:0000313|EnsemblPlants:PGSC0003DMT400032930};	Transcription factor, Myb superfamily	GO:0005634,nucleus; GO:0003677,DNA binding; GO:0006355,regulation of transcription, DNA-templated; GO:0006351,transcription, DNA-templated	Myb-like DNA-binding domain
SMEL_002g167980.1	13.2	13.22	26.78	35.48	38.89	49.05	890	990	1769	2231	2746	3057	2.517	1.331	7.87611e-05	0.0010701	up	SMEL3Ch02	82328863	82345226	+	SMEL_002g167980.1.01	--	K15015 solute carrier family 32 (vesicular inhibitory amino acid transporter) | (RefSeq) lysine histidine transporter-like 2 (A)	hypothetical protein CUMW_229900 [Citrus unshiu]	RecName: Full=Lysine histidine transporter 1;	SubName: Full=Uncharacterized protein {ECO:0000313|EnsemblPlants:Solyc02g093870.2.1};	Amino acid transporters	GO:0016021,integral component of membrane; GO:0005886,plasma membrane; GO:0015171,amino acid transmembrane transporter activity; GO:0015293,symporter activity; GO:0043090,amino acid import; GO:0080167,response to karrikin	Transmembrane amino acid transporter protein
SMEL_002g168070.1	9.73	7.79	7.3	18.66	26.92	33.91	299	266	220	535	867	964	3.564	1.834	4.98039e-12	4.81929e-10	up	SMEL3Ch02	82429493	82432694	-	SMEL_002g168070.1.01	--	--	PREDICTED: uncharacterized protein LOC107860749 isoform X1 [Capsicum annuum]	--	SubName: Full=uncharacterized protein LOC107860749 isoform X1 {ECO:0000313|RefSeq:XP_016561707.1};	--	--	BRO1-like domain
SMEL_002g168140.1	1.41	1.69	1.17	3.36	6.92	4.63	27	36	22	60	139	82	3.876	1.954	2.37809e-07	7.41526e-06	up	SMEL3Ch02	82475374	82478842	+	SMEL_002g168140.1.01	--	K01052 lysosomal acid lipase/cholesteryl ester hydrolase [EC:3.1.1.13] | (RefSeq) triacylglycerol lipase 2-like (A)	PREDICTED: triacylglycerol lipase 2-like [Solanum tuberosum]	RecName: Full=Triacylglycerol lipase 2; EC=3.1.1.3; Flags: Precursor;	RecName: Full=Lipase {ECO:0000256|PIRNR:PIRNR000862};	Triglyceride lipase-cholesterol esterase	GO:0005576,extracellular region; GO:0016298,lipase activity; GO:0004806,triglyceride lipase activity; GO:0002213,defense response to insect; GO:0016042,lipid catabolic process	Partial alpha/beta-hydrolase lipase region
SMEL_002g168440.1	24.24	29.12	19.78	10.96	9.69	8.08	370	494	296	156	155	114	0.434	-1.205	1.88163e-09	1.05101e-07	down	SMEL3Ch02	82664789	82665994	-	SMEL_002g168440.1.01	--	--	PREDICTED: pollen allergen Che a 1 [Solanum lycopersicum]	RecName: Full=Pollen-specific protein-like At4g18596; Flags: Precursor;	SubName: Full=Putative pollen allergen Che a 1-like {ECO:0000313|EMBL:JAP23505.1};	--	GO:0005615,extracellular space	Pollen proteins Ole e I like
SMEL_002g168450.1	6.09	5.74	2.34	1.45	1.1	0.89	207	217	78	46	39	28	0.27	-1.888	9.91805e-07	2.61408e-05	down	SMEL3Ch02	82676122	82678665	+	SMEL_002g168450.1.01	--	K14494 DELLA protein | (Kazusa) Lj6g3v0433880.1; - (A)	PREDICTED: DELLA protein GAI-like [Solanum tuberosum]	RecName: Full=DELLA protein GAI1; AltName: Full=Gibberellic acid-insensitive mutant protein 1; AltName: Full=VvGAI1;	SubName: Full=DELLA protein RGL2-like {ECO:0000313|RefSeq:XP_016561751.1};	--	GO:0005634,nucleus; GO:0000989,NA; GO:0009740,gibberellic acid mediated signaling pathway; GO:0006355,regulation of transcription, DNA-templated; GO:0006351,transcription, DNA-templated	GRAS domain family
SMEL_003g169130.1	8.63	14.56	52.85	89.08	83.95	84.03	16	30	96	154	163	144	3.594	1.846	0.00154025	0.0116116	up	SMEL3Ch03	107026	107139	+	SMEL_003g169130.1.01	--	--	hypothetical protein BC332_30066 [Capsicum chinense]	--	SubName: Full=Uncharacterized protein {ECO:0000313|EnsemblPlants:PGSC0003DMT400035024};	--	GO:0016021,integral component of membrane	--
SMEL_003g169190.1	25.58	34.86	25.13	11.95	7.12	7.85	645	977	621	281	188	183	0.345	-1.533	9.80133e-11	7.11321e-09	down	SMEL3Ch03	182418	189694	+	SMEL_003g169190.1.01	--	K17500 integrin-linked kinase-associated serine/threonine phosphatase 2C [EC:3.1.3.16] | (RefSeq) WAT1-related protein At3g18200 isoform X1 (A)	PREDICTED: WAT1-related protein At1g44800-like [Solanum tuberosum]	RecName: Full=WAT1-related protein At4g08300;	RecName: Full=WAT1-related protein {ECO:0000256|RuleBase:RU363077};	--	GO:0016021,integral component of membrane; GO:0005886,plasma membrane; GO:0015171,amino acid transmembrane transporter activity; GO:0032973,amino acid export across plasma membrane; GO:0080144,amino acid homeostasis; GO:0043090,amino acid import	EamA-like transporter family
SMEL_003g169410.1	224.13	297.96	204.03	95.75	72.12	103.27	798	1179	712	318	269	340	0.413	-1.276	2.26734e-09	1.24619e-07	down	SMEL3Ch03	351750	351968	+	SMEL_003g169410.1.01	--	--	--	--	--	--	--	--
SMEL_003g169510.1	17.39	14.51	11.18	36.9	30.61	27.04	192	178	121	380	354	276	2.424	1.277	4.92279e-10	3.16737e-08	up	SMEL3Ch03	394480	395740	-	SMEL_003g169510.1.01	--	--	PREDICTED: non-specific lipid-transfer protein-like protein At2g13820 [Solanum tuberosum]	RecName: Full=Non-specific lipid-transfer protein-like protein At2g13820; Flags: Precursor;	SubName: Full=Uncharacterized protein {ECO:0000313|EnsemblPlants:PGSC0003DMT400034954};	--	GO:0046658,anchored component of plasma membrane; GO:0005576,extracellular region; GO:0005886,plasma membrane; GO:0008289,lipid binding; GO:0006869,lipid transport	Probable lipid transfer
SMEL_003g169530.1	40.59	35.12	31.97	141.89	158.92	75.86	522	502	403	1702	2141	902	3.846	1.943	4.86991e-13	5.70305e-11	up	SMEL3Ch03	399970	401855	+	SMEL_003g169530.1.01	--	--	PREDICTED: classical arabinogalactan protein 4-like [Capsicum annuum]	RecName: Full=Non-specific lipid-transfer protein-like protein At5g64080; Flags: Precursor;	SubName: Full=classical arabinogalactan protein 4-like {ECO:0000313|RefSeq:XP_016571794.1};	--	GO:0031225,anchored component of membrane; GO:0046658,anchored component of plasma membrane; GO:0008289,lipid binding; GO:0006869,lipid transport	Probable lipid transfer
SMEL_003g169560.1	27.43	28.86	23.46	13.51	10.54	11.59	668	781	560	307	269	261	0.493	-1.021	2.31135e-11	1.89045e-09	down	SMEL3Ch03	483043	486915	+	SMEL_003g169560.1.01	--	K12502 MPBQ/MSBQ methyltransferase [EC:2.1.1.295] | (RefSeq) 2-methyl-6-phytyl-1,4-hydroquinone methyltransferase, chloroplastic-like (A)	PREDICTED: 2-methyl-6-phytyl-1,4-hydroquinone methyltransferase, chloroplastic-like [Solanum tuberosum]	RecName: Full=2-methyl-6-phytyl-1,4-hydroquinone methyltransferase, chloroplastic; EC=2.1.1.295; AltName: Full=37 kDa inner envelope membrane protein; Short=E37; AltName: Full=MPBQ/MSBQ methyltransferase; Flags: Precursor;	SubName: Full=Putative 2-methyl-6-phytyl-1,4-hydroquinone methyltransferase, chloroplastic-like {ECO:0000313|EMBL:JAP27956.1};	Ubiquinone biosynthesis methyltransferase COQ5	GO:0009706,chloroplast inner membrane; GO:0016021,integral component of membrane; GO:0102550,2-methyl-6-geranylgeranyl-1,4-benzoquinol methyltransferase activity; GO:0010189,vitamin E biosynthetic process	Methyltransferase domain
SMEL_003g169650.1	7.68	7.85	6.9	17.66	14.76	17.48	243	276	214	521	489	511	2.451	1.294	9.85e-17	2.18299e-14	up	SMEL3Ch03	541589	544741	-	SMEL_003g169650.1.01	--	K15397 3-ketoacyl-CoA synthase [EC:2.3.1.199] | (RefSeq) 3-ketoacyl-CoA synthase 11 (A)	PREDICTED: 3-ketoacyl-CoA synthase 11 [Solanum lycopersicum]	RecName: Full=3-ketoacyl-CoA synthase 11 {ECO:0000303|PubMed:18465198}; Short=KCS-11 {ECO:0000303|PubMed:18465198}; EC=2.3.1.199 {ECO:0000269|PubMed:16765910}; AltName: Full=Very long-chain fatty acid condensing enzyme 11 {ECO:0000303|PubMed:18465198}; Short=VLCFA condensing enzyme 11 {ECO:0000303|PubMed:18465198};	RecName: Full=3-ketoacyl-CoA synthase {ECO:0000256|PIRNR:PIRNR036417}; EC=2.3.1.- {ECO:0000256|PIRNR:PIRNR036417};	--	GO:0016021,integral component of membrane; GO:0102336,3-oxo-arachidoyl-CoA synthase activity; GO:0102337,3-oxo-cerotoyl-CoA synthase activity; GO:0102338,3-oxo-lignoceronyl-CoA synthase activity; GO:0102756,very-long-chain 3-ketoacyl-CoA synthase activity; GO:0006633,fatty acid biosynthetic process; GO:0009409,response to cold; GO:0009416,response to light stimulus	FAE1/Type III polyketide synthase-like protein
SMEL_003g169700.1	1.01	1.65	1.15	0.22	0.35	0.38	49	89	55	10	18	17	0.277	-1.853	6.67829e-06	0.000137098	down	SMEL3Ch03	845827	850618	+	SMEL_003g169700.1.01	--	K10398 kinesin family member 11 | (RefSeq) kinesin-like protein KIF11 (A)	hypothetical protein T459_11107 [Capsicum annuum]	RecName: Full=Kinesin-like protein KIN-10A {ECO:0000305}; AltName: Full=Phragmoplast-associated kinesin-related protein 2 {ECO:0000303|PubMed:11701879}; Short=AtPAKRP2 {ECO:0000303|PubMed:11701879};	SubName: Full=Uncharacterized protein {ECO:0000313|EMBL:PHT82664.1};	Kinesin-like protein	GO:0005737,cytoplasm; GO:0005871,kinesin complex; GO:0005874,microtubule; GO:0009524,phragmoplast; GO:0005524,ATP binding; GO:0008574,ATP-dependent microtubule motor activity, plus-end-directed; GO:0008017,microtubule binding; GO:0007018,microtubule-based movement; GO:0047496,vesicle transport along microtubule	Kinesin motor domain
SMEL_003g169910.1	1.49	0.46	0.22	0.08	0	0	41	14	6	2	0	0	0.039	-4.68	0.000599857	0.00544212	down	SMEL3Ch03	1101189	1105416	-	SMEL_003g169910.1.01	--	K14638 solute carrier family 15 (peptide/histidine transporter), member 3/4 | (RefSeq) protein NRT1/ PTR FAMILY 4.5-like (A)	PREDICTED: protein NRT1/ PTR FAMILY 4.5-like [Solanum tuberosum]	RecName: Full=Protein NRT1/ PTR FAMILY 4.3; Short=AtNPF4.3; AltName: Full=Nitrate transporter 1.14;	SubName: Full=Uncharacterized protein {ECO:0000313|EnsemblPlants:Solyc03g005950.1.1};	H+/oligopeptide symporter	GO:0016021,integral component of membrane; GO:0005886,plasma membrane; GO:0022857,transmembrane transporter activity; GO:0006857,oligopeptide transport; GO:0009624,response to nematode	POT family
SMEL_003g170220.1	119.13	317.13	23.06	26.47	25.57	10.03	796	2355	151	165	179	62	0.152	-2.716	0.00511838	0.0295587	down	SMEL3Ch03	1463195	1463605	+	SMEL_003g170220.1.01	--	--	PREDICTED: uncharacterized protein LOC107015489 [Solanum pennellii]	RecName: Full=Uncharacterized protein At5g01610;	SubName: Full=Putative ovule protein {ECO:0000313|EMBL:JAP22021.1};	--	--	Protein of unknown function, DUF538
SMEL_003g170270.1	7.84	8.96	6.05	3.63	3.12	3.06	197	250	149	85	82	71	0.474	-1.078	8.9523e-07	2.3901e-05	down	SMEL3Ch03	1484044	1489037	+	SMEL_003g170270.1.01	--	K16573 gamma-tubulin complex component 6 | (RefSeq) uncharacterized LOC103722329 (A)	PREDICTED: protein trichome birefringence-like 37 isoform X1 [Capsicum annuum]	RecName: Full=Protein trichome birefringence-like 38;	SubName: Full=protein trichome birefringence-like 37 isoform X1 {ECO:0000313|RefSeq:XP_016570533.1};	--	GO:0005794,Golgi apparatus; GO:0016021,integral component of membrane; GO:0016413,O-acetyltransferase activity; GO:0071554,cell wall organization or biogenesis	GDSL/SGNH-like Acyl-Esterase family found in Pmr5 and Cas1p
SMEL_003g170280.1	1.13	1.87	0.41	0.08	0.07	0.08	31	57	11	2	2	2	0.074	-3.75	1.22219e-05	0.000229384	down	SMEL3Ch03	1491787	1493472	+	SMEL_003g170280.1.01	--	--	PREDICTED: uncharacterized protein LOC102593246 [Solanum tuberosum]	--	SubName: Full=Uncharacterized protein {ECO:0000313|EnsemblPlants:PGSC0003DMT400011199};	--	GO:0016021,integral component of membrane	--
SMEL_003g170620.1	8.45	8.9	16.28	27.84	27.37	29.34	747	875	1411	2297	2536	2399	2.725	1.446	1.31645e-06	3.3498e-05	up	SMEL3Ch03	2034487	2048637	-	SMEL_003g170620.1.01	--	K15173 transcription termination factor 2 [EC:3.6.4.-] | (RefSeq) helicase-like transcription factor CHR28 (A)	PREDICTED: putative SWI/SNF-related matrix-associated actin-dependent regulator of chromatin subfamily A member 3-like 1 isoform X2 [Solanum tuberosum]	RecName: Full=Helicase-like transcription factor CHR28 {ECO:0000305}; EC=3.6.4.- {ECO:0000305}; AltName: Full=Protein CHROMATIN REMODELING 28 {ECO:0000305}; AltName: Full=Protein SNF2-RING-HELICASE-LIKE 2 {ECO:0000303|PubMed:25425661};	SubName: Full=Uncharacterized protein {ECO:0000313|EnsemblPlants:Solyc03g006570.2.1};	Helicase-like transcription factor HLTF/DNA helicase RAD5, DEAD-box superfamily	GO:0005737,cytoplasm; GO:0005634,nucleus; GO:0005524,ATP binding; GO:0003677,DNA binding; GO:0004386,helicase activity; GO:0046872,metal ion binding; GO:0016569,covalent chromatin modification; GO:0006355,regulation of transcription, DNA-templated; GO:0080188,RNA-directed DNA methylation; GO:0006351,transcription, DNA-templated	SNF2 family N-terminal domain
SMEL_003g170700.1	5.85	9.45	4.81	11.69	23.24	26.62	221	397	178	412	920	930	3.43	1.778	6.72592e-07	1.85331e-05	up	SMEL3Ch03	2119664	2122197	+	SMEL_003g170700.1.01	--	--	hypothetical protein CQW23_09149 [Capsicum baccatum]	RecName: Full=F-box protein SKIP27; AltName: Full=SKP1-interacting partner 27;	SubName: Full=Uncharacterized protein {ECO:0000313|EMBL:PHT49402.1};	--	GO:0005634,nucleus; GO:0016567,protein ubiquitination	--
SMEL_003g171060.1	1.68	1.66	3.26	4.32	4.97	5.45	10	11	19	24	31	30	2.453	1.295	0.00819761	0.0420092	up	SMEL3Ch03	2616937	2617302	-	SMEL_003g171060.1.01	--	--	PREDICTED: uncharacterized protein LOC109240508 [Nicotiana attenuata]	--	SubName: Full=Uncharacterized protein {ECO:0000313|EnsemblPlants:PGSC0003DMT400013032};	--	--	--
SMEL_003g171210.1	6.03	8.05	5.27	3.59	2.85	2.12	83	123	71	46	41	27	0.487	-1.038	0.000814538	0.00691728	down	SMEL3Ch03	2841354	2842199	+	SMEL_003g171210.1.01	--	K22383 interferon regulatory factor 2-binding protein | (RefSeq) homeobox even-skipped homolog protein 2 (A)	PREDICTED: uncharacterized protein LOC102605265 [Solanum tuberosum]	RecName: Full=Probable E3 ubiquitin-protein ligase LUL4; EC=2.3.2.27; AltName: Full=Probable RING-type E3 ubiquitin transferase LUL4 {ECO:0000305}; AltName: Full=Protein LOG2-LIKE UBIQUITIN LIGASE 4; AltName: Full=RING finger protein 208;	SubName: Full=Uncharacterized protein {ECO:0000313|EnsemblPlants:PGSC0003DMT400061842};	--	GO:0046872,metal ion binding; GO:0004842,ubiquitin-protein transferase activity	Zinc finger, C3HC4 type (RING finger)
SMEL_003g171220.1	51.13	50.27	30.12	23.79	16.47	15.37	788	861	455	342	266	219	0.468	-1.095	7.22262e-06	0.000145661	down	SMEL3Ch03	2843787	2845820	+	SMEL_003g171220.1.01	--	K20628 expansin | (RefSeq) expansin-A15 (A)	expansin A3 precursor [Solanum lycopersicum]	RecName: Full=Expansin-A13; Short=AtEXPA13; AltName: Full=Alpha-expansin-13; Short=At-EXP13; Short=AtEx13; AltName: Full=Ath-ExpAlpha-1.22; Flags: Precursor;	SubName: Full=Expansin {ECO:0000313|EMBL:AAD13631.1, ECO:0000313|EnsemblPlants:Solyc03g031840.2.1};	--	GO:0005618,cell wall; GO:0005576,extracellular region; GO:0016020,membrane; GO:0009664,plant-type cell wall organization	Pollen allergen
SMEL_003g171410.1	1.53	4.46	2.14	0.41	0.73	0.62	16	52	22	4	8	6	0.24	-2.058	0.00147697	0.0112915	down	SMEL3Ch03	3303361	3305021	-	SMEL_003g171410.1.01	--	K14611 solute carrier family 23 (nucleobase transporter), member 1/2 | (RefSeq) nucleobase-ascorbate transporter 3-like (A)	hypothetical protein BC332_10527 [Capsicum chinense]	--	SubName: Full=Uncharacterized protein {ECO:0000313|EMBL:PHU19376.1};	--	--	Glyoxalase/Bleomycin resistance protein/Dioxygenase superfamily
SMEL_003g171420.1	2.28	2.2	0.91	0.88	0.64	0.39	125	134	49	45	37	20	0.395	-1.339	0.0016208	0.0120644	down	SMEL3Ch03	3318405	3321776	+	SMEL_003g171420.1.01	--	K04733 interleukin-1 receptor-associated kinase 4 [EC:2.7.11.1] | (RefSeq) probable LRR receptor-like serine/threonine-protein kinase At4g36180 (A)	PREDICTED: probable LRR receptor-like serine/threonine-protein kinase At4g36180 [Solanum tuberosum]	RecName: Full=Probable LRR receptor-like serine/threonine-protein kinase At4g36180; EC=2.7.11.1; Flags: Precursor;	SubName: Full=Uncharacterized protein {ECO:0000313|EnsemblPlants:PGSC0003DMT400058132};	--	GO:0016021,integral component of membrane; GO:0005886,plasma membrane; GO:0005524,ATP binding; GO:0004674,protein serine/threonine kinase activity	Leucine rich repeat
SMEL_003g171730.1	0.81	1.74	0.82	0	0	0	5	12	5	0	0	0	0.03	-5.048	0.00151598	0.0114875	down	SMEL3Ch03	3674056	3675083	-	SMEL_003g171730.1.01	--	K14411 RNA-binding protein Musashi | (RefSeq) protein gar2 (A)	PREDICTED: protein IQ-DOMAIN 1-like [Nicotiana tabacum]	RecName: Full=Protein IQ-DOMAIN 1 {ECO:0000303|PubMed:15960618};	SubName: Full=protein IQ-DOMAIN 1-like {ECO:0000313|RefSeq:XP_016464680.1};	--	GO:0005737,cytoplasm; GO:0005874,microtubule; GO:0005634,nucleus; GO:0005516,calmodulin binding; GO:0008017,microtubule binding	IQ calmodulin-binding motif
SMEL_003g171770.1	40.44	62.32	31.49	21.23	20.92	17.3	574	983	438	281	311	227	0.491	-1.025	4.48154e-05	0.000671775	down	SMEL3Ch03	3714004	3716680	+	SMEL_003g171770.1.01	--	K00588 caffeoyl-CoA O-methyltransferase [EC:2.1.1.104] | (RefSeq) probable caffeoyl-CoA O-methyltransferase At4g26220 (A)	Caffeoyl-CoA O-methyltransferase [Capsicum baccatum]	RecName: Full=Probable caffeoyl-CoA O-methyltransferase At4g26220; EC=2.1.1.104; AltName: Full=Trans-caffeoyl-CoA 3-O-methyltransferase; Short=CCoAMT; Short=CCoAOMT;	SubName: Full=Caffeoyl-CoA O-methyltransferase {ECO:0000313|EMBL:PHT49983.1};	O-methyltransferase	GO:0005829,cytosol; GO:0042409,caffeoyl-CoA O-methyltransferase activity; GO:0046872,metal ion binding; GO:0009809,lignin biosynthetic process	O-methyltransferase
SMEL_003g171810.1	3.69	3.83	6.08	1.56	1.49	1.65	104	120	168	41	44	43	0.376	-1.41	2.30374e-05	0.000388882	down	SMEL3Ch03	3735346	3739878	-	SMEL_003g171810.1.01	--	K21777 G2/mitotic-specific cyclin-B, other | (RefSeq) G2/mitotic-specific cyclin-2-like (A)	PREDICTED: G2/mitotic-specific cyclin-2-like [Solanum lycopersicum]	RecName: Full=G2/mitotic-specific cyclin-1; AltName: Full=B-like cyclin; AltName: Full=CycMs1;	SubName: Full=Uncharacterized protein {ECO:0000313|EnsemblPlants:Solyc03g032190.2.1};	Cyclin B and related kinase-activating proteins	GO:0005634,nucleus; GO:0007049,cell cycle; GO:0051301,cell division	Cyclin, N-terminal domain
SMEL_003g171930.1	13.36	13.58	3.64	2.22	2.53	1.87	116	131	31	18	23	15	0.243	-2.038	5.4471e-05	0.000791193	down	SMEL3Ch03	3876271	3876804	+	SMEL_003g171930.1.01	--	K15706 E3 ubiquitin-protein ligase RNF167 [EC:2.3.2.27] | (RefSeq) RING-H2 finger protein ATL80 (A)	PREDICTED: RING-H2 finger protein ATL8-like [Solanum lycopersicum]	RecName: Full=RING-H2 finger protein ATL80; EC=2.3.2.27 {ECO:0000305}; AltName: Full=RING-type E3 ubiquitin transferase ATL80 {ECO:0000305};	SubName: Full=Uncharacterized protein {ECO:0000313|EnsemblPlants:Solyc03g032060.1.1};	FOG: Predicted E3 ubiquitin ligase	GO:0016021,integral component of membrane; GO:0005886,plasma membrane; GO:0046872,metal ion binding; GO:0061630,ubiquitin protein ligase activity; GO:0070417,cellular response to cold; GO:0006952,defense response; GO:0043161,proteasome-mediated ubiquitin-dependent protein catabolic process; GO:0009909,regulation of flower development; GO:0010966,regulation of phosphate transport; GO:0010200,respo…	Ring finger domain
SMEL_003g172050.1	3.71	3.26	1.26	0.88	1.02	0.8	45	44	15	10	13	9	0.368	-1.441	0.00731179	0.0385234	down	SMEL3Ch03	4087733	4088479	+	SMEL_003g172050.1.01	--	--	PREDICTED: uncharacterized protein LOC107059859 [Solanum tuberosum]	--	SubName: Full=Putative ovule protein {ECO:0000313|EMBL:JAP25753.1};	--	GO:0016021,integral component of membrane	Domain of unknown function (DUF4408)
SMEL_003g172470.1	67.22	73.4	65.08	22.28	9.8	13.35	1035	1256	982	320	158	190	0.242	-2.05	1.27375e-13	1.67218e-11	down	SMEL3Ch03	5000608	5002897	+	SMEL_003g172470.1.01	--	K01602 ribulose-bisphosphate carboxylase small chain [EC:4.1.1.39] | (RefSeq) ribulose bisphosphate carboxylase small chain 8B, chloroplastic (A)	RecName: Full=Ribulose bisphosphate carboxylase small chain 8B, chloroplastic; Short=RuBisCO small subunit 8B; Flags: Precursor CAA31994.1 ribulose bisphosphate carboxylase [Nicotiana plumbaginifolia]	RecName: Full=Ribulose bisphosphate carboxylase small chain 8B, chloroplastic; Short=RuBisCO small subunit 8B; EC=4.1.1.39; Flags: Precursor;	RecName: Full=Ribulose bisphosphate carboxylase small chain {ECO:0000256|RuleBase:RU003627}; EC=4.1.1.39 {ECO:0000256|RuleBase:RU003627};	--	GO:0009507,chloroplast; GO:0004497,monooxygenase activity; GO:0016984,ribulose-bisphosphate carboxylase activity; GO:0009853,photorespiration; GO:0019253,reductive pentose-phosphate cycle	Ribulose bisphosphate carboxylase, small chain
SMEL_003g172580.1	24.22	26.13	14.98	8.62	5.93	7.53	226	271	137	75	58	65	0.374	-1.418	1.85536e-07	5.99752e-06	down	SMEL3Ch03	5188949	5189522	+	SMEL_003g172580.1.01	--	--	Non-specific lipid-transfer protein 2 [Capsicum baccatum]	RecName: Full=Non-specific lipid-transfer protein 2 {ECO:0000303|PubMed:23913675}; AltName: Full=Allergen Api g 6.0101 {ECO:0000303|PubMed:23913675}; AltName: Allergen=Api g 6 {ECO:0000303|PubMed:23913675};	SubName: Full=Non-specific lipid-transfer protein 2 {ECO:0000313|EMBL:PHT49897.1};	--	GO:0008289,lipid binding; GO:0006869,lipid transport	--
SMEL_003g172610.1	526.03	404.68	313.56	155.99	129.42	163.32	2386	2040	1394	660	615	685	0.4	-1.32	1.2163e-10	8.67446e-09	down	SMEL3Ch03	5288305	5288583	-	SMEL_003g172610.1.01	--	K17497 phosphomannomutase [EC:5.4.2.8] | (RefSeq) phosphomannomutase-like (A)	Non-specific lipid-transfer protein 2 [Capsicum chinense]	RecName: Full=Non-specific lipid-transfer protein 2 {ECO:0000303|PubMed:23913675}; AltName: Full=Allergen Api g 6.0101 {ECO:0000303|PubMed:23913675}; AltName: Allergen=Api g 6 {ECO:0000303|PubMed:23913675};	SubName: Full=Putative non-specific lipid-transfer protein 2-like {ECO:0000313|EMBL:JAP12123.1};	--	GO:0008289,lipid binding; GO:0006869,lipid transport	Probable lipid transfer
SMEL_003g172890.1	8.01	10.55	8.42	1.68	2.13	1.16	97	142	100	19	27	13	0.204	-2.293	5.02196e-12	4.83681e-10	down	SMEL3Ch03	6268586	6271441	+	SMEL_003g172890.1.01	--	K10752 histone-binding protein RBBP4 | (RefSeq) heavy metal-associated isoprenylated plant protein 26-like (A)	PREDICTED: heavy metal-associated isoprenylated plant protein 21-like [Solanum lycopersicum]	RecName: Full=Heavy metal-associated isoprenylated plant protein 21 {ECO:0000303|PubMed:21072340, ECO:0000303|PubMed:23368984}; Short=AtHIP21 {ECO:0000303|PubMed:23368984}; Short=AtHIPP21 {ECO:0000303|PubMed:21072340, ECO:0000303|PubMed:23368984}; Flags: Precursor;	SubName: Full=Uncharacterized protein {ECO:0000313|EnsemblPlants:PGSC0003DMT400043034};	Copper chaperone	GO:0005737,cytoplasm; GO:0016020,membrane; GO:0046914,transition metal ion binding; GO:0055073,cadmium ion homeostasis; GO:0046916,cellular transition metal ion homeostasis; GO:0071585,detoxification of cadmium ion; GO:0030001,metal ion transport	Heavy-metal-associated domain
SMEL_003g173190.1	0.74	1.44	1.01	0.26	0	0	6	13	8	2	0	0	0.088	-3.507	0.00971638	0.0476026	down	SMEL3Ch03	7211391	7212165	-	SMEL_003g173190.1.01	--	K03574 8-oxo-dGTP diphosphatase [EC:3.6.1.55] | (RefSeq) nudix hydrolase 1-like (A)	PREDICTED: nudix hydrolase 1-like [Solanum tuberosum]	RecName: Full=Nudix hydrolase 1; Short=AtNUDT1; AltName: Full=7,8-dihydro-8-oxoguanine-triphosphatase; AltName: Full=8-oxo-dGTP diphosphatase; Short=8-oxo-dGTPase; EC=3.6.1.55; AltName: Full=Dihydroneopterin triphosphate diphosphatase; EC=3.6.1.67 {ECO:0000269|PubMed:15611104}; AltName: Full=Dihydroneopterin triphosphate pyrophosphohydrolase; Short=DHNTP pyrophosphohydrolase; AltName: Full=NADH p…	SubName: Full=Uncharacterized protein {ECO:0000313|EnsemblPlants:PGSC0003DMT400077788};	--	GO:0005829,cytosol; GO:0035539,8-oxo-7,8-dihydrodeoxyguanosine triphosphate pyrophosphatase activity; GO:0008413,8-oxo-7,8-dihydroguanosine triphosphate pyrophosphatase activity; GO:0019177,dihydroneopterin triphosphate pyrophosphohydrolase activity; GO:0046872,metal ion binding; GO:0000210,NAD+ diphosphatase activity; GO:0006974,cellular response to DNA damage stimulus; GO:0006203,dGTP catabolic…	NUDIX domain
SMEL_003g173270.1	0.13	0.09	0.14	1.01	0.74	1.7	8	6	8	57	47	95	10.747	3.426	4.73055e-11	3.63811e-09	up	SMEL3Ch03	7439949	7444150	-	SMEL_003g173270.1.01	--	K13420 LRR receptor-like serine/threonine-protein kinase FLS2 [EC:2.7.11.1] | (RefSeq) probable LRR receptor-like serine/threonine-protein kinase At3g47570 (A)	PREDICTED: probable LRR receptor-like serine/threonine-protein kinase At3g47570 [Solanum tuberosum]	RecName: Full=LRR receptor-like serine/threonine-protein kinase FLS2; EC=2.7.11.1; AltName: Full=Protein FLAGELLIN-SENSING 2; AltName: Full=Protein FLAGELLIN-SENSITIVE 2; Flags: Precursor;	SubName: Full=Uncharacterized protein {ECO:0000313|EnsemblPlants:PGSC0003DMT400068787};	--	GO:0005768,endosome; GO:0010008,endosome membrane; GO:0016021,integral component of membrane; GO:0016020,membrane; GO:0005886,plasma membrane; GO:0005524,ATP binding; GO:0004675,transmembrane receptor protein serine/threonine kinase activity; GO:0052544,defense response by callose deposition in cell wall; GO:0042742,defense response to bacterium; GO:0016045,detection of bacterium; GO:0006898,rece…	Leucine rich repeat
SMEL_003g173670.1	0.23	0.81	0	1.45	2.8	2.92	1	4	0	6	13	12	7.553	2.917	0.00504189	0.0292563	up	SMEL3Ch03	8327895	8328167	+	SMEL_003g173670.1.01	--	--	High mobility group B protein 9 [Capsicum baccatum]	RecName: Full=High mobility group B protein 9; AltName: Full=Nucleosome/chromatin assembly factor group D 09; Short=Nucleosome/chromatin assembly factor group D 9; AltName: Full=Protein NUCLEAR FUSION DEFECTIVE 9 {ECO:0000303|PubMed:16698901};	SubName: Full=High mobility group B protein 9 {ECO:0000313|EMBL:PHT32711.1};	HMG box-containing protein	GO:0005634,nucleus; GO:0003677,DNA binding; GO:0003700,DNA-binding transcription factor activity; GO:0000741,karyogamy; GO:0010197,polar nucleus fusion; GO:0006355,regulation of transcription, DNA-templated; GO:0006351,transcription, DNA-templated	--
SMEL_003g174060.1	56.28	51.19	37.9	17.64	11.77	12.47	1474	1490	973	431	323	302	0.318	-1.653	6.09255e-16	1.12119e-13	down	SMEL3Ch03	9901905	9904416	-	SMEL_003g174060.1.01	--	K20556 cytochrome P450 family 76 subfamily C | (RefSeq) geraniol 8-hydroxylase-like (A)	PREDICTED: geraniol 8-hydroxylase-like [Nicotiana tomentosiformis]	RecName: Full=Geraniol 8-hydroxylase; EC=1.14.13.152; AltName: Full=Cytochrome P450 76B6; AltName: Full=Geraniol 10-hydroxylase; Short=CrG10H;	SubName: Full=geraniol 8-hydroxylase-like {ECO:0000313|RefSeq:XP_016455763.1};	Cytochrome P450 CYP2 subfamily	GO:0005789,endoplasmic reticulum membrane; GO:0016021,integral component of membrane; GO:0102811,geraniol 10-hydroxylase activity; GO:0020037,heme binding; GO:0005506,iron ion binding; GO:0016709,oxidoreductase activity, acting on paired donors, with incorporation or reduction of molecular oxygen, NAD(P)H as one donor, and incorporation of one atom of oxygen; GO:0016099,monoterpenoid biosynthetic…	Cytochrome P450
SMEL_003g174070.1	4.94	7.54	2.85	1.31	0.75	0.31	69	117	39	17	11	4	0.171	-2.55	2.52889e-06	5.90294e-05	down	SMEL3Ch03	9912506	9915332	-	SMEL_003g174070.1.01	--	K20802 (R)-mandelonitrile lyase [EC:4.1.2.10] | (RefSeq) alpha-hydroxynitrile lyase (A)	salicylic acid-binding protein 2 [Quercus suber]	RecName: Full=Salicylic acid-binding protein 2; Short=NtSABP2; EC=3.1.1.-; AltName: Full=Methyl salicylate esterase;	SubName: Full=Uncharacterized protein {ECO:0000313|EMBL:OWM66289.1};	--	GO:0016298,lipase activity; GO:0080031,methyl salicylate esterase activity; GO:0009862,systemic acquired resistance, salicylic acid mediated signaling pathway	alpha/beta hydrolase fold
SMEL_003g174590.1	38.19	30.77	43.51	72.23	106.74	99.19	488	437	545	861	1429	1172	2.719	1.443	4.27897e-09	2.21792e-07	up	SMEL3Ch03	14204729	14205604	+	SMEL_003g174590.1.01	--	K10249 elongation of very long chain fatty acids protein 4 [EC:2.3.1.199] | (RefSeq) hypothetical protein (A)	PREDICTED: elongation of fatty acids protein 3-like [Capsicum annuum]	RecName: Full=Elongation of fatty acids protein 3-like; Short=Protein ELO3-like; EC=2.3.1.-; AltName: Full=Protein HIGH EXPRESSION OF OSMOTICALLY RESPONSIVE GENES 3; AltName: Full=Very long-chain fatty acid condensing enzyme HOS3; Short=VLCFA condensing enzyme HOS3;	SubName: Full=Elongation of fatty acids protein 3-like {ECO:0000313|EMBL:PHT83534.1};	Fatty acyl-CoA elongase/Polyunsaturated fatty acid specific elongation enzyme	GO:0030176,integral component of endoplasmic reticulum membrane; GO:0009922,fatty acid elongase activity; GO:0071215,cellular response to abscisic acid stimulus; GO:0030497,fatty acid elongation; GO:0034625,fatty acid elongation, monounsaturated fatty acid; GO:0034626,fatty acid elongation, polyunsaturated fatty acid; GO:0019367,fatty acid elongation, saturated fatty acid; GO:0030148,sphingolipid…	GNS1/SUR4 family
SMEL_003g175150.1	24.64	66.35	19.45	1.06	4.46	3.5	274	820	212	11	52	36	0.093	-3.434	3.72228e-10	2.45112e-08	down	SMEL3Ch03	21531244	21532338	+	SMEL_003g175150.1.01	--	K13993 HSP20 family protein | (RefSeq) small heat shock protein, chloroplastic-like (A)	PREDICTED: small heat shock protein, chloroplastic-like [Solanum tuberosum]	RecName: Full=Small heat shock protein, chloroplastic; Flags: Precursor;	SubName: Full=Uncharacterized protein {ECO:0000313|EnsemblPlants:PGSC0003DMT400031252};	Molecular chaperone (small heat-shock protein Hsp26/Hsp42)	GO:0009507,chloroplast	Hsp20/alpha crystallin family
SMEL_003g175550.1	17.91	14.83	11.22	8.04	5.18	4.56	650	598	399	272	197	153	0.446	-1.165	3.68081e-06	8.22833e-05	down	SMEL3Ch03	24264332	24266821	+	SMEL_003g175550.1.01	--	K03063 26S proteasome regulatory subunit T3 | (RefSeq) 26S protease regulatory subunit 6B homolog (A)	BTB/POZ domain-containing protein [Capsicum baccatum]	RecName: Full=BTB/POZ domain-containing protein At1g67900;	SubName: Full=BTB/POZ domain-containing protein {ECO:0000313|EMBL:PHT34370.1};	--	GO:0016567,protein ubiquitination	NPH3 family
SMEL_003g175610.1	40.25	61.48	24.15	23.72	17.74	12.87	602	1022	354	331	278	178	0.479	-1.062	0.00141442	0.0108778	down	SMEL3Ch03	24639634	24640733	+	SMEL_003g175610.1.01	--	K04422 mitogen-activated protein kinase kinase kinase 13 [EC:2.7.11.25] | (RefSeq) serine/threonine-protein kinase EDR1 isoform X1 (A)	PREDICTED: uncharacterized protein LOC107020599 isoform X1 [Solanum pennellii]	--	SubName: Full=Uncharacterized protein {ECO:0000313|EnsemblPlants:PGSC0003DMT400047889};	--	--	PB1 domain
SMEL_003g175920.1	3.47	4.02	4.64	1.92	1.63	1.04	83	107	109	43	41	23	0.414	-1.271	9.48076e-05	0.00124622	down	SMEL3Ch03	26388650	26390951	+	SMEL_003g175920.1.01	--	K02537 mitotic spindle assembly checkpoint protein MAD2 | (RefSeq) mitotic spindle checkpoint protein MAD2 (A)	PREDICTED: mitotic spindle checkpoint protein MAD2 [Capsicum annuum]	RecName: Full=Mitotic spindle checkpoint protein MAD2 {ECO:0000303|PubMed:19710914}; AltName: Full=Mitotic arrest deficient protein 2;	SubName: Full=mitotic spindle checkpoint protein MAD2 {ECO:0000313|RefSeq:XP_016546620.1};	Spindle assembly checkpoint protein	GO:0010369,chromocenter; GO:0000777,condensed chromosome kinetochore; GO:0005737,cytoplasm; GO:0000776,kinetochore; GO:0005828,kinetochore microtubule; GO:0005635,nuclear envelope; GO:0005634,nucleus; GO:0005876,spindle microtubule; GO:0051301,cell division; GO:0007094,mitotic spindle assembly checkpoint; GO:0007346,regulation of mitotic cell cycle	HORMA domain
SMEL_003g176200.1	5.66	2.95	1.89	18.26	83.46	15.28	119	69	39	358	1838	297	12.492	3.643	2.54517e-05	0.000420678	up	SMEL3Ch03	28501806	28504356	-	SMEL_003g176200.1.01	--	K15382 solute carrier family 50 (sugar transporter) | (RefSeq) bidirectional sugar transporter N3-like (A)	PREDICTED: bidirectional sugar transporter N3-like [Solanum pennellii]	RecName: Full=Bidirectional sugar transporter SWEET15 {ECO:0000305}; Short=VvSWEET15 {ECO:0000305};	RecName: Full=Bidirectional sugar transporter SWEET {ECO:0000256|RuleBase:RU910715};	Multitransmembrane protein	GO:0000139,Golgi membrane; GO:0005887,integral component of plasma membrane; GO:0008515,sucrose transmembrane transporter activity; GO:0071215,cellular response to abscisic acid stimulus; GO:0071470,cellular response to osmotic stress; GO:0071446,cellular response to salicylic acid stimulus; GO:0009793,embryo development ending in seed dormancy; GO:0010150,leaf senescence; GO:0010431,seed maturat…	Sugar efflux transporter for intercellular exchange
SMEL_003g176250.1	6.98	6.99	5.29	3.14	2.69	2.68	62	69	46	26	25	22	0.487	-1.037	0.00135205	0.0104969	down	SMEL3Ch03	31487534	31488079	-	SMEL_003g176250.1.01	--	K03004 DNA-directed RNA polymerase I subunit RPA43 | (RefSeq) dr1-associated corepressor homolog (A)	PREDICTED: nuclear transcription factor Y subunit C-2 [Solanum lycopersicum]	RecName: Full=Nuclear transcription factor Y subunit C-2 {ECO:0000305}; Short=OsNF-YC2 {ECO:0000303|PubMed:26542958}; AltName: Full=Transcriptional activator HAP5C {ECO:0000305}; Short=OsHAP5C {ECO:0000303|PubMed:18193457};	SubName: Full=Uncharacterized protein {ECO:0000313|EnsemblPlants:Solyc05g015330.1.1};	CCAAT-binding factor, subunit C (HAP5)	GO:0005737,cytoplasm; GO:0005634,nucleus; GO:0003677,DNA binding; GO:0046982,protein heterodimerization activity; GO:0009908,flower development; GO:0048579,negative regulation of long-day photoperiodism, flowering; GO:0006355,regulation of transcription, DNA-templated; GO:0006351,transcription, DNA-templated	Histone-like transcription factor (CBF/NF-Y) and archaeal histone
SMEL_003g176490.1	7.59	10.31	14.59	16.59	34.69	35.43	155	234	292	316	742	669	2.926	1.549	3.73927e-05	0.000579474	up	SMEL3Ch03	33958384	33960960	+	SMEL_003g176490.1.01	--	--	PREDICTED: probable inactive poly [ADP-ribose]	RecName: Full=Probable inactive poly [ADP-ribose] polymerase SRO2; AltName: Full=Protein SIMILAR TO RCD ONE 2;	RecName: Full=Poly [ADP-ribose] polymerase {ECO:0000256|RuleBase:RU362114}; Short=PARP {ECO:0000256|RuleBase:RU362114}; EC=2.4.2.30 {ECO:0000256|RuleBase:RU362114};	--	GO:0005634,nucleus; GO:0003950,NAD+ ADP-ribosyltransferase activity; GO:0007275,multicellular organism development	RCD1-SRO-TAF4 (RST) plant domain
SMEL_003g176760.1	4.43	3.8	3.41	1.95	1.24	1.09	171	163	129	70	50	39	0.403	-1.31	1.48315e-06	3.71889e-05	down	SMEL3Ch03	36249765	36255417	+	SMEL_003g176760.1.01	--	K04733 interleukin-1 receptor-associated kinase 4 [EC:2.7.11.1] | (RefSeq) protein NSP-INTERACTING KINASE 2 (A)	PREDICTED: protein NSP-INTERACTING KINASE 3-like isoform X1 [Capsicum annuum]	RecName: Full=Protein NSP-INTERACTING KINASE 3; EC=2.7.11.1; AltName: Full=LRR receptor-like serine/threonine-protein kinase NIK3; Flags: Precursor;	SubName: Full=protein NSP-INTERACTING KINASE 3-like isoform X1 {ECO:0000313|RefSeq:XP_016548009.1, ECO:0000313|RefSeq:XP_016548010.1};	--	GO:0016021,integral component of membrane; GO:0005886,plasma membrane; GO:0005524,ATP binding; GO:0004675,transmembrane receptor protein serine/threonine kinase activity; GO:0007166,cell surface receptor signaling pathway; GO:0006952,defense response; GO:0006468,protein phosphorylation; GO:0016032,viral process	Protein kinase domain
SMEL_003g178110.1	29.95	34.2	90.73	83.72	136.78	112.11	130	165	386	339	622	450	2.312	1.209	0.00680957	0.0366742	up	SMEL3Ch03	52106971	52107237	-	SMEL_003g178110.1.01	--	--	--	--	--	--	--	--
SMEL_003g178320.1	1.22	1.55	0.28	0.05	0.04	0	27	38	6	1	1	0	0.034	-4.867	0.000131292	0.00162657	down	SMEL3Ch03	53222331	53227058	+	SMEL_003g178320.1.01	--	K13033 (S)-hydroxynitrile lyase [EC:4.1.2.47] | (RefSeq) (S)-hydroxynitrile lyase (A)	methyl jasmonate esterase [Solanum tuberosum]	RecName: Full=Salicylic acid-binding protein 2; Short=NtSABP2; EC=3.1.1.-; AltName: Full=Methyl salicylate esterase;	SubName: Full=Methyl jasmonate esterase {ECO:0000313|EMBL:AAV87151.1};	--	GO:0016298,lipase activity; GO:0080031,methyl salicylate esterase activity; GO:0009862,systemic acquired resistance, salicylic acid mediated signaling pathway	alpha/beta hydrolase fold
SMEL_003g178450.1	3.71	5.26	5.8	6	7.38	13.71	130	205	199	196	271	444	2.024	1.017	0.00555371	0.0314385	up	SMEL3Ch03	58875479	58880549	+	SMEL_003g178450.1.01	--	K07393 glutathionyl-hydroquinone reductase [EC:1.8.5.7] | (RefSeq) uncharacterized protein LOC103649984 (A)	PREDICTED: lipase [Solanum tuberosum]	--	SubName: Full=Uncharacterized protein {ECO:0000313|EnsemblPlants:PGSC0003DMT400019853};	--	GO:0016021,integral component of membrane	--
SMEL_003g178540.1	21.78	27.67	16.02	14.94	7.34	7.28	136	192	98	87	48	42	0.496	-1.011	0.00349976	0.0219518	down	SMEL3Ch03	59219604	59219987	-	SMEL_003g178540.1.01	--	--	PREDICTED: uncharacterized protein LOC104114986 [Nicotiana tomentosiformis]	--	SubName: Full=Uncharacterized protein {ECO:0000313|EnsemblPlants:PGSC0003DMT400047922};	--	--	--
SMEL_003g178710.1	1.46	2.13	4.59	9.13	12.53	14.07	37	60	114	216	333	330	4.737	2.244	2.25191e-07	7.07533e-06	up	SMEL3Ch03	60383339	60387713	+	SMEL_003g178710.1.01	--	K14664 IAA-amino acid hydrolase [EC:3.5.1.-] | (RefSeq) IAA-amino acid hydrolase ILR1-like 4 (A)	PREDICTED: IAA-amino acid hydrolase ILR1-like 4 [Capsicum annuum]	RecName: Full=IAA-amino acid hydrolase ILR1-like 4 {ECO:0000303|PubMed:10072397}; EC=3.5.1.- {ECO:0000305}; AltName: Full=jasmonoyl-L-amino acid hydrolase {ECO:0000305}; EC=3.5.1.127 {ECO:0000269|PubMed:24052260}; Flags: Precursor;	SubName: Full=IAA-amino acid hydrolase ILR1-like 4 {ECO:0000313|RefSeq:XP_016548414.1};	--	GO:0005783,endoplasmic reticulum; GO:0005788,endoplasmic reticulum lumen; GO:0005886,plasma membrane; GO:0010179,IAA-Ala conjugate hydrolase activity; GO:0046872,metal ion binding; GO:0008152,metabolic process; GO:0009611,response to wounding	Peptidase family M20/M25/M40
SMEL_003g178820.1	7.88	8.57	3.05	2.7	2.37	1.79	200	242	76	64	63	42	0.393	-1.349	0.000415399	0.00406661	down	SMEL3Ch03	60771305	60773205	+	SMEL_003g178820.1.01	--	K00512 steroid 17alpha-monooxygenase / 17alpha-hydroxyprogesterone deacetylase [EC:1.14.14.19 1.14.14.32] | (RefSeq) premnaspirodiene oxygenase-like (A)	PREDICTED: premnaspirodiene oxygenase-like, partial [Solanum tuberosum]	RecName: Full=Premnaspirodiene oxygenase; Short=HPO; EC=1.14.13.121; AltName: Full=Cytochrome P450 71D55;	SubName: Full=Uncharacterized protein {ECO:0000313|EnsemblPlants:PGSC0003DMT400040307};	Cytochrome P450 CYP2 subfamily	GO:0016021,integral component of membrane; GO:0020037,heme binding; GO:0005506,iron ion binding; GO:0004497,monooxygenase activity; GO:0016705,oxidoreductase activity, acting on paired donors, with incorporation or reduction of molecular oxygen	Cytochrome P450
SMEL_003g178950.1	0.07	0.06	0.31	1.06	4.05	6.19	2	2	9	29	124	167	28.125	4.814	6.23488e-10	3.94194e-08	up	SMEL3Ch03	61003101	61006641	-	SMEL_003g178950.1.01	--	K11820 N-hydroxythioamide S-beta-glucosyltransferase [EC:2.4.1.195] | (RefSeq) UDP-glycosyltransferase 74B1-like (A)	PREDICTED: UDP-glycosyltransferase 74B1-like [Solanum tuberosum]	RecName: Full=UDP-glycosyltransferase 74B1; EC=2.4.1.-; AltName: Full=N-hydroxythioamide S-beta-glucosyltransferase; EC=2.4.1.195; AltName: Full=Thiohydroximate S-glucosyltransferase;	SubName: Full=Uncharacterized protein {ECO:0000313|EnsemblPlants:PGSC0003DMT400040295};	UDP-glucuronosyl and UDP-glucosyl transferase	GO:0043231,intracellular membrane-bounded organelle; GO:0080043,quercetin 3-O-glucosyltransferase activity; GO:0080044,quercetin 7-O-glucosyltransferase activity; GO:0047251,thiohydroximate beta-D-glucosyltransferase activity; GO:0102659,UDP-glucose: 4-methylthiobutylhydroximate S-glucosyltransferase activity; GO:0103100,UDP-glucose: 6-methylthiohexylhydroximate S-glucosyltransferase activity; GO…	UDP-glucoronosyl and UDP-glucosyl transferase
SMEL_003g179240.1	3.35	3.97	2.48	1.66	0.61	1.18	95	125	69	44	18	31	0.387	-1.37	0.000408331	0.0040115	down	SMEL3Ch03	61458613	61462940	+	SMEL_003g179240.1.01	--	K14638 solute carrier family 15 (peptide/histidine transporter), member 3/4 | (RefSeq) protein NRT1/ PTR FAMILY 1.2-like (A)	PREDICTED: protein NRT1/ PTR FAMILY 1.2-like [Nicotiana attenuata]	RecName: Full=Protein NRT1/ PTR FAMILY 1.2; Short=AtNPF1.2; AltName: Full=Nitrate transporter 1.11;	SubName: Full=Uncharacterized protein {ECO:0000313|EnsemblPlants:PGSC0003DMT400010578};	H+/oligopeptide symporter	GO:0016021,integral component of membrane; GO:0005886,plasma membrane; GO:0080054,low-affinity nitrate transmembrane transporter activity; GO:0015706,nitrate transport	POT family
SMEL_003g179670.1	34.9	34.88	31.15	70.31	91	84.79	2031	2256	1777	3817	5549	4563	2.698	1.432	1.27438e-19	4.30594e-17	up	SMEL3Ch03	65921939	65928361	-	SMEL_003g179670.1.01	--	K08332 vacuolar protein 8 | (RefSeq) hypothetical protein (A)	PREDICTED: U-box domain-containing protein 45-like [Solanum lycopersicum]	RecName: Full=U-box domain-containing protein 45; EC=2.3.2.27; AltName: Full=Plant U-box protein 45; AltName: Full=RING-type E3 ubiquitin transferase PUB45 {ECO:0000305};	RecName: Full=RING-type E3 ubiquitin transferase {ECO:0000256|SAAS:SAAS00702733}; EC=2.3.2.27 {ECO:0000256|SAAS:SAAS00702733};	FOG: Armadillo/beta-catenin-like repeats	GO:0070696,transmembrane receptor protein serine/threonine kinase binding; GO:0004842,ubiquitin-protein transferase activity; GO:0016567,protein ubiquitination	U-box domain
SMEL_003g179990.1	10.48	10.15	13.27	50.4	59.91	69.33	669	720	830	3001	4006	4092	5.82	2.541	3.52734e-30	4.84681e-27	up	SMEL3Ch03	67069080	67076396	-	SMEL_003g179990.1.01	--	K05658 ATP-binding cassette, subfamily B (MDR/TAP), member 1 [EC:3.6.3.44] | (RefSeq) putative ABC transporter B family member 8 (A)	PREDICTED: putative ABC transporter B family member 8 [Solanum pennellii]	RecName: Full=Putative ABC transporter B family member 8; Short=ABC transporter ABCB.8; Short=AtABCB8; AltName: Full=P-glycoprotein 8; AltName: Full=Putative multidrug resistance protein 22;	SubName: Full=Uncharacterized protein {ECO:0000313|EnsemblPlants:Solyc03g093650.2.1};	Multidrug/pheromone exporter, ABC superfamily	GO:0016021,integral component of membrane; GO:0005524,ATP binding; GO:0042626,ATPase activity, coupled to transmembrane movement of substances	ABC transporter transmembrane region
SMEL_003g180350.1	1.93	1.64	0.39	0	0	0.18	35	33	7	0	0	3	0.05	-4.328	0.000198008	0.00225353	down	SMEL3Ch03	68657982	68659097	+	SMEL_003g180350.1.01	--	K07761 metalloendoproteinase 5-MMP [EC:3.4.24.-] | (RefSeq) metalloendoproteinase 5-MMP (A)	PREDICTED: metalloendoproteinase 3-MMP-like [Solanum tuberosum]	RecName: Full=Metalloendoproteinase 3-MMP {ECO:0000303|PubMed:10574937}; Short=At3-MMP {ECO:0000303|PubMed:10574937}; EC=3.4.24.- {ECO:0000305}; Flags: Precursor;	SubName: Full=Uncharacterized protein {ECO:0000313|EnsemblPlants:PGSC0003DMT400091802};	Gelatinase A and related matrix metalloproteases	GO:0031225,anchored component of membrane; GO:0031012,extracellular matrix; GO:0005886,plasma membrane; GO:0004222,metalloendopeptidase activity; GO:0008270,zinc ion binding	Matrixin
SMEL_003g180460.1	28.07	29.68	79.75	100.96	122.8	134.97	868	1020	2417	2912	3978	3859	2.806	1.488	0.000334726	0.00342895	up	SMEL3Ch03	68958495	68962940	+	SMEL_003g180460.1.01	--	K01087 trehalose 6-phosphate phosphatase [EC:3.1.3.12] | (RefSeq) trehalose-phosphate phosphatase A (A)	PREDICTED: trehalose-phosphate phosphatase A [Solanum tuberosum]	RecName: Full=Trehalose-phosphate phosphatase A; Short=AtTPPA; EC=3.1.3.12; AltName: Full=Trehalose 6-phosphate phosphatase;	RecName: Full=Trehalose 6-phosphate phosphatase {ECO:0000256|RuleBase:RU361117}; EC=3.1.3.12 {ECO:0000256|RuleBase:RU361117};	Trehalose-6-phosphate synthase component TPS1 and related subunits	GO:0004805,trehalose-phosphatase activity; GO:0005992,trehalose biosynthetic process	Trehalose-phosphatase
SMEL_003g180590.1	3.84	3.99	3.12	3.28	12.23	28.78	39	45	31	31	130	270	4.556	2.188	0.000491811	0.00467072	up	SMEL3Ch03	69428182	69428805	+	SMEL_003g180590.1.01	--	K01051 pectinesterase [EC:3.1.1.11] | (RefSeq) pectinesterase-like (A)	PREDICTED: 21 kDa protein-like [Solanum tuberosum]	RecName: Full=21 kDa protein; AltName: Full=1.2 protein; Flags: Precursor;	SubName: Full=Uncharacterized protein {ECO:0000313|EnsemblPlants:PGSC0003DMT400028042};	--	GO:0004857,enzyme inhibitor activity	Plant invertase/pectin methylesterase inhibitor
SMEL_003g180660.1	1102.17	1077.69	909.39	1493.78	2137.98	2412.21	10590	11508	8564	13388	21521	21431	2.174	1.121	2.5273e-07	7.80962e-06	up	SMEL3Ch03	69543856	69544446	-	SMEL_003g180660.1.01	--	K01051 pectinesterase [EC:3.1.1.11] | (RefSeq) pectinesterase (A)	PREDICTED: 21 kDa protein-like [Solanum tuberosum]	RecName: Full=21 kDa protein; AltName: Full=1.2 protein; Flags: Precursor;	SubName: Full=Pectinmethylesterase inhibitor {ECO:0000313|EMBL:AIT42249.1};	--	GO:0004857,enzyme inhibitor activity	Plant invertase/pectin methylesterase inhibitor
SMEL_003g180820.1	2.39	2.66	2.16	1.07	0.28	0.52	105	130	93	44	13	21	0.283	-1.822	2.25243e-05	0.000382411	down	SMEL3Ch03	69891737	69895220	+	SMEL_003g180820.1.01	--	--	PREDICTED: protein LONGIFOLIA 1 isoform X2 [Solanum tuberosum]	--	SubName: Full=Uncharacterized protein {ECO:0000313|EnsemblPlants:PGSC0003DMT400062317};	--	--	Domain of unknown function (DUF4378)
SMEL_003g180870.1	1.23	1.18	0.43	0.16	0.18	0.25	32	34	11	4	5	6	0.235	-2.087	0.00149478	0.011377	down	SMEL3Ch03	70041786	70044997	+	SMEL_003g180870.1.01	--	K05282 gibberellin 20-oxidase [EC:1.14.11.12] | (RefSeq) ga20ox1; gibberellin 20 oxidase 1-D (A)	gibberellin 20-oxidase (plasmid) [Solanum dulcamara]	RecName: Full=Gibberellin 20 oxidase 1; EC=1.14.11.-; AltName: Full=GA 20-oxidase 1; Short=AtGA20ox1; AltName: Full=Gibberellin C-20 oxidase 1;	SubName: Full=Gibberellin 20-oxidase {ECO:0000313|EMBL:CAB82616.1};	Iron/ascorbate family oxidoreductases	GO:0005737,cytoplasm; GO:0045544,gibberellin 20-oxidase activity; GO:0046872,metal ion binding; GO:0009908,flower development; GO:0009740,gibberellic acid mediated signaling pathway; GO:0009686,gibberellin biosynthetic process; GO:0048366,leaf development; GO:0009739,response to gibberellin; GO:0048575,short-day photoperiodism, flowering; GO:0009826,unidimensional cell growth	2OG-Fe(II) oxygenase superfamily
SMEL_003g180890.1	8.65	12.96	4.39	3.05	1.39	1.82	149	248	74	49	25	29	0.267	-1.905	1.22004e-05	0.000229227	down	SMEL3Ch03	70066792	70068375	+	SMEL_003g180890.1.01	--	K04733 interleukin-1 receptor-associated kinase 4 [EC:2.7.11.1] | (RefSeq) PTI1-like tyrosine-protein kinase At3g15890 isoform X1 (A)	hypothetical protein CQW23_07534 [Capsicum baccatum]	RecName: Full=PTI1-like tyrosine-protein kinase At3g15890; EC=2.7.10.2;	SubName: Full=Uncharacterized protein {ECO:0000313|EMBL:PHT53072.1};	Serine/threonine protein kinase	GO:0005886,plasma membrane; GO:0005524,ATP binding; GO:0004715,non-membrane spanning protein tyrosine kinase activity; GO:0004675,transmembrane receptor protein serine/threonine kinase activity; GO:0007166,cell surface receptor signaling pathway; GO:0006468,protein phosphorylation	Protein kinase domain
SMEL_003g180970.1	1.82	2.19	1.54	1.16	0.68	0.51	69	92	57	41	27	18	0.466	-1.101	0.00249332	0.0168713	down	SMEL3Ch03	70518003	70520330	-	SMEL_003g180970.1.01	--	K15333 tRNA guanosine-2'-O-methyltransferase [EC:2.1.1.34] | (RefSeq) uncharacterized protein LOC104224633 (A)	PREDICTED: subtilisin-like protease SBT1.7 [Solanum pennellii]	RecName: Full=Subtilisin-like protease SBT1.3 {ECO:0000303|PubMed:16193095}; EC=3.4.21.- {ECO:0000255|PROSITE-ProRule:PRU10082}; AltName: Full=Subtilase subfamily 1 member 3 {ECO:0000303|PubMed:16193095}; Short=AtSBT1.3 {ECO:0000303|PubMed:16193095}; Flags: Precursor;	SubName: Full=SBT2 protein {ECO:0000313|EMBL:CAA67430.1, ECO:0000313|EnsemblPlants:Solyc03g006970.1.1}; SubName: Full=Subtilisin-like protease {ECO:0000313|EMBL:CAA07000.1};	--	GO:0005576,extracellular region; GO:0004252,serine-type endopeptidase activity	Subtilase family
SMEL_003g181020.1	35.16	24.89	59.48	60.49	89.21	100.29	1017	800	1686	1632	2703	2682	2.275	1.186	0.00108496	0.00879011	up	SMEL3Ch03	70635623	70637483	-	SMEL_003g181020.1.01	--	K20888 xyloglucan galactosyltransferase MUR3 [EC:2.4.1.-] | (RefSeq) xyloglucan galactosyltransferase MUR3-like (A)	PREDICTED: xyloglucan galactosyltransferase KATAMARI1 homolog [Solanum tuberosum]	RecName: Full=Xyloglucan galactosyltransferase XLT2 {ECO:0000305}; EC=2.4.1.- {ECO:0000305}; AltName: Full=Glycosyltransferase 18 {ECO:0000303|PubMed:15020758}; Short=AtGT18 {ECO:0000303|PubMed:15020758}; AltName: Full=Protein XYLOGLUCAN L-SIDE CHAIN GALACTOSYLTRANSFERASE POSITION 2 {ECO:0000303|PubMed:22474179};	SubName: Full=Uncharacterized protein {ECO:0000313|EnsemblPlants:PGSC0003DMT400079639};	Acetylglucosaminyltransferase EXT1/exostosin 1	GO:0005794,Golgi apparatus; GO:0000139,Golgi membrane; GO:0016021,integral component of membrane; GO:0008378,galactosyltransferase activity; GO:0006486,protein glycosylation; GO:0009969,xyloglucan biosynthetic process	Exostosin family
SMEL_003g181210.1	2.76	3.17	4.56	1.2	0.95	1.31	116	148	188	47	42	51	0.36	-1.475	6.19391e-06	0.000128692	down	SMEL3Ch03	71506240	71510712	+	SMEL_003g181210.1.01	--	K16732 protein regulator of cytokinesis 1 | (RefSeq) 65-kDa microtubule-associated protein 3 (A)	PREDICTED: 65-kDa microtubule-associated protein 3 [Solanum tuberosum]	RecName: Full=65-kDa microtubule-associated protein 3; Short=AtMAP65-3; AltName: Full=Protein PLEIADE;	SubName: Full=Uncharacterized protein {ECO:0000313|EnsemblPlants:PGSC0003DMT400079660};	Microtubule-associated protein essential for anaphase spindle elongation	GO:0055028,cortical microtubule; GO:0005874,microtubule; GO:0005634,nucleus; GO:0009524,phragmoplast; GO:0009574,preprophase band; GO:0008017,microtubule binding; GO:0000911,cytokinesis by cell plate formation; GO:0052096,formation by symbiont of syncytium involving giant cell for nutrient acquisition from host; GO:0000226,microtubule cytoskeleton organization; GO:0046785,microtubule polymerizati…	Microtubule associated protein (MAP65/ASE1 family)
SMEL_003g181380.1	2.74	3.37	1.58	1.53	0.9	0.69	90	123	51	47	31	21	0.449	-1.156	0.00368359	0.0228338	down	SMEL3Ch03	72676481	72679207	+	SMEL_003g181380.1.01	--	--	PREDICTED: protein EXORDIUM-like 3 [Capsicum annuum]	RecName: Full=Protein EXORDIUM-like 3; Flags: Precursor;	SubName: Full=protein EXORDIUM-like 3 {ECO:0000313|RefSeq:XP_016564817.1};	--	GO:0048046,apoplast; GO:0005615,extracellular space; GO:0009505,plant-type cell wall; GO:0009506,plasmodesma; GO:0080167,response to karrikin	Phosphate-induced protein 1 conserved region
SMEL_003g181450.1	0.89	1.22	1.51	0.67	0.52	0.31	34	52	57	24	21	11	0.452	-1.146	0.00957173	0.047073	down	SMEL3Ch03	73017835	73022280	+	SMEL_003g181450.1.01	--	K04733 interleukin-1 receptor-associated kinase 4 [EC:2.7.11.1] | (RefSeq) protein NSP-INTERACTING KINASE 3-like (A)	PREDICTED: probable leucine-rich repeat receptor-like protein kinase At1g35710 [Solanum lycopersicum]	RecName: Full=Protein NSP-INTERACTING KINASE 2; EC=2.7.11.1; AltName: Full=LRR receptor-like serine/threonine-protein kinase NIK2; Flags: Precursor;	SubName: Full=Uncharacterized protein {ECO:0000313|EnsemblPlants:PGSC0003DMT400059219};	--	GO:0016021,integral component of membrane; GO:0005886,plasma membrane; GO:0005524,ATP binding; GO:0004675,transmembrane receptor protein serine/threonine kinase activity; GO:0007166,cell surface receptor signaling pathway; GO:0006952,defense response; GO:0006468,protein phosphorylation; GO:0016032,viral process	Protein tyrosine kinase
SMEL_003g181610.1	2.87	3.06	5.44	1.6	1.43	1.71	98	116	182	51	51	54	0.453	-1.144	0.00150107	0.011408	down	SMEL3Ch03	73625535	73631015	-	SMEL_003g181610.1.01	--	K10403 kinesin family member 22 | (RefSeq) kinesin-like protein KIF22 (A)	PREDICTED: kinesin-like protein KIF22 isoform X2 [Solanum pennellii]	RecName: Full=Kinesin-like protein KIN-10C {ECO:0000305};	SubName: Full=kinesin-like protein KIF22 isoform X4 {ECO:0000313|RefSeq:XP_016564587.1};	Kinesin-like protein	GO:0005871,kinesin complex; GO:0005874,microtubule; GO:0005524,ATP binding; GO:0016887,ATPase activity; GO:0008017,microtubule binding; GO:0003777,microtubule motor activity; GO:0007018,microtubule-based movement	Kinesin motor domain
SMEL_003g181740.1	0.14	0.19	0.68	1.54	1.67	1.85	4	6	19	41	50	49	5.46	2.449	4.01493e-05	0.00061343	up	SMEL3Ch03	73882504	73888113	-	SMEL_003g181740.1.01	--	K07425 long-chain fatty acid omega-monooxygenase [EC:1.14.14.80] | (RefSeq) cytokinin hydroxylase (A)	PREDICTED: cytokinin hydroxylase-like [Solanum tuberosum]	RecName: Full=Cytochrome P450 714A2; EC=1.14.-.-; AltName: Full=EUI-like P450 A2;	SubName: Full=Uncharacterized protein {ECO:0000313|EnsemblPlants:PGSC0003DMT400086965};	Cytochrome P450 CYP4/CYP19/CYP26 subfamilies	GO:0005789,endoplasmic reticulum membrane; GO:0016021,integral component of membrane; GO:0020037,heme binding; GO:0005506,iron ion binding; GO:0004497,monooxygenase activity; GO:0016705,oxidoreductase activity, acting on paired donors, with incorporation or reduction of molecular oxygen	Cytochrome P450
SMEL_003g181940.1	6.24	5.34	6.33	22.93	49.11	43.39	207	197	206	710	1708	1332	7.134	2.835	2.92471e-20	1.09602e-17	up	SMEL3Ch03	74255628	74258315	-	SMEL_003g181940.1.01	--	K23450 sarcoplasmic reticulum histidine-rich calcium-binding protein | (RefSeq) low-temperature-induced 65 kDa protein-like (A)	PREDICTED: low-temperature-induced 65 kDa protein-like isoform X2 [Solanum tuberosum]	RecName: Full=Low-temperature-induced 65 kDa protein; AltName: Full=Desiccation-responsive protein 29B;	SubName: Full=Uncharacterized protein {ECO:0000313|EnsemblPlants:PGSC0003DMT400037083};	--	GO:0009738,abscisic acid-activated signaling pathway; GO:0010150,leaf senescence; GO:0009737,response to abscisic acid; GO:0009409,response to cold; GO:0009651,response to salt stress; GO:0009414,response to water deprivation	CAP160 repeat
SMEL_003g182490.1	17.03	15.22	51.3	101.31	166.55	247.17	446	443	1317	2475	4570	5986	6.646	2.733	0.000131319	0.00162657	up	SMEL3Ch03	75607710	75609320	-	SMEL_003g182490.1.01	--	K03327 multidrug resistance protein, MATE family | (RefSeq) protein DETOXIFICATION 49 (A)	PREDICTED: protein DETOXIFICATION 49 [Solanum tuberosum]	RecName: Full=Protein DETOXIFICATION 49 {ECO:0000303|PubMed:11739388}; Short=AtDTX49 {ECO:0000303|PubMed:11739388}; AltName: Full=Multidrug and toxic compound extrusion protein 49 {ECO:0000305}; Short=MATE protein 49 {ECO:0000305}; AltName: Full=Protein NOVEL ION CARRIER 1 {ECO:0000303|Ref.1}; Short=Protein NIC1 {ECO:0000303|Ref.1};	RecName: Full=Protein DETOXIFICATION {ECO:0000256|RuleBase:RU004914}; AltName: Full=Multidrug and toxic compound extrusion protein {ECO:0000256|RuleBase:RU004914};	Uncharacterized membrane protein, predicted efflux pump	GO:0016021,integral component of membrane; GO:0015297,antiporter activity; GO:0015238,drug transmembrane transporter activity; GO:0006855,drug transmembrane transport	MatE
SMEL_003g182800.1	15.85	13.79	12.64	7.42	4.97	4.35	426	412	333	186	140	108	0.435	-1.202	9.2429e-08	3.22891e-06	down	SMEL3Ch03	76954424	76956280	-	SMEL_003g182800.1.01	--	--	PREDICTED: putative transporter arsB [Solanum lycopersicum]	RecName: Full=Silicon efflux transporter LSI2 {ECO:0000303|PubMed:17625566}; AltName: Full=Low silicon protein 2 {ECO:0000303|PubMed:17625566};	SubName: Full=Uncharacterized protein {ECO:0000313|EMBL:PHU23109.1};	Sodium sulfate symporter and related arsenite permeases	GO:0016021,integral component of membrane; GO:0005886,plasma membrane; GO:0055085,transmembrane transport	Citrate transporter
SMEL_003g182900.1	4.08	4.52	4.69	8.2	10.08	7.21	87	107	98	163	225	142	2.11	1.077	3.16676e-06	7.22015e-05	up	SMEL3Ch03	77056360	77057670	-	SMEL_003g182900.1.01	--	K10624 E3 ubiquitin-protein ligase RBBP6 [EC:2.3.2.27] | (RefSeq) E3 ubiquitin-protein ligase RBBP6-like (A)	PREDICTED: E3 ubiquitin-protein ligase RBBP6-like [Capsicum annuum]	RecName: Full=E3 ubiquitin ligase PQT3-like; EC=2.3.2.27 {ECO:0000250|UniProtKB:F4JP52};	SubName: Full=Uncharacterized protein {ECO:0000313|EMBL:PHT87301.1};	Predicted E3 ubiquitin ligase	GO:0005634,nucleus; GO:0003676,nucleic acid binding; GO:0016740,transferase activity; GO:0008270,zinc ion binding	DWNN domain
SMEL_003g183020.1	4.25	3.3	5.92	2.12	1.71	1.83	88	76	120	41	37	35	0.457	-1.128	0.00124558	0.00979498	down	SMEL3Ch03	77601801	77604708	+	SMEL_003g183020.1.01	--	--	PREDICTED: uncharacterized protein LOC107012402 [Solanum pennellii]	RecName: Full=Protein PATRONUS 1 {ECO:0000303|Ref.5}; AltName: Full=Protein COPPER MODIFIED RESISTANCE 1 {ECO:0000303|PubMed:24134393};	SubName: Full=Putative neuron navigator 1-like {ECO:0000313|EMBL:JAP23036.1};	--	GO:0005737,cytoplasm; GO:0005730,nucleolus; GO:0005634,nucleus; GO:0051301,cell division; GO:0007059,chromosome segregation; GO:0051321,meiotic cell cycle; GO:0034096,positive regulation of maintenance of meiotic sister chromatid cohesion; GO:2000711,positive regulation of maintenance of meiotic sister chromatid cohesion, centromeric; GO:0007346,regulation of mitotic cell cycle	--
SMEL_003g183190.1	77.95	163.67	55.6	39.29	46.46	41.37	3935	9182	2751	1850	2457	1931	0.479	-1.063	0.00172972	0.0127235	down	SMEL3Ch03	77775837	77780176	+	SMEL_003g183190.1.01	--	K04079 molecular chaperone HtpG | (RefSeq) heat shock protein 82 (A)	PREDICTED: heat shock protein 82 [Nicotiana tomentosiformis]	RecName: Full=Heat shock protein 83;	SubName: Full=heat shock protein 82-like {ECO:0000313|RefSeq:XP_016439373.1};	Molecular chaperone (HSP90 family)	GO:0005737,cytoplasm; GO:0005524,ATP binding; GO:0051082,unfolded protein binding; GO:0006457,protein folding; GO:0006950,response to stress	Hsp90 protein
SMEL_003g183230.1	27.08	25.17	12.85	10.27	7.13	6.75	243	251	113	86	67	56	0.412	-1.28	5.19875e-05	0.000764276	down	SMEL3Ch03	77817612	77818163	-	SMEL_003g183230.1.01	--	--	PREDICTED: uncharacterized protein PAM68-like [Capsicum annuum]	RecName: Full=Uncharacterized protein PAM68-like;	SubName: Full=uncharacterized protein PAM68-like {ECO:0000313|RefSeq:XP_016564514.1};	--	GO:0009507,chloroplast; GO:0009535,chloroplast thylakoid membrane; GO:0016021,integral component of membrane	Protein of unknown function (DUF3464)
SMEL_003g183360.1	5.2	5.31	7.45	2.89	1.62	2.06	52	59	73	27	17	19	0.398	-1.33	0.00069989	0.00613848	down	SMEL3Ch03	77963525	77964139	+	SMEL_003g183360.1.01	--	--	PREDICTED: uncharacterized protein LOC102578608 [Solanum tuberosum]	--	SubName: Full=Uncharacterized protein {ECO:0000313|EnsemblPlants:PGSC0003DMT400053841};	--	GO:0016021,integral component of membrane	Late embryogenesis abundant protein
SMEL_003g183550.1	0.55	0.53	0.23	2.39	4.98	1.7	24	26	10	98	229	69	7.697	2.944	1.36815e-09	7.96578e-08	up	SMEL3Ch03	78738712	78742951	+	SMEL_003g183550.1.01	--	K04733 interleukin-1 receptor-associated kinase 4 [EC:2.7.11.1] | (RefSeq) LOW QUALITY PROTEIN: G-type lectin S-receptor-like serine/threonine-protein kinase At5g24080 (A)	PREDICTED: G-type lectin S-receptor-like serine/threonine-protein kinase At5g24080 [Solanum tuberosum]	RecName: Full=G-type lectin S-receptor-like serine/threonine-protein kinase At5g24080; EC=2.7.11.1; Flags: Precursor;	SubName: Full=G-type lectin S-receptor-like serine/threonine-protein kinase At5g24080 isoform X1 {ECO:0000313|RefSeq:XP_016564458.1};	--	GO:0016021,integral component of membrane; GO:0005886,plasma membrane; GO:0005524,ATP binding; GO:0005516,calmodulin binding; GO:0030246,carbohydrate binding; GO:0004674,protein serine/threonine kinase activity; GO:0006468,protein phosphorylation; GO:0048544,recognition of pollen	Protein kinase domain
SMEL_003g183630.1	12.03	8.24	6.53	4.53	3.53	3.85	997	759	530	350	306	295	0.492	-1.022	1.17622e-05	0.000222696	down	SMEL3Ch03	78800286	78806370	-	SMEL_003g183630.1.01	--	K05666 ATP-binding cassette, subfamily C (CFTR/MRP), member 2 | (RefSeq) ABC transporter C family member 10-like (A)	PREDICTED: ABC transporter C family member 10-like [Solanum tuberosum]	RecName: Full=ABC transporter C family member 10; Short=ABC transporter ABCC.10; Short=AtABCC10; EC=3.6.3.44; AltName: Full=ATP-energized glutathione S-conjugate pump 14; AltName: Full=Glutathione S-conjugate-transporting ATPase 14; AltName: Full=Multidrug resistance-associated protein 14;	SubName: Full=Uncharacterized protein {ECO:0000313|EnsemblPlants:PGSC0003DMT400023487};	Multidrug resistance-associated protein/mitoxantrone resistance protein, ABC superfamily	GO:0016021,integral component of membrane; GO:0000325,plant-type vacuole; GO:0005774,vacuolar membrane; GO:0005524,ATP binding; GO:0042626,ATPase activity, coupled to transmembrane movement of substances; GO:0008559,xenobiotic transmembrane transporting ATPase activity; GO:0055085,transmembrane transport	ABC transporter
SMEL_003g183700.1	18.93	16.46	38.56	26.17	54.82	67.9	297	287	593	383	901	985	2.194	1.134	0.0100333	0.0487501	up	SMEL3Ch03	78893970	78899056	+	SMEL_003g183700.1.01	--	K06689 ubiquitin-conjugating enzyme E2 D [EC:2.3.2.23] | (RefSeq) SUMO-conjugating enzyme UBC9 (A)	SUMO-conjugating enzyme UBC9-like [Solanum tuberosum]	RecName: Full=SUMO-conjugating enzyme UBC9; EC=2.3.2.-; AltName: Full=RING-type E3 SUMO transferase UBC9; AltName: Full=UBCAT4B; AltName: Full=Ubiquitin carrier protein 9; AltName: Full=Ubiquitin-conjugating enzyme E2 9; AltName: Full=Ubiquitin-conjugating enzyme E2-17 kDa; AltName: Full=Ubiquitin-protein ligase 9;	SubName: Full=Ubiquitin-conjugating enzyme 8-like mRNA {ECO:0000313|EMBL:AFW90582.1};	Ubiquitin-protein ligase	GO:0005524,ATP binding; GO:0016740,transferase activity; GO:0016925,protein sumoylation	Ubiquitin-conjugating enzyme
SMEL_003g183800.1	25.7	24.47	14.97	5.15	5.3	3.86	310	328	177	58	67	43	0.244	-2.034	2.16378e-14	3.2553e-12	down	SMEL3Ch03	79148270	79150854	+	SMEL_003g183800.1.01	--	K15382 solute carrier family 50 (sugar transporter) | (RefSeq) bidirectional sugar transporter SWEET3-like (A)	PREDICTED: bidirectional sugar transporter SWEET3-like [Solanum tuberosum]	RecName: Full=Bidirectional sugar transporter SWEET3 {ECO:0000303|PubMed:21107422}; Short=AtSWEET3 {ECO:0000303|PubMed:21107422}; AltName: Full=Protein SUGARS WILL EVENTUALLY BE EXPORTED TRANSPORTERS 3 {ECO:0000303|PubMed:21107422};	RecName: Full=Bidirectional sugar transporter SWEET {ECO:0000256|RuleBase:RU910715};	Multitransmembrane protein	GO:0016021,integral component of membrane; GO:0005887,integral component of plasma membrane; GO:0051119,sugar transmembrane transporter activity; GO:0008643,carbohydrate transport	Sugar efflux transporter for intercellular exchange
SMEL_003g183930.1	53.69	37.72	27.67	71.87	147.99	73.81	1291	1008	652	1612	3728	1641	2.75	1.459	1.17813e-05	0.000222775	up	SMEL3Ch03	79338622	79341829	-	SMEL_003g183930.1.01	--	K14497 protein phosphatase 2C [EC:3.1.3.16] | (RefSeq) probable protein phosphatase 2C 51 (A)	PREDICTED: probable protein phosphatase 2C 51 isoform X1 [Solanum pennellii]	RecName: Full=Probable protein phosphatase 2C 51; Short=OsPP2C51; EC=3.1.3.16;	SubName: Full=probable protein phosphatase 2C 51 {ECO:0000313|RefSeq:XP_016445091.1};	Serine/threonine protein phosphatase	GO:0046872,metal ion binding; GO:0004722,protein serine/threonine phosphatase activity	Protein phosphatase 2C
SMEL_003g184030.1	47.99	57.81	31.35	19.01	18.14	20.25	1015	1359	650	375	402	396	0.466	-1.102	5.1767e-07	1.4819e-05	down	SMEL3Ch03	79472593	79476795	-	SMEL_003g184030.1.01	--	K03539 ribonuclease P/MRP protein subunit RPP1 [EC:3.1.26.5] | (RefSeq) uncharacterized LOC105046161 (A)	PREDICTED: zinc finger protein CONSTANS-LIKE 9-like isoform X1 [Nicotiana tomentosiformis]	RecName: Full=Zinc finger protein CO3 {ECO:0000305}; AltName: Full=Protein CONSTANS-like CO3; Short=OsCO3 {ECO:0000303|PubMed:18449564};	SubName: Full=zinc finger protein CONSTANS-LIKE 9-like {ECO:0000313|RefSeq:XP_016512541.1};	--	GO:0005634,nucleus; GO:0003677,DNA binding; GO:0008270,zinc ion binding; GO:0009908,flower development; GO:0048577,negative regulation of short-day photoperiodism, flowering; GO:0009909,regulation of flower development; GO:0006355,regulation of transcription, DNA-templated; GO:0006351,transcription, DNA-templated	CCT motif
SMEL_003g184110.1	5.07	5.2	3.18	1.72	1.08	0.97	259	295	159	82	58	46	0.31	-1.688	4.1835e-09	2.17743e-07	down	SMEL3Ch03	79706439	79719406	-	SMEL_003g184110.1.01	--	K08770 ubiquitin C | (RefSeq) phosphatidylinositol 4-kinase gamma 3-like (A)	Phosphatidylinositol 4-kinase gamma 2 [Capsicum chinense]	RecName: Full=Phosphatidylinositol 4-kinase gamma 3; Short=AtPI4Kgamma3; Short=PI-4Kgamma3; Short=PI4K gamma 3; EC=2.7.1.67;	SubName: Full=Phosphatidylinositol 4-kinase gamma 2 {ECO:0000313|EMBL:PHU23310.1};	Phosphatidylinositol 4-kinase	GO:0005634,nucleus; GO:0005777,peroxisome; GO:0004430,1-phosphatidylinositol 4-kinase activity; GO:0005524,ATP binding; GO:0016301,kinase activity; GO:0035091,phosphatidylinositol binding; GO:0009909,regulation of flower development; GO:0009737,response to abscisic acid; GO:1902074,response to salt	Phosphatidylinositol 3- and 4-kinase
SMEL_003g184130.1	35.41	37.45	34.45	12.54	10.09	12.58	536	630	511	177	160	176	0.361	-1.47	9.09713e-19	2.5685e-16	down	SMEL3Ch03	79736685	79739391	-	SMEL_003g184130.1.01	--	K06268 serine/threonine-protein phosphatase 2B regulatory subunit | (RefSeq) cbl, SlSOS3; calcium sensor calcineurin B-like (A)	Calcineurin B-like protein 4 [Capsicum baccatum]	RecName: Full=Calcineurin B-like protein 7;	SubName: Full=Calcineurin B-like protein 4 {ECO:0000313|EMBL:PHT53355.1};	Ca2+/calmodulin-dependent protein phosphatase (calcineurin subunit B), EF-Hand superfamily protein	GO:0005886,plasma membrane; GO:0005509,calcium ion binding	EF hand
SMEL_003g184660.1	7.92	7.73	13.25	32.93	25.34	31.87	461	500	756	1788	1545	1715	3.386	1.759	2.96225e-10	1.98876e-08	up	SMEL3Ch03	80355647	80361580	-	SMEL_003g184660.1.01	--	K08332 vacuolar protein 8 | (RefSeq) U-box domain-containing protein 44-like (A)	PREDICTED: U-box domain-containing protein 43-like [Solanum tuberosum]	RecName: Full=U-box domain-containing protein 43; EC=2.3.2.27; AltName: Full=Plant U-box protein 43; AltName: Full=RING-type E3 ubiquitin transferase PUB43 {ECO:0000305};	RecName: Full=RING-type E3 ubiquitin transferase {ECO:0000256|SAAS:SAAS00702733}; EC=2.3.2.27 {ECO:0000256|SAAS:SAAS00702733};	FOG: Armadillo/beta-catenin-like repeats	GO:0005886,plasma membrane; GO:0004842,ubiquitin-protein transferase activity	Armadillo/beta-catenin-like repeat
SMEL_003g185080.1	20.5	15.98	17.84	43.02	57.88	37.21	516	447	440	1010	1526	866	2.8	1.485	6.6445e-12	6.22499e-10	up	SMEL3Ch03	80909332	80910879	-	SMEL_003g185080.1.01	--	K07408 cytochrome P450 family 1 subfamily A polypeptide 1 [EC:1.14.14.1] | (RefSeq) cytochrome P450 89A2-like (A)	PREDICTED: LOW QUALITY PROTEIN: cytochrome P450 89A2-like [Solanum tuberosum]	RecName: Full=Cytochrome P450 89A2; EC=1.14.-.-; AltName: Full=ATH 6-1; AltName: Full=CYPLXXXIX;	SubName: Full=Putative cytochrome P450 89A2-like {ECO:0000313|EMBL:JAP31959.1};	Cytochrome P450 CYP2 subfamily	GO:0016021,integral component of membrane; GO:0016020,membrane; GO:0020037,heme binding; GO:0005506,iron ion binding; GO:0016709,oxidoreductase activity, acting on paired donors, with incorporation or reduction of molecular oxygen, NAD(P)H as one donor, and incorporation of one atom of oxygen; GO:0044550,secondary metabolite biosynthetic process	Cytochrome P450
SMEL_003g185340.1	27.28	46.28	7.27	8.75	5.47	11.46	157	296	41	47	33	61	0.359	-1.477	0.00855041	0.0433482	down	SMEL3Ch03	81189004	81189357	+	SMEL_003g185340.1.01	--	--	PREDICTED: uncharacterized protein LOC102598720 [Solanum tuberosum]	RecName: Full=Protein RESPONSE TO LOW SULFUR 4 {ECO:0000303|PubMed:25628631};	SubName: Full=Uncharacterized protein {ECO:0000313|EnsemblPlants:PGSC0003DMT400001474};	--	GO:0009909,regulation of flower development; GO:0048587,regulation of short-day photoperiodism, flowering	--
SMEL_003g185360.1	8.89	4.41	2.41	1.56	1.56	1.57	49	27	13	8	9	8	0.334	-1.582	0.00982435	0.0479461	down	SMEL3Ch03	81201791	81202129	+	SMEL_003g185360.1.01	--	--	PREDICTED: uncharacterized protein LOC107013710 [Solanum pennellii]	RecName: Full=Protein RESPONSE TO LOW SULFUR 3 {ECO:0000303|PubMed:25628631};	SubName: Full=Uncharacterized protein {ECO:0000313|EnsemblPlants:PGSC0003DMT400001476};	--	--	Cytosolic domain of 10TM putative phosphate transporter
SMEL_003g185430.1	3.93	2.85	3.43	1.49	1.93	1.1	62	50	53	22	32	16	0.491	-1.027	0.00544789	0.0309808	down	SMEL3Ch03	81244624	81245667	+	SMEL_003g185430.1.01	--	K22736 vacuolar iron transporter family protein | (RefSeq) vacuolar iron transporter homolog 3-like (A)	PREDICTED: uncharacterized protein LOC102603843 [Solanum tuberosum]	--	SubName: Full=Uncharacterized protein {ECO:0000313|EnsemblPlants:PGSC0003DMT400001485};	--	GO:0016021,integral component of membrane	Protein of unknown function, DUF599
SMEL_003g185490.1	5.11	2.96	3.27	13.2	12.78	7.06	166	107	104	400	435	212	3.208	1.681	4.55175e-08	1.76346e-06	up	SMEL3Ch03	81302802	81304799	-	SMEL_003g185490.1.01	--	K04733 interleukin-1 receptor-associated kinase 4 [EC:2.7.11.1] | (RefSeq) L-type lectin-domain containing receptor kinase VIII.1-like (A)	PREDICTED: L-type lectin-domain containing receptor kinase VIII.1-like [Solanum tuberosum]	RecName: Full=L-type lectin-domain containing receptor kinase VIII.2 {ECO:0000303|PubMed:19773388}; Short=LecRK-VIII.2 {ECO:0000303|PubMed:19773388}; EC=2.7.11.1 {ECO:0000255|PROSITE-ProRule:PRU00159}; Flags: Precursor;	SubName: Full=Uncharacterized protein {ECO:0000313|EnsemblPlants:PGSC0003DMT400001565};	--	GO:0016021,integral component of membrane; GO:0005886,plasma membrane; GO:0005524,ATP binding; GO:0030246,carbohydrate binding; GO:0004674,protein serine/threonine kinase activity; GO:0002229,defense response to oomycetes	Legume lectin domain
SMEL_003g185510.1	14.31	14.86	27.82	35.26	72.23	70.02	486	561	926	1117	2570	2199	3.397	1.764	3.12705e-06	7.1375e-05	up	SMEL3Ch03	81350969	81355637	+	SMEL_003g185510.1.01	--	K18729 protein angel | (RefSeq) uncharacterized calcium-binding protein At1g02270-like (A)	PREDICTED: uncharacterized calcium-binding protein At1g02270 isoform X2 [Solanum lycopersicum]	RecName: Full=Uncharacterized calcium-binding protein At1g02270;	SubName: Full=Putative calcium-binding endonuclease/exonuclease/phosphatase family-like {ECO:0000313|EMBL:JAP32773.1};	Transcriptional effector CCR4-related protein	GO:0016021,integral component of membrane; GO:0005634,nucleus; GO:0005509,calcium ion binding; GO:0009409,response to cold	Endonuclease/Exonuclease/phosphatase family
SMEL_003g185560.1	130.25	105.63	143.56	166.36	344.98	246.08	324	292	350	386	899	566	2.199	1.137	0.000188057	0.00216556	up	SMEL3Ch03	81424508	81424660	+	SMEL_003g185560.1.01	--	--	--	--	SubName: Full=Uncharacterized protein {ECO:0000313|EnsemblPlants:PGSC0003DMT400001592};	--	--	--
SMEL_003g185630.1	37.64	35.21	78.23	258.08	360	340.1	809	841	1648	5174	8106	6759	6.867	2.78	2.58847e-15	4.33748e-13	up	SMEL3Ch03	81466191	81471255	-	SMEL_003g185630.1.01	--	K00475 naringenin 3-dioxygenase [EC:1.14.11.9] | (RefSeq) naringenin,2-oxoglutarate 3-dioxygenase (A)	hypothetical protein T459_09714 [Capsicum annuum]	RecName: Full=Protein DOWNY MILDEW RESISTANCE 6 {ECO:0000303|PubMed:15986928}; Short=AtDMR6 {ECO:0000303|PubMed:15986928}; EC=1.14.11.- {ECO:0000255|PROSITE-ProRule:PRU00805}; AltName: Full=2-oxoglutarate (2OG)-Fe(II) oxygenase-like protein DMR6 {ECO:0000303|PubMed:18248595}; AltName: Full=Salicylate 3-hydroxylase DMR6 {ECO:0000305}; Short=S3H DMR6 {ECO:0000305}; Short=SA 3-hydroxylase DMR6 {ECO:…	SubName: Full=Uncharacterized protein {ECO:0000313|EMBL:PHT87608.1};	Iron/ascorbate family oxidoreductases	GO:0033759,flavone synthase activity; GO:0046872,metal ion binding; GO:0034785,salicylate 5-hydroxylase activity; GO:0042742,defense response to bacterium; GO:0002229,defense response to oomycetes; GO:0009813,flavonoid biosynthetic process; GO:0010150,leaf senescence; GO:0009617,response to bacterium; GO:0009620,response to fungus; GO:0002239,response to oomycetes; GO:0009751,response to salicyli…	2OG-Fe(II) oxygenase superfamily
SMEL_003g185810.1	80.58	213.08	57.1	8.33	7.15	3.6	1162	3415	807	112	108	48	0.061	-4.046	8.88981e-19	2.54483e-16	down	SMEL3Ch03	81643004	81644217	-	SMEL_003g185810.1.01	--	K13993 HSP20 family protein | (RefSeq) small heat shock protein, chloroplastic (A)	PREDICTED: small heat shock protein, chloroplastic [Solanum tuberosum]	RecName: Full=Small heat shock protein, chloroplastic; Flags: Precursor;	SubName: Full=Uncharacterized protein {ECO:0000313|EnsemblPlants:PGSC0003DMT400008351};	Molecular chaperone (small heat-shock protein Hsp26/Hsp42)	GO:0009507,chloroplast	Hsp20/alpha crystallin family
SMEL_003g185880.1	28.41	26.76	46.9	70.25	67.55	69.05	1031	1079	1668	2378	2568	2317	2.201	1.138	2.31569e-05	0.00039026	up	SMEL3Ch03	81740605	81749584	+	SMEL_003g185880.1.01	--	K13412 calcium-dependent protein kinase [EC:2.7.11.1] | (RefSeq) CDPK-related kinase 4-like (A)	serine/threonine protein kinase pk23 [Solanum lycopersicum]	RecName: Full=CDPK-related kinase 4; Short=AtCRK4; EC=2.7.11.1; AltName: Full=Calcium/calmodulin-dependent protein kinase CRK4;	SubName: Full=Serine/threonine protein kinase pk23 {ECO:0000313|EMBL:AAL87457.1, ECO:0000313|EnsemblPlants:Solyc03g082500.2.1};	Ca2+/calmodulin-dependent protein kinase, EF-Hand protein superfamily	GO:0005737,cytoplasm; GO:0005634,nucleus; GO:0005886,plasma membrane; GO:0009506,plasmodesma; GO:0005524,ATP binding; GO:0009931,calcium-dependent protein serine/threonine kinase activity; GO:0005516,calmodulin binding; GO:0004683,calmodulin-dependent protein kinase activity; GO:0046872,metal ion binding; GO:0004674,protein serine/threonine kinase activity; GO:0009738,abscisic acid-activated sign…	Protein kinase domain
SMEL_003g185920.1	77.45	84.55	26.92	25.51	32.45	18.03	957	1161	326	294	420	206	0.451	-1.149	0.0027144	0.017995	down	SMEL3Ch03	81813503	81814355	+	SMEL_003g185920.1.01	--	K09338 homeobox-leucine zipper protein | (RefSeq) HD-ZIP; homeobox-leucine zipper protein ATHB-12-like (A)	PREDICTED: homeobox-leucine zipper protein ATHB-7-like [Solanum tuberosum]	RecName: Full=Homeobox-leucine zipper protein ATHB-7; AltName: Full=HD-ZIP protein ATHB-7; AltName: Full=Homeodomain transcription factor ATHB-7;	SubName: Full=Uncharacterized protein {ECO:0000313|EnsemblPlants:PGSC0003DMT400047622};	Transcription factor HEX, contains HOX and HALZ domains	GO:0005634,nucleus; GO:0003700,DNA-binding transcription factor activity; GO:0043565,sequence-specific DNA binding; GO:0045893,positive regulation of transcription, DNA-templated; GO:0009737,response to abscisic acid; GO:0009414,response to water deprivation; GO:0006351,transcription, DNA-templated	Homeobox domain
SMEL_003g186020.1	11.8	12.65	7.67	27.98	22.92	22.53	413	492	263	913	840	729	2.532	1.34	8.39171e-12	7.61945e-10	up	SMEL3Ch03	81944483	81947387	-	SMEL_003g186020.1.01	--	K15400 omega-hydroxypalmitate O-feruloyl transferase [EC:2.3.1.188] | (RefSeq) omega-hydroxypalmitate O-feruloyl transferase-like (A)	PREDICTED: omega-hydroxypalmitate O-feruloyl transferase-like [Solanum pennellii]	RecName: Full=Omega-hydroxypalmitate O-feruloyl transferase; EC=2.3.1.188; AltName: Full=Omega-hydroxyacid hydroxycinnamoyltransferase; AltName: Full=Protein ALIPHATIC SUBERIN FERULOYL TRANSFERASE;	SubName: Full=Feruloyl transferase {ECO:0000313|EMBL:ACS70946.1}; EC=2.3.1.110 {ECO:0000313|EMBL:ACS70946.1};	--	GO:0050734,hydroxycinnamoyltransferase activity; GO:0102406,omega-hydroxypalmitate O-sinapoyl transferase activity; GO:0052325,cell wall pectin biosynthetic process; GO:0010345,suberin biosynthetic process	Transferase family
SMEL_003g186230.1	16.17	21.83	5.3	24.77	31.7	28.42	56	84	18	80	115	91	2.2	1.138	0.00910917	0.0454405	up	SMEL3Ch03	82208884	82209096	+	SMEL_003g186230.1.01	--	--	hypothetical protein BC332_08719 [Capsicum chinense]	--	SubName: Full=Uncharacterized protein {ECO:0000313|EnsemblPlants:PGSC0003DMT400081213};	--	--	--
SMEL_003g186310.1	23.96	28.68	60.24	104.54	128.7	197.21	418	556	1030	1701	2352	3181	4.137	2.049	4.02602e-07	1.18543e-05	up	SMEL3Ch03	82405513	82407042	-	SMEL_003g186310.1.01	--	K15382 solute carrier family 50 (sugar transporter) | (RefSeq) bidirectional sugar transporter N3-like (A)	PREDICTED: bidirectional sugar transporter N3-like [Solanum pennellii]	RecName: Full=Bidirectional sugar transporter SWEET11 {ECO:0000303|PubMed:21107422}; Short=AtSWEET11 {ECO:0000303|PubMed:21107422}; AltName: Full=Protein SUGARS WILL EVENTUALLY BE EXPORTED TRANSPORTERS 11 {ECO:0000303|PubMed:21107422};	RecName: Full=Bidirectional sugar transporter SWEET {ECO:0000256|RuleBase:RU910715};	Multitransmembrane protein	GO:0016021,integral component of membrane; GO:0005887,integral component of plasma membrane; GO:0005886,plasma membrane; GO:0008515,sucrose transmembrane transporter activity; GO:0051119,sugar transmembrane transporter activity; GO:0009793,embryo development ending in seed dormancy; GO:0051260,protein homooligomerization; GO:0010431,seed maturation; GO:0015770,sucrose transport	Sugar efflux transporter for intercellular exchange
SMEL_003g186330.1	2.74	2.18	3.27	3.49	5.72	8.6	53	47	62	63	116	154	2.405	1.266	0.00164607	0.0122084	up	SMEL3Ch03	82426066	82429467	-	SMEL_003g186330.1.01	--	K15382 solute carrier family 50 (sugar transporter) | (RefSeq) bidirectional sugar transporter N3-like (A)	PREDICTED: bidirectional sugar transporter N3-like [Solanum pennellii]	RecName: Full=Bidirectional sugar transporter SWEET11 {ECO:0000303|PubMed:21107422}; Short=AtSWEET11 {ECO:0000303|PubMed:21107422}; AltName: Full=Protein SUGARS WILL EVENTUALLY BE EXPORTED TRANSPORTERS 11 {ECO:0000303|PubMed:21107422};	RecName: Full=Bidirectional sugar transporter SWEET {ECO:0000256|RuleBase:RU910715};	Multitransmembrane protein	GO:0016021,integral component of membrane; GO:0005887,integral component of plasma membrane; GO:0005886,plasma membrane; GO:0008515,sucrose transmembrane transporter activity; GO:0051119,sugar transmembrane transporter activity; GO:0009793,embryo development ending in seed dormancy; GO:0051260,protein homooligomerization; GO:0010431,seed maturation; GO:0015770,sucrose transport	Sugar efflux transporter for intercellular exchange
SMEL_003g186370.1	5.3	8.95	3.11	1.15	1.17	1.45	99	186	57	20	23	25	0.242	-2.044	1.63299e-06	4.02121e-05	down	SMEL3Ch03	82504275	82506021	-	SMEL_003g186370.1.01	--	K15382 solute carrier family 50 (sugar transporter) | (RefSeq) bidirectional sugar transporter SWEET12-like (A)	PREDICTED: bidirectional sugar transporter SWEET12-like [Capsicum annuum]	RecName: Full=Bidirectional sugar transporter SWEET11 {ECO:0000303|PubMed:21107422}; Short=AtSWEET11 {ECO:0000303|PubMed:21107422}; AltName: Full=Protein SUGARS WILL EVENTUALLY BE EXPORTED TRANSPORTERS 11 {ECO:0000303|PubMed:21107422};	RecName: Full=Bidirectional sugar transporter SWEET {ECO:0000256|RuleBase:RU910715};	Multitransmembrane protein	GO:0016021,integral component of membrane; GO:0005887,integral component of plasma membrane; GO:0005886,plasma membrane; GO:0008515,sucrose transmembrane transporter activity; GO:0051119,sugar transmembrane transporter activity; GO:0009793,embryo development ending in seed dormancy; GO:0051260,protein homooligomerization; GO:0010431,seed maturation; GO:0015770,sucrose transport	Sugar efflux transporter for intercellular exchange
SMEL_003g186430.1	6.51	8.58	5.48	3.49	2.74	1.88	86	126	71	43	38	23	0.435	-1.202	0.000208442	0.00235022	down	SMEL3Ch03	82589916	82591470	+	SMEL_003g186430.1.01	--	K00521 ferric-chelate reductase [EC:1.16.1.7] | (RefSeq) ferric reduction oxidase 7, chloroplastic-like (A)	PREDICTED: NAC domain-containing protein 83-like [Solanum tuberosum]	RecName: Full=NAC domain-containing protein 83 {ECO:0000303|PubMed:15029955}; Short=ANAC083 {ECO:0000303|PubMed:15029955}; AltName: Full=Protein VND-INTERACTING 2 {ECO:0000303|PubMed:20388856};	SubName: Full=Uncharacterized protein {ECO:0000313|EnsemblPlants:PGSC0003DMT400011069};	--	GO:0005634,nucleus; GO:0003677,DNA binding; GO:0003700,DNA-binding transcription factor activity; GO:0010150,leaf senescence; GO:0045892,negative regulation of transcription, DNA-templated; GO:0009737,response to abscisic acid; GO:0009651,response to salt stress; GO:0006351,transcription, DNA-templated; GO:0016032,viral process; GO:0010089,xylem development	No apical meristem (NAM) protein
SMEL_003g186570.1	25.22	24.4	21.02	10.56	8.03	8.27	333	358	272	130	111	101	0.418	-1.257	5.86626e-12	5.59766e-10	down	SMEL3Ch03	82754605	82758952	+	SMEL_003g186570.1.01	--	--	PREDICTED: CASP-like protein 1F1 [Solanum pennellii]	RecName: Full=CASP-like protein 1F1; Short=VvCASPL1F1;	RecName: Full=CASP-like protein {ECO:0000256|RuleBase:RU361233};	--	GO:0016021,integral component of membrane; GO:0005886,plasma membrane; GO:0051536,iron-sulfur cluster binding	Domain of unknown function (DUF588)
SMEL_003g186840.1	13.87	16.87	12.66	5.69	2.35	4.29	350	473	313	134	62	100	0.312	-1.681	4.02224e-08	1.58817e-06	down	SMEL3Ch03	83072355	83074980	+	SMEL_003g186840.1.01	--	K01099 inositol polyphosphate 5-phosphatase INPP5B/F [EC:3.1.3.36] | (RefSeq) type IV inositol polyphosphate 5-phosphatase 9-like (A)	PREDICTED: type IV inositol polyphosphate 5-phosphatase 9-like isoform X2 [Solanum tuberosum]	RecName: Full=Type IV inositol polyphosphate 5-phosphatase 9 {ECO:0000303|PubMed:23658066}; Short=At5PTase9 {ECO:0000303|PubMed:23658066}; EC=3.1.3.36 {ECO:0000269|PubMed:23658066}; EC=3.1.3.86 {ECO:0000269|PubMed:23658066};	SubName: Full=Uncharacterized protein {ECO:0000313|EnsemblPlants:Solyc03g098030.2.1};	Inositol polyphosphate 5-phosphatase and related proteins	GO:0034595,phosphatidylinositol phosphate 5-phosphatase activity; GO:0034485,phosphatidylinositol-3,4,5-trisphosphate 5-phosphatase activity; GO:0004439,phosphatidylinositol-4,5-bisphosphate 5-phosphatase activity; GO:0071472,cellular response to salt stress; GO:0046856,phosphatidylinositol dephosphorylation; GO:2000369,regulation of clathrin-dependent endocytosis; GO:2000377,regulation of reacti…	Endonuclease/Exonuclease/phosphatase family
SMEL_003g186880.1	2.15	0.78	0.09	0.09	0.08	0	25	10	1	1	1	0	0.066	-3.919	0.00943243	0.0466327	down	SMEL3Ch03	83132831	83135351	-	SMEL_003g186880.1.01	--	--	PREDICTED: CASP-like protein 4D1 [Solanum pennellii]	RecName: Full=CASP-like protein 4D1; Short=RcCASPL4D1;	RecName: Full=CASP-like protein {ECO:0000256|RuleBase:RU361233};	--	GO:0016021,integral component of membrane; GO:0005886,plasma membrane	Domain of unknown function (DUF588)
SMEL_003g187430.1	7.7	6.39	13.57	12.76	18.81	19.25	77	71	133	119	197	178	2.004	1.003	0.00699897	0.0373526	up	SMEL3Ch03	83754192	83754806	-	SMEL_003g187430.1.01	--	--	hypothetical protein BC332_09750 [Capsicum chinense]	RecName: Full=Kunitz trypsin inhibitor 2 {ECO:0000305}; Short=AtKTI2 {ECO:0000305}; Flags: Precursor;	SubName: Full=Uncharacterized protein {ECO:0000313|EMBL:PHU24643.1};	--	GO:0048046,apoplast; GO:0005618,cell wall; GO:0004866,endopeptidase inhibitor activity	Trypsin and protease inhibitor
SMEL_003g187710.1	8.09	8.81	9.33	36.2	36.29	60.49	428	518	484	1787	2012	2960	5.6	2.486	1.35855e-21	6.22247e-19	up	SMEL3Ch03	84127418	84137728	-	SMEL_003g187710.1.01	--	K12309 beta-galactosidase [EC:3.2.1.23] | (RefSeq) BGAL2; beta-galactosidase 2 (A)	PREDICTED: beta-galactosidase 10 [Solanum tuberosum]	RecName: Full=Beta-galactosidase 3; Short=Lactase 3; EC=3.2.1.23; Flags: Precursor;	RecName: Full=Beta-galactosidase {ECO:0000256|RuleBase:RU000675}; EC=3.2.1.23 {ECO:0000256|RuleBase:RU000675};	Beta-galactosidase	GO:0048046,apoplast; GO:0005618,cell wall; GO:0005773,vacuole; GO:0004565,beta-galactosidase activity; GO:0030246,carbohydrate binding; GO:0005975,carbohydrate metabolic process	Glycosyl hydrolases family 35
SMEL_003g187810.1	97.37	106.16	77.8	45.73	34.41	34.68	2107	2553	1650	923	780	694	0.45	-1.151	2.1622e-12	2.21717e-10	down	SMEL3Ch03	84204983	84212423	+	SMEL_003g187810.1.01	--	K07407 alpha-galactosidase [EC:3.2.1.22] | (RefSeq) alpha-galactosidase-like (A)	PREDICTED: alpha-galactosidase-like [Solanum pennellii]	RecName: Full=Alpha-galactosidase; EC=3.2.1.22; AltName: Full=Alpha-D-galactoside galactohydrolase; AltName: Full=Melibiase; Flags: Precursor;	RecName: Full=Alpha-galactosidase {ECO:0000256|RuleBase:RU361168}; EC=3.2.1.22 {ECO:0000256|RuleBase:RU361168}; AltName: Full=Melibiase {ECO:0000256|RuleBase:RU361168};	Alpha-D-galactosidase (melibiase)	GO:0052692,raffinose alpha-galactosidase activity; GO:0005975,carbohydrate metabolic process	Alpha galactosidase A
SMEL_003g187890.1	1.87	4.16	2.66	0.63	0.42	0.48	38	94	53	12	9	9	0.193	-2.37	9.04507e-07	2.41175e-05	down	SMEL3Ch03	84256415	84257916	+	SMEL_003g187890.1.01	--	K13379 reversibly glycosylated polypeptide / UDP-arabinopyranose mutase [EC:2.4.1.- 5.4.99.30] | (RefSeq) alpha-1,4-glucan-protein synthase [UDP-forming]-like (A)	PREDICTED: alpha-1,4-glucan-protein synthase [UDP-forming]	RecName: Full=Probable UDP-arabinopyranose mutase 1 {ECO:0000305}; EC=5.4.99.30 {ECO:0000250|UniProtKB:Q8H8T0}; AltName: Full=Reversibly glycosylated polypeptide 1 {ECO:0000303|PubMed:9207152}; Short=RGP1 {ECO:0000303|PubMed:9207152}; AltName: Full=UDP-L-arabinose mutase 1 {ECO:0000305}; AltName: Full=UDP-glucose:protein transglucosylase {ECO:0000305}; Short=UPTG {ECO:0000305};	SubName: Full=Uncharacterized protein {ECO:0000313|EnsemblPlants:PGSC0003DMT400039494};	--	GO:0005618,cell wall; GO:0005576,extracellular region; GO:0005794,Golgi apparatus; GO:0009506,plasmodesma; GO:0052691,UDP-arabinopyranose mutase activity; GO:0071555,cell wall organization; GO:0030244,cellulose biosynthetic process; GO:0071669,plant-type cell wall organization or biogenesis; GO:0006486,protein glycosylation	Reversibly glycosylated polypeptide
SMEL_003g187970.1	2.77	2.24	13.47	0.99	0.44	0.6	30	27	143	10	5	6	0.115	-3.119	6.88036e-05	0.000953672	down	SMEL3Ch03	84318487	84319152	+	SMEL_003g187970.1.01	--	--	Serine protease inhibitor 1 [Capsicum annuum]	RecName: Full=Serine protease inhibitor 5; AltName: Full=gCDI-B1; Flags: Precursor;	SubName: Full=Serine protease inhibitor 1 {ECO:0000313|EMBL:PHT61811.1};	--	GO:0005773,vacuole; GO:0004867,serine-type endopeptidase inhibitor activity	Trypsin and protease inhibitor
SMEL_003g188140.1	1.36	2.2	0.36	0.21	0.19	0.17	35	63	9	5	5	4	0.161	-2.635	0.000401497	0.00395946	down	SMEL3Ch03	84518112	84519695	+	SMEL_003g188140.1.01	--	K14494 DELLA protein | (RefSeq) DELLA protein RGL1-like (A)	PREDICTED: DELLA protein RGL1-like [Solanum pennellii]	RecName: Full=DELLA protein GAI1; AltName: Full=Gibberellic acid-insensitive mutant protein 1; AltName: Full=VvGAI1;	SubName: Full=Uncharacterized protein {ECO:0000313|EnsemblPlants:PGSC0003DMT400039455};	--	GO:0005634,nucleus; GO:0000989,NA; GO:0009740,gibberellic acid mediated signaling pathway; GO:0006355,regulation of transcription, DNA-templated; GO:0006351,transcription, DNA-templated	GRAS domain family
SMEL_003g188230.1	58.07	60.6	32.64	82.7	149.51	93.89	895	1038	493	1189	2414	1338	2.408	1.268	1.61805e-05	0.000290501	up	SMEL3Ch03	84614058	84615005	-	SMEL_003g188230.1.01	--	--	PREDICTED: uncharacterized protein LOC102590433 [Solanum tuberosum]	--	SubName: Full=Uncharacterized protein {ECO:0000313|EnsemblPlants:PGSC0003DMT400039289};	--	--	--
SMEL_003g188400.1	1.55	1.43	8.48	26.81	58.79	77.14	39	40	209	629	1549	1794	15.141	3.92	4.0022e-05	0.000612848	up	SMEL3Ch03	84773738	84775284	-	SMEL_003g188400.1.01	--	K20665 jasmonoyl-L-amino acid 12-hydroxylase [EC:1.14.14.48] | (RefSeq) cytochrome P450 94B3-like (A)	PREDICTED: cytochrome P450 94B3-like [Solanum pennellii]	RecName: Full=Cytochrome P450 94B3 {ECO:0000305}; EC=1.14.14.48 {ECO:0000269|PubMed:21576464, ECO:0000269|PubMed:22215670}; AltName: Full=Jasmonoyl-L-amino acid 12-hydroxylase {ECO:0000303|PubMed:24467969}; AltName: Full=Jasmonoyl-isoleucine-12-hydroxylase {ECO:0000303|PubMed:21849397};	SubName: Full=Uncharacterized protein {ECO:0000313|EnsemblPlants:PGSC0003DMT400039412};	Cytochrome P450 CYP4/CYP19/CYP26 subfamilies	GO:0005789,endoplasmic reticulum membrane; GO:0016021,integral component of membrane; GO:0020037,heme binding; GO:0005506,iron ion binding; GO:0052694,jasmonoyl-isoleucine-12-hydroxylase activity; GO:0016705,oxidoreductase activity, acting on paired donors, with incorporation or reduction of molecular oxygen; GO:0048653,anther development; GO:0002213,defense response to insect; GO:0010154,fruit d…	Cytochrome P450
SMEL_003g188410.1	20.05	20.04	103.84	177.52	277.92	305.04	487	541	2472	4022	7072	6851	5.611	2.488	0.00375736	0.0232004	up	SMEL3Ch03	84785731	84787224	+	SMEL_003g188410.1.01	--	K20665 jasmonoyl-L-amino acid 12-hydroxylase [EC:1.14.14.48] | (RefSeq) cytochrome P450 94B3-like (A)	Cytochrome 94B1 [Capsicum chinense]	RecName: Full=Cytochrome P450 94B3 {ECO:0000305}; EC=1.14.14.48 {ECO:0000269|PubMed:21576464, ECO:0000269|PubMed:22215670}; AltName: Full=Jasmonoyl-L-amino acid 12-hydroxylase {ECO:0000303|PubMed:24467969}; AltName: Full=Jasmonoyl-isoleucine-12-hydroxylase {ECO:0000303|PubMed:21849397};	SubName: Full=Cytochrome 94B1 {ECO:0000313|EMBL:PHU16576.1};	Cytochrome P450 CYP4/CYP19/CYP26 subfamilies	GO:0005789,endoplasmic reticulum membrane; GO:0016021,integral component of membrane; GO:0020037,heme binding; GO:0005506,iron ion binding; GO:0052694,jasmonoyl-isoleucine-12-hydroxylase activity; GO:0016705,oxidoreductase activity, acting on paired donors, with incorporation or reduction of molecular oxygen; GO:0048653,anther development; GO:0002213,defense response to insect; GO:0010154,fruit d…	Cytochrome P450
SMEL_003g188480.1	0.04	0.14	0	0.57	0.29	0.29	1	4	0	14	8	7	7.061	2.82	0.00724672	0.0382867	up	SMEL3Ch03	84845039	84847216	-	SMEL_003g188480.1.01	--	K05391 cyclic nucleotide gated channel, plant | (RefSeq) putative cyclic nucleotide-gated ion channel 15 (A)	PREDICTED: uncharacterized protein LOC107871990 [Capsicum annuum]	--	SubName: Full=Putative ovule protein {ECO:0000313|EMBL:JAP30552.1};	--	--	Domain of unknown function (DUF4283)
SMEL_003g189040.1	23.77	18.78	12.66	10.71	3.94	7.12	657	577	343	276	114	182	0.435	-1.199	0.000680551	0.0060201	down	SMEL3Ch03	85535091	85537114	+	SMEL_003g189040.1.01	--	K01728 pectate lyase [EC:4.2.2.2] | (RefSeq) probable pectate lyase 18 (A)	PREDICTED: probable pectate lyase 18 [Nicotiana tomentosiformis]	RecName: Full=Probable pectate lyase 18; EC=4.2.2.2; AltName: Full=Pectate lyase A10; Flags: Precursor;	RecName: Full=Pectate lyase {ECO:0000256|RuleBase:RU361123}; EC=4.2.2.2 {ECO:0000256|RuleBase:RU361123};	--	GO:0016020,membrane; GO:0046872,metal ion binding; GO:0030570,pectate lyase activity; GO:0045490,pectin catabolic process; GO:0009624,response to nematode	Pectate lyase
SMEL_003g189260.1	0.43	0.2	0.57	0.96	1.09	1.27	14	7	18	29	37	38	3.066	1.616	0.00124329	0.00978445	up	SMEL3Ch03	85752427	85755995	-	SMEL_003g189260.1.01	--	K07408 cytochrome P450 family 1 subfamily A polypeptide 1 [EC:1.14.14.1] | (RefSeq) cytochrome P450 71A3-like (A)	PREDICTED: cytochrome P450 71A3-like [Solanum lycopersicum]	RecName: Full=Cytochrome P450 71A2; EC=1.14.-.-; AltName: Full=CYPLXXIA2; AltName: Full=Cytochrome P-450EG4;	SubName: Full=Uncharacterized protein {ECO:0000313|EnsemblPlants:Solyc03g111950.2.1};	Cytochrome P450 CYP2 subfamily	GO:0016021,integral component of membrane; GO:0020037,heme binding; GO:0005506,iron ion binding; GO:0004497,monooxygenase activity; GO:0016705,oxidoreductase activity, acting on paired donors, with incorporation or reduction of molecular oxygen	Cytochrome P450
SMEL_003g189470.1	31.49	51.26	26.96	17.11	11.2	10.97	298	539	250	151	111	96	0.395	-1.339	4.33588e-06	9.46683e-05	down	SMEL3Ch03	85918894	85919475	-	SMEL_003g189470.1.01	--	--	hypothetical protein A4A49_06396 [Nicotiana attenuata]	--	SubName: Full=Uncharacterized protein {ECO:0000313|EnsemblPlants:PGSC0003DMT400046673};	--	--	--
SMEL_003g189560.1	0.57	0.58	1.12	3.41	5.18	2.35	31	35	60	174	297	119	5.259	2.395	5.75252e-09	2.82972e-07	up	SMEL3Ch03	85961851	85976391	-	SMEL_003g189560.1.01	--	K05841 sterol 3beta-glucosyltransferase [EC:2.4.1.173] | (RefSeq) sterol 3-beta-glucosyltransferase-like (A)	PREDICTED: C2 and GRAM domain-containing protein At5g50170 [Solanum tuberosum]	RecName: Full=C2 and GRAM domain-containing protein At5g50170;	SubName: Full=Uncharacterized protein {ECO:0000313|EnsemblPlants:Solyc03g112280.2.1};	Uncharacterized conserved protein, contains GRAM domain	GO:0005783,endoplasmic reticulum; GO:0016021,integral component of membrane	Domain of unknown function (DUF4782)
SMEL_003g189940.1	3.87	3.37	2.54	2.01	1.38	0.82	239	231	154	116	89	47	0.474	-1.078	0.000745878	0.00644042	down	SMEL3Ch03	86297657	86302447	-	SMEL_003g189940.1.01	--	K17422 large subunit ribosomal protein L41 | (RefSeq) LRR receptor-like kinase family protein (A)	PREDICTED: probable LRR receptor-like serine/threonine-protein kinase At4g26540 [Solanum tuberosum]	RecName: Full=LRR receptor-like serine/threonine-protein kinase {ECO:0000305}; EC=2.7.11.1 {ECO:0000305}; AltName: Full=LRR receptor-like serine/threonine-protein kinase At4g26540 {ECO:0000305}; AltName: Full=Protein RECEPTOR OF RGF1 {ECO:0000303|PubMed:27229311}; AltName: Full=Protein RGF1 INSENSITIVE 3 {ECO:0000303|PubMed:27229312}; Flags: Precursor;	SubName: Full=Uncharacterized protein {ECO:0000313|EnsemblPlants:PGSC0003DMT400046807};	--	GO:0016021,integral component of membrane; GO:0005886,plasma membrane; GO:0005524,ATP binding; GO:0004674,protein serine/threonine kinase activity	Leucine rich repeat
SMEL_003g189980.1	6.01	6.04	10.28	15.16	17.88	16.06	34	38	57	80	106	84	2.407	1.267	0.000164306	0.00194963	up	SMEL3Ch03	86348750	86349097	-	SMEL_003g189980.1.01	--	K12879 THO complex subunit 2 | (RefSeq) THO complex subunit 2-like (A)	PREDICTED: uncharacterized protein LOC104104150 [Nicotiana tomentosiformis]	--	SubName: Full=uncharacterized protein LOC107774363 {ECO:0000313|RefSeq:XP_016449348.1};	--	--	--
SMEL_003g190150.1	14.31	10.35	11.24	4.81	4	3.62	679	546	523	213	199	159	0.381	-1.392	1.3953e-12	1.49784e-10	down	SMEL3Ch03	86671162	86674080	+	SMEL_003g190150.1.01	--	K13420 LRR receptor-like serine/threonine-protein kinase FLS2 [EC:2.7.11.1] | (RefSeq) LRR receptor-like serine/threonine-protein kinase FLS2 (A)	PREDICTED: LRR receptor-like serine/threonine-protein kinase GSO1 [Solanum tuberosum]	RecName: Full=LRR receptor-like serine/threonine-protein kinase GSO1 {ECO:0000303|PubMed:18088309}; EC=2.7.11.1 {ECO:0000255|PROSITE-ProRule:PRU00159}; AltName: Full=Protein GASSHO 1 {ECO:0000303|PubMed:18088309}; AltName: Full=Protein SCHENGEN 3 {ECO:0000303|PubMed:25233277}; Flags: Precursor;	SubName: Full=Uncharacterized protein {ECO:0000313|EnsemblPlants:PGSC0003DMT400046778};	--	GO:0048226,Casparian strip; GO:0016021,integral component of membrane; GO:0005886,plasma membrane; GO:0005524,ATP binding; GO:0004674,protein serine/threonine kinase activity; GO:0071555,cell wall organization; GO:0009793,embryo development ending in seed dormancy; GO:0035987,endodermal cell differentiation; GO:0045184,establishment of protein localization; GO:0090558,plant epidermis development;…	Leucine Rich repeats (2 copies)
SMEL_003g190260.1	5.56	7.43	1.73	1.32	1.03	2.09	72	107	22	16	14	25	0.339	-1.559	0.00507197	0.02934	down	SMEL3Ch03	86747937	86749029	+	SMEL_003g190260.1.01	--	--	PREDICTED: CASP-like protein 4D1 [Solanum tuberosum]	RecName: Full=CASP-like protein 4D1; Short=RcCASPL4D1;	RecName: Full=CASP-like protein {ECO:0000256|RuleBase:RU361233};	--	GO:0016021,integral component of membrane; GO:0005886,plasma membrane	Domain of unknown function (DUF588)
SMEL_003g190470.1	23.61	21.49	54.37	80.39	111.69	110.99	1223	1237	2760	3884	6061	5316	3.29	1.718	7.72759e-06	0.000154634	up	SMEL3Ch03	86991368	87000125	-	SMEL_003g190470.1.01	--	K05643 ATP-binding cassette, subfamily A (ABC1), member 3 | (RefSeq) ABC transporter A family member 8 (A)	PREDICTED: ABC transporter A family member 7-like [Solanum tuberosum]	RecName: Full=ABC transporter A family member 7; Short=ABC transporter ABCA.7; Short=AtABCA7; AltName: Full=Probable ABC2 homolog 6;	SubName: Full=Uncharacterized protein {ECO:0000313|EnsemblPlants:Solyc03g113040.2.1};	Lipid exporter ABCA1 and related proteins, ABC superfamily	GO:0016021,integral component of membrane; GO:0043231,intracellular membrane-bounded organelle; GO:0005886,plasma membrane; GO:0009506,plasmodesma; GO:0005524,ATP binding; GO:0042626,ATPase activity, coupled to transmembrane movement of substances; GO:0005215,transporter activity; GO:0006869,lipid transport	ABC transporter
SMEL_003g190500.1	21.32	17.61	46.18	68.03	84.5	85.12	1235	1134	2622	3676	5128	4559	3.013	1.591	2.20162e-05	0.000375389	up	SMEL3Ch03	87026463	87035489	+	SMEL_003g190500.1.01	--	K05643 ATP-binding cassette, subfamily A (ABC1), member 3 | (RefSeq) ABC-2 type transport system, ATP-binding protein (A)	PREDICTED: ABC transporter A family member 2-like [Capsicum annuum]	RecName: Full=ABC transporter A family member 2; Short=ABC transporter ABCA.2; Short=AtABCA2; AltName: Full=ABC2 homolog 1;	SubName: Full=ABC transporter A family member 2-like {ECO:0000313|RefSeq:XP_016563600.1};	Lipid exporter ABCA1 and related proteins, ABC superfamily	GO:0016021,integral component of membrane; GO:0043231,intracellular membrane-bounded organelle; GO:0005524,ATP binding; GO:0042626,ATPase activity, coupled to transmembrane movement of substances; GO:0005215,transporter activity; GO:0006869,lipid transport	ABC-2 family transporter protein
SMEL_003g190540.1	1.7	2.92	3.39	2.45	14.78	17.23	23	44	45	31	210	216	4.772	2.255	0.000291372	0.00307029	up	SMEL3Ch03	87087035	87091411	-	SMEL_003g190540.1.01	--	K10712 cysteamine dioxygenase [EC:1.13.11.19] | (RefSeq) plant cysteine oxidase 2 (A)	PREDICTED: plant cysteine oxidase 2 isoform X1 [Solanum lycopersicum]	RecName: Full=Plant cysteine oxidase 1 {ECO:0000303|PubMed:24599061}; EC=1.13.11.20; AltName: Full=Hypoxia-responsive unknown protein 29 {ECO:0000303|PubMed:20097791};	SubName: Full=Uncharacterized protein {ECO:0000313|EnsemblPlants:Solyc03g113130.2.1};	Uncharacterized conserved protein	GO:0005829,cytosol; GO:0005634,nucleus; GO:0017172,cysteine dioxygenase activity; GO:0046872,metal ion binding; GO:0009061,anaerobic respiration; GO:0070483,detection of hypoxia; GO:0018171,peptidyl-cysteine oxidation; GO:0001666,response to hypoxia	PCO_ADO
SMEL_003g190650.1	3.45	4.8	2.18	1.14	0.94	0.89	42	65	26	13	12	10	0.316	-1.663	0.000339987	0.00346733	down	SMEL3Ch03	87165149	87166790	+	SMEL_003g190650.1.01	--	--	PREDICTED: uncharacterized protein LOC102582737 [Solanum tuberosum]	--	SubName: Full=Uncharacterized protein {ECO:0000313|EnsemblPlants:PGSC0003DMT400065211};	--	GO:0009535,chloroplast thylakoid membrane; GO:0009515,granal stacked thylakoid; GO:0016021,integral component of membrane; GO:0090391,granum assembly; GO:0010196,nonphotochemical quenching; GO:0010027,thylakoid membrane organization	Protein of unknown function (DUF1118)
SMEL_003g190680.1	8.03	6.37	5	3.16	2.59	1.79	136	120	83	50	46	28	0.43	-1.219	6.40699e-05	0.000905102	down	SMEL3Ch03	87198649	87203236	-	SMEL_003g190680.1.01	--	--	PREDICTED: uncharacterized protein LOC107862494 isoform X2 [Capsicum annuum]	--	SubName: Full=uncharacterized protein LOC107862494 isoform X2 {ECO:0000313|RefSeq:XP_016563581.1};	--	GO:0016021,integral component of membrane	HPP family
SMEL_003g190750.1	20.45	16.09	17.06	28.22	60.54	82.84	630	551	515	811	1954	2360	3.569	1.836	4.138e-07	1.21493e-05	up	SMEL3Ch03	87240680	87242803	+	SMEL_003g190750.1.01	--	K14638 solute carrier family 15 (peptide/histidine transporter), member 3/4 | (RefSeq) protein NRT1/ PTR FAMILY 2.11-like (A)	PREDICTED: protein NRT1/ PTR FAMILY 2.11-like [Solanum tuberosum]	RecName: Full=Protein NRT1/ PTR FAMILY 2.11; Short=AtNPF2.11; AltName: Full=Nitrate transporter 1.10; AltName: Full=Protein GLUCOSINOLATE TRANSPORTER-2;	SubName: Full=Uncharacterized protein {ECO:0000313|EnsemblPlants:PGSC0003DMT400065197};	H+/oligopeptide symporter	GO:0016021,integral component of membrane; GO:0005886,plasma membrane; GO:0009506,plasmodesma; GO:0090448,glucosinolate:proton symporter activity; GO:1901349,glucosinolate transport; GO:0090449,phloem glucosinolate loading; GO:0080167,response to karrikin	POT family
SMEL_003g190760.1	30.12	22.02	55.79	73.97	110.31	97.07	1014	824	1841	2323	3891	3022	2.823	1.497	4.18057e-05	0.000634486	up	SMEL3Ch03	87247263	87251714	+	SMEL_003g190760.1.01	--	K14638 solute carrier family 15 (peptide/histidine transporter), member 3/4 | (RefSeq) protein NRT1/ PTR FAMILY 2.11-like (A)	PREDICTED: protein NRT1/ PTR FAMILY 2.11-like [Solanum tuberosum]	RecName: Full=Protein NRT1/ PTR FAMILY 2.11; Short=AtNPF2.11; AltName: Full=Nitrate transporter 1.10; AltName: Full=Protein GLUCOSINOLATE TRANSPORTER-2;	SubName: Full=Uncharacterized protein {ECO:0000313|EnsemblPlants:PGSC0003DMT400065196};	H+/oligopeptide symporter	GO:0016021,integral component of membrane; GO:0005886,plasma membrane; GO:0009506,plasmodesma; GO:0090448,glucosinolate:proton symporter activity; GO:1901349,glucosinolate transport; GO:0090449,phloem glucosinolate loading; GO:0080167,response to karrikin	POT family
SMEL_003g191100.1	1.42	1.56	1.1	3.91	4.25	3.24	46	56	35	118	144	97	3.082	1.624	2.39612e-10	1.65726e-08	up	SMEL3Ch03	87555714	87557702	+	SMEL_003g191100.1.01	--	K05681 ATP-binding cassette, subfamily G (WHITE), member 2 | (RefSeq) ABC transporter G family member 23-like (A)	ABC transporter G family member 23 [Capsicum baccatum]	RecName: Full=ABC transporter G family member 23; Short=ABC transporter ABCG.23; Short=AtABCG23; AltName: Full=Probable white-brown complex homolog protein 24; Short=AtWBC24;	SubName: Full=ABC transporter G family member 23 {ECO:0000313|EMBL:PHT47790.1};	Transporter, ABC superfamily (Breast cancer resistance protein)	GO:0016021,integral component of membrane; GO:0005886,plasma membrane; GO:0005524,ATP binding; GO:0042626,ATPase activity, coupled to transmembrane movement of substances	ABC-2 type transporter
SMEL_003g191130.1	30.34	33.28	32.72	14.07	10.49	14.99	370	451	391	160	134	169	0.451	-1.149	2.08454e-08	9.02616e-07	down	SMEL3Ch03	87582997	87584647	-	SMEL_003g191130.1.01	--	K14492 two-component response regulator ARR-A family | (RefSeq) two-component response regulator ARR5 (A)	PREDICTED: two-component response regulator ARR5 [Solanum tuberosum]	RecName: Full=Two-component response regulator ARR6;	SubName: Full=Putative two-component response regulator ARR15-like {ECO:0000313|EMBL:JAP22444.1};	GATA-4/5/6 transcription factors	GO:0005634,nucleus; GO:0000156,phosphorelay response regulator activity; GO:0009736,cytokinin-activated signaling pathway; GO:0006355,regulation of transcription, DNA-templated; GO:0009735,response to cytokinin; GO:0006351,transcription, DNA-templated	Response regulator receiver domain
SMEL_003g191170.1	1.67	1.42	1.64	0.59	0.47	0.68	58	55	56	19	17	22	0.403	-1.312	0.00025605	0.00277163	down	SMEL3Ch03	87614966	87621170	+	SMEL_003g191170.1.01	--	K09391 transcription factor E2F7/8 | (RefSeq) E2F transcription factor-like E2FE (A)	E2F transcription factor-like E2FE [Capsicum chinense]	RecName: Full=E2F transcription factor-like E2FE; AltName: Full=DP-E2F-like protein 1; AltName: Full=E2F-like repressor E2L3;	SubName: Full=E2F transcription factor-like E2FE {ECO:0000313|EMBL:PHT98517.1};	Transcription factor E2F/dimerization partner (TDP)-like proteins	GO:0005634,nucleus; GO:0005667,transcription factor complex; GO:0003677,DNA binding; GO:0003700,DNA-binding transcription factor activity; GO:0042023,DNA endoreduplication; GO:0032876,negative regulation of DNA endoreduplication; GO:0006351,transcription, DNA-templated	E2F/DP family winged-helix DNA-binding domain
SMEL_003g191230.1	5.87	4.66	5.36	2.49	2.27	2.01	306	270	274	121	124	97	0.468	-1.094	4.57047e-08	1.76739e-06	down	SMEL3Ch03	87661884	87678755	-	SMEL_003g191230.1.01	--	K01205 alpha-N-acetylglucosaminidase [EC:3.2.1.50] | (RefSeq) alpha-N-acetylglucosaminidase-like (A)	PREDICTED: alpha-N-acetylglucosaminidase-like [Solanum tuberosum]	RecName: Full=Alpha-N-acetylglucosaminidase {ECO:0000305}; EC=3.2.1.50 {ECO:0000305}; AltName: Full=N-acetyl-glucosaminidase {ECO:0000303|PubMed:18782908}; Short=AtNAGLU {ECO:0000303|PubMed:18782908}; AltName: Full=Protein CYCLOPS 1 {ECO:0000303|PubMed:18782908}; Flags: Precursor;	SubName: Full=alpha-N-acetylglucosaminidase-like isoform X1 {ECO:0000313|RefSeq:XP_016563516.1};	Alpha-N-acetylglucosaminidase	GO:0005773,vacuole; GO:0004561,alpha-N-acetylglucosaminidase activity; GO:0009793,embryo development ending in seed dormancy; GO:0008152,metabolic process; GO:0051781,positive regulation of cell division	Alpha-N-acetylglucosaminidase (NAGLU) tim-barrel domain
SMEL_003g191300.1	5.62	10.64	6.71	3.25	2.68	3.36	76	160	89	41	38	42	0.445	-1.167	0.000491977	0.00467072	down	SMEL3Ch03	87741604	87745182	+	SMEL_003g191300.1.01	--	K20887 xyloglucan glycosyltransferase 4 [EC:2.4.1.-] | (RefSeq) xyloglucan glycosyltransferase 4-like (A)	PREDICTED: gibberellin-regulated protein 10-like [Capsicum annuum]	RecName: Full=Gibberellin-regulated protein 14; AltName: Full=GAST1 protein homolog 14; Flags: Precursor;	SubName: Full=gibberellin-regulated protein 10-like {ECO:0000313|RefSeq:XP_016563500.1};	--	GO:0005576,extracellular region; GO:0005886,plasma membrane; GO:0009740,gibberellic acid mediated signaling pathway; GO:2000377,regulation of reactive oxygen species metabolic process; GO:0009737,response to abscisic acid; GO:0009739,response to gibberellin; GO:0009651,response to salt stress	Gibberellin regulated protein
SMEL_003g191310.1	3.84	3.54	3.74	7.72	9.04	5.17	127	130	121	238	313	158	2.168	1.117	8.82854e-06	0.000173465	up	SMEL3Ch03	87762376	87768813	+	SMEL_003g191310.1.01	--	K21989 calcium permeable stress-gated cation channel | (RefSeq) CSC1-like protein RXW8 (A)	PREDICTED: calmodulin-binding protein 60 A-like isoform X2 [Ipomoea nil]	RecName: Full=Calmodulin-binding protein 60 A {ECO:0000303|PubMed:11782485};	SubName: Full=Uncharacterized protein {ECO:0000313|EnsemblPlants:PGSC0003DMT400062878};	--	GO:0005634,nucleus; GO:0005516,calmodulin binding; GO:0003677,DNA binding; GO:1902478,negative regulation of defense response to bacterium, incompatible interaction; GO:0006355,regulation of transcription, DNA-templated; GO:0006950,response to stress; GO:0006351,transcription, DNA-templated	Calmodulin binding protein-like
SMEL_003g191330.1	5.87	13.77	4.93	1.83	1.35	1.85	79	206	65	23	19	23	0.227	-2.137	2.5394e-06	5.91408e-05	down	SMEL3Ch03	87778892	87780733	-	SMEL_003g191330.1.01	--	K13993 HSP20 family protein | (RefSeq) 22.0 kDa class IV heat shock protein-like (A)	PREDICTED: 22.0 kDa class IV heat shock protein-like [Solanum pennellii]	RecName: Full=22.7 kDa class IV heat shock protein; Flags: Precursor;	SubName: Full=Uncharacterized protein {ECO:0000313|EnsemblPlants:Solyc03g113930.1.1};	Molecular chaperone (small heat-shock protein Hsp26/Hsp42)	GO:0005788,endoplasmic reticulum lumen	Hsp20/alpha crystallin family
SMEL_003g191510.1	78.17	73.31	96.52	224.56	154.8	148.98	3172	3306	3839	8500	6581	5590	2.319	1.213	3.98078e-08	1.58088e-06	up	SMEL3Ch03	88029913	88041070	+	SMEL_003g191510.1.01	--	K08332 vacuolar protein 8 | (RefSeq) U-box domain-containing protein 11-like (A)	PREDICTED: U-box domain-containing protein 19-like [Solanum pennellii]	RecName: Full=U-box domain-containing protein 19; EC=2.3.2.27; AltName: Full=Plant U-box protein 19; AltName: Full=RING-type E3 ubiquitin transferase PUB19 {ECO:0000305};	RecName: Full=RING-type E3 ubiquitin transferase {ECO:0000256|SAAS:SAAS00702733}; EC=2.3.2.27 {ECO:0000256|SAAS:SAAS00702733};	FOG: Armadillo/beta-catenin-like repeats	GO:0005737,cytoplasm; GO:0005634,nucleus; GO:0004842,ubiquitin-protein transferase activity; GO:0010029,regulation of seed germination	U-box domain
SMEL_003g191690.1	54.8	66.84	100.25	67.07	187.94	186.8	1463	1983	2623	1670	5256	4611	2.185	1.128	0.00609898	0.0336923	up	SMEL3Ch03	88242938	88245159	-	SMEL_003g191690.1.01	--	--	PREDICTED: probable inactive poly [ADP-ribose]	RecName: Full=Probable inactive poly [ADP-ribose] polymerase SRO5; AltName: Full=Protein SIMILAR TO RCD ONE 5;	SubName: Full=Uncharacterized protein {ECO:0000313|EnsemblPlants:PGSC0003DMT400063249};	--	GO:0005739,mitochondrion; GO:0016363,nuclear matrix; GO:0003950,NAD+ ADP-ribosyltransferase activity; GO:0007275,multicellular organism development; GO:0072593,reactive oxygen species metabolic process; GO:0009651,response to salt stress	RCD1-SRO-TAF4 (RST) plant domain
SMEL_003g191760.1	11.65	13.32	8.29	4.42	4.28	3.67	96	122	67	34	37	28	0.412	-1.279	1.60774e-05	0.000288903	down	SMEL3Ch03	88314167	88314673	-	SMEL_003g191760.1.01	--	K01689 enolase [EC:4.2.1.11] | (RefSeq) enolase 1, chloroplastic-like (A)	PREDICTED: ethylene-responsive transcription factor CRF3-like [Solanum tuberosum]	RecName: Full=Ethylene-responsive transcription factor RAP2-11; AltName: Full=Protein RELATED TO APETALA2 11;	SubName: Full=Uncharacterized protein {ECO:0000313|EnsemblPlants:PGSC0003DMT400063264};	--	GO:0005634,nucleus; GO:0003700,DNA-binding transcription factor activity; GO:0043565,sequence-specific DNA binding; GO:0035865,cellular response to potassium ion; GO:0009873,ethylene-activated signaling pathway; GO:0048528,post-embryonic root development; GO:0009723,response to ethylene; GO:0000302,response to reactive oxygen species; GO:0006351,transcription, DNA-templated	AP2 domain
SMEL_003g191770.1	0.9	0.99	1.08	0.38	0.45	0.13	23	28	27	9	12	3	0.355	-1.496	0.00786584	0.0407241	down	SMEL3Ch03	88317778	88321480	+	SMEL_003g191770.1.01	--	K17525 chitinase domain-containing protein 1 | (RefSeq) hypothetical protein (A)	Calcium sensing receptor, chloroplastic [Capsicum baccatum]	RecName: Full=Calcium sensing receptor, chloroplastic; AltName: Full=Sulfurtransferase 3; Short=AtStr3; Flags: Precursor;	SubName: Full=Calcium sensing receptor, chloroplastic {ECO:0000313|EMBL:PHT47761.1};	--	GO:0009507,chloroplast; GO:0009534,chloroplast thylakoid; GO:0009535,chloroplast thylakoid membrane; GO:0016021,integral component of membrane; GO:0005739,mitochondrion; GO:0009579,thylakoid; GO:0071277,cellular response to calcium ion; GO:0009704,de-etiolation; GO:0090333,regulation of stomatal closure	Rhodanese-like domain
SMEL_003g191930.1	6.21	6.76	6.55	17.84	21.12	18.58	267	323	276	716	952	739	3.251	1.701	2.3497e-26	1.86268e-23	up	SMEL3Ch03	88469339	88484569	+	SMEL_003g191930.1.01	--	K04773 protease IV [EC:3.4.21.-] | (RefSeq) serine protease SPPA, chloroplastic (A)	PREDICTED: serine protease SPPA, chloroplastic isoform X1 [Solanum tuberosum]	RecName: Full=Serine protease SPPA, chloroplastic; EC=3.4.21.-; AltName: Full=Signal peptide peptidase SPPA; Flags: Precursor;	SubName: Full=Uncharacterized protein {ECO:0000313|EnsemblPlants:Solyc03g114640.2.1};	--	GO:0009507,chloroplast; GO:0009941,chloroplast envelope; GO:0009570,chloroplast stroma; GO:0009534,chloroplast thylakoid; GO:0009535,chloroplast thylakoid membrane; GO:0016021,integral component of membrane; GO:0004252,serine-type endopeptidase activity; GO:0006508,proteolysis; GO:0006465,signal peptide processing	Peptidase family S49
SMEL_003g192030.1	12.83	12.59	15.08	22.76	32.82	32.25	551	601	635	912	1477	1281	2.388	1.256	2.63823e-08	1.11199e-06	up	SMEL3Ch03	88573855	88581032	+	SMEL_003g192030.1.01	--	--	PREDICTED: transcription factor BIM1 isoform X2 [Solanum pennellii]	RecName: Full=Transcription factor BIM1; AltName: Full=BES1-interacting Myc-like protein 1; AltName: Full=Basic helix-loop-helix protein 46; Short=AtbHLH46; Short=bHLH 46; AltName: Full=Transcription factor EN 126; AltName: Full=bHLH transcription factor bHLH046;	SubName: Full=Uncharacterized protein {ECO:0000313|EnsemblPlants:Solyc03g114720.2.1};	--	GO:0005634,nucleus; GO:0003677,DNA binding; GO:0046983,protein dimerization activity; GO:0006355,regulation of transcription, DNA-templated; GO:0006351,transcription, DNA-templated	Helix-loop-helix DNA-binding domain
SMEL_003g192330.1	0.74	1.02	1.35	3.22	5.16	8.93	15	23	27	61	110	168	6.15	2.621	3.11814e-08	1.28536e-06	up	SMEL3Ch03	88923341	88924651	+	SMEL_003g192330.1.01	--	K22683 aspartyl protease family protein [EC:3.4.23.-] | (RefSeq) aspartyl protease family protein 2 (A)	hypothetical protein BC332_09072 [Capsicum chinense]	RecName: Full=Basic 7S globulin 2; AltName: Full=SBg7S; Short=Bg; Contains: RecName: Full=Basic 7S globulin 2 high kDa subunit; Contains: RecName: Full=Basic 7S globulin 2 low kDa subunit; Flags: Precursor;	SubName: Full=Uncharacterized protein {ECO:0000313|EMBL:PHU23965.1};	Aspartyl protease	GO:0004190,aspartic-type endopeptidase activity; GO:0045735,nutrient reservoir activity; GO:0030163,protein catabolic process; GO:0006508,proteolysis	Xylanase inhibitor C-terminal
SMEL_003g192350.1	0.13	0.28	0.64	0.97	1.94	0.88	4	10	20	29	65	26	3.936	1.977	0.00214262	0.0150447	up	SMEL3Ch03	88930092	88934444	-	SMEL_003g192350.1.01	--	--	PREDICTED: uncharacterized protein LOC101255575 [Solanum lycopersicum]	--	SubName: Full=Putative ovule protein {ECO:0000313|EMBL:JAP28803.1};	--	--	--
SMEL_003g192470.1	45.93	93.95	33.98	9.28	9.37	9.15	2335	5308	1693	440	499	430	0.179	-2.485	2.27063e-14	3.3913e-12	down	SMEL3Ch03	89039070	89043209	-	SMEL_003g192470.1.01	--	K03695 ATP-dependent Clp protease ATP-binding subunit ClpB | (RefSeq) chaperone protein ClpB1 (A)	PREDICTED: chaperone protein ClpB1 [Solanum lycopersicum]	RecName: Full=Chaperone protein ClpB1; AltName: Full=ATP-dependent Clp protease ATP-binding subunit ClpB homolog 1; AltName: Full=Casein lytic proteinase B1; AltName: Full=Heat shock protein 101; AltName: Full=Protein DEFECTIVE IN LONG-TERM ACQUIRED THERMOTOLERANCE {ECO:0000303|PubMed:23439916};	SubName: Full=Uncharacterized protein {ECO:0000313|EnsemblPlants:Solyc03g115230.2.1};	Chaperone HSP104 and related ATP-dependent Clp proteases	GO:0009941,chloroplast envelope; GO:0009570,chloroplast stroma; GO:0005829,cytosol; GO:0005634,nucleus; GO:0005524,ATP binding; GO:0045727,positive regulation of translation; GO:0019538,protein metabolic process; GO:0043335,protein unfolding; GO:0009408,response to heat; GO:0009644,response to high light intensity; GO:0042542,response to hydrogen peroxide	AAA domain (Cdc48 subfamily)
SMEL_003g192560.1	143.66	144.14	288.12	315.52	480.33	434.24	7133	7954	14021	14613	24985	19936	2.317	1.212	0.000361759	0.00363364	up	SMEL3Ch03	89144516	89152246	+	SMEL_003g192560.1.01	--	K00901 diacylglycerol kinase (ATP) [EC:2.7.1.107] | (RefSeq) diacylglycerol kinase 1-like (A)	PREDICTED: diacylglycerol kinase 1-like [Solanum tuberosum]	RecName: Full=Diacylglycerol kinase 1; Short=AtDGK1; Short=DAG kinase 1; EC=2.7.1.107; AltName: Full=Diglyceride kinase 1; Short=DGK 1;	RecName: Full=Diacylglycerol kinase {ECO:0000256|RuleBase:RU361128}; Short=DAG kinase {ECO:0000256|RuleBase:RU361128}; EC=2.7.1.107 {ECO:0000256|RuleBase:RU361128};	Diacylglycerol kinase	GO:0016021,integral component of membrane; GO:0005622,intracellular; GO:0005524,ATP binding; GO:0005509,calcium ion binding; GO:0003951,NAD+ kinase activity; GO:0006952,defense response; GO:0035556,intracellular signal transduction; GO:0007205,protein kinase C-activating G protein-coupled receptor signaling pathway	Diacylglycerol kinase accessory domain
SMEL_003g192800.1	65.38	70.65	37.6	17.77	12.79	12.26	761	914	429	193	156	132	0.274	-1.87	3.28089e-13	3.90881e-11	down	SMEL3Ch03	89351327	89354275	+	SMEL_003g192800.1.01	--	--	PREDICTED: uncharacterized protein At5g01610-like [Capsicum annuum]	RecName: Full=Uncharacterized protein At5g01610;	SubName: Full=Uncharacterized protein {ECO:0000313|EMBL:PHT47701.1};	--	--	Protein of unknown function, DUF538
SMEL_003g192870.1	0.31	0.15	0.29	0.52	0.76	0.68	13	7	12	20	33	26	2.854	1.513	0.00305379	0.0197186	up	SMEL3Ch03	89450599	89453151	-	SMEL_003g192870.1.01	--	K04733 interleukin-1 receptor-associated kinase 4 [EC:2.7.11.1] | (RefSeq) probable receptor-like protein kinase At5g61350 (A)	PREDICTED: probable receptor-like protein kinase At5g61350 [Capsicum annuum]	RecName: Full=Probable receptor-like protein kinase At5g61350; EC=2.7.11.-; Flags: Precursor;	SubName: Full=probable receptor-like protein kinase At5g61350 {ECO:0000313|RefSeq:XP_016563273.1};	Serine/threonine protein kinase	GO:0016021,integral component of membrane; GO:0009705,plant-type vacuole membrane; GO:0005524,ATP binding; GO:0004672,protein kinase activity; GO:0004674,protein serine/threonine kinase activity; GO:0097275,cellular ammonia homeostasis; GO:0051924,regulation of calcium ion transport; GO:0080147,root hair cell development	Protein tyrosine kinase
SMEL_003g192930.1	18.73	19.08	21.93	38.19	39.65	40.38	664	752	762	1263	1473	1324	2.173	1.12	6.44393e-12	6.09247e-10	up	SMEL3Ch03	89491683	89500433	-	SMEL_003g192930.1.01	--	K12127 pseudo-response regulator 1 | (RefSeq) two-component response regulator-like APRR1 (A)	PREDICTED: two-component response regulator-like APRR1 [Solanum tuberosum]	RecName: Full=Two-component response regulator-like APRR1; AltName: Full=ABI3-interacting protein 1; AltName: Full=Pseudo-response regulator 1; AltName: Full=Timing of CAB expression 1;	SubName: Full=Uncharacterized protein {ECO:0000313|EnsemblPlants:PGSC0003DMT400050252};	GATA-4/5/6 transcription factors	GO:0005634,nucleus; GO:0003677,DNA binding; GO:0003700,DNA-binding transcription factor activity; GO:0007623,circadian rhythm; GO:0010031,circumnutation; GO:0009908,flower development; GO:0010629,negative regulation of gene expression; GO:0000160,phosphorelay signal transduction system; GO:0010468,regulation of gene expression; GO:0006355,regulation of transcription, DNA-templated; GO:0006351,tra…	Response regulator receiver domain
SMEL_003g193010.1	7.21	6.63	10.71	19.44	40.17	38.93	134	137	195	337	782	669	4.408	2.14	1.3067e-09	7.65124e-08	up	SMEL3Ch03	89577141	89578608	-	SMEL_003g193010.1.01	--	K00521 ferric-chelate reductase [EC:1.16.1.7] | (RefSeq) ferric reduction oxidase 7, chloroplastic-like (A)	NAC domain-containing protein [Solanum lycopersicum]	RecName: Full=NAC domain-containing protein 100 {ECO:0000303|PubMed:15029955}; Short=ANAC100 {ECO:0000303|PubMed:15029955}; Short=AtNAC5;	SubName: Full=Uncharacterized protein {ECO:0000313|EnsemblPlants:Solyc03g115850.2.1};	--	GO:0005634,nucleus; GO:0003677,DNA binding; GO:0003700,DNA-binding transcription factor activity; GO:0006351,transcription, DNA-templated	No apical meristem (NAM) protein
SMEL_003g193040.1	16.71	14.1	20.95	38.21	44.39	48.23	323	303	397	689	899	862	2.771	1.471	3.93273e-10	2.57325e-08	up	SMEL3Ch03	89605514	89606937	+	SMEL_003g193040.1.01	--	K03671 thioredoxin 1 | (RefSeq) thioredoxin-like 1-2, chloroplastic isoform X1 (A)	PREDICTED: thioredoxin-like 1-2, chloroplastic [Solanum tuberosum]	RecName: Full=Thioredoxin-like 1-2, chloroplastic; AltName: Full=Atypical cysteine/histidine-rich thioredoxin 5; Short=AtACHT5; AltName: Full=Lilium-type thioredoxin 1-2; Flags: Precursor;	SubName: Full=Uncharacterized protein {ECO:0000313|EnsemblPlants:PGSC0003DMT400050229};	Thioredoxin	GO:0009507,chloroplast; GO:0045454,cell redox homeostasis; GO:0055114,oxidation-reduction process	Thioredoxin
SMEL_003g193070.1	3.52	1.8	4.17	4.46	11.01	7.1	44	25	51	52	144	82	2.617	1.388	0.0026772	0.0178114	up	SMEL3Ch03	89623563	89626380	-	SMEL_003g193070.1.01	--	K04454 MADS-box transcription enhancer factor 2C | (RefSeq) agamous-like MADS-box protein AGL65 (A)	PREDICTED: agamous-like MADS-box protein AGL65 [Solanum tuberosum]	RecName: Full=Agamous-like MADS-box protein AGL65 {ECO:0000305};	SubName: Full=Uncharacterized protein {ECO:0000313|EnsemblPlants:Solyc03g115910.1.1};	MADS box transcription factor	GO:0005634,nucleus; GO:0003700,DNA-binding transcription factor activity; GO:0046983,protein dimerization activity; GO:0000987,proximal promoter sequence-specific DNA binding; GO:0000982,transcription factor activity, RNA polymerase II proximal promoter sequence-specific DNA binding; GO:0010152,pollen maturation; GO:0045944,positive regulation of transcription by RNA polymerase II; GO:0080092,reg…	SRF-type transcription factor (DNA-binding and dimerisation domain)
SMEL_003g193200.1	36.99	52.33	65.32	21.01	21.2	21.19	353	555	611	187	212	187	0.447	-1.161	1.36027e-05	0.000252581	down	SMEL3Ch03	89711566	89713281	-	SMEL_003g193200.1.01	--	K03860 phosphatidylinositol glycan, class Q | (RefSeq) N-acetylglucosaminyl-phosphatidylinositol biosynthetic protein gpi1-like (A)	PREDICTED: gibberellin-regulated protein 6-like [Nicotiana tabacum]	RecName: Full=Gibberellin-regulated protein 6; AltName: Full=GAST1 protein homolog 6; Flags: Precursor;	SubName: Full=gibberellin-regulated protein 6-like {ECO:0000313|RefSeq:XP_016473209.1};	--	GO:0005576,extracellular region; GO:0009740,gibberellic acid mediated signaling pathway; GO:0009750,response to fructose; GO:0009749,response to glucose; GO:0080167,response to karrikin; GO:0009744,response to sucrose	Gibberellin regulated protein
SMEL_003g193410.1	0.25	0.38	0.78	1.36	2.74	1.64	3	5	9	15	34	18	4.487	2.166	0.00107026	0.0086847	up	SMEL3Ch03	89943930	89945060	-	SMEL_003g193410.1.01	--	--	late embryogenesis abundant protein [Solanum lycopersicum]	RecName: Full=Late embryogenesis abundant protein Dc3;	SubName: Full=Late embryogenesis abundant protein {ECO:0000313|EMBL:ADL70200.1, ECO:0000313|EnsemblPlants:Solyc03g116390.2.1};	Uncharacterized conserved protein	--	Apolipoprotein A1/A4/E domain
SMEL_003g193490.1	42.21	51.55	131.46	264.63	368.01	424.13	210	285	641	1228	1918	1951	5.057	2.338	8.2612e-08	2.92061e-06	up	SMEL3Ch03	90006185	90006490	+	SMEL_003g193490.1.01	--	--	PREDICTED: uncharacterized protein LOC107013882 [Solanum pennellii]	--	SubName: Full=Uncharacterized protein {ECO:0000313|EnsemblPlants:Solyc03g116510.1.1};	--	--	Cotton fibre expressed protein
SMEL_003g193500.1	1.96	3.34	3.78	6.08	12.49	24.3	9	17	17	26	60	103	5.23	2.387	4.40783e-05	0.00066331	up	SMEL3Ch03	90008336	90008617	+	SMEL_003g193500.1.01	--	--	PREDICTED: uncharacterized protein LOC107013882 [Solanum pennellii]	--	SubName: Full=Uncharacterized protein {ECO:0000313|EnsemblPlants:Solyc03g116510.1.1};	--	--	Cotton fibre expressed protein
SMEL_003g193570.1	72.03	65.09	93.41	111.55	188.22	154.76	1815	1823	2307	2622	4969	3606	2.162	1.112	3.18396e-05	0.000507738	up	SMEL3Ch03	90060370	90067287	-	SMEL_003g193570.1.01	--	K20472 coatomer subunit zeta | (RefSeq) probable coatomer subunit zeta-B (A)	PREDICTED: uncharacterized protein LOC107015438 [Solanum pennellii]	RecName: Full=Embryo-specific protein ATS3B {ECO:0000305}; AltName: Full=Protein ARABIDOPSIS THALIANA SEED 3B {ECO:0000305}; Flags: Precursor;	SubName: Full=Putative ovule protein {ECO:0000313|EMBL:JAP23021.1};	--	GO:0031225,anchored component of membrane; GO:0005576,extracellular region; GO:0005774,vacuolar membrane	Embryo-specific protein 3, (ATS3)
SMEL_003g193580.1	2.12	2.26	1.52	0.42	0.6	0.76	27	32	19	5	8	9	0.335	-1.576	0.00316991	0.0202464	down	SMEL3Ch03	90077614	90078574	-	SMEL_003g193580.1.01	--	K13434 pathogenesis-related genes transcriptional activator PTI6 | (RefSeq) pathogenesis-related genes transcriptional activator PTI6-like (A)	PREDICTED: ethylene-responsive transcription factor WIN1 [Solanum tuberosum]	RecName: Full=Ethylene-responsive transcription factor WIN1; AltName: Full=Protein SHINE 1; AltName: Full=Protein WAX INDUCER 1;	SubName: Full=Uncharacterized protein {ECO:0000313|EnsemblPlants:PGSC0003DMT400001703};	--	GO:0005634,nucleus; GO:0003700,DNA-binding transcription factor activity; GO:0043565,sequence-specific DNA binding; GO:0010143,cutin biosynthetic process; GO:0009873,ethylene-activated signaling pathway; GO:0009414,response to water deprivation; GO:0006351,transcription, DNA-templated; GO:0010166,wax metabolic process	AP2 domain
SMEL_003g193640.1	68.23	69.11	41.32	29.05	22.5	23.31	1624	1828	964	645	561	513	0.465	-1.105	1.28711e-07	4.36327e-06	down	SMEL3Ch03	90118065	90120633	+	SMEL_003g193640.1.01	--	--	PREDICTED: twist-related protein 1 [Solanum tuberosum]	--	SubName: Full=Putative twist-related protein 1-like {ECO:0000313|EMBL:JAP26153.1};	--	--	Tetratricopeptide repeat
SMEL_003g193850.1	5.58	6.79	4.48	2.56	2.09	2.46	145	196	114	62	57	59	0.466	-1.102	7.69482e-06	0.000154216	down	SMEL3Ch03	90289942	90292789	-	SMEL_003g193850.1.01	--	--	PREDICTED: photosynthetic NDH subunit of subcomplex B 1, chloroplastic [Solanum tuberosum]	RecName: Full=Photosynthetic NDH subunit of subcomplex B 1, chloroplastic {ECO:0000303|PubMed:21785130}; Short=Protein PnsB1 {ECO:0000303|PubMed:21785130}; AltName: Full=NAD(P)H DEHYDROGENASE SUBUNIT 48 {ECO:0000303|PubMed:18974055}; AltName: Full=NDH-DEPENDENT CYCLIC ELECTRON FLOW 1 {ECO:0000303|PubMed:18785996}; Flags: Precursor;	SubName: Full=Uncharacterized protein {ECO:0000313|EnsemblPlants:PGSC0003DMT400051045};	--	GO:0009507,chloroplast; GO:0009534,chloroplast thylakoid; GO:0009535,chloroplast thylakoid membrane; GO:0010598,NAD(P)H dehydrogenase complex (plastoquinone); GO:0009773,photosynthetic electron transport in photosystem I	--
SMEL_003g193970.1	1.79	2.6	2.11	6.34	11.3	14.88	13	21	15	43	86	100	5.554	2.474	3.1655e-08	1.30228e-06	up	SMEL3Ch03	90665653	90666099	+	SMEL_003g193970.1.01	--	K19041 E3 ubiquitin-protein ligase RNF38/44 [EC:2.3.2.27] | (RefSeq) RING-H2 finger protein ATL46 (A)	PREDICTED: RING-H2 finger protein ATL46-like [Solanum tuberosum]	RecName: Full=RING-H2 finger protein ATL46; EC=2.3.2.27 {ECO:0000305}; AltName: Full=RING-type E3 ubiquitin transferase ATL46 {ECO:0000305};	SubName: Full=Uncharacterized protein {ECO:0000313|EnsemblPlants:PGSC0003DMT400091423};	FOG: Predicted E3 ubiquitin ligase	GO:0016021,integral component of membrane; GO:0046872,metal ion binding; GO:0061630,ubiquitin protein ligase activity; GO:0043161,proteasome-mediated ubiquitin-dependent protein catabolic process	--
SMEL_003g194000.1	2.27	2.18	3.8	5.06	5.89	5.65	91	97	149	189	247	209	2.195	1.134	0.000158356	0.0018954	up	SMEL3Ch03	90672102	90678401	-	SMEL_003g194000.1.01	--	K05391 cyclic nucleotide gated channel, plant | (RefSeq) probable cyclic nucleotide-gated ion channel 16 (A)	PREDICTED: probable cyclic nucleotide-gated ion channel 16 [Solanum tuberosum]	RecName: Full=Probable cyclic nucleotide-gated ion channel 16; AltName: Full=Cyclic nucleotide- and calmodulin-regulated ion channel 16;	SubName: Full=Uncharacterized protein {ECO:0000313|EnsemblPlants:PGSC0003DMT400063232};	K+-channel ERG and related proteins, contain PAS/PAC sensor domain	GO:0005887,integral component of plasma membrane; GO:0005516,calmodulin binding; GO:0030552,cAMP binding; GO:0030553,cGMP binding; GO:0005249,voltage-gated potassium channel activity; GO:0042391,regulation of membrane potential	Ion transport protein
SMEL_003g194220.1	26.12	22.43	13.66	7.73	7.51	4.9	634	605	325	175	191	110	0.359	-1.476	4.69812e-08	1.80996e-06	down	SMEL3Ch03	90852978	90855936	-	SMEL_003g194220.1.01	--	K09874 aquaporin NIP | (RefSeq) aquaporin NIP6-1 (A)	PREDICTED: aquaporin NIP6-1 [Solanum tuberosum]	RecName: Full=Aquaporin NIP6-1; AltName: Full=NOD26-like intrinsic protein 6-1; Short=AtNIP6;1;	SubName: Full=Uncharacterized protein {ECO:0000313|EnsemblPlants:PGSC0003DMT400036625};	Aquaporin (major intrinsic protein family)	GO:0005887,integral component of plasma membrane; GO:0005886,plasma membrane; GO:0046715,active borate transmembrane transporter activity; GO:0015267,channel activity; GO:0015168,glycerol transmembrane transporter activity; GO:0015204,urea transmembrane transporter activity; GO:0046713,borate transport; GO:0080029,cellular response to boron-containing substance levels	Major intrinsic protein
SMEL_003g194310.1	2.23	7.46	9.1	12.42	23.57	32.1	25	93	100	130	277	333	3.969	1.989	0.000134526	0.00166031	up	SMEL3Ch03	91407026	91407808	+	SMEL_003g194310.1.01	--	K11975 E3 ubiquitin-protein ligase RNF144 [EC:2.3.2.31] | (RefSeq) probable E3 ubiquitin-protein ligase RNF217 (A)	ring finger like protein [Solanum tuberosum]	RecName: Full=ATP-dependent RNA helicase DEAH12, chloroplastic; EC=3.6.4.13; Flags: Precursor;	RecName: Full=RING-type E3 ubiquitin transferase {ECO:0000256|SAAS:SAAS00970528}; EC=2.3.2.27 {ECO:0000256|SAAS:SAAS00970528};	Predicted E3 ubiquitin ligase	GO:0009507,chloroplast; GO:0005737,cytoplasm; GO:0005730,nucleolus; GO:0005524,ATP binding; GO:0004004,ATP-dependent RNA helicase activity; GO:0046872,metal ion binding; GO:0003723,RNA binding; GO:0006396,RNA processing	IBR domain, a half RING-finger domain
SMEL_003g194320.1	128.86	154.86	170.99	236.61	369.54	316.24	1567	2093	2038	2684	4708	3556	2.23	1.157	1.00799e-06	2.64658e-05	up	SMEL3Ch03	91408983	91409849	+	SMEL_003g194320.1.01	--	K11975 E3 ubiquitin-protein ligase RNF144 [EC:2.3.2.31] | (RefSeq) probable E3 ubiquitin-protein ligase RNF217 (A)	PREDICTED: probable E3 ubiquitin-protein ligase RNF217 [Solanum tuberosum]	RecName: Full=ATP-dependent RNA helicase DEAH12, chloroplastic; EC=3.6.4.13; Flags: Precursor;	RecName: Full=RING-type E3 ubiquitin transferase {ECO:0000256|SAAS:SAAS00970528}; EC=2.3.2.27 {ECO:0000256|SAAS:SAAS00970528};	Predicted E3 ubiquitin ligase	GO:0009507,chloroplast; GO:0005737,cytoplasm; GO:0005730,nucleolus; GO:0005524,ATP binding; GO:0004004,ATP-dependent RNA helicase activity; GO:0046872,metal ion binding; GO:0003723,RNA binding; GO:0006396,RNA processing	IBR domain, a half RING-finger domain
SMEL_003g194330.1	1.9	2.45	2.96	6.99	5.01	5.64	51	73	78	175	141	140	2.635	1.398	4.48409e-07	1.30539e-05	up	SMEL3Ch03	91410656	91424911	+	SMEL_003g194330.1.01	--	K02960 small subunit ribosomal protein S16e | (RefSeq) uncharacterized protein LOC110817833 (A)	PREDICTED: ribulose bisphosphate carboxylase/oxygenase activase, chloroplastic [Solanum tuberosum]	RecName: Full=Ribulose bisphosphate carboxylase/oxygenase activase, chloroplastic; Short=RA; Short=RuBisCO activase; Flags: Precursor;	SubName: Full=Uncharacterized protein {ECO:0000313|EnsemblPlants:Solyc03g117850.2.1};	26S proteasome regulatory complex, ATPase RPT4	GO:0009570,chloroplast stroma; GO:0009579,thylakoid; GO:0005524,ATP binding; GO:0046863,ribulose-1,5-bisphosphate carboxylase/oxygenase activator activity	ATPase family associated with various cellular activities (AAA)
SMEL_003g194340.1	34.56	35.95	32.83	52.35	61.59	95.67	218	252	203	308	407	558	2.25	1.17	1.62251e-05	0.000291049	up	SMEL3Ch03	91441068	91443728	+	SMEL_003g194340.1.01	--	--	PREDICTED: uncharacterized protein LOC107015442 [Solanum pennellii]	--	SubName: Full=Uncharacterized protein {ECO:0000313|EnsemblPlants:Solyc03g117840.2.1};	--	--	--
SMEL_003g194370.1	89.61	83.3	64.14	37.55	30.2	27.85	1719	1776	1206	672	607	494	0.445	-1.167	2.11372e-12	2.17829e-10	down	SMEL3Ch03	91456499	91462091	+	SMEL_003g194370.1.01	--	K05658 ATP-binding cassette, subfamily B (MDR/TAP), member 1 [EC:3.6.3.44] | (RefSeq) ABC transporter B family member 13-like (A)	PREDICTED: ABC transporter I family member 17-like [Solanum pennellii]	RecName: Full=ABC transporter I family member 17; Short=ABC transporter ABCI.17; Short=AtABCI17; AltName: Full=MRP-related protein 1; AltName: Full=Non-intrinsic ABC protein 3;	SubName: Full=Uncharacterized protein {ECO:0000313|EnsemblPlants:PGSC0003DMT400036875};	Multidrug/pheromone exporter, ABC superfamily	GO:0005886,plasma membrane; GO:0005774,vacuolar membrane; GO:0005524,ATP binding; GO:0016887,ATPase activity; GO:0005315,inorganic phosphate transmembrane transporter activity; GO:0005215,transporter activity; GO:0035435,phosphate ion transmembrane transport	ABC transporter
SMEL_003g194470.1	8.91	9.01	6.08	3.39	3.27	2.71	299	336	200	106	115	84	0.432	-1.21	1.37034e-08	6.1267e-07	down	SMEL3Ch03	91538474	91543036	+	SMEL_003g194470.1.01	--	--	PREDICTED: probable folate-biopterin transporter 3 isoform X1 [Nicotiana tomentosiformis]	RecName: Full=Probable folate-biopterin transporter 2;	SubName: Full=probable folate-biopterin transporter 3 isoform X1 {ECO:0000313|RefSeq:XP_016495799.1};	--	GO:0016021,integral component of membrane	BT1 family
SMEL_003g194540.1	129.25	287.87	101.31	25.12	44.79	23.87	4457	11032	3424	808	1618	761	0.202	-2.305	2.62165e-09	1.4035e-07	down	SMEL3Ch03	91601924	91604358	+	SMEL_003g194540.1.01	--	K03283 heat shock 70kDa protein 1/2/6/8 | (RefSeq) heat shock 70 kDa protein 5 (A)	PREDICTED: heat shock 70 kDa protein 5 [Solanum tuberosum]	RecName: Full=Heat shock 70 kDa protein;	SubName: Full=Uncharacterized protein {ECO:0000313|EnsemblPlants:PGSC0003DMT400036856};	Molecular chaperones HSP70/HSC70, HSP70 superfamily	GO:0005524,ATP binding	Hsp70 protein
SMEL_003g194550.1	3.98	5.73	3.86	2.45	1.71	1.08	40	64	38	23	18	10	0.424	-1.238	0.00344262	0.0216659	down	SMEL3Ch03	91605226	91607211	+	SMEL_003g194550.1.01	--	--	PREDICTED: uncharacterized protein LOC109119876 [Solanum lycopersicum]	--	SubName: Full=Uncharacterized protein {ECO:0000313|EnsemblPlants:PGSC0003DMT400036992};	--	GO:0016021,integral component of membrane	--
SMEL_003g194590.1	1.96	2.29	2.68	0.77	0.69	1.04	79	103	106	29	29	39	0.395	-1.34	4.36652e-05	0.000659812	down	SMEL3Ch03	91642530	91646657	+	SMEL_003g194590.1.01	--	K17964 leucine-rich PPR motif-containing protein, mitochondrial | (RefSeq) pentatricopeptide repeat-containing protein At1g79540 (A)	PREDICTED: pentatricopeptide repeat-containing protein At1g80880, mitochondrial [Solanum pennellii]	RecName: Full=Pentatricopeptide repeat-containing protein At1g80880, mitochondrial; Flags: Precursor;	SubName: Full=Uncharacterized protein {ECO:0000313|EnsemblPlants:PGSC0003DMT400036850};	FOG: PPR repeat	GO:0043231,intracellular membrane-bounded organelle; GO:0005739,mitochondrion; GO:0004519,endonuclease activity; GO:0003723,RNA binding; GO:0009451,RNA modification	PPR repeat family
SMEL_003g194730.1	6.6	6.92	0.3	0.42	0.66	0.21	67	78	3	4	7	2	0.107	-3.226	0.000688192	0.00607466	down	SMEL3Ch03	91766320	91767890	-	SMEL_003g194730.1.01	--	K05387 glutamate receptor, ionotropic, plant | (RefSeq) LOW QUALITY PROTEIN: glutamate receptor 2.3-like (A)	PREDICTED: major allergen Pru ar 1-like [Capsicum annuum]	RecName: Full=Major allergen Pru ar 1; AltName: Allergen=Pru ar 1;	SubName: Full=major allergen Pru ar 1-like {ECO:0000313|RefSeq:XP_016562953.1};	DEAD-box protein abstrakt	GO:0006952,defense response; GO:0009607,response to biotic stimulus	Pathogenesis-related protein Bet v I family
SMEL_003g194740.1	1.44	0.93	0.21	0	0.1	0	14	10	2	0	1	0	0.05	-4.322	0.00636868	0.0348844	down	SMEL3Ch03	91768850	91769546	-	SMEL_003g194740.1.01	--	K05387 glutamate receptor, ionotropic, plant | (RefSeq) LOW QUALITY PROTEIN: glutamate receptor 2.3-like (A)	PREDICTED: major allergen Pru ar 1-like [Capsicum annuum]	RecName: Full=Major allergen Pru ar 1; AltName: Allergen=Pru ar 1;	SubName: Full=major allergen Pru ar 1-like {ECO:0000313|RefSeq:XP_016562953.1};	--	GO:0006952,defense response; GO:0009607,response to biotic stimulus	Pathogenesis-related protein Bet v I family
SMEL_003g194750.1	1.96	1.76	0	0.11	0	0	19	19	0	1	0	0	0.035	-4.834	0.00743367	0.039006	down	SMEL3Ch03	91770648	91771344	-	SMEL_003g194750.1.01	--	K05387 glutamate receptor, ionotropic, plant | (RefSeq) LOW QUALITY PROTEIN: glutamate receptor 2.3-like (A)	PREDICTED: major allergen Pru ar 1-like [Capsicum annuum]	RecName: Full=Major allergen Pru ar 1; AltName: Allergen=Pru ar 1;	SubName: Full=major allergen Pru ar 1-like {ECO:0000313|RefSeq:XP_016562953.1};	--	GO:0006952,defense response; GO:0009607,response to biotic stimulus	Pathogenesis-related protein Bet v I family
SMEL_003g194880.1	53.03	40.39	114.39	113.29	149.92	131.01	1838	1556	3886	3663	5444	4199	2.044	1.031	0.00771567	0.0401687	up	SMEL3Ch03	91902809	91907403	-	SMEL_003g194880.1.01	--	--	PREDICTED: uncharacterized protein LOC107015132 [Solanum pennellii]	--	SubName: Full=Uncharacterized protein {ECO:0000313|EnsemblPlants:Solyc03g117280.2.1};	--	GO:0016021,integral component of membrane	Tetraspanin family
SMEL_003g194890.1	9.82	10.87	17.46	29.43	40.55	49.8	113	139	197	316	489	530	3.436	1.781	6.50554e-08	2.38163e-06	up	SMEL3Ch03	91913487	91914194	-	SMEL_003g194890.1.01	--	K06950 uncharacterized protein | (RefSeq) uncharacterized protein YpgQ (A)	PREDICTED: uncharacterized protein YpgQ [Solanum tuberosum]	--	SubName: Full=uncharacterized protein YpgQ-like {ECO:0000313|RefSeq:XP_016459830.1, ECO:0000313|RefSeq:XP_016459832.1};	--	--	HD domain
SMEL_003g194960.1	32.1	77.38	19.5	11.1	18.91	6.19	645	1728	384	208	398	115	0.314	-1.67	0.000731327	0.0063485	down	SMEL3Ch03	92021991	92026218	-	SMEL_003g194960.1.01	--	--	hypothetical protein CQW23_31109 [Capsicum baccatum]	--	SubName: Full=Uncharacterized protein {ECO:0000313|EMBL:PHT29307.1};	--	--	NADH-ubiquinone reductase complex 1 MLRQ subunit
SMEL_003g195260.1	10.61	10.41	11.05	35.87	42.62	39.56	479	522	489	1510	2015	1651	4.054	2.019	4.80612e-38	1.98118e-34	up	SMEL3Ch03	92467151	92474198	-	SMEL_003g195260.1.01	--	K01052 lysosomal acid lipase/cholesteryl ester hydrolase [EC:3.1.1.13] | (RefSeq) hypothetical protein (A)	PREDICTED: uncharacterized protein LOC107014912 [Solanum pennellii]	RecName: Full=Triacylglycerol lipase 2; EC=3.1.1.3; Flags: Precursor;	SubName: Full=Uncharacterized protein {ECO:0000313|EnsemblPlants:Solyc03g119720.2.1};	Triglyceride lipase-cholesterol esterase	GO:0005576,extracellular region; GO:0016298,lipase activity; GO:0004806,triglyceride lipase activity; GO:0002213,defense response to insect; GO:0016042,lipid catabolic process	Partial alpha/beta-hydrolase lipase region
SMEL_003g195280.1	0.14	0.18	0.14	1.1	0.59	0.66	2	3	2	15	9	9	5.57	2.478	0.00327866	0.0208312	up	SMEL3Ch03	92480382	92483007	+	SMEL_003g195280.1.01	--	K00558 DNA (cytosine-5)-methyltransferase 1 [EC:2.1.1.37] | (RefSeq) DNA (cytosine-5)-methyltransferase CMT2-like (A)	tRNA modification GTPase MnmE [Capsicum annuum]	--	SubName: Full=tRNA modification GTPase MnmE {ECO:0000313|EMBL:PHT84174.1};	--	--	--
SMEL_003g195790.1	12.56	17.83	37.78	34.94	43.9	59.35	178	281	525	462	652	778	2.193	1.133	0.00774462	0.040299	up	SMEL3Ch03	92947541	92948412	-	SMEL_003g195790.1.01	--	K04733 interleukin-1 receptor-associated kinase 4 [EC:2.7.11.1] | (RefSeq) LEAF RUST 10 DISEASE-RESISTANCE LOCUS RECEPTOR-LIKE PROTEIN KINASE-like 1.2 isoform X1 (A)	PREDICTED: probable serine/threonine-protein kinase At1g18390 isoform X2 [Solanum tuberosum]	RecName: Full=LEAF RUST 10 DISEASE-RESISTANCE LOCUS RECEPTOR-LIKE PROTEIN KINASE-like 1.2 {ECO:0000303|PubMed:12805585}; EC=2.7.11.1; AltName: Full=Probable receptor-like serine/threonine-protein kinase LRK10L-1.2 {ECO:0000305}; Flags: Precursor;	SubName: Full=Uncharacterized protein {ECO:0000313|EnsemblPlants:PGSC0003DMT400014678};	Serine/threonine protein kinase	GO:0016021,integral component of membrane; GO:0005886,plasma membrane; GO:0005524,ATP binding; GO:0030247,polysaccharide binding; GO:0004674,protein serine/threonine kinase activity; GO:0007166,cell surface receptor signaling pathway; GO:0071215,cellular response to abscisic acid stimulus; GO:0042631,cellular response to water deprivation; GO:0048573,photoperiodism, flowering	Wall-associated receptor kinase C-terminal
SMEL_003g195800.1	2.85	3.94	5.57	1.46	1.44	1.39	151	232	289	72	80	68	0.377	-1.406	1.09694e-05	0.000210122	down	SMEL3Ch03	92952221	92958039	+	SMEL_003g195800.1.01	--	K11498 centromeric protein E | (RefSeq) kinesin-like protein NACK1 (A)	PREDICTED: kinesin-like protein NACK1 [Solanum pennellii]	RecName: Full=Kinesin-like protein NACK1; AltName: Full=NPK1-activating kinesin-1;	RecName: Full=Kinesin-like protein {ECO:0000256|RuleBase:RU000394};	Kinesin-like protein	GO:0005874,microtubule; GO:0005634,nucleus; GO:0009524,phragmoplast; GO:0005524,ATP binding; GO:0008017,microtubule binding; GO:0003777,microtubule motor activity; GO:0000919,cell plate assembly; GO:0007018,microtubule-based movement	Kinesin motor domain
SMEL_003g195930.1	6.36	8	1.25	0.35	0.07	0.31	176	246	34	9	2	8	0.052	-4.26	1.14531e-09	6.81169e-08	down	SMEL3Ch03	93048404	93051053	+	SMEL_003g195930.1.01	--	K05909 laccase [EC:1.10.3.2] | (RefSeq) laccase-1 (A)	PREDICTED: laccase-1 [Solanum tuberosum]	RecName: Full=Laccase-1; EC=1.10.3.2; AltName: Full=Benzenediol:oxygen oxidoreductase 1; AltName: Full=Diphenol oxidase 1; AltName: Full=Urishiol oxidase 1; Flags: Precursor;	RecName: Full=Laccase {ECO:0000256|RuleBase:RU361119}; EC=1.10.3.2 {ECO:0000256|RuleBase:RU361119}; AltName: Full=Benzenediol:oxygen oxidoreductase {ECO:0000256|RuleBase:RU361119}; AltName: Full=Diphenol oxidase {ECO:0000256|RuleBase:RU361119}; AltName: Full=Urishiol oxidase {ECO:0000256|RuleBase:RU361119};	Multicopper oxidases	GO:0048046,apoplast; GO:0005507,copper ion binding; GO:0052716,hydroquinone:oxygen oxidoreductase activity; GO:0016722,oxidoreductase activity, oxidizing metal ions; GO:0046274,lignin catabolic process	Multicopper oxidase
SMEL_003g195940.1	38.59	34.04	19.79	12.66	11	13.81	559	548	281	171	167	185	0.452	-1.146	7.05678e-06	0.000143439	down	SMEL3Ch03	93056638	93059282	+	SMEL_003g195940.1.01	--	K17964 leucine-rich PPR motif-containing protein, mitochondrial | (RefSeq) uncharacterized LOC101506267 (A)	PREDICTED: uncharacterized GPI-anchored protein At4g28100 isoform X1 [Solanum pennellii]	RecName: Full=Uncharacterized GPI-anchored protein At4g28100; Flags: Precursor;	SubName: Full=Uncharacterized protein {ECO:0000313|EnsemblPlants:PGSC0003DMT400014408};	--	GO:0031225,anchored component of membrane; GO:0046658,anchored component of plasma membrane	--
SMEL_003g195990.1	131.64	138.94	100.37	65.09	56.48	44.54	4792	5621	3581	2210	2154	1499	0.494	-1.017	5.10351e-09	2.54078e-07	down	SMEL3Ch03	93085980	93091426	-	SMEL_003g195990.1.01	--	K10529 alpha-dioxygenase [EC:1.14.99.-] | (RefSeq) alpha-dioxygenase 2 (A)	PREDICTED: alpha-dioxygenase 2 [Solanum tuberosum]	RecName: Full=Alpha-dioxygenase 2; Short=Alpha DOX2; EC=1.14.99.-; AltName: Full=Fatty acid dioxygenase AlphaDOX2; Flags: Precursor;	SubName: Full=Uncharacterized protein {ECO:0000313|EnsemblPlants:PGSC0003DMT400014713};	Peroxidase/oxygenase	GO:0051213,dioxygenase activity; GO:0020037,heme binding; GO:0046872,metal ion binding; GO:0004601,peroxidase activity; GO:0006631,fatty acid metabolic process; GO:0010150,leaf senescence; GO:0001676,long-chain fatty acid metabolic process; GO:0031408,oxylipin biosynthetic process; GO:0006979,response to oxidative stress	Animal haem peroxidase
SMEL_003g196220.1	25.31	28.76	36.88	12.22	13.04	13.69	502	634	717	226	271	251	0.468	-1.094	1.87679e-06	4.54553e-05	down	SMEL3Ch03	93312767	93314989	-	SMEL_003g196220.1.01	--	K04733 interleukin-1 receptor-associated kinase 4 [EC:2.7.11.1] | (RefSeq) G-type lectin S-receptor-like serine/threonine-protein kinase At1g67520 (A)	PREDICTED: thaumatin-like protein [Solanum tuberosum]	RecName: Full=Thaumatin-like protein; Flags: Precursor;	SubName: Full=Uncharacterized protein {ECO:0000313|EnsemblPlants:PGSC0003DMT400014747};	--	--	Thaumatin family
SMEL_003g196240.1	10.53	9.35	3.67	2.43	1.63	1.65	228	225	78	49	37	33	0.27	-1.889	1.95632e-06	4.716e-05	down	SMEL3Ch03	93339677	93341243	+	SMEL_003g196240.1.01	--	K07375 tubulin beta | (RefSeq) tubulin beta chain-like (A)	PREDICTED: tubulin beta chain-like [Solanum lycopersicum]	RecName: Full=Tubulin beta-2 chain; AltName: Full=Beta-2-tubulin;	RecName: Full=Tubulin beta chain {ECO:0000256|RuleBase:RU000352};	Beta tubulin	GO:0005737,cytoplasm; GO:0005874,microtubule; GO:0005525,GTP binding; GO:0003924,GTPase activity; GO:0005200,structural constituent of cytoskeleton; GO:0007017,microtubule-based process	Tubulin/FtsZ family, GTPase domain
SMEL_003g196280.1	56.58	48.46	33.73	15.16	22.61	18.76	688	655	402	172	288	211	0.454	-1.139	2.55408e-06	5.94156e-05	down	SMEL3Ch03	93381612	93383652	-	SMEL_003g196280.1.01	--	K01537 Ca2+-transporting ATPase [EC:3.6.3.8] | (RefSeq) calcium-transporting ATPase 2, plasma membrane-type isoform X1 (A)	C2-domain ABA-related family protein [Solanum lycopersicum]	RecName: Full=Protein C2-DOMAIN ABA-RELATED 5 {ECO:0000303|PubMed:25465408};	SubName: Full=Uncharacterized protein {ECO:0000313|EnsemblPlants:Solyc03g118710.2.1};	Predicted Ca2+-dependent phospholipid-binding protein	GO:0005634,nucleus; GO:0005886,plasma membrane; GO:0005096,GTPase activator activity; GO:0046872,metal ion binding; GO:0005543,phospholipid binding; GO:0009738,abscisic acid-activated signaling pathway; GO:0009789,positive regulation of abscisic acid-activated signaling pathway; GO:0043547,positive regulation of GTPase activity	C2 domain
SMEL_003g196440.1	83.36	77.63	168.5	203.47	261.49	276.5	2121	2195	4202	4829	6970	6505	2.438	1.286	0.000182064	0.00211768	up	SMEL3Ch03	93538890	93542268	-	SMEL_003g196440.1.01	--	K13464 jasmonate ZIM domain-containing protein | (RefSeq) PPS3; protein TIFY 6B-like (A)	uncharacterized protein LOC102589610 [Solanum tuberosum]	RecName: Full=Protein TIFY 6B; AltName: Full=Jasmonate ZIM domain-containing protein 3; AltName: Full=Protein JASMONATE INSENSITIVE 3;	SubName: Full=Uncharacterized protein PPS3 {ECO:0000313|EMBL:BAD04851.1};	--	GO:0005634,nucleus; GO:0042802,identical protein binding; GO:0003714,transcription corepressor activity; GO:0006952,defense response; GO:0009867,jasmonic acid mediated signaling pathway; GO:1903507,negative regulation of nucleic acid-templated transcription; GO:0031347,regulation of defense response; GO:2000022,regulation of jasmonic acid mediated signaling pathway; GO:0006355,regulation of trans…	tify domain
SMEL_003g196970.1	8.15	5.85	4.46	12.8	21.09	11.6	282	225	151	413	764	371	2.74	1.454	1.20982e-06	3.10919e-05	up	SMEL3Ch03	94230981	94234753	-	SMEL_003g196970.1.01	--	--	PREDICTED: uncharacterized protein LOC101267789 [Solanum lycopersicum]	--	SubName: Full=Uncharacterized protein {ECO:0000313|EnsemblPlants:Solyc03g123750.2.1};	Predicted lipase	GO:0016021,integral component of membrane; GO:0016787,hydrolase activity; GO:0006629,lipid metabolic process	Lipase (class 3)
SMEL_003g197020.1	4.09	5.32	2.47	1.14	1.16	0.49	27	39	16	7	8	3	0.261	-1.938	0.00119936	0.00951864	down	SMEL3Ch03	94259470	94259929	+	SMEL_003g197020.1.01	--	--	hypothetical protein T459_10993 [Capsicum annuum]	--	SubName: Full=Uncharacterized protein {ECO:0000313|EMBL:PHT88887.1};	--	--	--
SMEL_003g197130.1	41.45	45.67	28.69	11.77	11.44	11.51	370	453	251	98	107	95	0.333	-1.588	9.03068e-14	1.22455e-11	down	SMEL3Ch03	94332304	94332980	+	SMEL_003g197130.1.01	--	--	PREDICTED: uncharacterized protein LOC102589409 [Solanum tuberosum]	--	SubName: Full=Uncharacterized protein {ECO:0000313|EnsemblPlants:PGSC0003DMT400023716};	--	--	--
SMEL_003g197160.1	32.55	32.2	17.8	16.2	7.9	9.73	181	199	97	84	46	50	0.452	-1.144	0.000808285	0.00688981	down	SMEL3Ch03	94359710	94360051	+	SMEL_003g197160.1.01	--	K14488 SAUR family protein | (RefSeq) auxin-responsive protein SAUR71-like (A)	PREDICTED: auxin-responsive protein SAUR71-like [Solanum lycopersicum]	RecName: Full=Auxin-responsive protein SAUR71 {ECO:0000305}; AltName: Full=Protein SMALL AUXIN UP RNA 71 {ECO:0000303|PubMed:12036261};	SubName: Full=Uncharacterized protein {ECO:0000313|EnsemblPlants:Solyc03g123550.1.1};	--	GO:0005737,cytoplasm; GO:0009734,auxin-activated signaling pathway; GO:0007275,multicellular organism development; GO:0040008,regulation of growth	Auxin responsive protein
SMEL_003g197170.1	36.41	81.79	26.59	5.74	8.21	8.07	415	1036	297	61	98	85	0.171	-2.551	1.13992e-10	8.17548e-09	down	SMEL3Ch03	94361442	94362238	+	SMEL_003g197170.1.01	--	K13993 HSP20 family protein | (RefSeq) 17.4 kDa class III heat shock protein (A)	17.4 kDa class III heat shock protein [Capsicum baccatum]	RecName: Full=17.4 kDa class III heat shock protein; AltName: Full=17.4 kDa heat shock protein 2; Short=AtHsp17.4B;	SubName: Full=17.4 kDa class III heat shock protein {ECO:0000313|EMBL:PHT47249.1};	Molecular chaperone (small heat-shock protein Hsp26/Hsp42)	GO:0005737,cytoplasm; GO:0009408,response to heat; GO:0009644,response to high light intensity; GO:0042542,response to hydrogen peroxide	Hsp20/alpha crystallin family
SMEL_003g197200.1	0.59	0.49	2.82	9.09	20.21	26.57	13	12	61	187	467	542	15.344	3.94	2.03405e-05	0.000352904	up	SMEL3Ch03	94389262	94391849	-	SMEL_003g197200.1.01	--	K00679 phospholipid:diacylglycerol acyltransferase [EC:2.3.1.158] | (RefSeq) hypothetical protein (A)	GDSL esterase/lipase 5 [Capsicum baccatum]	RecName: Full=GDSL esterase/lipase 5; EC=3.1.1.-; AltName: Full=Extracellular lipase 5; Flags: Precursor;	SubName: Full=GDSL esterase/lipase 5 {ECO:0000313|EMBL:PHT47252.1};	--	GO:0005576,extracellular region; GO:0016298,lipase activity; GO:0016042,lipid catabolic process	GDSL-like Lipase/Acylhydrolase
SMEL_003g197270.1	7.17	10.36	14.32	25.66	22.17	18.57	71	114	139	237	230	170	2.264	1.179	0.000144933	0.00175889	up	SMEL3Ch03	94436199	94437419	-	SMEL_003g197270.1.01	--	--	PREDICTED: uncharacterized protein LOC102593752 [Solanum tuberosum]	RecName: Full=Protein MARD1 {ECO:0000303|PubMed:15159630}; AltName: Full=Mediator of ABA-regulated dormancy1 {ECO:0000303|PubMed:15159630}; AltName: Full=Senescence-associated protein SAG102 {ECO:0000303|PubMed:11402199};	SubName: Full=Putative ovule protein {ECO:0000313|EMBL:JAP16504.1};	--	GO:0010494,cytoplasmic stress granule; GO:0000932,P-body; GO:0046872,metal ion binding; GO:0009737,response to abscisic acid; GO:0010162,seed dormancy process	zinc-finger of the FCS-type, C2-C2
SMEL_003g197320.1	22.81	24.83	14.27	10.93	5.93	4.8	602	728	369	269	164	117	0.385	-1.375	1.55138e-05	0.00028098	down	SMEL3Ch03	94483144	94484766	+	SMEL_003g197320.1.01	--	K14494 DELLA protein | (RefSeq) DELLA protein RGL2 (A)	PREDICTED: nodulation-signaling pathway 1 protein-like [Solanum tuberosum]	RecName: Full=Nodulation-signaling pathway 1 protein;	SubName: Full=Uncharacterized protein {ECO:0000313|EnsemblPlants:PGSC0003DMT400089692};	--	GO:0005634,nucleus; GO:0042446,hormone biosynthetic process; GO:0009877,nodulation; GO:2000032,regulation of secondary shoot formation; GO:0006355,regulation of transcription, DNA-templated; GO:0006351,transcription, DNA-templated	GRAS domain family
SMEL_003g197390.1	19.18	13.55	12.17	6.24	3.53	5.38	135	106	84	41	26	35	0.372	-1.428	1.12872e-05	0.000215208	down	SMEL3Ch03	94552420	94552852	-	SMEL_003g197390.1.01	--	--	PREDICTED: uncharacterized protein LOC104646524 [Solanum lycopersicum]	--	SubName: Full=uncharacterized protein LOC107861668 {ECO:0000313|RefSeq:XP_016562462.1};	--	--	Interleukin 32
SMEL_003g197590.1	0.76	0.99	0.69	0.38	0.24	0.1	55	80	49	26	18	7	0.326	-1.617	0.000352928	0.00356578	down	SMEL3Ch03	94748029	94756572	-	SMEL_003g197590.1.01	--	K05658 ATP-binding cassette, subfamily B (MDR/TAP), member 1 [EC:3.6.3.44] | (RefSeq) ABC transporter B family member 19-like (A)	PREDICTED: ABC transporter B family member 19-like [Solanum pennellii]	RecName: Full=ABC transporter B family member 19; Short=ABC transporter ABCB.19; Short=AtABCB19; AltName: Full=Multidrug resistance protein 11; AltName: Full=P-glycoprotein 19;	SubName: Full=Uncharacterized protein {ECO:0000313|EnsemblPlants:PGSC0003DMT400058977};	Multidrug/pheromone exporter, ABC superfamily	GO:0016021,integral component of membrane; GO:0005886,plasma membrane; GO:0005524,ATP binding; GO:0042626,ATPase activity, coupled to transmembrane movement of substances; GO:0010329,auxin efflux transmembrane transporter activity; GO:0010541,acropetal auxin transport; GO:0043481,anthocyanin accumulation in tissues in response to UV light; GO:0009926,auxin polar transport; GO:0060918,auxin transp…	ABC transporter transmembrane region
SMEL_003g197770.1	5.97	5.82	7.32	10.89	18.64	9.52	84	91	101	143	275	124	2.246	1.167	0.000301931	0.00315276	up	SMEL3Ch03	94935322	94938823	-	SMEL_003g197770.1.01	--	K00599 methyltransferase-like protein 6 [EC:2.1.1.-] | (RefSeq) uncharacterized methyltransferase C3H7.11-like (A)	hypothetical protein BC332_09593 [Capsicum chinense]	--	RecName: Full=Methyltransferase-like protein {ECO:0000256|PIRNR:PIRNR037755}; EC=2.1.1.- {ECO:0000256|PIRNR:PIRNR037755};	Predicted methyltransferase	--	Methyltransferase domain
SMEL_003g197840.1	0.17	0.04	0.02	0.22	0.44	0.46	11	3	1	13	29	27	5.459	2.449	0.00175645	0.0128975	up	SMEL3Ch03	94994358	94999184	-	SMEL_003g197840.1.01	--	K01530 phospholipid-translocating ATPase [EC:3.6.3.1] | (RefSeq) probable phospholipid-transporting ATPase 4 (A)	PREDICTED: probable phospholipid-transporting ATPase 4 [Solanum tuberosum]	RecName: Full=Probable phospholipid-transporting ATPase 4 {ECO:0000303|PubMed:11402198}; Short=AtALA4 {ECO:0000303|PubMed:11402198}; EC=3.6.3.1 {ECO:0000305|PubMed:11402198}; AltName: Full=Aminophospholipid flippase 4 {ECO:0000303|PubMed:11402198};	RecName: Full=Phospholipid-transporting ATPase {ECO:0000256|RuleBase:RU362033}; EC=3.6.3.1 {ECO:0000256|RuleBase:RU362033};	P-type ATPase	GO:0000139,Golgi membrane; GO:0016021,integral component of membrane; GO:0005886,plasma membrane; GO:0005802,trans-Golgi network; GO:0005524,ATP binding; GO:0000287,magnesium ion binding; GO:0004012,phospholipid-translocating ATPase activity; GO:0048194,Golgi vesicle budding	Phospholipid-translocating P-type ATPase C-terminal
SMEL_003g198100.1	4.44	3.28	2.31	1.16	1.13	0.64	45	37	23	11	12	6	0.325	-1.622	0.00105006	0.00856122	down	SMEL3Ch03	95251262	95251885	-	SMEL_003g198100.1.01	--	--	PREDICTED: uncharacterized protein LOC107013069 [Solanum pennellii]	--	SubName: Full=Uncharacterized protein {ECO:0000313|EnsemblPlants:Solyc03g121550.2.1};	--	GO:0016021,integral component of membrane	--
SMEL_003g198250.1	8.42	17.06	12.78	3.97	3.44	4.06	166	374	247	73	71	74	0.329	-1.603	1.63823e-07	5.36812e-06	down	SMEL3Ch03	95391981	95393714	-	SMEL_003g198250.1.01	--	K13248 pyridoxal phosphate phosphatase PHOSPHO2 [EC:3.1.3.74] | (RefSeq) inorganic pyrophosphatase 1-like (A)	PREDICTED: inorganic pyrophosphatase 1-like [Solanum tuberosum]	RecName: Full=Inorganic pyrophosphatase 1; Short=AtPPsPase1; Short=PPi phosphatase 1; Short=Pyrophosphate-specific phosphatase 1; EC=3.6.1.1; AltName: Full=Protein PHOSPHATE STARVATION-INDUCED GENE 2; Short=AtPS2;	SubName: Full=Uncharacterized protein {ECO:0000313|EnsemblPlants:Solyc03g121420.2.1};	Predicted haloacid dehalogenase-like hydrolase	GO:0004427,inorganic diphosphatase activity; GO:0046872,metal ion binding; GO:0016791,phosphatase activity; GO:0016462,pyrophosphatase activity; GO:0016036,cellular response to phosphate starvation; GO:0051262,protein tetramerization	Putative Phosphatase
SMEL_003g198320.1	12.73	23.11	26.45	8.08	11.92	5.61	54	109	110	32	53	22	0.449	-1.154	0.00661798	0.0359607	down	SMEL3Ch03	95482737	95482997	-	SMEL_003g198320.1.01	--	--	hypothetical protein A4A49_24202 [Nicotiana attenuata]	--	SubName: Full=Uncharacterized protein {ECO:0000313|EnsemblPlants:Solyc03g121340.1.1};	--	--	--
SMEL_003g198530.1	28.26	24.3	20.32	10.99	12.27	7.56	1354	1294	954	491	616	335	0.467	-1.098	1.85649e-07	5.99752e-06	down	SMEL3Ch03	95633720	95640804	+	SMEL_003g198530.1.01	--	K17710 pentatricopeptide repeat domain-containing protein 1 | (RefSeq) hypothetical protein (A)	PREDICTED: pentatricopeptide repeat-containing protein At1g51965, mitochondrial [Solanum pennellii]	RecName: Full=Pentatricopeptide repeat-containing protein At1g51965, mitochondrial; Flags: Precursor;	SubName: Full=Uncharacterized protein {ECO:0000313|EnsemblPlants:Solyc03g121110.2.1};	--	GO:0005739,mitochondrion; GO:0004519,endonuclease activity; GO:0003723,RNA binding; GO:0009737,response to abscisic acid; GO:0009451,RNA modification; GO:0008380,RNA splicing	PPR repeat family
SMEL_003g198550.1	3.25	4.54	7.38	2.24	1.47	1.64	120	186	267	77	57	56	0.381	-1.393	0.000227341	0.00252327	down	SMEL3Ch03	95651058	95653664	-	SMEL_003g198550.1.01	--	--	PREDICTED: uncharacterized protein LOC107015176 [Solanum pennellii]	--	SubName: Full=Uncharacterized protein {ECO:0000313|EnsemblPlants:PGSC0003DMT400006708};	--	--	--
SMEL_003g198650.1	32.49	31.83	66.49	84.53	105.53	152.24	2675	2913	5366	6493	9104	11592	2.845	1.508	4.38582e-05	0.000661758	up	SMEL3Ch03	95766321	95776102	-	SMEL_003g198650.1.01	--	K21396 ATP-binding cassette, subfamily G (WHITE), eye pigment precursor transporter | (RefSeq) LOC109739064; ABC transporter G family member 7 (A)	PREDICTED: ABC transporter G family member 36-like [Capsicum annuum]	RecName: Full=ABC transporter G family member 36; Short=ABC transporter ABCG.36; Short=AtABCG36; AltName: Full=Pleiotropic drug resistance protein 8; AltName: Full=Protein PENETRATION 3;	SubName: Full=ABC transporter G family member 36-like {ECO:0000313|RefSeq:XP_016562651.1};	Pleiotropic drug resistance proteins (PDR1-15), ABC superfamily	GO:0009507,chloroplast; GO:0009941,chloroplast envelope; GO:0016021,integral component of membrane; GO:0016020,membrane; GO:0005739,mitochondrion; GO:0005886,plasma membrane; GO:0005774,vacuolar membrane; GO:0005524,ATP binding; GO:0042626,ATPase activity, coupled to transmembrane movement of substances; GO:0015086,cadmium ion transmembrane transporter activity; GO:0015691,cadmium ion transport; …	ABC-2 type transporter
SMEL_003g198680.1	4.27	4.65	6.18	0.85	2.09	1.5	43	52	61	8	22	14	0.325	-1.621	0.000396303	0.00391573	down	SMEL3Ch03	95793591	95794523	-	SMEL_003g198680.1.01	--	--	PREDICTED: uncharacterized protein LOC107012885 [Solanum pennellii]	--	SubName: Full=Uncharacterized protein {ECO:0000313|EnsemblPlants:PGSC0003DMT400006733};	--	--	--
SMEL_003g198890.1	9.11	7.99	13.81	29.25	24.38	20.93	605	590	899	1812	1696	1285	2.613	1.386	2.51028e-07	7.78035e-06	up	SMEL3Ch03	95943458	95954311	-	SMEL_003g198890.1.01	--	K17925 sorting nexin-13 | (RefSeq) uncharacterized LOC102586355 (A)	PREDICTED: uncharacterized protein LOC102586355 isoform X1 [Solanum tuberosum]	--	SubName: Full=Uncharacterized protein {ECO:0000313|EnsemblPlants:Solyc03g120770.2.1};	Intermediate filament-like protein, sorting nexins, and related proteins containing PX (PhoX) domain(s)	GO:0016021,integral component of membrane; GO:0035091,phosphatidylinositol binding	PXA domain
SMEL_003g198980.1	8.54	11.15	4.36	0.92	1.22	2.54	40	58	20	4	6	11	0.217	-2.203	0.000213783	0.00239993	down	SMEL3Ch03	96026686	96027632	+	SMEL_003g198980.1.01	--	K10418 dynein light chain LC8-type | (RefSeq) dynein light chain 1, cytoplasmic-like (A)	PREDICTED: dynein light chain 1, cytoplasmic-like [Solanum pennellii]	RecName: Full=Dynein 8 kDa light chain, flagellar outer arm;	SubName: Full=Uncharacterized protein {ECO:0000313|EnsemblPlants:Solyc03g120690.2.1};	Dynein light chain type 1	GO:0005930,axoneme; GO:0097014,ciliary plasm; GO:0030286,dynein complex; GO:0005874,microtubule; GO:0031514,motile cilium; GO:0003774,motor activity; GO:0007017,microtubule-based process; GO:0044458,motile cilium assembly	Dynein light chain type 1
SMEL_003g199140.1	94.58	74.81	101.96	34.37	26.66	31.85	1307	1149	1381	443	386	407	0.375	-1.417	5.79504e-12	5.55542e-10	down	SMEL3Ch03	96146645	96148643	+	SMEL_003g199140.1.01	--	K09873 aquaporin TIP | (RefSeq) LOW QUALITY PROTEIN: aquaporin TIP2-1-like (A)	Aquaporin-like protein [Cynara cardunculus var. scolymus]	RecName: Full=Probable aquaporin TIP2-2; AltName: Full=Tonoplast intrinsic protein 2-2; Short=OsTIP2;2;	SubName: Full=Aquaporin-like protein {ECO:0000313|EMBL:KVH92951.1};	Aquaporin (major intrinsic protein family)	GO:0042807,central vacuole; GO:0005887,integral component of plasma membrane; GO:0009705,plant-type vacuole membrane; GO:0015250,water channel activity; GO:0034220,ion transmembrane transport	Major intrinsic protein
SMEL_003g199260.1	11.25	8.64	2.32	2.62	1.3	1.17	198	169	40	43	24	19	0.256	-1.967	0.000297866	0.00312116	down	SMEL3Ch03	96325763	96326845	+	SMEL_003g199260.1.01	--	K10443 kelch-like protein 2/3 | (RefSeq) F-box/kelch-repeat protein At1g16250-like isoform X1 (A)	PREDICTED: F-box/kelch-repeat protein At1g80440-like [Solanum tuberosum]	RecName: Full=F-box/kelch-repeat protein At1g80440;	SubName: Full=Uncharacterized protein {ECO:0000313|EnsemblPlants:PGSC0003DMT400006583};	FOG: Kelch repeat	GO:0005829,cytosol; GO:0019005,SCF ubiquitin ligase complex; GO:0031625,ubiquitin protein ligase binding; GO:0080037,negative regulation of cytokinin-activated signaling pathway; GO:0043161,proteasome-mediated ubiquitin-dependent protein catabolic process; GO:0042787,NA; GO:2000762,regulation of phenylpropanoid metabolic process; GO:0030162,regulation of proteolysis	Kelch motif
SMEL_003g199300.1	2.36	2.3	5.97	0.51	0.45	0.15	35	38	87	7	7	2	0.111	-3.166	2.12785e-06	5.08195e-05	down	SMEL3Ch03	96358044	96360332	+	SMEL_003g199300.1.01	--	--	PREDICTED: thionin-like protein 2 [Solanum tuberosum]	RecName: Full=Thionin-like protein 2; Flags: Precursor;	SubName: Full=Uncharacterized protein {ECO:0000313|EnsemblPlants:PGSC0003DMT400006829};	--	GO:0005576,extracellular region; GO:0006952,defense response	Cysteine-rich secretory protein family
SMEL_003g199630.1	1.52	2.66	2.44	0.63	0.5	0.59	73	142	115	28	25	26	0.282	-1.827	1.93619e-07	6.22572e-06	down	SMEL3Ch03	96639661	96646642	-	SMEL_003g199630.1.01	--	--	PREDICTED: uncharacterized protein LOC102583913 [Solanum tuberosum]	--	SubName: Full=Uncharacterized protein {ECO:0000313|EnsemblPlants:PGSC0003DMT400014553};	--	--	--
SMEL_003g199760.1	1.17	1.86	0.38	0.11	0.15	0	22	39	7	2	3	0	0.089	-3.495	0.00041552	0.00406661	down	SMEL3Ch03	96749127	96750772	+	SMEL_003g199760.1.01	--	K09286 EREBP-like factor | (RefSeq) ethylene-responsive transcription factor CRF5-like (A)	Ethylene-responsive transcription factor LEP [Capsicum annuum]	RecName: Full=Ethylene-responsive transcription factor RAP2-11; AltName: Full=Protein RELATED TO APETALA2 11;	SubName: Full=Ethylene-responsive transcription factor LEP {ECO:0000313|EMBL:PHT88725.1};	--	GO:0005634,nucleus; GO:0003700,DNA-binding transcription factor activity; GO:0043565,sequence-specific DNA binding; GO:0035865,cellular response to potassium ion; GO:0009873,ethylene-activated signaling pathway; GO:0048528,post-embryonic root development; GO:0009723,response to ethylene; GO:0000302,response to reactive oxygen species; GO:0006351,transcription, DNA-templated	AP2 domain
SMEL_003g199840.1	3.23	3.32	1.41	1.48	0.78	0.83	63	72	27	27	16	15	0.431	-1.216	0.00810349	0.0416615	down	SMEL3Ch03	96864054	96865350	+	SMEL_003g199840.1.01	--	K08869 aarF domain-containing kinase | (RefSeq) predicted protein (A)	PREDICTED: transcription factor DIVARICATA [Solanum tuberosum]	RecName: Full=Transcription factor SRM1 {ECO:0000305}; AltName: Full=Myb-related protein SRM1 {ECO:0000305}; AltName: Full=Protein SALT-RELATED MYB 1 {ECO:0000303|PubMed:26243618};	SubName: Full=Uncharacterized protein {ECO:0000313|EnsemblPlants:PGSC0003DMT400014350};	Zuotin and related molecular chaperones (DnaJ superfamily), contains DNA-binding domains	GO:0005634,nucleus; GO:0003677,DNA binding; GO:0003700,DNA-binding transcription factor activity; GO:0009738,abscisic acid-activated signaling pathway; GO:1901001,negative regulation of response to salt stress; GO:0010116,positive regulation of abscisic acid biosynthetic process; GO:1905615,positive regulation of developmental vegetative growth; GO:0045893,positive regulation of transcription, DN…	Myb-like DNA-binding domain
SMEL_004g200440.1	11.62	16.15	9.9	6.78	2.8	4.52	103	159	86	56	26	37	0.411	-1.284	0.000398014	0.00393075	down	SMEL3Ch04	891352	892149	-	SMEL_004g200440.1.01	--	K19041 E3 ubiquitin-protein ligase RNF38/44 [EC:2.3.2.27] | (RefSeq) RING-H2 finger protein ATL20-like (A)	PREDICTED: RING-H2 finger protein ATL20-like [Solanum tuberosum]	RecName: Full=RING-H2 finger protein ATL20; EC=2.3.2.27 {ECO:0000305}; AltName: Full=RING-type E3 ubiquitin transferase ATL20 {ECO:0000305};	SubName: Full=Uncharacterized protein {ECO:0000313|EnsemblPlants:PGSC0003DMT400019876};	FOG: Predicted E3 ubiquitin ligase	GO:0016021,integral component of membrane; GO:0046872,metal ion binding; GO:0061630,ubiquitin protein ligase activity; GO:0043161,proteasome-mediated ubiquitin-dependent protein catabolic process	Ring finger domain
SMEL_004g200500.1	27.41	19.51	16.59	10.17	8.3	7.56	627	496	372	217	199	160	0.453	-1.142	2.79694e-07	8.56579e-06	down	SMEL3Ch04	964139	965545	-	SMEL_004g200500.1.01	--	K22683 aspartyl protease family protein [EC:3.4.23.-] | (RefSeq) protein ASPARTIC PROTEASE IN GUARD CELL 2-like (A)	PREDICTED: protein ASPARTIC PROTEASE IN GUARD CELL 2-like [Solanum tuberosum]	RecName: Full=Aspartyl protease family protein 2 {ECO:0000305}; EC=3.4.23.- {ECO:0000305}; Flags: Precursor;	SubName: Full=Uncharacterized protein {ECO:0000313|EnsemblPlants:PGSC0003DMT400048585};	Aspartyl protease	GO:0016020,membrane; GO:0009505,plant-type cell wall; GO:0004190,aspartic-type endopeptidase activity; GO:0030163,protein catabolic process; GO:0006508,proteolysis; GO:0080167,response to karrikin	Xylanase inhibitor N-terminal
SMEL_004g200590.1	6.05	3.7	2.21	0.7	0.45	0.31	168	114	60	18	13	8	0.135	-2.888	7.67514e-10	4.77922e-08	down	SMEL3Ch04	1050409	1052712	-	SMEL_004g200590.1.01	--	K20619 cytochrome P450 family 78 subfamily A | (RefSeq) LOC109752924; cytochrome P450 78A9-like (A)	PREDICTED: cytochrome P450 78A6-like [Solanum tuberosum]	RecName: Full=Cytochrome P450 78A6; EC=1.14.-.-; AltName: Full=Protein ENHANCER OF DA1-1;	SubName: Full=Uncharacterized protein {ECO:0000313|EnsemblPlants:Solyc10g009310.2.1};	Cytochrome P450 CYP2 subfamily	GO:0016021,integral component of membrane; GO:0016020,membrane; GO:0020037,heme binding; GO:0005506,iron ion binding; GO:0016709,oxidoreductase activity, acting on paired donors, with incorporation or reduction of molecular oxygen, NAD(P)H as one donor, and incorporation of one atom of oxygen; GO:0040008,regulation of growth; GO:0044550,secondary metabolite biosynthetic process; GO:0048316,seed d…	Cytochrome P450
SMEL_004g200600.1	15.41	18.57	28.3	27.87	40.38	46.18	345	462	621	582	947	956	2.008	1.006	0.00164737	0.0122136	up	SMEL3Ch04	1082266	1083642	+	SMEL_004g200600.1.01	--	K13422 transcription factor MYC2 | (RefSeq) transcription factor MYC2-like (A)	PREDICTED: transcription factor MYC2-like [Solanum tuberosum]	RecName: Full=Transcription factor bHLH14; AltName: Full=Basic helix-loop-helix protein 14; Short=AtbHLH14; Short=bHLH 14; AltName: Full=Transcription factor EN 33; AltName: Full=bHLH transcription factor bHLH014;	SubName: Full=Uncharacterized protein {ECO:0000313|EnsemblPlants:PGSC0003DMT400014097};	--	GO:0005737,cytoplasm; GO:0005634,nucleus; GO:0003677,DNA binding; GO:0003700,DNA-binding transcription factor activity; GO:0046983,protein dimerization activity; GO:0010629,negative regulation of gene expression; GO:0006355,regulation of transcription, DNA-templated; GO:0006351,transcription, DNA-templated	bHLH-MYC and R2R3-MYB transcription factors N-terminal
SMEL_004g200620.1	17.85	17.27	13.57	32.55	31.13	33.62	585	629	436	995	1069	1019	2.212	1.145	2.00031e-16	4.04401e-14	up	SMEL3Ch04	1122890	1125156	+	SMEL_004g200620.1.01	--	K15397 3-ketoacyl-CoA synthase [EC:2.3.1.199] | (RefSeq) 3-ketoacyl-CoA synthase 1 (A)	PREDICTED: 3-ketoacyl-CoA synthase 1 [Solanum tuberosum]	RecName: Full=3-ketoacyl-CoA synthase 1 {ECO:0000303|PubMed:10074711}; Short=KCS-1 {ECO:0000303|PubMed:10074711}; EC=2.3.1.199 {ECO:0000269|PubMed:10074711, ECO:0000269|PubMed:16765910}; AltName: Full=Very long-chain fatty acid condensing enzyme 1 {ECO:0000303|PubMed:10074711}; Short=VLCFA condensing enzyme 1 {ECO:0000303|PubMed:10074711};	RecName: Full=3-ketoacyl-CoA synthase {ECO:0000256|PIRNR:PIRNR036417}; EC=2.3.1.- {ECO:0000256|PIRNR:PIRNR036417};	--	GO:0022626,cytosolic ribosome; GO:0005783,endoplasmic reticulum; GO:0005789,endoplasmic reticulum membrane; GO:0016021,integral component of membrane; GO:0016020,membrane; GO:0102336,3-oxo-arachidoyl-CoA synthase activity; GO:0102337,3-oxo-cerotoyl-CoA synthase activity; GO:0102338,3-oxo-lignoceronyl-CoA synthase activity; GO:0009922,fatty acid elongase activity; GO:0102756,very-long-chain 3-keto…	FAE1/Type III polyketide synthase-like protein
SMEL_004g200720.1	2.92	2.43	1.82	4.96	5.95	18.02	67	62	41	106	143	382	4.531	2.18	1.08349e-05	0.000208043	up	SMEL3Ch04	1279465	1282337	-	SMEL_004g200720.1.01	--	K13066 caffeic acid 3-O-methyltransferase [EC:2.1.1.68] | (RefSeq) caffeic acid 3-O-methyltransferase 1-like (A)	PREDICTED: caffeic acid 3-O-methyltransferase 1-like [Solanum tuberosum]	RecName: Full=Caffeic acid 3-O-methyltransferase 1; Short=CAOMT-1; Short=COMT-1; EC=2.1.1.68; AltName: Full=S-adenosysl-L-methionine:caffeic acid 3-O-methyltransferase 1;	SubName: Full=Putative caffeic acid 3-O-methyltransferase 1-like {ECO:0000313|EMBL:JAP27673.1};	Hydroxyindole-O-methyltransferase and related SAM-dependent methyltransferases	GO:0047763,caffeate O-methyltransferase activity; GO:0046983,protein dimerization activity; GO:0009809,lignin biosynthetic process	O-methyltransferase
[truncated: 1,283 more rows]

## Sheet: TableS2
TableS2 The DEGs of eggplant after inoculation the R.solanacearum in R-0h _Vs_R-48h.
ID	R0h-1_fpkm	R0h-2_fpkm	R0h-3_fpkm	R48h-1_fpkm	R48h-2_fpkm	R48h-3_fpkm	R0h-1_count	R0h-2_count	R0h-3_count	R48h-1_count	R48h-2_count	R48h-3_count	FoldChange	log2FoldChange	pvalue	padj	regulated	chr	start	end	strand	gene_name	gene_description	KEGG	NR	Swissprot	Tremble	KOG	GO	Pfam
[truncated: 1,416 more rows]

## Sheet: TableS3
Table S3 The DEGs of eggplant after inoculation the R.solanacearum in R-24h _Vs_R-48h.
[truncated: 1,033 more rows]
