# Supplementary material for: Transcriptome and metabolome response of eggplant against Ralstonia solanacearum infection
Source: PeerJ. 2023 Jan 11;11:e14658. doi: 10.7717/peerj.14658 (PMC9840387; doi:10.7717/peerj.14658)
Supplement: Supplemental Information 6 [file peerj-11-14658-s006.xls]

## Sheet: RNA_cluster
Table S5 The DEGs expression pattern of eggplant innoculation with R.solanacaerum
Gene ID	R0h	R24h	R48h	RNA_cluster
SMEL_001g115120.1	11.1833	7.78	4.9	7
SMEL_001g115170.1	43.09	34.5233	16.0933	7
SMEL_001g115380.1	7.55667	21.5467	16.1033	6
SMEL_001g115390.1	23.9467	60.3833	133.853	3
SMEL_001g115400.1	2.19667	0.423333	0.406667	2
SMEL_001g115460.1	48.3467	16.6467	42.2533	11
SMEL_001g115480.1	1.18	3.49	6.48333	3
SMEL_001g115580.1	0.78	0.18	0.07	2
SMEL_001g115760.1	37.7767	88.4067	61.79	5
SMEL_001g115770.1	332.46	625.363	576.057	6
SMEL_001g115880.1	1.70333	0.963333	0.703333	2
SMEL_001g115900.1	643.09	1258.47	1205.5	6
SMEL_001g115930.1	23.8067	13.9	9.52333	7
SMEL_001g115990.1	1.12333	0.343333	0.843333	11
SMEL_001g116000.1	14.14	6.1	9.64	1
SMEL_001g116060.1	42.0067	109.783	121.153	9
SMEL_001g116090.1	7.36667	2.96333	3.23	12
SMEL_001g116140.1	14.2067	26.1433	36.0267	9
SMEL_001g116200.1	100.533	67.18	33.0533	7
SMEL_001g116210.1	3.11333	6.25333	5.09333	6
SMEL_001g116270.1	0.436667	0.0566667	0.14	12
SMEL_001g116330.1	3.15333	6.78667	6.16333	6
SMEL_001g116340.1	3.95	6.69333	7.12	9
SMEL_001g116480.1	0.35	0.21	2.16667	3
SMEL_001g116500.1	120.533	38.03	92.23	11
SMEL_001g116780.1	40.0033	68.0133	75.1267	9
SMEL_001g116820.1	2.69333	1.16333	1.16333	2
SMEL_001g116900.1	5.52667	5.13333	10.0167	3
SMEL_001g117010.1	10.5333	6.17	13.15	8
SMEL_001g117220.1	59.0567	101.493	139.537	9
SMEL_001g117250.1	8.86333	9.46667	16.5767	3
SMEL_001g117300.1	17.1033	64.4833	62.5	6
SMEL_001g117310.1	297.837	35.5933	134.633	1
SMEL_001g117380.1	8.89667	26.24	25.0867	6
SMEL_001g117490.1	4.32667	0.863333	1.67333	12
SMEL_001g117600.1	101.107	40.1933	49.99	12
SMEL_001g117720.1	44.9133	14.6333	36.96	11
SMEL_001g117800.1	0.106667	0.25	1.26667	3
SMEL_001g117930.1	53.29	159.033	58.77	4
SMEL_001g117940.1	0.596667	0.98	1.71	3
SMEL_001g117990.1	96.8433	194.673	164.283	6
SMEL_001g118060.1	17.1233	37.4733	37.58	6
SMEL_001g118110.1	99.5	32.31	48.8367	12
SMEL_001g118120.1	1499.73	417.25	998	1
SMEL_001g118180.1	48.4133	18.2367	29.3133	1
SMEL_001g118190.1	3.72667	1.38	1.77333	12
SMEL_001g118230.1	19.5567	5.80333	9.14667	12
SMEL_001g118240.1	2.53333	1.11333	2.51333	8
SMEL_001g118410.1	15.0167	6.83667	13.5667	11
SMEL_001g118500.1	3.36	8.23	5.85667	6
SMEL_001g118540.1	3.11333	6.19667	1.05333	10
SMEL_001g118630.1	25.7533	41.8467	46.4767	9
SMEL_001g118660.1	19.6167	34.4367	48.84	9
SMEL_001g118700.1	6.03667	1.43	3.44	1
SMEL_001g118760.1	10.5767	27.17	13.2167	4
SMEL_001g118780.1	2.05	2.54667	1.01333	10
SMEL_001g118930.1	3.17667	2.44667	0.93	7
SMEL_001g118980.1	27.0433	9.69	16.9667	1
SMEL_001g119010.1	29.8667	81.2333	114.97	9
SMEL_001g119120.1	66.2333	81.57	121.153	3
SMEL_001g119400.1	13.3933	6.03333	2.57333	7
SMEL_001g119440.1	3.59667	0.773333	3.04	11
SMEL_001g119550.1	6.05667	15.0867	10.4	5
SMEL_001g119590.1	22.3233	22.41	54.74	3
SMEL_001g119670.1	127.45	195.507	256.423	9
SMEL_001g119680.1	9.87667	20.3233	40.12	3
SMEL_001g119830.1	0.846667	0.146667	0.866667	8
SMEL_001g119880.1	38.93	6.51333	23.5467	1
SMEL_001g119900.1	13.1967	2.96333	7.5	1
SMEL_001g119960.1	1.62	0.643333	1.57667	8
SMEL_001g120030.1	2.27333	8.25	11.3167	9
SMEL_001g120300.1	0.903333	3.81667	1.53667	5
SMEL_001g120310.1	16.64	21.78	38.3433	3
SMEL_001g120320.1	0.993333	0.11	0.0933333	2
SMEL_001g120410.1	58.3	124.103	120.71	6
SMEL_001g120420.1	25.0167	54.0467	41.9833	6
SMEL_001g120560.1	0.896667	0.183333	1.36333	8
SMEL_001g120600.1	1.94667	0.68	1.05667	1
SMEL_001g120740.1	0.786667	0.58	0.216667	7
SMEL_001g120790.1	4.76667	8.58667	3.68333	4
SMEL_001g120900.1	7.50333	14.2567	11.46	6
SMEL_001g121000.1	1.68	0.213333	0.16	2
SMEL_001g121010.1	40.7133	115.36	68.7467	5
SMEL_001g121030.1	1.44	0.496667	0.373333	2
SMEL_001g121150.1	115.92	53.8533	46.9767	2
SMEL_001g121250.1	3.28	0.83	1.15333	12
SMEL_001g121280.1	2.39333	4.6	2.74667	4
SMEL_001g121340.1	0.643333	2.56333	0.676667	4
SMEL_001g121350.1	10.16	16.3133	7.71	10
SMEL_001g121520.1	8.86	34.3267	8.49333	4
SMEL_001g121530.1	2.15	6.32667	1.23	4
SMEL_001g121540.1	1.22	6.8	1.33	4
SMEL_001g121550.1	0.456667	3.75333	0.823333	4
SMEL_001g121560.1	34.1167	129.783	35.1033	4
SMEL_001g121640.1	0.276667	2.95	0.97	5
SMEL_001g121720.1	2.81333	0.716667	1.94333	11
SMEL_001g122270.1	4.05667	0.923333	0.886667	2
SMEL_001g122310.1	8	9.48333	15.1233	3
SMEL_001g122520.1	133.703	274.433	213.41	6
SMEL_001g122570.1	33.7133	82.82	88.2267	9
SMEL_001g123080.1	5.67667	17.4	3.03333	4
SMEL_001g123170.1	44.0167	3.51667	20.7633	1
SMEL_001g123230.1	4.50667	1.92	6.40667	8
SMEL_001g123240.1	0.783333	3.99333	3.08333	6
SMEL_001g123260.1	3.37667	0.843333	3.33	8
SMEL_001g123270.1	73.82	33.3567	69.6433	11
SMEL_001g123320.1	7.09667	6.52	2.17	7
SMEL_001g123590.1	0.82	0.28	0.576667	1
SMEL_001g123620.1	161.317	322.907	326.253	9
SMEL_001g123750.1	36.61	44.9867	71.0567	3
SMEL_001g123790.1	5.50333	0.596667	0.263333	2
SMEL_001g123810.1	3.96	5.93	2.82667	10
SMEL_001g123870.1	589.793	1134.56	839.337	5
SMEL_001g123920.1	3.22	1.23	2.29667	1
SMEL_001g123930.1	15.2533	6.82	14.1733	11
SMEL_001g123980.1	87.5467	125.767	165.863	9
SMEL_001g124150.1	9.58333	21.6167	15.4533	5
SMEL_001g124160.1	4.07667	1.22667	3.28	11
SMEL_001g124170.1	8.04667	2.22	2.44667	12
SMEL_001g124180.1	8.10333	1.83	7.19333	11
SMEL_001g124190.1	3.91	1.32	4.43667	8
SMEL_001g124580.1	47.1067	19.25	30.8033	1
SMEL_001g124700.1	110.673	177.277	411.21	3
SMEL_001g124860.1	23.5933	10.2	6.24	2
SMEL_001g124960.1	57.9767	99.3267	131.703	9
SMEL_001g124980.1	9.27667	29.88	7.51	4
SMEL_001g125030.1	18.5367	36.5467	26.2533	5
SMEL_001g125040.1	17.2767	7.74333	16.2633	11
SMEL_001g125060.1	8.82667	18.11	13.6	6
SMEL_001g125070.1	0.843333	4.30667	3.65333	6
SMEL_001g125080.1	10.12	5.36	2.89667	7
SMEL_001g125120.1	0.616667	1.52	1.41667	6
SMEL_001g125210.1	764.11	278.903	203.533	2
SMEL_001g125270.1	2.01333	0.913333	0.713333	2
SMEL_001g125460.1	14.4867	5.54	10.74	11
SMEL_001g125820.1	4.50333	6.95	13.4633	3
SMEL_001g125910.1	1.13333	1.32667	2.42	3
SMEL_001g126060.1	0.436667	1.44333	1.53667	9
SMEL_001g126080.1	0.386667	1.45	0.366667	4
SMEL_001g126170.1	288.643	505.17	555.313	9
SMEL_001g126300.1	2.71	5.32333	3.71667	5
SMEL_001g126530.1	1.77333	0.78	1.46667	11
SMEL_001g126550.1	20.2833	14.13	3.64	7
SMEL_001g126670.1	91.0333	37.9433	82.45	11
SMEL_001g126700.1	152.697	333.403	278.467	6
SMEL_001g126750.1	2.99333	7.35667	30.43	3
SMEL_001g126760.1	66.4433	99.8133	138.583	3
SMEL_001g126780.1	21.0667	9.13	21.5667	8
SMEL_001g126800.1	453.837	945.577	933.6	6
SMEL_001g126900.1	4.45667	3.05333	1.70667	7
SMEL_001g127130.1	12.8833	156.157	39.5433	5
SMEL_001g127140.1	9.95	21.8133	9.26667	4
SMEL_001g127150.1	27.36	158.81	74.9467	5
SMEL_001g127160.1	6.61667	23.2133	9.20667	4
SMEL_001g127230.1	1.55	0.253333	0.106667	2
SMEL_001g127250.1	7.32	10.8133	15.23	3
SMEL_001g127380.1	13.1533	6.20333	17.4667	8
SMEL_001g127560.1	0.13	3.02333	0.92	5
SMEL_001g127650.1	9.11	3	2.41	2
SMEL_001g127750.1	1.15333	0.45	1.05333	11
SMEL_001g127900.1	0.93	1.70667	1.54333	6
SMEL_001g127940.1	1.69667	0.0966667	0.106667	2
SMEL_001g127960.1	44.87	86.0233	59.5867	5
SMEL_001g127990.1	0.793333	0.453333	1.36333	8
SMEL_001g128000.1	4.06667	1.80333	1.98	12
SMEL_001g128100.1	16.9333	28.3833	7.06	10
SMEL_001g128250.1	2.92333	5.56667	1.88333	10
SMEL_001g128270.1	34.88	56.3367	64.58	9
SMEL_001g128280.1	61.2867	32.42	25.1133	2
SMEL_001g128290.1	4.61	7.72333	2.41	10
SMEL_001g128440.1	20.0667	30.23	40.8733	9
SMEL_001g128480.1	7.63667	4.52	10.64	8
SMEL_001g128530.1	4.35333	1.07667	0.94	2
SMEL_001g128600.1	96.7667	41.8933	67.58	1
SMEL_001g128620.1	43.67	77.2833	82.51	9
SMEL_001g128680.1	25.67	10.8133	14.1267	12
SMEL_001g128710.1	15.3933	37.4433	32.7167	6
SMEL_001g128900.1	11.1	21.8967	10.8467	4
SMEL_001g128950.1	5.45667	0.37	0.896667	12
SMEL_001g128990.1	1.64667	0.15	1.35	11
SMEL_001g129000.1	0.373333	0.01	0.283333	11
SMEL_001g129060.1	96.7967	62.2833	22.4967	7
SMEL_001g129070.1	0.48	0.286667	0.07	7
SMEL_001g129240.1	49.3467	68.9567	29.7	10
SMEL_001g129250.1	4.53667	0.426667	2.58333	1
SMEL_001g129410.1	596.427	169.237	368.013	1
SMEL_001g129420.1	1.72	0.02	0.146667	12
SMEL_001g129530.1	698.013	1426.17	1196.29	6
SMEL_001g129540.1	12.67	87.4033	18.8267	4
SMEL_001g129590.1	0.956667	4.44333	4.19667	6
SMEL_001g129650.1	15.42	10.8233	6.53333	7
SMEL_001g129710.1	37.2367	9.82333	32.36	11
SMEL_001g129750.1	3.18667	6.26	2.11333	4
SMEL_001g129770.1	13.8167	28.3933	12.0767	4
SMEL_001g130020.1	2.52333	7.2	2.29667	4
SMEL_001g130090.1	1.05	2.11667	0.943333	4
SMEL_001g130150.1	4.05	0.253333	0.593333	12
SMEL_001g130230.1	6.79	2.37667	4.99667	11
SMEL_001g130250.1	8.67667	3.42	5.68333	1
SMEL_001g130350.1	13.08	4.25	5.30667	12
SMEL_001g130360.1	1.97	0.436667	0.616667	12
SMEL_001g130370.1	0.17	0.983333	1.44667	9
SMEL_001g130440.1	0.06	0.45	0.693333	9
SMEL_001g130490.1	6.68333	2.15	3.06	12
SMEL_001g130510.1	4.33	2.17333	4.77333	8
SMEL_001g130550.1	2.02	0.236667	1.01667	1
SMEL_001g130720.1	169.923	209.857	92.6033	10
SMEL_001g130760.1	0.73	1.05333	1.39	9
SMEL_001g130790.1	11.7067	4.38333	8.68	11
SMEL_001g130910.1	3.08667	0.316667	0.23	2
SMEL_001g130920.1	6.07667	3.92	2.59333	7
SMEL_001g130990.1	37.7733	93.4733	92.8667	6
SMEL_001g131020.1	44.47	18.6267	45.1467	8
SMEL_001g131150.1	4.13	10.6233	8.28333	6
SMEL_001g131200.1	6.18667	9.65	11.5767	9
SMEL_001g131220.1	19.1567	30.0167	35.0233	9
SMEL_001g131310.1	4.57333	4.73333	1.52667	10
SMEL_001g131370.1	31.01	39.7633	58.5333	3
SMEL_001g131750.1	9.13	2.93	3.39667	12
SMEL_001g131760.1	33.5433	10.6033	10.0267	2
SMEL_001g131920.1	13.9367	1.86	4.98	12
SMEL_001g131950.1	61.5567	24.82	42.9133	1
SMEL_001g131960.1	1.32333	0.26	0.61	1
SMEL_001g132170.1	21.94	4.32667	5.78	12
SMEL_001g132230.1	7.92667	2.82	4.55	1
SMEL_001g132400.1	2.48667	6.44667	5.62	6
SMEL_001g132420.1	4.25667	0.983333	2.20667	1
SMEL_001g132430.1	2.16333	0.346667	1.04667	1
SMEL_001g132630.1	2.05333	1.74667	4.79333	3
SMEL_001g132690.1	3.31333	8.95333	6	5
SMEL_001g132720.1	4.68333	17.0533	13.5833	6
SMEL_001g132750.1	23.84	39.88	46.7433	9
SMEL_001g132780.1	3.31	1.35	2.41333	1
SMEL_001g132800.1	8.79667	5.31	3.59667	7
SMEL_001g132920.1	23.2167	0.796667	18.47	11
SMEL_001g133090.1	78.5567	143.587	164.563	9
SMEL_001g133130.1	13.1833	13.4967	25.0733	3
SMEL_001g133200.1	1.11	0.57	1.4	8
SMEL_001g133470.1	4.01333	1.29	1.71667	12
SMEL_001g133530.1	5.92333	3.31	7.66333	8
SMEL_001g133700.1	76.4233	33.11	71.8367	11
SMEL_001g133720.1	0.323333	0.0266667	0.05	12
SMEL_001g133830.1	87.0133	94.76	171.627	3
SMEL_001g133860.1	7.59	13.1333	16.78	9
SMEL_001g133870.1	89.8667	141.697	181.3	9
SMEL_001g133940.1	19.99	27.7533	6.82667	10
SMEL_001g133960.1	26.4667	11.0333	23.48	11
SMEL_001g134020.1	4.31667	2.26667	1.03333	7
SMEL_001g134030.1	1.7	0.456667	0.48	12
SMEL_001g134650.1	33	62.2667	81.8633	9
SMEL_001g134660.1	3.39333	10.3067	14.2467	9
SMEL_001g134740.1	16.4867	4.82667	13.4467	11
SMEL_001g134770.1	66.17	216.143	232.863	9
SMEL_001g134800.1	9.65	3.70667	8.34	11
SMEL_001g135050.1	8.2	50.2667	12.2467	4
SMEL_001g135070.1	5.68	2.35667	3.22667	12
SMEL_001g135160.1	3.30333	0.71	2.5	11
SMEL_001g135200.1	1.26333	1.09667	0.276667	7
SMEL_001g135240.1	97.8567	18.7367	50.3133	1
SMEL_001g135440.1	0.11	0.956667	0.32	5
SMEL_001g135570.1	37.4767	82.53	164.983	3
SMEL_001g135600.1	3.35	2.17	1.28333	7
SMEL_001g135850.1	3.82667	4.45333	2.09333	10
SMEL_001g135900.1	1.10667	0.156667	0.726667	11
SMEL_001g136030.1	0.996667	2.31667	0.45	10
SMEL_001g136090.1	6.79667	13.3033	7.72667	4
SMEL_001g136220.1	1.73	0.833333	2.53333	8
SMEL_001g136240.1	2.44333	0.983333	2.39667	8
SMEL_001g136360.1	8.85667	6.37	3.10667	7
SMEL_001g136480.1	45.0333	81.91	66.1133	6
SMEL_001g136760.1	66.17	109.14	134.093	9
SMEL_001g136860.1	2.36	8.59667	7.19	6
SMEL_001g136900.1	9.53667	5.25667	11.29	8
SMEL_001g137090.1	87.35	125.777	166.91	9
SMEL_001g137420.1	35.5367	73.3367	91.3833	9
SMEL_001g137550.1	58.07	77.05	32.6333	10
SMEL_001g137580.1	581.157	173.473	237.31	12
SMEL_001g137640.1	2.84333	6.26	9.21333	9
SMEL_001g137650.1	3.31333	3.58667	8.3	3
SMEL_001g137660.1	0.03	0.256667	0.586667	3
SMEL_001g137770.1	2.41667	6.26	3.88333	5
SMEL_001g137820.1	68.76	30.6467	57.9533	11
SMEL_001g137870.1	34.2533	74.2833	53.0867	5
SMEL_001g137880.1	267.917	96.44	131.57	12
SMEL_001g138000.1	6.19333	5.04667	2.75333	7
SMEL_001g138020.1	6.61667	2.69333	3.44667	12
SMEL_001g138120.1	14.45	4.51	7.05	12
SMEL_001g138130.1	1.39333	0.86	1.77	8
SMEL_001g138150.1	10.84	6.27	4.38333	7
SMEL_001g138160.1	15.9933	33.94	31.23	6
SMEL_001g138360.1	46.5	143.443	100.91	6
SMEL_001g138370.1	1.49	3.63333	2.7	6
SMEL_001g138850.1	1.40333	4.56333	4.81667	9
SMEL_001g139200.1	227.523	260.857	407.697	3
SMEL_001g139340.1	8.16333	3.16	7.83	8
SMEL_001g139380.1	8.77333	3.60333	6.76333	11
SMEL_001g139410.1	8.89	3.54	6.18	1
SMEL_001g139430.1	7.2	3.15	5.04333	1
SMEL_001g139740.1	63.57	137.087	81.35	5
SMEL_001g139750.1	1.23	4.44333	0.553333	4
SMEL_001g139820.1	35.0367	13.8767	22.1767	1
SMEL_001g140050.1	1.48333	0.49	1.07	11
SMEL_001g140310.1	0.863333	0.0766667	0.126667	12
SMEL_001g140340.1	2.71667	0.94	1.08333	12
SMEL_001g140580.1	203.57	217.557	521.997	3
SMEL_001g140680.1	10.6033	3.65667	3.51333	2
SMEL_001g140790.1	27.7433	48.57	51.9967	9
SMEL_001g140970.1	338.707	114.583	200.443	1
SMEL_001g141140.1	544.803	456.033	113.947	7
SMEL_001g141270.1	0.226667	4.13667	1.27	5
SMEL_001g141470.1	23.94	5.03	9.85	12
SMEL_001g141520.1	5.74333	11.5167	7.34	5
SMEL_001g141540.1	2.28	0.81	2.12333	11
SMEL_001g141890.1	118.88	238.63	242.843	9
SMEL_001g142120.1	193.197	51.5233	140.49	11
SMEL_001g142370.1	1.33667	4.38333	2.79333	5
SMEL_001g142380.1	3.11667	0.936667	1.17667	12
SMEL_001g142760.1	92.9733	25.5667	27.9	12
SMEL_001g142840.1	8.33333	4.63	9.93	8
SMEL_001g142870.1	10.76	19.8067	22.02	9
SMEL_001g142940.1	3.13	0.556667	0.98	12
SMEL_001g143490.1	50.2267	103.93	165.32	9
SMEL_001g143710.1	0.64	1.53	0.936667	5
SMEL_001g144130.1	1.25333	5.55333	2.05	5
SMEL_001g144370.1	18.0267	22.25	10.6367	10
SMEL_001g145620.1	19.0967	31.9467	46.6433	9
SMEL_001g145760.1	52.1733	21.03	33.5067	1
SMEL_001g145890.1	13.18	30.1733	17.99	5
SMEL_001g146980.1	0.0433333	0.94	0.376667	5
SMEL_001g147140.1	10.5633	7.99667	4.57333	7
SMEL_001g147350.1	32.8267	70.1167	56.9767	6
SMEL_001g147770.1	18.8967	21.3233	7.87667	10
SMEL_001g148030.1	7.05	3.06	4.77333	1
SMEL_001g148220.1	11.6	4.26333	6.54667	1
SMEL_001g148280.1	5.92	0.573333	0.91	12
SMEL_001g148520.1	6.02667	3.54667	7.59	8
SMEL_001g148690.1	1.22667	0.326667	0.463333	12
SMEL_001g148720.1	47.3767	18.88	22.68	12
SMEL_001g148880.1	0.153333	1.25333	0.566667	5
SMEL_001g148980.1	115.387	33.46	54.18	12
SMEL_001g149010.1	2.05333	0.81	1.08	12
SMEL_001g149020.1	26.0767	10.4133	17.6333	1
SMEL_001g149050.1	2.53667	1.39333	3.69	8
SMEL_001g149080.1	0.05	0.206667	0.276667	9
SMEL_001g149130.1	1.40667	6.02	2.29333	5
SMEL_001g149270.1	44.1167	81.0567	60.47	5
SMEL_001g149320.1	19.51	27.4267	42.58	3
SMEL_001g149380.1	23.7533	31.66	75.0433	3
SMEL_001g149610.1	3.15	0.583333	2.71333	11
SMEL_001g149620.1	9.74333	3.10333	9.28667	8
SMEL_001g149760.1	1.51	2.17333	3.76333	3
SMEL_001g149840.1	1.81333	0.84	1.79	8
SMEL_001g150130.1	21.3267	7.53667	10.0667	12
SMEL_001g150160.1	4.48333	0.173333	5.27667	8
SMEL_001g150220.1	52.34	91.08	128.187	9
SMEL_001g150580.1	0.573333	0.973333	1.5	3
SMEL_001g150610.1	6.94	11.6133	17.7067	3
SMEL_001g150690.1	7.41	2.56333	3.46	12
SMEL_001g150790.1	24.42	10.5667	8.67	2
SMEL_001g150860.1	31.57	3.22667	35.7167	8
SMEL_001g150880.1	9.77667	29.4	24.0567	6
SMEL_001g150900.1	22.99	9.66333	4.34333	7
SMEL_001g150960.1	0.00666667	0.226667	0.0333333	4
SMEL_001g150990.1	33.6033	14.5633	7.90667	2
SMEL_001g151050.1	36.6567	25.7633	10.3667	7
SMEL_001g151160.1	33.1567	19.0767	12.3767	7
SMEL_001g151180.1	7.88	2.38333	2.49333	12
SMEL_001g151190.1	26.7467	4.70333	11.12	1
SMEL_001g151230.1	8.73333	3.19	5.54	1
SMEL_001g151290.1	9.78	3.57667	6.13	1
SMEL_001g151380.1	99.6333	56.21	144.047	8
SMEL_001g151390.1	1.97333	1.53667	4.50667	3
SMEL_001g151660.1	5.55333	5.11333	1.52	7
SMEL_001g151700.1	160.43	64.2933	105.023	1
SMEL_001g151760.1	2.32	0.703333	1.51667	1
SMEL_001g151800.1	40.3033	24.37	15.68	7
SMEL_001g151830.1	108.527	206.357	167.313	6
SMEL_001g152300.1	2.21	1.40333	0.743333	7
SMEL_001g152320.1	13.7033	5.37667	5.12	2
SMEL_001g152360.1	3.54333	4.58667	2.21667	10
SMEL_001g152370.1	0.193333	0.0333333	0.0233333	2
SMEL_001g152420.1	328.863	713.223	549.723	6
SMEL_001g152550.1	26.1933	51.4867	26.54	4
SMEL_001g152560.1	1.03667	1.21	0.19	10
SMEL_001g152590.1	0.286667	0.816667	0.393333	5
SMEL_001g152620.1	36.7333	169.637	93.0933	5
SMEL_001g152710.1	11.38	4.21333	5.36667	12
SMEL_001g152920.1	16.5767	10.8733	7.3	7
SMEL_001g153010.1	9.69	0.363333	1.71	12
SMEL_001g153100.1	26.8133	14.0333	10.47	2
SMEL_001g153310.1	5.27333	0.706667	1.04333	12
SMEL_002g153410.1	9.8	2.58	4.91667	1
SMEL_002g153460.1	10.5433	15.05	22.8233	3
SMEL_002g153470.1	2.43333	0.8	1.36	1
SMEL_002g153720.1	1036.97	670.447	382.31	7
SMEL_002g154100.1	91.5767	126.203	173.99	3
SMEL_002g154110.1	0	3.97333	0	4
SMEL_002g155190.1	46.6333	63.9867	90.49	3
SMEL_002g155270.1	5.90333	14.9767	6.34333	4
SMEL_002g156060.1	4.8	2.66667	6.10333	8
SMEL_002g156100.1	0.403333	0.356667	1.33667	3
SMEL_002g156150.1	47.02	93.0167	121.527	9
SMEL_002g156350.1	22.6567	11.7267	27.6267	8
SMEL_002g157500.1	10.59	1.73667	3.83667	12
SMEL_002g157570.1	1.89667	0	0.746667	1
SMEL_002g157990.1	8.6	37.8867	6.18333	4
SMEL_002g158430.1	8.18	2.02667	1.21667	2
SMEL_002g158590.1	2.83333	0.613333	1.65667	1
SMEL_002g158770.1	15.0633	6.85	17.1767	8
SMEL_002g158850.1	2.67	30.56	2.24333	4
SMEL_002g158930.1	9.91667	1.96667	3.09333	12
SMEL_002g159000.1	23.2433	172.047	24.1967	4
SMEL_002g159140.1	2.32667	2.34333	0.703333	10
SMEL_002g159370.1	0.643333	0.126667	0.296667	1
SMEL_002g159490.1	4.38	2.77	1.73	7
SMEL_002g159530.1	10.28	1.66667	2.87667	12
SMEL_002g159680.1	5.5	2.72333	6.05	8
SMEL_002g159750.1	36.1467	9.59	20	1
SMEL_002g159840.1	0.416667	1.20333	0.88	6
SMEL_002g159870.1	4.4	44.6933	34.79	6
SMEL_002g159950.1	17.3533	33.4733	29.7067	6
SMEL_002g160020.1	4.43667	1.8	2.15	12
SMEL_002g160060.1	124.087	231.413	160.897	5
SMEL_002g160140.1	9.54667	6.2	2.03	7
SMEL_002g160170.1	82.1767	33.1367	40.8567	12
SMEL_002g160180.1	12.1667	5.79	3.88333	2
SMEL_002g160980.1	1.91	3.96	4.42667	9
SMEL_002g161190.1	6.52	1.19	1.13	2
SMEL_002g161450.1	6.78	1.64333	5.26333	11
SMEL_002g161510.1	4.13667	0.49	1.56	1
SMEL_002g161630.1	11.53	29.83	38.05	9
SMEL_002g161680.1	1.47333	0.613333	0.773333	12
SMEL_002g161790.1	0.41	1.69333	0.76	5
SMEL_002g161940.1	0	0.736667	0.11	4
SMEL_002g162080.1	43.2133	59.2733	92.7233	3
SMEL_002g162090.1	23.4033	31.7867	50.5033	3
SMEL_002g162400.1	5.27667	1.62	2.47667	12
SMEL_002g162480.1	23.25	8.73	11.2367	12
SMEL_002g162510.1	3.6	1.04333	3.96333	8
SMEL_002g162530.1	1.37	8.7	2.87	5
SMEL_002g162550.1	257.283	97.12	87.8767	2
SMEL_002g162720.1	52.2233	6.27	31.4533	1
SMEL_002g162740.1	1.09	0.35	0.96	11
SMEL_002g162840.1	30.2567	72.8067	27.3167	4
SMEL_002g163210.1	0.73	2.32	0.98	4
SMEL_002g163250.1	10.31	5.7	1.58	7
SMEL_002g163420.1	8.42333	12.1833	19.7567	3
SMEL_002g163490.1	1.12667	7.35	17.1567	3
SMEL_002g163520.1	2.41	1.11667	3.47667	8
SMEL_002g163600.1	2.62667	5.28333	5.75667	9
SMEL_002g163650.1	0.123333	0.273333	0.9	3
SMEL_002g163690.1	6.07667	63.45	15.2167	4
SMEL_002g163950.1	1.19333	0.52	0.143333	7
SMEL_002g163970.1	9.27	14.4167	21.71	3
SMEL_002g164020.1	5.97667	5.94667	11.2233	3
SMEL_002g164140.1	21.3233	9.20667	14.86	1
SMEL_002g164180.1	1.21333	0.41	0.7	1
SMEL_002g164340.1	24.7367	10.2667	4.02333	7
SMEL_002g164400.1	90.4333	121.763	54.9	10
SMEL_002g164580.1	0.07	0.393333	0.293333	6
SMEL_002g164630.1	27.0367	39.0067	52.1467	9
SMEL_002g164760.1	34.9133	78.6033	126.773	9
SMEL_002g165010.1	630.5	401.507	204.56	7
SMEL_002g165070.1	38.55	42.19	16.3733	10
SMEL_002g165210.1	3.71	5.22333	6.95	9
SMEL_002g165260.1	69.6433	129.473	109.457	6
SMEL_002g165310.1	34.6733	9.86	6.58333	2
SMEL_002g165370.1	4.8	11.33	6.78333	5
SMEL_002g165450.1	66.1667	156.907	162.933	9
SMEL_002g165500.1	1.13	0.446667	3.51333	3
SMEL_002g165510.1	304.357	553.603	635.37	9
SMEL_002g165560.1	13.91	25.23	23.2633	6
SMEL_002g165630.1	10.94	2.90333	12.5067	8
SMEL_002g165700.1	23.8467	41.4867	69.16	3
SMEL_002g165810.1	1.7	0.543333	0.683333	12
SMEL_002g165880.1	2.72667	3.70667	1.70333	10
SMEL_002g165910.1	8.70333	53.5967	8.93667	4
SMEL_002g165950.1	29.7467	80.6633	53.0533	5
SMEL_002g166060.1	10.5733	1.33667	6.51333	11
SMEL_002g166180.1	5.74333	5.42667	2.62333	7
SMEL_002g166330.1	120.703	204.027	253.313	9
SMEL_002g166340.1	12.89	6.87333	13.5367	8
SMEL_002g166360.1	66.07	115.727	139.473	9
SMEL_002g166370.1	13.91	17.7467	26.54	3
SMEL_002g166490.1	0.796667	1.53667	2.27	9
SMEL_002g166690.1	11.6833	19.4467	28.87	3
SMEL_002g166700.1	2.43	3.08	15.1667	3
SMEL_002g166770.1	18.3433	52.2367	18.2267	4
SMEL_002g166830.1	11.0167	4.18	7.14333	1
SMEL_002g166890.1	87.2333	144.513	211.607	3
SMEL_002g166930.1	6.54	8.76667	15.17	3
SMEL_002g166970.1	3.04	1.90333	4.14	8
SMEL_002g166990.1	26.38	35.9767	15.6067	10
SMEL_002g167010.1	24.61	50.8733	51.88	9
SMEL_002g167040.1	1.74	0.396667	1.37667	11
SMEL_002g167090.1	1.65	0.0766667	0.623333	1
SMEL_002g167230.1	10.46	10.5433	20.99	3
SMEL_002g167390.1	15.7467	5.63667	8.54	1
SMEL_002g167440.1	43.1067	13.8167	37.7867	11
SMEL_002g167450.1	2.16333	12.44	0.566667	4
SMEL_002g167470.1	13.1367	5.41333	9.05667	1
SMEL_002g167660.1	14.0333	5.77667	9.73667	1
SMEL_002g167730.1	58.9067	134.433	57.8333	4
SMEL_002g167840.1	10.5367	4.61333	6.50667	1
SMEL_002g167950.1	148.613	196.807	270.67	3
SMEL_002g167980.1	17.7333	41.14	36.42	6
SMEL_002g168020.1	8.54	22.17	77.8033	3
SMEL_002g168070.1	8.27333	26.4967	16.5933	5
SMEL_002g168100.1	11.1867	19.63	22.9833	9
SMEL_002g168140.1	1.42333	4.97	2.41667	5
SMEL_002g168180.1	2.06333	1.14333	2.52667	8
SMEL_002g168190.1	3.13667	3.11333	6.17	3
SMEL_002g168250.1	35.22	27.16	54.0933	3
SMEL_002g168260.1	30.35	49.99	54.68	9
SMEL_002g168410.1	19.6033	13.2467	6.51	7
SMEL_002g168440.1	24.38	9.57667	15.28	1
SMEL_002g168450.1	4.72333	1.14667	0.87	2
SMEL_002g168860.1	30.24	25.65	10.58	7
SMEL_003g169130.1	25.3467	85.6867	59.7933	6
SMEL_003g169190.1	28.5233	8.97333	17.5667	1
SMEL_003g169320.1	1.95333	4.25333	0.86	10
SMEL_003g169410.1	242.04	90.38	144.893	1
SMEL_003g169510.1	14.36	31.5167	10.8967	4
SMEL_003g169530.1	35.8933	125.557	36.02	4
SMEL_003g169560.1	26.5833	11.88	17.3	1
SMEL_003g169650.1	7.47667	16.6333	6.07667	4
SMEL_003g169660.1	11.0467	6.84333	2.09333	7
SMEL_003g169700.1	1.27	0.316667	1.09333	11
SMEL_003g169820.1	35.31	26.71	13.52	7
SMEL_003g169910.1	0.723333	0.0266667	0.136667	12
SMEL_003g170020.1	6.88333	5.51	2.32667	7
SMEL_003g170220.1	153.107	20.69	12.74	2
SMEL_003g170270.1	7.61667	3.27	4.87667	1
SMEL_003g170280.1	1.13667	0.0766667	0.0633333	2
SMEL_003g170400.1	3.89333	2.13667	1.63333	2
SMEL_003g170620.1	11.21	28.1833	32.05	9
SMEL_003g170700.1	6.70333	20.5167	24.5	9
SMEL_003g170780.1	2.17333	3.38667	0.996667	10
SMEL_003g170820.1	4.80667	8.5	2.89333	10
SMEL_003g170860.1	1.83	2.31	0.846667	10
SMEL_003g170990.1	0.943333	1.74	3.29333	3
SMEL_003g171060.1	2.2	4.91333	3.21667	5
SMEL_003g171210.1	6.45	2.85333	1.70333	2
SMEL_003g171220.1	43.84	18.5433	21.0367	12
SMEL_003g171270.1	10.2567	9.60667	2.72	7
SMEL_003g171290.1	19.91	14.6667	8.66667	7
SMEL_003g171350.1	232.21	149.53	91.8333	7
SMEL_003g171370.1	2.47667	1.98	0.953333	7
SMEL_003g171410.1	2.71	0.586667	2.04333	11
SMEL_003g171420.1	1.79667	0.636667	0.853333	12
SMEL_003g171720.1	1.48333	0.473333	0.176667	2
SMEL_003g171730.1	1.12333	0	0.18	12
SMEL_003g171750.1	0.713333	0.143333	1.44333	8
SMEL_003g171770.1	44.75	19.8167	28.2033	1
SMEL_003g171800.1	4.10333	2.64333	1.48	7
SMEL_003g171810.1	4.53333	1.56667	3.9	11
SMEL_003g171930.1	10.1933	2.20667	1.18667	2
SMEL_003g171970.1	28.9533	20.1033	40.4333	8
SMEL_003g172050.1	2.74333	0.9	0.84	2
SMEL_003g172280.1	37.8867	39.4133	17.2767	10
SMEL_003g172410.1	4.18	3.73667	1.76333	7
SMEL_003g172470.1	68.5667	15.1433	46.5733	11
SMEL_003g172580.1	21.7767	7.36	10.18	12
SMEL_003g172610.1	414.757	149.577	180.367	12
SMEL_003g172890.1	8.99333	1.65667	7.52667	11
SMEL_003g173040.1	0.85	0.54	0.233333	7
SMEL_003g173060.1	58.86	30.7133	10.39	7
SMEL_003g173190.1	1.06333	0.0866667	0.67	11
SMEL_003g173270.1	0.12	1.15	0.606667	5
SMEL_003g173670.1	0.346667	2.39	0.156667	4
SMEL_003g173700.1	23.27	25.2833	11.48	10
SMEL_003g173840.1	5.96667	5.15667	0.943333	7
SMEL_003g174060.1	48.4567	13.96	26.7333	1
SMEL_003g174070.1	5.11	0.79	2.57667	1
SMEL_003g174590.1	37.49	92.72	61.8467	5
SMEL_003g175150.1	36.8133	3.00667	17.65	1
SMEL_003g175470.1	7.92667	3.43667	10.98	8
SMEL_003g175550.1	14.6533	5.92667	5.92667	2
SMEL_003g175610.1	41.96	18.11	17.0333	2
SMEL_003g175630.1	1.97667	2.88667	5.60333	3
SMEL_003g175640.1	88.6133	163.96	261.767	3
SMEL_003g175790.1	3.48333	1.61	3.73	8
SMEL_003g175920.1	4.04333	1.53	3.45	11
SMEL_003g176200.1	3.5	39	6.46667	4
SMEL_003g176250.1	6.42	2.83667	7.03	8
SMEL_003g176460.1	2.96667	5.46667	2.34333	4
SMEL_003g176470.1	6.40333	10.5067	3.40333	10
SMEL_003g176490.1	10.83	28.9033	30.4467	9
SMEL_003g176760.1	3.88	1.42667	2.66667	1
SMEL_003g177050.1	3.27667	2.34333	0.973333	7
SMEL_003g177080.1	4.48	3.59	7.29333	3
SMEL_003g178110.1	51.6267	110.87	143.587	9
SMEL_003g178320.1	1.01667	0.03	0.286667	12
SMEL_003g178450.1	4.92333	9.03	11.1833	9
SMEL_003g178540.1	21.8233	9.85333	7.42333	2
SMEL_003g178710.1	2.72667	11.91	12.1467	9
SMEL_003g178820.1	6.5	2.28667	1.59	2
SMEL_003g178950.1	0.146667	3.76667	1.73333	5
SMEL_003g179000.1	11.32	6.32333	4.6	2
SMEL_003g179240.1	3.26667	1.15	1.4	12
SMEL_003g179660.1	3.02333	1.15	4.94667	8
SMEL_003g179670.1	33.6433	82.0333	54.3167	5
SMEL_003g179870.1	440.36	292.45	109.01	7
SMEL_003g179990.1	11.3	59.88	34.6067	5
SMEL_003g180350.1	1.32	0.06	0.18	12
SMEL_003g180380.1	44.1367	69.2933	87.7167	9
SMEL_003g180460.1	45.8333	119.577	120.217	6
SMEL_003g180470.1	37.0233	60.0367	28.6033	4
SMEL_003g180590.1	3.65	14.7633	10.8667	6
SMEL_003g180610.1	10.08	17.3433	21.81	9
SMEL_003g180660.1	1029.75	2014.66	1516.07	5
SMEL_003g180820.1	2.40333	0.623333	0.803333	12
SMEL_003g180840.1	49.9133	66.2333	95.09	3
SMEL_003g180850.1	35.85	21.3933	44.22	8
SMEL_003g180870.1	0.946667	0.196667	0.366667	12
SMEL_003g180890.1	8.66667	2.08667	2.55333	12
SMEL_003g180920.1	1.7	1.23	0.343333	7
SMEL_003g180970.1	1.85	0.783333	1.49	11
SMEL_003g181020.1	39.8433	83.33	98.1533	9
SMEL_003g181030.1	1.81667	3.83	4.24333	9
SMEL_003g181210.1	3.49667	1.15333	3.8	8
SMEL_003g181380.1	2.56333	1.04	2.21	11
SMEL_003g181450.1	1.20667	0.5	1.06667	11
SMEL_003g181460.1	5.37333	11.3967	36.87	3
SMEL_003g181610.1	3.79	1.58	4.32	8
SMEL_003g181740.1	0.336667	1.68667	2.51	9
SMEL_003g181850.1	52.5533	71.72	94.2867	3
SMEL_003g181920.1	2.48333	0.716667	2.49667	8
SMEL_003g181940.1	5.97	38.4767	15.3	5
SMEL_003g182490.1	27.85	171.677	173.753	6
SMEL_003g182730.1	6.11667	2.99	2.28667	2
SMEL_003g182750.1	27.6667	16.2933	44.1467	8
SMEL_003g182800.1	14.0933	5.58	13.0767	11
SMEL_003g182900.1	4.43	8.49667	5.89667	5
SMEL_003g183020.1	4.49	1.88667	5.74667	8
SMEL_003g183040.1	5.29333	4.74667	2.13667	7
SMEL_003g183060.1	3.65	6.23667	2.72667	4
SMEL_003g183140.1	9.97	13.4533	4.59333	10
SMEL_003g183190.1	99.0733	42.3733	72.0133	1
SMEL_003g183230.1	21.7	8.05	7.47667	2
SMEL_003g183360.1	5.98667	2.19	5.44333	11
SMEL_003g183480.1	1.26333	1.72667	0.723333	10
SMEL_003g183550.1	0.436667	3.02333	0.603333	4
SMEL_003g183630.1	8.93333	3.97	6.89667	11
SMEL_003g183700.1	24.65	49.63	96.1533	3
SMEL_003g183750.1	3.01667	4.95667	2.29667	4
SMEL_003g183800.1	21.7133	4.77	7.61333	12
SMEL_003g183930.1	39.6933	97.89	47.26	4
SMEL_003g184030.1	45.7167	19.1333	20.2167	12
SMEL_003g184110.1	4.48333	1.25667	2.00667	12
SMEL_003g184130.1	35.77	11.7367	15.45	12
SMEL_003g184550.1	1.37333	0.753333	1.57	8
SMEL_003g184660.1	9.63333	30.0467	22.4733	6
SMEL_003g184780.1	17.5667	29.77	37.04	9
SMEL_003g185080.1	18.1067	46.0367	36.76	6
SMEL_003g185340.1	26.9433	8.56	8.54	2
SMEL_003g185360.1	5.23667	1.56333	1.37667	2
SMEL_003g185430.1	3.40333	1.50667	2.78667	11
SMEL_003g185490.1	3.78	11.0133	3.20667	4
SMEL_003g185510.1	18.9967	59.17	86.48	9
SMEL_003g185530.1	3.34333	5.78	2.77	4
SMEL_003g185560.1	126.48	252.473	218.817	6
SMEL_003g185630.1	50.36	319.393	198.863	6
SMEL_003g185680.1	8.60333	4.84333	3.67333	2
SMEL_003g185810.1	116.92	6.36	74.3167	11
SMEL_003g185850.1	4.32	4.70667	8.83	3
SMEL_003g185880.1	34.0233	68.95	75.4867	9
SMEL_003g185920.1	62.9733	25.33	14.2033	2
SMEL_003g186020.1	10.7067	24.4767	10.05	4
SMEL_003g186100.1	1.49	1.89	0.873333	10
SMEL_003g186160.1	4.07667	6.45667	2.98333	10
SMEL_003g186230.1	14.4333	28.2967	2.98333	10
SMEL_003g186240.1	91.3333	45.3733	35.1067	2
SMEL_003g186310.1	37.6267	143.483	106.793	6
SMEL_003g186320.1	13.8833	25.3133	28.1333	9
SMEL_003g186330.1	2.73	5.93667	4.06333	5
SMEL_003g186370.1	5.78667	1.25667	3.12333	1
SMEL_003g186380.1	8.89667	4.08333	12.1667	8
SMEL_003g186410.1	38.4433	55.2467	85.32	3
SMEL_003g186430.1	6.85667	2.70333	4.83	1
SMEL_003g186570.1	23.5467	8.95333	15.59	1
SMEL_003g186770.1	2.63	2.67667	0.956667	10
SMEL_003g186840.1	14.4667	4.11	4.94667	12
SMEL_003g186880.1	1.00667	0.0566667	0.19	12
SMEL_003g186890.1	0.28	0.153333	0.65	3
SMEL_003g186930.1	35.0933	57.35	81.6733	9
SMEL_003g187280.1	4.22667	2.55	1.04	7
SMEL_003g187430.1	9.22	16.94	16.33	6
SMEL_003g187710.1	8.74333	44.3267	26.2833	5
SMEL_003g187810.1	93.7767	38.2733	78.02	11
SMEL_003g187890.1	2.89667	0.51	1.33667	1
SMEL_003g187970.1	6.16	0.676667	3.67333	1
SMEL_003g188140.1	1.30667	0.19	0.113333	2
SMEL_003g188220.1	91.3667	157.8	181.967	9
SMEL_003g188230.1	50.4367	108.7	30.0333	4
SMEL_003g188400.1	3.82	54.2467	42.1067	6
SMEL_003g188410.1	47.9767	253.493	287.083	9
SMEL_003g188480.1	0.06	0.383333	0.306667	6
SMEL_003g188870.1	39.8733	29.61	14.0767	7
SMEL_003g188900.1	63.73	42.4833	85.6933	8
SMEL_003g188980.1	17.5467	14.48	7.68	7
SMEL_003g189040.1	18.4033	7.25667	10.83	1
SMEL_003g189210.1	6.32667	10.3033	11.3167	9
SMEL_003g189260.1	0.4	1.10667	0.946667	6
SMEL_003g189310.1	5.56667	7.12333	10.86	3
SMEL_003g189330.1	7.72333	7.89333	18.4067	3
SMEL_003g189470.1	36.57	13.0933	26.87	11
SMEL_003g189560.1	0.756667	3.64667	2.63667	6
SMEL_003g189870.1	2.18667	1.69	0.633333	7
SMEL_003g189940.1	3.26	1.40333	1.17667	2
SMEL_003g189980.1	7.44333	16.3667	8.29667	4
SMEL_003g190050.1	75.4367	101.807	49.1333	10
SMEL_003g190150.1	11.9667	4.14333	5.49333	12
SMEL_003g190260.1	4.90667	1.48	1.33667	2
SMEL_003g190320.1	16.5133	28.7233	34.42	9
SMEL_003g190470.1	33.1567	101.023	100.973	6
SMEL_003g190490.1	2.59667	1.36333	3.12333	8
SMEL_003g190500.1	28.37	79.2167	83.8167	9
SMEL_003g190510.1	7.82	3.63333	8.04667	8
SMEL_003g190540.1	2.67	11.4867	27.25	3
SMEL_003g190630.1	17.0433	8.32	6.98333	2
SMEL_003g190650.1	3.47667	0.99	1.36667	12
SMEL_003g190670.1	84.8067	53.53	27.34	7
SMEL_003g190680.1	6.46667	2.51333	4.85667	11
SMEL_003g190750.1	17.8667	57.2	63.4133	9
SMEL_003g190760.1	35.9767	93.7833	81.4033	6
SMEL_003g190790.1	82.1733	135.967	151.687	9
SMEL_003g190850.1	13.6833	6.70333	6.04667	2
SMEL_003g191100.1	1.36	3.8	1.11667	4
SMEL_003g191130.1	32.1133	13.1833	11.8733	2
SMEL_003g191170.1	1.57667	0.58	1.25667	11
SMEL_003g191230.1	5.29667	2.25667	4.3	11
SMEL_003g191300.1	7.65667	3.09667	8.70333	8
SMEL_003g191310.1	3.70667	7.31	4.71667	5
SMEL_003g191330.1	8.19	1.67667	2.68	12
SMEL_003g191360.1	15.7867	28.3567	37.8667	9
SMEL_003g191470.1	41.61	62.6567	94.4733	3
SMEL_003g191510.1	82.6667	176.113	48.0533	4
SMEL_003g191530.1	8.30333	5.13333	10.1367	8
SMEL_003g191640.1	4.56	2.53	5.20333	8
SMEL_003g191690.1	73.9633	147.27	307.723	3
SMEL_003g191760.1	11.0867	4.12333	4.64	12
SMEL_003g191770.1	0.99	0.32	0.873333	11
SMEL_003g191930.1	6.50667	19.18	10.9433	5
SMEL_003g192030.1	13.5	29.2767	19.97	5
SMEL_003g192130.1	3.26333	2.84	6.24	3
SMEL_003g192330.1	1.03667	5.77	5.56333	6
SMEL_003g192350.1	0.35	1.26333	1.47333	9
SMEL_003g192470.1	57.9533	9.26667	38.81	11
SMEL_003g192560.1	191.973	410.03	396.693	6
SMEL_003g192590.1	23.4033	41.2733	45.0267	9
SMEL_003g192610.1	4.34667	2.92333	1.8	7
SMEL_003g192780.1	0.58	0.0533333	0.0133333	2
SMEL_003g192800.1	57.8767	14.2733	29.0667	1
SMEL_003g192870.1	0.25	0.653333	0.596667	6
SMEL_003g192930.1	19.9133	39.4067	23.2033	5
SMEL_003g193010.1	8.18333	32.8467	28.6833	6
SMEL_003g193040.1	17.2533	43.61	34.8267	6
SMEL_003g193070.1	3.16333	7.52333	8.00667	9
SMEL_003g193200.1	51.5467	21.1333	62.7267	8
SMEL_003g193340.1	2.44667	1.71	0.67	7
SMEL_003g193410.1	0.47	1.91333	0.786667	5
SMEL_003g193490.1	75.0733	352.257	268.123	6
SMEL_003g193500.1	3.02667	14.29	8.34667	5
SMEL_003g193570.1	76.8433	151.51	124.63	6
SMEL_003g193580.1	1.96667	0.593333	0.946667	12
SMEL_003g193600.1	4.09667	6.03667	2.27333	10
SMEL_003g193640.1	59.5533	24.9533	26.9767	12
SMEL_003g193650.1	73.7867	92.58	32.3833	10
SMEL_003g193700.1	1.51667	3.16333	4.1	9
SMEL_003g193770.1	10.8067	16.4333	25.7933	3
SMEL_003g193850.1	5.61667	2.37	4.09333	1
SMEL_003g193960.1	0.446667	0.0833333	0.07	2
SMEL_003g193970.1	2.16667	10.84	10.78	6
SMEL_003g194000.1	2.75	5.53333	6.63333	9
SMEL_003g194220.1	20.7367	6.71333	12.1033	1
SMEL_003g194310.1	6.26333	22.6967	16.6367	6
SMEL_003g194320.1	151.57	307.463	196.193	5
SMEL_003g194330.1	2.43667	5.88	6.20333	9
SMEL_003g194340.1	34.4467	69.87	65.53	6
SMEL_003g194370.1	79.0167	31.8667	54.23	1
SMEL_003g194460.1	1.93	3.21667	1.15333	10
SMEL_003g194470.1	8	3.12333	4.15667	12
SMEL_003g194540.1	172.81	31.26	157.71	11
SMEL_003g194550.1	4.52333	1.74667	3.39667	11
SMEL_003g194590.1	2.31	0.833333	2.11	11
SMEL_003g194650.1	5.55333	4.00333	2.4	7
SMEL_003g194730.1	4.60667	0.43	0.75	12
SMEL_003g194740.1	0.86	0.0333333	0.106667	12
SMEL_003g194750.1	1.24	0.0366667	0.0366667	2
SMEL_003g194870.1	20.5367	28.0033	37.57	3
SMEL_003g194880.1	69.27	131.407	184.2	9
SMEL_003g194890.1	12.7167	39.9267	41.76	9
SMEL_003g194900.1	30.66	42.84	77.5133	3
SMEL_003g194930.1	5.39	10.8767	23.7267	3
SMEL_003g194960.1	42.9933	12.0667	18.0367	12
SMEL_003g194990.1	5.32	4.63	9.76667	3
SMEL_003g195100.1	34.4367	58.4867	83.21	9
SMEL_003g195260.1	10.69	39.35	31.5267	6
SMEL_003g195280.1	0.153333	0.783333	0.416667	5
SMEL_003g195460.1	366.397	430.307	849.89	3
SMEL_003g195480.1	2.83	4.32667	6.45	3
SMEL_003g195770.1	46.0267	81.1533	34.2467	4
SMEL_003g195780.1	15.19	36.5267	54.46	9
SMEL_003g195790.1	22.7233	46.0633	68.04	9
SMEL_003g195800.1	4.12	1.43	4.65	8
SMEL_003g195870.1	1.74667	2.5	0.95	10
SMEL_003g195930.1	5.20333	0.243333	0.66	12
SMEL_003g195940.1	30.8067	12.49	15.3833	12
SMEL_003g195950.1	1.77	4.13333	6.78667	9
SMEL_003g195990.1	123.65	55.37	85.0133	1
SMEL_003g196050.1	22.6067	15.4567	34.6067	8
SMEL_003g196120.1	0.71	0.503333	1.57667	3
SMEL_003g196220.1	30.3167	12.9833	31.0633	8
SMEL_003g196240.1	7.85	1.90333	2.47667	12
SMEL_003g196280.1	46.2567	18.8433	30.3433	1
SMEL_003g196440.1	109.83	247.153	281.877	9
SMEL_003g196460.1	6.00333	2.87667	6.07	8
SMEL_003g196860.1	0.956667	0.633333	1.27667	8
SMEL_003g196970.1	6.15333	15.1633	5.65667	4
SMEL_003g196980.1	42.6567	74.4533	77.2133	9
SMEL_003g197020.1	3.96	0.93	1.59333	12
SMEL_003g197040.1	17.5633	8.74333	7.83333	2
SMEL_003g197100.1	30.8267	40.2833	65.7167	3
SMEL_003g197110.1	3.60333	4.31667	7.25	3
SMEL_003g197130.1	38.6033	11.5733	19.71	1
SMEL_003g197160.1	27.5167	11.2767	7.99333	2
SMEL_003g197170.1	48.2633	7.34	18.93	1
SMEL_003g197200.1	1.3	18.6233	6.87333	5
SMEL_003g197270.1	10.6167	22.1333	33.98	9
SMEL_003g197290.1	0.306667	0.613333	0.876667	9
SMEL_003g197320.1	20.6367	7.22	8.18333	12
SMEL_003g197390.1	14.9667	5.05	6.17	12
SMEL_003g197510.1	173.41	282.36	419.27	3
SMEL_003g197590.1	0.813333	0.24	0.2	2
SMEL_003g197770.1	6.37	13.0167	6.02	4
SMEL_003g197840.1	0.0766667	0.373333	0.106667	4
SMEL_003g197950.1	14.34	8.32667	25.7033	8
SMEL_003g198100.1	3.34333	0.976667	1.92	1
SMEL_003g198250.1	12.7533	3.82333	7.06333	1
SMEL_003g198270.1	7.55333	11.74	16.4267	9
SMEL_003g198320.1	20.7633	8.53667	14.6267	1
SMEL_003g198400.1	35.4133	49.3533	67.5733	3
SMEL_003g198530.1	24.2933	10.2733	19.4967	11
SMEL_003g198550.1	5.05667	1.78333	4.78	11
SMEL_003g198640.1	16.9967	23.22	35.97	3
SMEL_003g198650.1	43.6033	114.1	91.9467	6
SMEL_003g198680.1	5.03333	1.48	5.54	8
SMEL_003g198810.1	23.0567	16.1067	5.27333	7
SMEL_003g198890.1	10.3033	24.8533	30.55	9
SMEL_003g198980.1	8.01667	1.56	3.05667	12
SMEL_003g199140.1	90.45	30.96	56.76	1
SMEL_003g199260.1	7.40333	1.69667	1.14667	2
SMEL_003g199300.1	3.54333	0.37	1	12
SMEL_003g199340.1	33.0033	29.34	78.68	3
SMEL_003g199430.1	33.5767	46.7233	19.5967	10
SMEL_003g199440.1	15.5933	22.1333	9.92	10
SMEL_003g199630.1	2.20667	0.573333	2.30667	8
SMEL_003g199670.1	5.72333	4.07667	2.18333	7
SMEL_003g199760.1	1.13667	0.0866667	0	2
SMEL_003g199840.1	2.65333	1.03	1.33	12
SMEL_003g199930.1	70.2433	88.2	31.9233	10
SMEL_004g200010.1	842.543	1267.96	1529.34	9
SMEL_004g200060.1	123.487	64.4133	131.98	8
SMEL_004g200070.1	31.4167	15.65	38.2933	8
SMEL_004g200250.1	0.78	1.10667	0.466667	10
SMEL_004g200400.1	8.96333	7.34	3.81	7
SMEL_004g200440.1	12.5567	4.7	5.13333	12
SMEL_004g200500.1	21.17	8.67667	15.8167	11
SMEL_004g200590.1	3.98667	0.486667	1.16667	12
SMEL_004g200600.1	20.76	38.1433	56.7033	9
SMEL_004g200620.1	16.23	32.4333	15.48	4
SMEL_004g200680.1	10.4933	6.24	4.3	7
SMEL_004g200720.1	2.39	9.64333	6.15333	6
SMEL_004g200730.1	2.99333	1.15	3.11	8
SMEL_004g200740.1	7.19	2.46667	5.42	11
SMEL_004g200770.1	22.2267	32.1567	46.0233	3
SMEL_004g200920.1	2.17333	2.98333	1.11667	10
SMEL_004g201750.1	0.846667	0.233333	0.0566667	2
SMEL_004g201770.1	2.60667	1.28	2.77333	8
SMEL_004g201870.1	43.6767	53.85	86.7567	3
SMEL_004g201950.1	9.67333	11.96	5.65333	10
SMEL_004g202000.1	758.363	511.747	286.89	7
SMEL_004g202360.1	36.4467	22.15	10.4367	7
SMEL_004g202710.1	5	1.27667	3.92	11
SMEL_004g202760.1	0.893333	0.14	0.146667	2
SMEL_004g202810.1	3.75333	0.2	0.0633333	2
SMEL_004g203250.1	9.29	17.0167	18.0033	9
SMEL_004g203540.1	135.097	37.36	60.96	12
SMEL_004g203770.1	28.23	80.31	70.4767	6
SMEL_004g203780.1	96.5333	220.903	194.173	6
SMEL_004g203840.1	0.46	0.0533333	0.44	8
SMEL_004g203860.1	25.65	8.84	26.6433	8
SMEL_004g204400.1	6.75	4.83	2.02	7
SMEL_004g204420.1	10.6633	4.13667	10.2733	8
SMEL_004g204490.1	1.50667	1.99	0.753333	10
SMEL_004g204610.1	0.763333	2.25333	0.773333	4
SMEL_004g204650.1	9.86	16.4533	3.73333	10
SMEL_004g204770.1	640.967	288.22	467.183	1
SMEL_004g204910.1	0.136667	0.466667	0.0333333	4
SMEL_004g205110.1	75.4833	2.34333	33.7	1
SMEL_004g205120.1	109.097	8.35333	51.89	1
SMEL_004g205160.1	508.953	164.687	328.91	1
SMEL_004g205550.1	19.9967	13.4267	8.85333	7
SMEL_004g205580.1	17.5833	4.70667	6.04667	12
SMEL_004g205760.1	58.8033	103.647	114.917	9
SMEL_004g206000.1	20.1433	59.7	31.6933	5
SMEL_004g206050.1	1.97	0.473333	0.316667	2
SMEL_004g206100.1	659.267	218.967	333.007	12
SMEL_004g206760.1	18.2333	3.40667	4.05667	12
SMEL_004g206880.1	54.5067	21.7367	25.6067	12
SMEL_004g207040.1	12.6767	29.5133	14.0033	4
SMEL_004g207160.1	33.5567	14.27	29.8667	11
SMEL_004g207480.1	7.14333	8.39	12.8833	3
SMEL_004g207730.1	28.86	44.2333	68.3967	3
SMEL_004g208360.1	2.95667	6.73	4.87667	5
SMEL_004g208790.1	80.78	167.527	199.183	9
SMEL_004g209020.1	2.89	5.53	1.96667	4
SMEL_004g209040.1	27.3767	36.3133	76.43	3
SMEL_004g209140.1	3.25333	1.49333	3.75667	8
SMEL_004g209690.1	4.64	11.5867	9.22	6
SMEL_004g210000.1	208.62	242.067	388.33	3
SMEL_004g210130.1	21.4133	9.65	13.5833	1
SMEL_004g210310.1	1.52333	0.476667	1.46667	8
SMEL_004g210580.1	4.29667	4.37333	1.48	10
SMEL_004g210710.1	16.34	27.52	13.27	4
SMEL_004g210750.1	1.42333	0.776667	0.316667	7
SMEL_004g210840.1	4.90333	2.64333	1.56	7
SMEL_004g210870.1	10.44	6.30333	3.70667	7
SMEL_004g211010.1	6.59	16.4567	6.88667	4
SMEL_004g211230.1	3.92	7.34333	4.24667	4
SMEL_004g211350.1	9.69667	16.48	17.7433	9
SMEL_004g211600.1	22.3867	8.92333	14.9967	1
SMEL_004g211650.1	5.80667	4.67333	2.46667	7
SMEL_004g211720.1	43.9433	16.9967	20.7133	12
SMEL_004g211770.1	0.583333	0.203333	0.88	8
SMEL_004g211890.1	1.68333	0.21	0.733333	1
SMEL_004g211900.1	2.69667	5.72333	3.31	5
SMEL_004g211910.1	73.28	169.643	92.3567	5
SMEL_004g211920.1	36.7033	85.1133	48.1833	5
SMEL_004g212040.1	0.986667	0.276667	1.19	8
SMEL_004g212400.1	69.6067	19.7033	31.15	12
SMEL_004g212530.1	89.77	134.703	221.697	3
SMEL_004g212720.1	27.6267	10.01	5.09	2
SMEL_004g212800.1	0.366667	0.0866667	0.363333	8
SMEL_004g213050.1	6.34333	0.73	0.53	2
SMEL_004g213080.1	3.22333	0.576667	1.01667	12
SMEL_004g213160.1	0.276667	1.28	0.523333	5
SMEL_004g213850.1	29.5467	282.653	49.76	4
SMEL_004g214020.1	6.53333	53.7033	17.1133	5
SMEL_004g214050.1	8.20333	2.88	6.48333	11
SMEL_004g214140.1	45.1333	92.11	97.1033	9
SMEL_004g214160.1	3.71667	0.8	0.776667	2
SMEL_004g214410.1	1.81667	0.773333	1.41333	11
SMEL_004g214430.1	16.2067	5.25	5.39667	2
SMEL_004g214460.1	0.59	1.09667	1.43333	9
SMEL_004g214590.1	2.37333	10.5967	7.53667	6
SMEL_004g214750.1	2.97667	1.47333	5.41667	8
SMEL_004g214780.1	5.07667	1.88333	8.98	8
SMEL_004g214790.1	8.06333	3.28667	2.92333	2
SMEL_004g214820.1	4.6	2.24667	1.72	2
SMEL_004g214940.1	2.29667	1.22667	2.67	8
SMEL_004g214960.1	91.79	329.697	216.223	6
SMEL_004g215020.1	2.77667	4.85667	5.92667	9
SMEL_004g215090.1	4.94333	1.44	3.8	11
SMEL_004g215230.1	39.04	21.5967	15.8733	2
SMEL_004g215270.1	0.403333	6.20667	3.22667	5
SMEL_004g215500.1	15.5367	86.41	4.53	4
SMEL_004g215590.1	118.94	32.45	39.5633	12
SMEL_004g215600.1	3.41667	0.87	2.92667	11
SMEL_004g215720.1	28.0867	51.9967	11.3867	10
SMEL_004g215760.1	41.5267	66.5333	105.46	3
SMEL_004g215850.1	1.03667	2.02667	0.91	4
SMEL_004g215920.1	0.39	1.34333	0.283333	4
SMEL_004g215970.1	0.0733333	1.35667	0.383333	5
SMEL_004g215980.1	0.47	1.21	0.243333	4
SMEL_004g215990.1	0.313333	1.85333	0.833333	5
SMEL_004g216150.1	2.62	5.18333	1.16667	10
SMEL_004g216240.1	2.48	2.89	6.47	3
SMEL_004g216260.1	5.92333	1.42667	1.91333	12
SMEL_004g216400.1	327.393	673.283	556.45	6
SMEL_004g216410.1	36.4533	96.37	116.15	9
SMEL_004g216470.1	7.32	2.38	4.38333	1
SMEL_004g216550.1	57.4633	101.003	49.3633	4
SMEL_004g216570.1	13.0233	23.6433	25.5533	9
SMEL_004g216630.1	26.85	72.9733	48.1767	5
SMEL_004g216640.1	7.06	12.54	15.7	9
SMEL_004g216790.1	83.1067	141.28	162.19	9
SMEL_004g217020.1	6.12	16.2667	26.64	9
SMEL_004g217130.1	3.90333	1.82333	4.27667	8
SMEL_004g217170.1	0.623333	0.69	1.31	3
SMEL_004g217650.1	192.657	108.957	55.5533	7
SMEL_004g217680.1	6.74333	9.46667	18.96	3
SMEL_004g217740.1	12.7433	17.93	24.4567	3
SMEL_004g217780.1	7.63	17.3967	26.7633	9
SMEL_004g217810.1	24.8367	13.1867	9.00667	2
SMEL_004g217930.1	8.22	14.2567	19.36	9
SMEL_004g218000.1	11.7433	4.18667	11.0633	11
SMEL_004g218060.1	4.30333	20.5	9.72667	5
SMEL_004g218070.1	1.57333	3.81667	2.22667	5
SMEL_004g218080.1	13.2	4.39333	4.49	2
SMEL_004g218090.1	17.23	5.94	16.8333	8
SMEL_004g218170.1	0.706667	0.353333	1.13	8
SMEL_004g218180.1	12.7867	4.57	11.2967	11
SMEL_004g218270.1	63.28	94.0033	177.37	3
SMEL_004g218320.1	3.58	4.31	6.52	3
SMEL_004g218440.1	37.8767	15.23	13.6967	2
SMEL_004g218450.1	78.64	54.6733	141.393	3
SMEL_004g218500.1	2.12	5.15333	2.33667	4
SMEL_004g218530.1	1.19	0.21	0.116667	2
SMEL_004g218630.1	11.5633	6.85667	5.08333	2
SMEL_004g218680.1	48.5433	86.7533	106.143	9
SMEL_004g218770.1	0.286667	0.28	0.823333	3
SMEL_004g218820.1	7.51333	1.35	1.91667	12
SMEL_004g218880.1	3.85	2.01667	1.21	7
SMEL_004g219020.1	0.97	3.34333	3.54333	9
SMEL_004g219030.1	0.46	1.30667	1.75333	9
SMEL_004g219080.1	28.5733	107.143	42.0567	5
SMEL_004g219120.1	21.8833	9.65	11.0733	12
SMEL_004g219210.1	2.41	3.71667	0.93	10
SMEL_004g219250.1	4.51	9.99	14.2367	9
SMEL_004g219260.1	143.6	199.473	296.047	3
SMEL_004g219270.1	73.8167	206.49	134.217	5
SMEL_004g219290.1	423.45	950.187	992.653	9
SMEL_004g219300.1	1.65	0.656667	0.933333	12
SMEL_004g219340.1	13.1967	36.4567	20.4367	5
SMEL_004g219370.1	0.84	1.11333	1.81	3
SMEL_004g219420.1	5.45333	2.22	1.40333	2
SMEL_004g219430.1	1.36	2.72667	1.47667	4
SMEL_004g219440.1	52.4733	108.983	147.237	9
SMEL_004g219480.1	5.02333	0.936667	2.16333	1
SMEL_004g219490.1	17.2667	39.13	35.9	6
SMEL_004g219530.1	27.98	55.9367	20.5433	4
SMEL_004g219560.1	35.5467	45.34	65.5233	3
SMEL_004g219590.1	0.386667	1.24333	0.456667	4
SMEL_004g219780.1	6.89667	1.78333	3.31667	1
SMEL_004g219850.1	34.3067	77.2933	104.647	9
SMEL_004g219860.1	10.3667	9.2	4.04	7
SMEL_004g219900.1	2.92	5.46	1.82667	10
SMEL_004g219940.1	21.3133	40.16	32.05	6
SMEL_004g219960.1	32.7733	33.1533	64.8	3
SMEL_004g220010.1	24.8567	34.2133	50.93	3
SMEL_004g220030.1	2.84	0.153333	0.313333	12
SMEL_004g220130.1	2.03667	1.63667	3.21667	3
SMEL_004g220200.1	12.4567	1.08	3.01	12
SMEL_004g220220.1	1.39333	0.316667	0.803333	1
SMEL_004g220270.1	33.27	9.06333	24.1167	11
SMEL_004g220310.1	3.82333	1.06667	1.19667	12
SMEL_004g220350.1	1.11	3.24333	2.67667	6
SMEL_004g220440.1	2.56	3.84667	4.66667	9
SMEL_004g220480.1	1.46667	6.75333	1.65333	4
SMEL_004g220520.1	26.7267	52.4267	62.1933	9
SMEL_004g220670.1	3.27	1.37	3.39	8
SMEL_004g220700.1	1.67667	0.7	0.823333	12
SMEL_004g220880.1	80.3733	156.383	123.967	6
SMEL_004g221120.1	1.33	0.113333	0.216667	12
SMEL_004g221280.1	2.16333	3.65	1.42667	10
SMEL_004g221430.1	62.3133	36.73	26.4967	7
SMEL_004g221450.1	5.63333	3.25	1.66667	7
SMEL_004g221470.1	142.85	116.983	61.4733	7
SMEL_004g221550.1	2.75333	7.47667	3.89333	5
SMEL_004g221560.1	1.12667	0.726667	0.43	7
SMEL_004g221570.1	2.15333	0.536667	1.64333	11
SMEL_004g221580.1	41.5633	144.517	66.8933	5
SMEL_004g221750.1	42.24	182.367	164.917	6
SMEL_004g221960.1	1.91333	2.62333	4.50333	3
SMEL_004g222040.1	2.01667	1.21	2.58	8
SMEL_004g222220.1	63.0767	127.677	146.493	9
SMEL_004g222240.1	3.44333	23.99	5.32667	4
SMEL_004g222310.1	4.93333	19.0533	15.44	6
SMEL_004g222330.1	10.79	24.8167	28.1367	9
SMEL_004g222370.1	2.45333	6.68	1.87333	4
SMEL_004g222430.1	107.103	61.68	44.7167	2
SMEL_004g222530.1	19.71	46.7	58.9167	9
SMEL_004g222640.1	33.99	54.5233	80.6967	3
SMEL_004g222700.1	35.8567	28.4367	14.0667	7
SMEL_004g222710.1	10.6167	9.21	3.88333	7
SMEL_004g222750.1	28.14	24.84	10.7133	7
SMEL_004g222770.1	52.8567	94.6767	149.49	3
SMEL_004g222800.1	8.1	3.34333	3.21667	2
SMEL_004g222810.1	1830.39	3929.6	2430.77	5
SMEL_004g222830.1	0.716667	0.916667	1.69333	3
SMEL_004g222990.1	0.89	0.0833333	0.116667	12
SMEL_004g223030.1	133.087	39.6333	102.6	11
SMEL_004g223050.1	4.63667	1.47667	4.72667	8
SMEL_004g223450.1	46.6867	84.8633	88.35	9
SMEL_004g223500.1	8.34333	3.07667	7.03667	11
SMEL_004g223550.1	6.67333	2.06333	6.89333	8
SMEL_004g223560.1	33.05	13.5367	13.26	2
SMEL_004g223590.1	1.45	0.63	0.976667	1
SMEL_004g223620.1	29.7	17.3133	34.6333	8
SMEL_005g223800.1	33.2867	27.39	10.7067	7
SMEL_005g223940.1	3.85667	1.63333	3.47	11
SMEL_005g223990.1	32.8667	62.8933	82.6867	9
SMEL_005g224000.1	5.5	4.19667	1.79333	7
SMEL_005g224010.1	113.117	55.9933	158.457	8
SMEL_005g224120.1	2.45667	1.21667	2.40333	8
SMEL_005g224280.1	3.86333	0.903333	1.85667	1
SMEL_005g224410.1	6.95	0.613333	0.506667	2
SMEL_005g224510.1	11.6533	21.72	10.6067	4
SMEL_005g224560.1	3.28	0.74	2.20667	11
SMEL_005g224640.1	1.04667	4.63333	9.65667	3
SMEL_005g224690.1	24.98	8.12333	15.6133	1
SMEL_005g224720.1	33.1667	13.2	15.57	12
SMEL_005g224740.1	64.9733	143.51	156.54	9
SMEL_005g224800.1	3.04	2.1	0.84	7
SMEL_005g224820.1	0.7	0.26	0.903333	8
SMEL_005g224840.1	79.44	32.2233	57.77	1
SMEL_005g224850.1	6.11333	2.20333	5.24667	11
SMEL_005g225020.1	16.6567	3.67	3.36	2
SMEL_005g225510.1	21.0333	15.4233	8.05667	7
SMEL_005g225570.1	1.66333	0.566667	0.17	2
SMEL_005g225660.1	4.64667	22.2	13.2067	5
SMEL_005g225680.1	1.62	12.9267	4.81	5
SMEL_005g225790.1	1.88	1.86667	0.526667	10
SMEL_005g225890.1	2.66333	1.44667	1.17	2
SMEL_005g225900.1	6.62	2.8	2.6	2
SMEL_005g225970.1	6.70333	1.07667	0.56	2
SMEL_005g225990.1	5.09	0.61	1.21	12
SMEL_005g226040.1	67.4667	10.74	11.8667	12
SMEL_005g226060.1	14.3067	19.9967	26.86	3
SMEL_005g226120.1	28.52	12.0267	7.45	2
SMEL_005g226310.1	551.373	299.467	163.717	7
SMEL_005g226390.1	2.74667	5.72	1.98	4
SMEL_005g226580.1	13.71	5.02667	9.06	1
SMEL_005g226690.1	11.0567	25.8	10.16	4
SMEL_005g226710.1	258.817	240.993	116.233	7
SMEL_005g226720.1	11.5067	6.37333	17.4633	8
SMEL_005g226960.1	16.7667	4.87333	4.08667	2
SMEL_005g226990.1	3.67	2.15333	1.13	7
SMEL_005g227030.1	0.563333	3.8	1.51	5
SMEL_005g227050.1	2.52667	15.5833	3.37333	4
SMEL_005g227200.1	22.21	24.88	12.2433	10
SMEL_005g227250.1	4.95333	8.95667	4.17667	4
SMEL_005g227320.1	21.22	7.82667	12.8367	1
SMEL_005g227370.1	289.57	371.97	177.183	10
SMEL_005g227440.1	143.147	165.473	286.65	3
SMEL_005g227520.1	16.8933	7.03	11.95	1
SMEL_005g227530.1	0.513333	0.89	1.68667	3
SMEL_005g227710.1	10.1667	51.45	37.2933	6
SMEL_005g227740.1	274.683	166.983	107.12	7
SMEL_005g227760.1	16.9	12.5267	4.25	7
SMEL_005g227910.1	6.75667	4.74333	2.81333	7
SMEL_005g227950.1	4.54667	1.75	3.68333	11
SMEL_005g228040.1	419.02	756.457	895.553	9
SMEL_005g228110.1	13.7633	4.67333	16.9667	8
SMEL_005g228120.1	31.92	57.7467	157.877	3
SMEL_005g228240.1	73.03	23.12	15.04	2
SMEL_005g228360.1	4.61667	9.51	53.6767	3
SMEL_005g228400.1	0.753333	0.2	0.646667	11
SMEL_005g228500.1	5.17333	11.2067	7.28333	5
SMEL_005g228670.1	74.4933	116.85	164.133	9
SMEL_005g228930.1	12.61	22.19	6.28333	10
SMEL_005g229000.1	14.1	13.4167	6.41667	7
SMEL_005g229050.1	20.0967	11.3967	7.64667	7
SMEL_005g229070.1	4.86	1.59333	5.85333	8
SMEL_005g229130.1	9.34667	3.36333	3.49	12
SMEL_005g229200.1	64.04	27.9267	59.19	11
SMEL_005g229210.1	28.5	10.1033	23.7367	11
SMEL_005g229220.1	56.5633	22.59	19.1233	2
SMEL_005g229300.1	4.53333	3.21	6.47	8
SMEL_005g229420.1	28.8867	64.01	72.6067	9
SMEL_005g229510.1	26.0433	60.85	23.91	4
SMEL_005g229620.1	17.0967	6.07667	10.8433	1
SMEL_005g229630.1	10.1433	4.17	4.63667	12
SMEL_005g229650.1	2.57333	8.54333	5.03333	5
SMEL_005g229810.1	1.20333	0.103333	0.313333	12
SMEL_005g229890.1	2.41667	0.476667	0.55	12
SMEL_005g229920.1	53.76	43.2967	22.97	7
SMEL_005g229960.1	11.9933	2.16333	5.39	1
SMEL_005g230080.1	11.5033	6.24333	4.45	2
SMEL_005g230210.1	0.9	0.0433333	0.116667	12
SMEL_005g230310.1	0.753333	1.70333	2.32	9
SMEL_005g230370.1	56.2967	106.85	66.9	5
SMEL_005g230420.1	23.34	8.85667	11.3767	12
SMEL_005g230550.1	3.59667	0.873333	0.96	12
SMEL_005g231020.1	0.833333	0.483333	3.59	3
SMEL_005g231080.1	1.53333	0.883333	0.426667	7
SMEL_005g231090.1	0.99	1.11667	0.146667	10
SMEL_005g231120.1	1.04	0.34	0.253333	2
SMEL_005g231220.1	44.5567	17.1167	36.4933	11
SMEL_005g231340.1	100.353	45.21	75.1	1
SMEL_005g231450.1	17.9467	4.41	14.4367	11
SMEL_005g231670.1	1.96333	0.126667	0.98	1
SMEL_005g231740.1	20.4933	18.5467	8.32667	7
SMEL_005g231920.1	22.97	40.0567	70.1867	3
SMEL_005g232380.1	7.63667	2.12	5.56333	11
SMEL_005g232600.1	9.24667	6.21667	3.73	7
SMEL_005g232620.1	413.5	768.03	779.817	9
SMEL_005g232780.1	3.12333	1.00667	3.72	8
SMEL_005g232810.1	5.13	6.18	2.82667	10
SMEL_005g232970.1	3.27	9.5	3.50667	4
SMEL_005g233110.1	6.45667	5.36333	2.89	7
SMEL_005g233370.1	0.176667	0.43	0.0733333	10
SMEL_005g233530.1	1.52333	1.95667	0.83	10
SMEL_005g233540.1	11.44	12.7867	5.55	10
SMEL_005g233550.1	13.9333	15.2233	4.79333	10
SMEL_005g233760.1	1.32667	0.8	1.98333	8
SMEL_005g233790.1	10.7933	20.5667	13.5267	5
SMEL_005g233950.1	0.54	0.0633333	0.0766667	12
SMEL_005g233990.1	4.63333	2.52	1.40667	7
SMEL_005g234420.1	2.42	0.183333	0.573333	12
SMEL_005g234430.1	23.3533	12.98	9.95667	2
SMEL_005g234510.1	9.25667	20.8067	16.0767	6
SMEL_005g234590.1	60.4433	100.687	117.773	9
SMEL_005g234650.1	0.79	1.24333	0.566667	10
SMEL_005g234720.1	56.6733	23.78	48.6867	11
SMEL_005g234760.1	31.0133	11.5067	7.07333	2
SMEL_005g234830.1	4.64667	8.93667	4.62	4
SMEL_005g235020.1	27.4733	10.7567	10.3833	2
SMEL_005g235060.1	22.49	4.48	6.45333	12
SMEL_005g235330.1	1.83667	0.376667	0.736667	12
SMEL_005g235360.1	59.55	139.72	54.6833	4
SMEL_005g235530.1	6.71667	2.61	5.83	11
SMEL_005g235560.1	25	52.6267	34	5
SMEL_005g235570.1	2.48	4.24	1.64333	10
SMEL_005g235630.1	1.81667	0.57	1.37333	11
SMEL_005g235660.1	0.693333	0.05	0.166667	12
SMEL_005g235670.1	129.533	409.123	248.963	5
SMEL_005g235680.1	3.80333	28.24	16.17	5
SMEL_005g235700.1	8.50667	7.18	1.80333	7
SMEL_005g235780.1	644.613	1220.43	1482.07	9
SMEL_005g235880.1	4.55	0.923333	0.543333	2
SMEL_005g235890.1	1.47333	0.453333	0.29	2
SMEL_005g235900.1	14.78	84.2267	70.17	6
SMEL_005g235910.1	48.4333	68.8133	108.51	3
SMEL_005g235920.1	14.77	4.83667	6.81667	12
SMEL_005g235930.1	1475.78	264.217	690.887	1
SMEL_005g235960.1	0.0266667	0.236667	0.0933333	5
SMEL_005g235980.1	40.8567	16.03	31.97	11
SMEL_005g236220.1	31.98	14.8267	13.42	2
SMEL_005g236260.1	8.42333	26.04	8.00333	4
SMEL_005g236300.1	342.47	146.12	262.203	11
SMEL_005g236310.1	8.74	32.1167	10.3733	4
SMEL_005g236490.1	22.3267	4.72	8.76333	12
SMEL_005g236500.1	87.78	14.33	29.1467	12
SMEL_005g236570.1	5.09667	5.88667	1.9	10
SMEL_005g236640.1	2.66	1.31	2.71333	8
SMEL_005g236700.1	474.033	277.46	185.233	7
SMEL_005g236730.1	4.16667	0.263333	0.246667	2
SMEL_005g237010.1	103.113	152.707	207.373	9
SMEL_005g237040.1	1.32333	0.0866667	1.11667	11
SMEL_005g237070.1	1.42333	6.50333	4.67333	6
SMEL_005g237080.1	1.83667	5.49667	3.39667	5
SMEL_005g237480.1	4.42	5.82	18.5067	3
SMEL_005g237490.1	11.47	1.33	8.1	11
SMEL_005g237540.1	1.34	0.0766667	0.326667	12
SMEL_005g237590.1	11.76	3.15	9.14667	11
SMEL_005g237630.1	0	0.69	0.476667	6
SMEL_005g237690.1	18.54	34.4267	36.3767	9
SMEL_005g237790.1	3.13333	5.74333	2.63667	4
SMEL_005g237810.1	7.78667	46.6367	35.2967	6
SMEL_005g237830.1	1.28333	0.363333	1.50333	8
SMEL_005g237850.1	12.8133	0.543333	2.56333	12
SMEL_005g237870.1	10.0967	9.65333	1.25333	7
SMEL_005g237920.1	145.823	39.64	65.34	12
SMEL_005g237990.1	41.0167	18.55	33.7367	11
SMEL_005g238000.1	30.8567	15.2233	30.72	8
SMEL_005g238010.1	20.1133	11.1367	6.91	7
SMEL_005g238060.1	12.6967	3.95	11.5733	11
SMEL_005g238110.1	43.7533	67.5167	97.6733	3
SMEL_005g238120.1	167.983	302.39	350.613	9
SMEL_005g238180.1	2.07	0.72	2.44	8
SMEL_005g238210.1	1.55333	0.386667	1.18333	11
SMEL_005g238230.1	1845.14	694.367	1558.38	11
SMEL_005g238510.1	7.00667	2.54	3.36	12
SMEL_005g238580.1	2.03667	1.04333	2.29	8
SMEL_005g238770.1	32.88	52.6767	59.4433	9
SMEL_005g238790.1	4.30333	12.39	13.3033	9
SMEL_005g238950.1	1.34333	0.543333	0.776667	1
SMEL_005g239010.1	152.807	76.71	41.0533	7
SMEL_005g239080.1	0.656667	2.45667	0.566667	4
SMEL_005g239140.1	0.526667	2.17	1.08333	5
SMEL_005g239460.1	1272.76	343.827	349.933	2
SMEL_005g239630.1	14.8067	3.56667	3.38333	2
SMEL_005g239650.1	5.02	5.33	2.2	10
SMEL_005g239730.1	0.0766667	0.34	0.506667	9
SMEL_005g239750.1	0.963333	0.1	0.11	2
SMEL_005g239960.1	36.38	78.6233	65.1233	6
SMEL_005g239970.1	4.63333	0.993333	1.7	12
SMEL_005g240000.1	13.0667	23.6433	12.26	4
SMEL_005g240110.1	4.70333	1.85667	2.41667	12
SMEL_005g240130.1	7.25	13.43	15.4733	9
SMEL_005g240240.1	1.41667	1.03333	2.63333	3
SMEL_005g240370.1	3.27333	21.21	7.46	5
SMEL_005g240400.1	6.21333	13.04	10.54	6
SMEL_005g240420.1	0.643333	2.11667	1.78667	6
SMEL_005g240440.1	3.78	1.30333	4.56333	8
SMEL_005g240520.1	0.03	0.61	0.0833333	4
SMEL_005g240580.1	1.82	0.563333	1.84	8
SMEL_005g240620.1	7.98333	4.38333	10.6367	8
SMEL_005g240730.1	1.45	0.413333	1.00667	11
SMEL_005g240770.1	28.8667	11.0933	28.54	8
SMEL_005g240840.1	0.683333	0.196667	0.406667	1
SMEL_005g240930.1	4.79	1.29667	2.41667	1
SMEL_005g240950.1	8.45667	3.36333	1.97333	2
SMEL_005g240960.1	2451.93	1073.51	1570.18	1
SMEL_005g240970.1	7.78333	2.62333	5.91	11
SMEL_005g241220.1	9.21667	5	3.28667	7
SMEL_005g241230.1	135.95	23.87	30.84	12
SMEL_005g241320.1	0.153333	0.586667	0.263333	5
SMEL_005g241350.1	10.4967	3.02	3.95667	12
SMEL_005g241450.1	9.52333	2.29	2.78667	12
SMEL_005g241500.1	27.1	23.9733	9.18667	7
SMEL_005g241570.1	20.01	6.37667	14.17	11
SMEL_005g241810.1	47.58	93.5267	61.5367	5
SMEL_005g241890.1	9.98333	3.78667	1.59	2
SMEL_005g242030.1	3.04	7.96	6.63	6
SMEL_005g242080.1	1.85	1.69	3.41333	3
SMEL_006g242350.1	4.20333	5.19	10.9433	3
SMEL_006g242410.1	48.7067	32.61	14.8133	7
SMEL_006g242430.1	3.80333	2.27667	1.64333	7
SMEL_006g242460.1	1.57	2.17	0.396667	10
SMEL_006g242530.1	4.12333	1.39333	4.61	8
SMEL_006g242550.1	10.8333	7.55667	3.74667	7
SMEL_006g242560.1	8.6	7.43	2.94	7
SMEL_006g242700.1	13.3433	5.47667	15.17	8
SMEL_006g242800.1	4.48	9.02333	5.91333	5
SMEL_006g242810.1	0	0.6	0.06	4
SMEL_006g243050.1	15.2867	27.3233	38.8533	9
SMEL_006g243230.1	5.38333	22.64	27.3167	9
SMEL_006g243270.1	46.9633	109.49	116.03	9
SMEL_006g243340.1	4.8	4.70667	2.04	10
SMEL_006g243600.1	48.8067	7.63	25.24	1
SMEL_006g243710.1	1.30667	2.72	0.746667	10
SMEL_006g244080.1	0.196667	0.7	0.413333	5
SMEL_006g244560.1	38.65	24.0267	16.74	7
SMEL_006g244640.1	3.51	4.41333	1.9	10
SMEL_006g245070.1	25.8567	8.80333	9.61333	12
SMEL_006g245100.1	844.873	596.993	335.61	7
SMEL_006g245180.1	1.11667	3.67	0.696667	4
SMEL_006g245220.1	59.01	151.02	239.137	9
SMEL_006g245230.1	86.1933	193.133	300.173	9
SMEL_006g245480.1	138.8	51.5333	95.02	1
SMEL_006g245490.1	23.5	37.84	64.62	3
SMEL_006g245660.1	7.08667	8.01667	13.01	3
SMEL_006g245690.1	21.0733	27.5567	50.05	3
SMEL_006g245880.1	256.44	983.087	1007.63	9
SMEL_006g246540.1	5.26667	2.21667	5.43	8
SMEL_006g246710.1	8.20333	18.6033	15.2167	6
SMEL_006g246850.1	1.24333	0.656667	1.58333	8
SMEL_006g247110.1	4.42667	1.43333	0.6	2
SMEL_006g247130.1	11.1067	43.6733	10.58	4
SMEL_006g247270.1	0.546667	1.10333	0.27	10
SMEL_006g247290.1	14.5067	5.50333	5	2
SMEL_006g247430.1	0.67	0	0.0333333	12
SMEL_006g247500.1	80.7867	34.9533	80.6433	8
SMEL_006g247600.1	6.09	10.9667	5.33	4
SMEL_006g247770.1	26.01	9.22	16.9533	1
SMEL_006g247900.1	103.653	34.6433	92.1067	11
SMEL_006g247940.1	81.22	19.25	16.2633	2
SMEL_006g247990.1	469.643	234.007	203.333	2
SMEL_006g248140.1	8.25	4.14667	1.90333	7
SMEL_006g248390.1	13.0333	4.88667	2.3	2
SMEL_006g248460.1	3.83333	6.79	8.17	9
SMEL_006g248510.1	10.58	3.12	3.39333	12
SMEL_006g248640.1	6.43667	2.21	3.03	12
SMEL_006g249160.1	32.8067	29.22	118.193	3
SMEL_006g249190.1	4.77667	6.79333	2.86667	10
SMEL_006g249200.1	5.60333	80.61	27.4133	5
SMEL_006g249240.1	5.02667	14.6933	8.86	5
SMEL_006g249310.1	7.64667	16.7533	9.84667	5
SMEL_006g249380.1	1.70667	0.446667	1.05	1
SMEL_006g249410.1	12.3467	29.8133	13.5133	4
SMEL_006g249420.1	14.07	27.51	10.5467	4
SMEL_006g249460.1	88.6	74.8133	175.91	3
SMEL_006g249550.1	4.12667	1.85	3.98	8
SMEL_006g249570.1	2.86667	2.17333	5.32667	3
SMEL_006g249600.1	56.6533	77.6233	106.177	3
SMEL_006g249680.1	1.50667	0.293333	0.373333	12
SMEL_006g249730.1	0.993333	2.08667	0.726667	4
SMEL_006g249760.1	49.0133	122.417	101.3	6
SMEL_006g249840.1	8.33	28.4533	7.82667	4
SMEL_006g249850.1	5.36667	18.5867	6.29667	4
SMEL_006g250060.1	351.933	660.32	699	9
SMEL_006g250500.1	1.38667	4.43333	2.64333	5
SMEL_006g250520.1	0.526667	1.27667	0.35	4
SMEL_006g251010.1	21.74	36.3533	50.48	9
SMEL_006g251020.1	24.2833	44.32	46.4367	9
SMEL_006g251030.1	4.47	10.96	5.35667	4
SMEL_006g251090.1	2.72333	0.736667	0.156667	2
SMEL_006g251100.1	3.72	0.826667	0.143333	2
SMEL_006g251190.1	21.5467	56.9367	74.76	9
SMEL_006g251200.1	0.423333	1.03667	0.616667	5
SMEL_006g251240.1	2.75667	7.66	2.20333	4
SMEL_006g251320.1	12.1	23.1333	32.79	9
SMEL_006g251330.1	14.3867	5.63	7.75	12
SMEL_006g251380.1	52.9567	15.0533	22.55	12
SMEL_006g251390.1	16.4833	49.6933	26.07	5
SMEL_006g251410.1	35.2133	3.27	17.4433	1
SMEL_006g251480.1	2.98	1.02667	2.72333	11
SMEL_006g251500.1	0.41	1.03	0.683333	5
SMEL_006g251760.1	3.51333	1.16667	3.08667	11
SMEL_006g251780.1	15.9567	6.37	14.9	11
SMEL_006g251810.1	2.94667	5.15333	1.41333	10
SMEL_006g251820.1	1.02333	2.19333	3.38	9
SMEL_006g251960.1	0.406667	1.10667	0.746667	5
SMEL_006g251970.1	32.0333	110.89	121.513	9
SMEL_006g252150.1	67.86	311.097	240.62	6
SMEL_006g252280.1	7.78333	13.5033	14.72	9
SMEL_006g252720.1	7.83333	1.87333	2.99	12
SMEL_006g252960.1	15.52	26.8333	29.8033	9
SMEL_006g253010.1	94.58	169.797	217.25	9
SMEL_006g253100.1	4.28333	1.01333	6.61667	8
SMEL_006g253110.1	3.30667	1.84333	0.716667	7
SMEL_006g253270.1	3.74	1.66	1.95333	12
SMEL_006g253470.1	0.623333	1.53	0.546667	4
SMEL_006g253640.1	0.873333	2.37667	1.16667	5
SMEL_006g253760.1	13.3267	4.56667	6.22	12
SMEL_006g253810.1	2.74667	6.59333	10.7433	9
SMEL_006g253910.1	23.3167	70.8667	71.69	6
SMEL_006g254170.1	3.28	14.0533	10.9267	6
SMEL_006g254240.1	8.85	19.0833	5.02667	4
SMEL_006g254390.1	26.3267	48.67	24.7767	4
SMEL_006g254400.1	18.6933	49.1867	49.0833	6
SMEL_006g254650.1	9.77333	2.09333	7.76667	11
SMEL_006g254710.1	28.86	13.1233	18.8	1
SMEL_006g255040.1	18.41	29.7533	34.08	9
SMEL_006g255060.1	9.06	10.8567	4.69667	10
SMEL_006g255230.1	49.1967	123.67	364.867	3
SMEL_006g255250.1	5.27	10.9667	52.46	3
SMEL_006g255450.1	2.32333	0.536667	1.11667	1
SMEL_006g255460.1	31.0133	12.1133	22.1267	1
SMEL_006g255470.1	55.8833	27.62	18.8867	2
SMEL_006g255480.1	13.6267	4.79333	6.99	12
SMEL_006g255500.1	2.91333	0.63	2.44333	11
SMEL_006g255630.1	1.82	1.37667	5.19	3
SMEL_006g255810.1	1.67333	0.386667	0.423333	12
SMEL_006g255830.1	15.04	4.99	6.15	12
SMEL_006g255860.1	8.31667	3.77	5.22	1
SMEL_006g255900.1	1.25333	13.5667	3.54	5
SMEL_006g255940.1	28.8233	53.2567	62.0133	9
SMEL_006g256070.1	13.4533	5.20333	10.0633	11
SMEL_006g256080.1	16.4067	6.28333	8.94	12
SMEL_006g256110.1	71.9333	147.14	128.37	6
SMEL_006g256170.1	13.1667	5.68333	7.76	12
SMEL_006g256220.1	1.93333	0.84	1.52333	11
SMEL_006g256450.1	5.63	2.36	1.43667	2
SMEL_006g256500.1	7.27333	9.02333	2.22667	10
SMEL_006g256530.1	0.146667	1.10667	0.536667	5
SMEL_006g256540.1	6.71667	1.82333	4.10333	1
SMEL_006g256650.1	131.58	163.803	268.567	3
SMEL_006g256680.1	3.62667	6.68	9.92333	9
SMEL_006g256830.1	9.36333	17.5367	9.18667	4
SMEL_006g256920.1	4.82333	2.84	2.11	2
SMEL_006g257020.1	5.01667	13.1633	43.1467	3
SMEL_006g257030.1	51.4067	59.0367	95.8067	3
SMEL_006g257060.1	16.0367	2.66333	6.54333	1
SMEL_006g257150.1	2.88	10.3233	7.65333	6
SMEL_006g257170.1	0.163333	2.41667	0.263333	4
SMEL_006g257250.1	106.77	26.48	49.3433	1
SMEL_006g257270.1	82.1633	14.83	61.69	11
SMEL_006g257280.1	8.77667	2.93	5.33333	1
SMEL_006g257300.1	611.767	153.913	290.39	1
SMEL_006g257380.1	187.05	143.697	69.2933	7
SMEL_006g257400.1	1.62333	3.21333	0.856667	10
SMEL_006g257500.1	6.59333	22.5433	15.7667	6
SMEL_006g257530.1	23.6167	39.8	53.64	9
SMEL_006g257610.1	2.32	0.763333	2.06333	11
SMEL_006g257650.1	80.8667	266.29	352.26	9
SMEL_006g257930.1	3.39667	1.75667	3.88333	8
SMEL_006g257940.1	8.34667	4.97	14.64	8
SMEL_006g257980.1	6.83667	11.18	14.0433	9
SMEL_006g257990.1	1.84667	4.45667	1.75667	4
SMEL_006g258340.1	1.04667	0.416667	0.926667	11
SMEL_006g258480.1	2.27	0.9	1.61333	1
SMEL_006g258550.1	2.62333	1.05	1.43333	12
SMEL_006g258620.1	4.74333	11.39	6.97	5
SMEL_006g258730.1	1.88667	4.49667	1.55333	4
SMEL_006g258840.1	4.74667	0.76	0.5	2
SMEL_006g258920.1	6.08	3.90667	7.83	8
SMEL_006g259030.1	0.34	0.0333333	0.0866667	12
SMEL_006g259060.1	0.696667	0.08	0.48	11
SMEL_006g259130.1	10.1833	3.34333	4.21	12
SMEL_006g259370.1	16.47	20.1533	7.86667	10
SMEL_006g259830.1	52.4767	159.563	85.88	5
SMEL_006g259870.1	0.93	0.643333	2.24	3
SMEL_006g259900.1	11.7533	3.48	6.22333	1
SMEL_006g259990.1	1.83667	3.97333	5.81	9
SMEL_006g260160.1	12.8733	9.72333	5.57	7
SMEL_006g260600.1	10.0333	2.79333	4.5	12
SMEL_006g260770.1	3.11667	1.06667	1.91	1
SMEL_006g260790.1	34.8833	84.0033	336.853	3
SMEL_006g260890.1	75.4833	115.34	249.077	3
SMEL_006g260910.1	1.84	0.64	0.19	2
SMEL_006g260920.1	3.39333	2.55	0.23	7
SMEL_006g260930.1	508.083	139.637	268.987	1
SMEL_006g260940.1	1.64	0.116667	1.58667	8
SMEL_006g260950.1	417.297	73.6333	232.463	1
SMEL_006g260960.1	102.313	28.3833	24.06	2
SMEL_006g261000.1	5.73667	2.42333	6.20667	8
SMEL_006g261070.1	18.6967	42.73	17.8433	4
SMEL_006g261140.1	147.057	290.59	287.25	6
SMEL_006g261150.1	71.65	163.093	221.97	9
SMEL_006g261180.1	76.81	45.46	31.82	7
SMEL_006g261340.1	8.21667	18.2233	17.1667	6
SMEL_006g261350.1	10.8633	7.06667	4.68	7
SMEL_006g261370.1	9.41333	27.2467	19.2167	6
SMEL_006g261510.1	2.55	6.76333	3.95	5
SMEL_006g261560.1	1.31	2.69333	1.11	4
SMEL_006g261820.1	2.15333	0.816667	0.553333	2
SMEL_006g261940.1	4.86333	0.74	1.07667	12
SMEL_006g261950.1	13.64	3.60667	11.5667	11
SMEL_006g261960.1	11.81	4.89333	7.12667	1
SMEL_006g262000.1	4.83	1.36	2.70333	1
SMEL_006g262050.1	50.6033	199.133	48.6967	4
SMEL_006g262090.1	2.36667	6.91667	1.94	4
SMEL_006g262110.1	129.977	71.9533	54.9433	2
SMEL_006g262120.1	0.426667	0.993333	1.14333	9
SMEL_006g262140.1	3.18333	0.616667	1.68667	1
SMEL_006g262280.1	2.27667	1.10667	0.646667	7
SMEL_006g262410.1	16.0767	6.66333	10.0267	1
SMEL_006g262430.1	12.94	4.11667	4.68	12
SMEL_006g262590.1	2.81	0.293333	0.183333	2
SMEL_006g262690.1	6.15	0.726667	0.97	12
SMEL_006g262780.1	3.07667	10.3933	5.65	5
SMEL_006g262960.1	0.3	0.196667	1.01667	3
SMEL_006g262980.1	0.593333	0.2	0.256667	12
SMEL_006g263250.1	3.3	4.18667	1.2	10
SMEL_006g263340.1	6.57	3.20333	7.32667	8
SMEL_006g263380.1	20.89	8.11667	4.73667	2
SMEL_006g263480.1	40.42	141.877	113.473	6
SMEL_006g263600.1	1.87333	1.61667	3.56667	3
SMEL_006g263670.1	17.2333	7.67	10.0333	12
SMEL_006g263770.1	35.01	11.83	31.36	11
SMEL_006g264110.1	17.7833	38.48	44.8233	9
SMEL_006g264240.1	0.29	0.786667	2.41	3
SMEL_006g264250.1	0.0966667	0.436667	1.82667	3
SMEL_006g264260.1	37.4333	64.7367	98.2833	3
SMEL_006g264430.1	15.7533	2.04333	6.05667	1
SMEL_006g264470.1	54.4967	5.1	18.9167	12
SMEL_006g264690.1	2.13333	0.48	2.18667	8
SMEL_006g264740.1	5.93	11.0967	5.16333	4
SMEL_006g264830.1	14.2533	29.69	31.55	9
SMEL_006g264860.1	6.36333	1.54	4.05667	1
SMEL_006g265020.1	13.69	12.8033	4.14	7
SMEL_006g265090.1	0.0466667	0.9	0.113333	4
SMEL_006g265100.1	4.48	170.997	12.3167	4
SMEL_006g265180.1	7.82333	3.04	2.73333	2
SMEL_006g265260.1	71.2133	176.2	143.783	6
SMEL_006g265390.1	10.9367	19.9967	16.79	6
SMEL_006g265580.1	194.89	57.4967	154.187	11
SMEL_006g265660.1	2.05667	4.46667	4.06333	6
SMEL_006g265680.1	2.59667	1.27333	3.67667	8
SMEL_006g265740.1	55.66	115.643	68.5867	5
SMEL_006g266020.1	7.19	14.4267	16.1767	9
SMEL_006g266130.1	49.4367	30.3733	65.2467	8
SMEL_006g266140.1	8.77667	5.73333	15.21	8
SMEL_006g266210.1	1.90667	0.696667	1.70333	11
SMEL_006g266220.1	1.52	0.516667	1.37667	11
SMEL_006g266270.1	31.3	10.7367	13.1667	12
SMEL_006g266320.1	1.59333	4.52	3.58333	6
SMEL_006g266460.1	138.09	342.767	482.587	9
SMEL_006g266650.1	0.24	0.64	0.716667	9
SMEL_006g266680.1	24.4767	14.6667	6.76	7
SMEL_006g266700.1	49.0567	126.423	170.69	9
SMEL_006g266760.1	40.3367	16.7767	33.8467	11
SMEL_006g266770.1	4.34667	1.50333	2.13333	12
SMEL_006g266850.1	4.07667	1.78	1.73333	2
SMEL_006g266920.1	17.5667	25.1967	50.47	3
SMEL_006g267080.1	3.39667	4.45667	9.79	3
SMEL_006g267120.1	1.63	2.95	0.893333	10
SMEL_006g267380.1	2.73667	3.01667	1.21667	10
SMEL_006g267490.1	3.03	1.34667	2.86	11
SMEL_006g267530.1	189.647	124.343	71.6833	7
SMEL_006g267560.1	4.67667	8.10333	3.53667	4
SMEL_006g267580.1	14.26	50.28	40.0733	6
SMEL_006g267610.1	165.517	259.827	111.607	10
SMEL_006g267730.1	1.98333	0.653333	0.313333	2
SMEL_006g267740.1	26.5667	45.84	52.3033	9
SMEL_006g267750.1	0.393333	1.15333	1.54	9
SMEL_006g267810.1	188.697	296.963	341.683	9
SMEL_006g267880.1	59.12	156.78	123.057	6
SMEL_006g267900.1	2.53333	1.37333	2.89667	8
SMEL_006g267910.1	17.1767	5.78	15.21	11
SMEL_006g267960.1	60.9167	38.8033	23.3633	7
SMEL_006g267970.1	19.3567	7.76667	7.13	2
SMEL_006g267990.1	5.01	11.8567	8.99333	6
SMEL_006g268090.1	97.9	191.123	132.36	5
SMEL_006g268130.1	5.32667	10.8933	6.97	5
SMEL_006g268170.1	34.49	25.6533	7.52	7
SMEL_006g268190.1	1227.88	404.8	567.877	12
SMEL_006g268200.1	164.327	22.01	68.4733	1
SMEL_006g268210.1	5.50667	3.27667	2.43333	2
SMEL_006g268350.1	10.85	39.9733	11.42	4
SMEL_006g268400.1	21.7133	61.58	22.16	4
SMEL_006g268450.1	1.43333	0.896667	1.85333	8
SMEL_006g268510.1	6.69	2.94	5.1	11
SMEL_006g268550.1	177.077	131.587	264.193	8
SMEL_006g268780.1	63.84	23.89	18.2933	2
SMEL_006g268810.1	0.993333	3.01667	0.686667	4
SMEL_006g268820.1	57.2967	129.27	43.01	4
SMEL_006g268970.1	267.283	754.533	467.96	5
SMEL_006g269000.1	9.88	4.25667	5.46	12
SMEL_006g269100.1	110.873	199.343	119.593	4
SMEL_006g269180.1	0.03	0.82	0.103333	4
SMEL_006g269490.1	6.43	3.22667	6.98333	8
SMEL_006g269800.1	2.72667	0.956667	2.05333	11
SMEL_006g269810.1	68.5167	91.5233	38	10
SMEL_006g269870.1	172.98	59.0133	100.797	1
SMEL_006g270270.1	3.61667	1.38	2.46667	1
SMEL_006g270290.1	8.73667	15.48	17.23	9
SMEL_006g270300.1	30.8567	7.58333	21.4633	11
SMEL_006g270330.1	5.78	1.15667	0.963333	2
SMEL_006g270460.1	6.21667	7.40333	13.57	3
SMEL_006g270520.1	25.6633	51.7067	18.6867	4
SMEL_006g270550.1	53.45	423.76	110.677	4
SMEL_006g270570.1	56.6467	148.307	56.43	4
SMEL_006g270580.1	13.7967	46.2767	11.81	4
SMEL_006g270620.1	4.51	0.616667	2.14333	1
SMEL_006g270730.1	195.593	202.367	64.5867	10
SMEL_006g270790.1	19.0233	10.0233	28.71	8
SMEL_006g270800.1	11.9167	19.4167	22.76	9
SMEL_006g270840.1	11.0467	4.10333	10.58	8
SMEL_006g270860.1	2.66333	0.943333	2.63333	8
SMEL_006g270890.1	25.4733	47.8067	19.7367	4
SMEL_007g013040.1	58.5133	86.4533	134.847	3
SMEL_007g013050.1	83.0433	45.57	100.867	8
SMEL_007g271180.1	9.5	19.5567	10.03	4
SMEL_007g271220.1	9.34667	4.99	2.97	7
SMEL_007g271300.1	16.5	25.13	34.19	9
SMEL_007g271770.1	1.9	1.29667	0.773333	7
SMEL_007g271840.1	6.2	11.3267	5.65	4
SMEL_007g271890.1	2.54667	2.41667	1.05667	7
SMEL_007g271990.1	5.69667	0.926667	3.32333	1
SMEL_007g272000.1	0.583333	0.326667	0.85	8
SMEL_007g272010.1	3.54	7.29	9.4	9
SMEL_007g272040.1	3.41333	1.52667	1.88333	12
SMEL_007g272240.1	4.95667	2.96667	1.53667	7
SMEL_007g272250.1	5.82667	7.48333	1.67333	10
SMEL_007g272360.1	9.84	33.2467	17.1033	5
SMEL_007g272410.1	22.44	39.4733	10.1467	10
SMEL_007g272420.1	4.01667	9.50667	3.56	4
SMEL_007g272480.1	5.46333	1.10333	0.713333	2
SMEL_007g272500.1	1.38667	0.44	0.223333	2
SMEL_007g272550.1	11.6433	2.61	2.71667	2
SMEL_007g272580.1	6.16667	2.64333	4.81333	11
SMEL_007g272640.1	0.79	1.65	2.17	9
SMEL_007g272810.1	2.9	0.413333	0.473333	12
SMEL_007g272840.1	1.13333	2.29333	0.826667	4
SMEL_007g272920.1	138.473	247.433	265.547	9
SMEL_007g273120.1	6.25667	2.75333	4.66667	1
SMEL_007g273190.1	1.60667	2.07667	0.966667	10
SMEL_007g273210.1	0.42	1.09	0.593333	5
SMEL_007g273240.1	7.24333	0.783333	0.25	2
SMEL_007g273250.1	5.03333	1.21667	0.713333	2
SMEL_007g273310.1	14.2733	7.36667	15.9333	8
SMEL_007g273430.1	4.28667	12.34	4.05	4
SMEL_007g273440.1	3.89333	9.24333	6.59333	5
SMEL_007g273600.1	79.2567	45.33	21.0833	7
SMEL_007g273620.1	18.7267	10.4267	5.04667	7
SMEL_007g273630.1	3.03667	0.786667	2.68333	11
SMEL_007g273690.1	29.92	126.11	51.4	5
SMEL_007g273700.1	0.833333	6.56	3.28	5
SMEL_007g273880.1	14.9033	23.5167	8.82333	10
SMEL_007g273890.1	45.9367	60.1167	89.9833	3
SMEL_007g274300.1	33.6367	84.2667	102.703	9
SMEL_007g274490.1	0.326667	0.806667	0.11	10
SMEL_007g274690.1	9.47333	2.64	3.96333	12
SMEL_007g274770.1	22.7033	43.8433	26.34	5
SMEL_007g274920.1	26.05	13.4667	9.82	2
SMEL_007g274940.1	2.36333	0.876667	1.85333	11
SMEL_007g275020.1	4.57	9.56333	7.07333	5
SMEL_007g275320.1	1.44667	0.463333	0.756667	1
SMEL_007g275450.1	40.99	16.96	16.0733	2
SMEL_007g275700.1	46.4067	28.6133	20.1067	7
SMEL_007g275860.1	3.59333	1.60333	2.23	1
SMEL_007g275930.1	6.74333	11.9267	4.51667	10
SMEL_007g276030.1	12.5433	34.5867	7.39	4
SMEL_007g276050.1	4.57	9.07667	9.49	9
SMEL_007g276150.1	8.38	16.2	14.3367	6
SMEL_007g276190.1	11.4067	4.03333	1.87	2
SMEL_007g276830.1	7.81333	26.62	8.23333	4
SMEL_007g276840.1	19.6967	12.9133	5.14333	7
SMEL_007g276850.1	0.79	0.0466667	0.103333	12
SMEL_007g276980.1	4.71	0.916667	1.31333	12
SMEL_007g277000.1	4.28333	2.42333	1.79667	2
SMEL_007g277090.1	11.8133	4.75	9.49333	11
SMEL_007g277120.1	4.31	1.64	2.58	1
SMEL_007g277350.1	7.73	11.04	23.45	3
SMEL_007g277360.1	82.36	123.497	174.137	3
SMEL_007g277690.1	10.6833	15.5467	42.7967	3
SMEL_007g277870.1	5.79333	2.82333	2.47333	2
SMEL_007g278420.1	11.5367	3.10333	8.35	11
SMEL_007g278460.1	19.1133	29.4533	37.6667	9
SMEL_007g278470.1	27.4267	40.1067	50.54	9
SMEL_007g279170.1	0.57	1.49	0.71	4
SMEL_007g279400.1	111.45	109.47	46.31	10
SMEL_007g279410.1	24.43	141.137	85.9267	6
SMEL_007g279430.1	2.04	21.46	8.79667	5
SMEL_007g279470.1	43.3433	16.8867	13.4967	2
SMEL_007g279520.1	20.6167	4.23333	5.56667	12
SMEL_007g279530.1	19.0233	5.22667	3.77333	2
SMEL_007g279560.1	0.406667	1.29	0.916667	6
SMEL_007g279580.1	8.73	15.3633	5.83667	10
SMEL_007g279890.1	5.84667	6.74	12.0467	3
SMEL_007g280160.1	0.206667	0.713333	0.76	9
SMEL_007g280200.1	8.81	2.97333	3.86667	12
SMEL_007g280380.1	12.87	23.5833	37.64	3
SMEL_007g281000.1	0.91	3.16667	15.8867	3
SMEL_007g281180.1	7.71	47.4733	18.6567	5
SMEL_007g281410.1	7.3	3.16333	8.15	8
SMEL_007g282020.1	192.73	69.5333	106.237	1
SMEL_007g282250.1	6.71	2.93333	3.18667	12
SMEL_007g282380.1	12.9467	4.95333	5.30667	12
SMEL_007g282430.1	32.16	10.6167	22.1033	1
SMEL_007g282440.1	210.967	102.593	253.163	8
SMEL_007g282500.1	0.996667	1.81	0.943333	4
SMEL_007g282940.1	65.9933	106.547	119.31	9
SMEL_007g283370.1	14.7733	22.0967	40.3533	3
SMEL_007g283420.1	16.7233	7.60333	16.8267	8
SMEL_007g283480.1	101.913	494.583	255.273	5
SMEL_007g283500.1	17.56	3.86333	3.62333	2
SMEL_007g283710.1	1.79	2.93667	0.636667	10
SMEL_007g283770.1	9.03333	15.8133	18.1	9
SMEL_007g283860.1	1.75667	2.01667	0.86	10
SMEL_007g284630.1	65.2133	100.087	170.793	3
SMEL_007g284730.1	97.81	150.71	304.913	3
SMEL_007g285800.1	1.31333	2.94333	2.02333	5
SMEL_007g285870.1	3.51333	8.06	10.9567	9
SMEL_007g285880.1	3.96333	12.1267	10.2733	6
SMEL_007g285900.1	55.5933	14.28	39.98	11
SMEL_007g286300.1	30.82	45.8367	57.3033	9
SMEL_007g286340.1	3.36333	5.74	2.49	4
SMEL_007g286600.1	1.74	5.54333	2.45	5
SMEL_007g286610.1	14.96	35.8767	24.6167	5
SMEL_007g286660.1	19.1267	6.47667	8.14667	12
SMEL_007g286790.1	0.4	0	0.25	11
SMEL_007g286950.1	5.57	9.12	3.34	10
SMEL_007g287090.1	14.5533	7.41667	5.01	2
SMEL_007g287120.1	1.34333	0.956667	2.08	8
SMEL_007g287190.1	1.60667	0.553333	0.583333	12
SMEL_007g287260.1	30.3067	8.97667	8.44333	2
SMEL_007g287350.1	3.93667	6.29333	2.53	10
SMEL_007g287420.1	3.76333	1.5	3.82	8
SMEL_007g287820.1	0.52	0.5	3.21	3
SMEL_007g287850.1	27.8333	56.8933	66.1133	9
SMEL_007g287960.1	33.6167	74.65	53.18	5
SMEL_007g288150.1	0.446667	2.00667	1.06667	5
SMEL_007g288160.1	1.53667	4.22667	1.76333	4
SMEL_007g288170.1	1.41667	3.06	1.08	4
SMEL_007g288180.1	0.546667	1.84333	0.59	4
SMEL_007g288200.1	0.566667	1.32	1.53667	9
SMEL_007g288220.1	9.15667	19.5433	16.4233	6
SMEL_007g288290.1	3.52667	0.776667	1.18667	12
SMEL_007g288300.1	4.16333	0.283333	0.73	12
SMEL_007g288370.1	1.92667	0.306667	0.0433333	2
SMEL_007g288380.1	28.97	75.0367	67.35	6
SMEL_007g288520.1	22.26	9.17333	11.19	12
SMEL_007g288530.1	6.8	3.91667	8.16	8
SMEL_007g288630.1	10.8667	4.67667	8.83	11
SMEL_007g288690.1	2.6	0.94	1.39333	12
SMEL_007g288780.1	1.33667	3.33333	1.25	4
SMEL_007g288790.1	2.21	0.62	1.29	1
SMEL_007g289050.1	23.5233	8.00667	9.61333	12
SMEL_007g289070.1	3.66333	0.363333	0.373333	2
SMEL_007g289100.1	3.36333	8.78333	5.54333	5
SMEL_007g289140.1	1.56333	1.29	2.77	3
SMEL_007g289170.1	46.3733	24.7667	53.71	8
SMEL_007g289230.1	54.7833	96.4633	132.933	9
SMEL_007g289400.1	13.2167	7.34	4.85667	7
SMEL_007g289410.1	1.28667	13.97	6.14	5
SMEL_007g289420.1	62.58	149.573	176.223	9
SMEL_007g289440.1	31.1367	45.47	90.7733	3
SMEL_007g289450.1	1.54333	2.12333	5.58333	3
SMEL_007g289460.1	92.8933	78.2433	212.18	3
SMEL_007g289470.1	129.227	120.077	320.06	3
SMEL_007g289520.1	3.94667	4.70667	16.4833	3
SMEL_007g289570.1	11.11	0.603333	1.58667	12
SMEL_007g289580.1	6.06333	0.23	1.58	12
SMEL_007g289600.1	12.9333	0.38	2.16	12
SMEL_007g289610.1	1.79667	0.0766667	0.24	12
SMEL_007g289620.1	14.2333	53.57	32.73	5
SMEL_007g289650.1	2.47	0.656667	2.13	11
SMEL_007g289770.1	4.81333	2.33667	1.89333	2
SMEL_007g289780.1	3.27667	0.273333	0.143333	2
SMEL_007g289840.1	2.56333	14.84	9.60333	6
SMEL_007g289930.1	0.613333	0.216667	0.106667	2
SMEL_007g290040.1	6.88667	13.3767	14.59	9
SMEL_007g290050.1	2.46333	2.56333	1.07667	10
SMEL_007g290170.1	3.55667	1.07667	1.11	2
SMEL_007g290370.1	40.3833	66.1067	74.42	9
SMEL_007g290380.1	8.35	11.0667	2.15	10
SMEL_007g290470.1	2.81	1.51333	3.07	8
SMEL_007g290520.1	69.7033	138.943	130.783	6
SMEL_007g290530.1	1.46333	0.313333	0.733333	1
SMEL_007g290600.1	3.02667	0.963333	4.08667	8
SMEL_007g290670.1	15.58	6.70333	11.02	1
SMEL_007g290680.1	3.6	1.70333	0.736667	7
SMEL_007g290740.1	11.48	6.43667	2.47	7
SMEL_007g290870.1	0.9	0.293333	0.63	1
SMEL_007g290900.1	11.53	27.08	18.9767	5
SMEL_007g291030.1	23.5633	13.2233	6.78667	7
SMEL_007g291050.1	0.753333	0.51	1.66	3
SMEL_007g291120.1	41.33	19.26	37.96	11
SMEL_007g291180.1	14.43	36.4167	28.06	6
SMEL_007g291250.1	3.12667	1.38333	3.33	8
SMEL_007g291360.1	79.2833	120.303	157.627	9
SMEL_007g291370.1	21.34	35.7567	40.5367	9
SMEL_007g291380.1	2.83333	2.65667	7.48	3
SMEL_007g291480.1	2.67667	1.05333	1.10333	12
SMEL_007g291530.1	1.81667	1.37333	3.56333	3
SMEL_007g291590.1	1.81333	2.8	1.16667	10
SMEL_007g291620.1	8.82333	2.15	3.11667	12
SMEL_007g291630.1	4.09667	1.36667	2.97333	11
SMEL_007g291800.1	3.12667	6.56333	21.5667	3
SMEL_007g291840.1	0.666667	0.0766667	0.2	12
SMEL_007g291900.1	0.4	1.85333	0.266667	4
SMEL_007g291980.1	3.95667	1.58333	4.43	8
SMEL_007g292040.1	27.7	3.59667	20.4833	11
SMEL_007g292070.1	272.497	81.8767	189.23	11
SMEL_007g292170.1	5.87	8.25667	2.32333	10
SMEL_007g292190.1	2.01333	0.69	2.42	8
SMEL_007g292220.1	61.3567	125.75	118.843	6
SMEL_007g292260.1	4.71667	2.46	1.84	2
SMEL_007g292400.1	42.52	67.2433	18.7233	10
SMEL_007g292490.1	1.60667	2.54333	0.67	10
SMEL_007g292660.1	34.9367	13.9333	22.8333	1
SMEL_007g292670.1	25.3767	9.00667	14.7967	1
SMEL_007g292680.1	252.093	100.363	140.867	12
SMEL_007g292700.1	2.77667	0.25	0.316667	12
SMEL_007g292880.1	577.57	901.41	1164.35	9
SMEL_007g292950.1	200.933	370.747	277.657	5
SMEL_007g292960.1	18.1533	9.16	7.92333	2
SMEL_007g293070.1	0.94	4.41333	2.78667	6
SMEL_007g293180.1	135.273	161.307	573.02	3
SMEL_007g293200.1	22.18	80.1867	62.0867	6
SMEL_007g293340.1	14.65	19.85	26.65	3
SMEL_007g293400.1	5.72333	1.63667	1.50667	2
SMEL_007g293410.1	19.59	43.73	56.3633	9
SMEL_007g293680.1	9.98	6.81	14.54	8
SMEL_007g293700.1	26.3933	52.9967	47.2267	6
SMEL_007g293850.1	10.7967	2.73333	6.33	1
SMEL_007g293860.1	3.59667	1.40333	2.91667	11
SMEL_007g293870.1	23.8833	13.1533	9.26333	2
SMEL_007g293980.1	23.6933	9.51	18.2733	11
SMEL_007g294100.1	10.15	19.77	19.4367	6
SMEL_007g294110.1	3.94667	1.17333	1.69667	12
SMEL_007g294130.1	1.25667	0.423333	1.37	8
SMEL_007g294150.1	160.7	678.62	545.973	6
SMEL_007g294260.1	1.52	4.63333	1.21667	4
SMEL_007g294270.1	57.1767	114.93	102.507	6
SMEL_007g294360.1	26.23	11.62	20.6267	11
SMEL_007g294580.1	20.34	47.7767	39.57	6
SMEL_007g294690.1	194.283	350.763	385.07	9
SMEL_007g294740.1	70.9133	130.033	132.3	9
SMEL_007g294770.1	2.52667	9.06	6.96667	6
SMEL_007g294930.1	4.65333	9.55	3.85667	4
SMEL_007g294940.1	19.2067	5.35	12.54	1
SMEL_007g294950.1	9.69333	4.2	3.88	2
SMEL_007g295020.1	47.6767	95.3267	105.72	9
SMEL_007g295140.1	5.40667	5.21	2.43	7
SMEL_007g295280.1	119.16	254.497	219.703	6
SMEL_007g295290.1	82.9967	123.01	164.283	9
SMEL_007g295370.1	97.17	139.433	215.17	3
SMEL_007g295440.1	5.97667	46.5833	21.06	5
SMEL_007g295460.1	20.9333	33.12	38.26	9
SMEL_007g295500.1	61.68	126.25	168.577	9
SMEL_007g295690.1	1.63667	1.73	0.573333	10
SMEL_007g295760.1	11.7333	11.0667	21.49	3
SMEL_007g295800.1	107.06	41.8267	74.0367	1
SMEL_007g295810.1	72.8733	137.1	158.893	9
SMEL_007g295890.1	6.87	2.11	6.87	8
SMEL_007g295910.1	1.57667	0.876667	0.38	7
SMEL_007g295970.1	0.96	0.38	0.31	2
SMEL_007g296080.1	0.946667	1.94667	0.3	10
SMEL_007g296110.1	19.0467	6.26	6.42667	2
SMEL_007g296150.1	8.23	14.08	2.84	10
SMEL_007g296170.1	32.87	12.97	40.01	8
SMEL_007g296510.1	23.5767	7.70667	12.5467	1
SMEL_007g296540.1	37.6467	4.99667	12.8067	12
SMEL_007g296560.1	78.1233	49.72	30.05	7
SMEL_007g296600.1	59.1767	81.34	108.4	3
SMEL_007g296610.1	46.19	48.8533	88.0667	3
SMEL_007g296670.1	21.8667	8.01667	19.6267	11
SMEL_007g296890.1	58.3567	143.857	133.753	6
SMEL_007g296900.1	6.44667	23.6133	10.4567	5
SMEL_007g296930.1	4.13667	1.29333	1.41	12
SMEL_007g296980.1	125.437	445.15	126.123	4
SMEL_007g297190.1	10.5133	33.5367	33.67	6
SMEL_007g297240.1	6.02667	2.46	3.75	1
SMEL_008g297440.1	1.61667	0.653333	1.59	8
SMEL_008g297500.1	1.55	0.06	0.113333	12
SMEL_008g297530.1	1.56	5.46333	3.88	6
SMEL_008g297550.1	3.60667	1.28	1.66667	12
SMEL_008g297590.1	8.13333	45.04	55.25	9
SMEL_008g297600.1	0.12	1.37333	0.633333	5
SMEL_008g297700.1	26.8267	10.3933	18.96	1
SMEL_008g297710.1	3.06	1.79333	4.53333	8
SMEL_008g297730.1	1.09333	0.566667	1.61333	8
SMEL_008g297790.1	3.20667	2.59	0.86	7
SMEL_008g297880.1	8.70667	18.34	15.2167	6
SMEL_008g297900.1	3.29	2.03667	1.43667	7
SMEL_008g297910.1	4.21	1.2	0.556667	2
SMEL_008g297920.1	1.61333	0.19	0.126667	2
SMEL_008g298060.1	23.44	51.14	41.6367	6
SMEL_008g298210.1	1.00667	4.68667	1.37667	4
SMEL_008g298280.1	71.8867	107.767	135.333	9
SMEL_008g298360.1	27.08	13.59	8.03	7
SMEL_008g298650.1	2.71667	8.37333	9.30333	9
SMEL_008g298710.1	3.85	0.993333	2.90667	11
SMEL_008g298740.1	34.29	77.2733	55.61	5
SMEL_008g298780.1	46.6967	17.4967	29.14	1
SMEL_008g298810.1	9.73333	10.9967	5.31667	10
SMEL_008g298840.1	18.04	4.65	5.91667	12
SMEL_008g299070.1	2.27667	0.93	2.14	11
SMEL_008g299130.1	108.63	46.7333	83.92	11
SMEL_008g299140.1	19.6067	12.6967	7.05333	7
SMEL_008g299220.1	13.7333	2.42333	2.57	2
SMEL_008g299320.1	0.563333	2.46667	1.06	5
SMEL_008g299330.1	2.71	8.72	2.82333	4
SMEL_008g299350.1	2.54333	1.07667	1.86	1
SMEL_008g299610.1	5.84	2.51667	2.25667	2
SMEL_008g299660.1	39.97	16.88	18.3233	12
SMEL_008g299860.1	1.90667	14.8367	14.81	6
SMEL_008g299930.1	17.2533	1.06333	18.3267	8
SMEL_008g300130.1	2.86333	1.26	1.97	1
SMEL_008g300190.1	1.48667	3.38667	2.34333	5
SMEL_008g300200.1	3.08	6.62667	1.25667	10
SMEL_008g300340.1	21.3133	13.72	6.39667	7
SMEL_008g300420.1	21.6733	27.3533	12.55	10
SMEL_008g300710.1	1.65	2.55333	3.47667	9
SMEL_008g300760.1	6.86333	0.923333	2.19333	12
SMEL_008g300810.1	3.26	0.646667	0.27	2
SMEL_008g300910.1	13.8067	8.76	5.59667	7
SMEL_008g300920.1	1.58667	3.08	5.48	3
SMEL_008g301070.1	1.56333	0.58	1.16333	11
SMEL_008g301170.1	23.2167	42.1233	60.7067	9
SMEL_008g301220.1	6.93667	17.03	12.1867	6
SMEL_008g301350.1	23.0533	54.05	30.3367	5
SMEL_008g301360.1	9.29333	30.57	14.7133	5
SMEL_008g301410.1	0.126667	2.96333	0.743333	5
SMEL_008g301460.1	6.58333	16.81	11.05	5
SMEL_008g301500.1	2.53333	1.21333	0.693333	7
SMEL_008g301780.1	9.35667	4.07667	7.72667	11
SMEL_008g301800.1	0.796667	1.58667	2.06667	9
SMEL_008g302100.1	9.05	8.25	4.04333	7
SMEL_008g302190.1	63.5667	27.0233	46.65	1
SMEL_008g302290.1	67.0233	21.2567	57.02	11
SMEL_008g302350.1	2.02	0.873333	3.18333	8
SMEL_008g302360.1	272.207	70.5267	144.113	1
SMEL_008g302520.1	0.816667	0.143333	0.41	1
SMEL_008g303420.1	1.77333	3.94333	4.04667	9
SMEL_008g303770.1	13.16	27.6833	10.6133	4
SMEL_008g304030.1	72.63	250.163	217.217	6
SMEL_008g304080.1	82.5067	202.117	212.423	9
SMEL_008g304690.1	15.9567	41.1567	21.8133	5
SMEL_008g305190.1	1.22333	0.186667	0.0266667	2
SMEL_008g305230.1	1.76	0.163333	0.06	2
SMEL_008g305490.1	465.163	192.167	344.98	11
SMEL_008g305540.1	11.0133	1.34333	3.02	12
SMEL_008g305560.1	118.297	22.8733	52.05	1
SMEL_008g305680.1	11.1833	15.4933	23.3967	3
SMEL_008g306630.1	11.2933	6.52333	13.3	8
SMEL_008g307090.1	11.88	24.92	17.62	5
SMEL_008g307100.1	3.58667	10.0267	5.55333	5
SMEL_008g307110.1	7.79	3.35333	7.68333	8
SMEL_008g307140.1	0.786667	1.87	5.48333	3
SMEL_008g307220.1	16.17	10.52	5.25333	7
SMEL_008g307320.1	4.25	5.96333	2.41	10
SMEL_008g307440.1	188.48	79.48	65.8833	2
SMEL_008g307450.1	9.32	1.37333	0.806667	2
SMEL_008g307490.1	8.36333	0.873333	0.583333	2
SMEL_008g307510.1	18.51	1.70667	1.15333	2
SMEL_008g307560.1	32.3033	48.45	58.65	9
SMEL_008g308200.1	148.843	260.813	345.323	9
SMEL_008g308210.1	372.363	819.78	914.883	9
SMEL_008g308240.1	1.09333	0.0266667	0.173333	12
SMEL_008g308330.1	2.55667	0.57	0.613333	12
SMEL_008g308350.1	22.6433	13.67	5.62667	7
SMEL_008g308360.1	8.69667	6.11667	3.31	7
SMEL_008g308380.1	15.3567	14.82	5.62	7
SMEL_008g308510.1	81.5267	19.8033	41.0567	1
SMEL_008g308960.1	0.216667	1.47	0.736667	5
SMEL_008g309000.1	12.1067	7.03333	4.74333	7
SMEL_008g309010.1	6.35667	2.74667	1.77333	2
SMEL_008g309020.1	10.0367	5.38	4.39	2
SMEL_008g309060.1	8.24333	0.263333	2.12	12
SMEL_008g309170.1	8.05	2.35333	1.43333	2
SMEL_008g309400.1	42.33	83.65	50.9	5
SMEL_008g309410.1	24.0567	53.81	22.8133	4
SMEL_008g309580.1	151.437	32.3433	111.65	11
SMEL_008g309600.1	13.6067	6.83333	3.91333	7
SMEL_008g309770.1	33.5267	6.26	21.8767	11
SMEL_008g309870.1	5.34333	4.28333	13.0867	3
SMEL_008g309890.1	141.833	52.9233	90.7567	1
SMEL_008g309970.1	155.733	236.98	292.743	9
SMEL_008g310070.1	40.1133	16.9333	35.9433	11
SMEL_008g310120.1	6.02333	2.47	5.70333	11
SMEL_008g310160.1	4.44	6.03333	2.16333	10
SMEL_008g310240.1	20.1667	1.62667	1.06667	2
SMEL_008g310340.1	5.78667	5.92333	1.62667	10
SMEL_008g310400.1	39.2767	17.3667	26.6	1
SMEL_008g310410.1	1.74333	0.673333	1.3	11
SMEL_008g310600.1	231.943	933.193	240.28	4
SMEL_008g310900.1	12.8533	4.97667	13.7167	8
SMEL_008g310920.1	1.70667	1.39	3.98667	3
SMEL_008g310980.1	19.9433	11.0933	6.92	7
[truncated: 898 more rows]

## Sheet: Sheet1
	R0h	R24h	R48h	RNA_cluster
SMEL_001g115390.1	23.9467	60.3833	133.853	3	RecName: Full=L-ascorbate oxidase homolog; EC=1.10.3.-; AltName: Full=Pollen-specific protein NTP303; Flags: Precursor;	SubName: Full=L-ascorbate oxidase-like protein {ECO:0000313|EMBL:PHT28730.1};
SMEL_001g115480.1	1.18	3.49	6.48333	3	RecName: Full=Serine/threonine-protein kinase STY46 {ECO:0000305}; EC=2.7.11.1 {ECO:0000269|PubMed:17090544}; AltName: Full=Serine/threonine/tyrosine-protein kinase 46 {ECO:0000303|PubMed:16429265};	SubName: Full=Uncharacterized protein {ECO:0000313|EnsemblPlants:PGSC0003DMT400047982};
SMEL_001g116060.1	42.0067	109.783	121.153	9	--	SubName: Full=Uncharacterized protein {ECO:0000313|EMBL:PHT41878.1};
SMEL_001g116140.1	14.2067	26.1433	36.0267	9	RecName: Full=Probable magnesium transporter NIPA6;	RecName: Full=Probable magnesium transporter {ECO:0000256|RuleBase:RU363078};
SMEL_001g116340.1	3.95	6.69333	7.12	9	RecName: Full=Probable pre-mRNA-splicing factor ATP-dependent RNA helicase DEAH5 {ECO:0000305}; EC=3.6.4.13; AltName: Full=DEAH RNA helicase homolog PRP22 {ECO:0000303|PubMed:17008405};	SubName: Full=Uncharacterized protein {ECO:0000313|EnsemblPlants:Solyc01g110990.2.1};
SMEL_001g116480.1	0.35	0.21	2.16667	3	RecName: Full=Auxin-responsive protein SAUR21 {ECO:0000305}; AltName: Full=Protein SMALL AUXIN UP RNA 21 {ECO:0000303|PubMed:12036261};	SubName: Full=Uncharacterized protein {ECO:0000313|EnsemblPlants:PGSC0003DMT400004064};
SMEL_001g116780.1	40.0033	68.0133	75.1267	9	RecName: Full=Kinesin-like protein KIN-7E {ECO:0000305};	RecName: Full=Kinesin-like protein {ECO:0000256|RuleBase:RU000394};
SMEL_001g116900.1	5.52667	5.13333	10.0167	3	RecName: Full=Phosphoglucomutase, cytoplasmic; Short=PGM; EC=5.4.2.2; AltName: Full=Glucose phosphomutase;	SubName: Full=Putative phosphoglucomutase, cytoplasmic-like {ECO:0000313|EMBL:JAP32401.1};
SMEL_001g117220.1	59.0567	101.493	139.537	9	RecName: Full=Chaperone protein dnaJ 10; Short=AtDjC10; Short=AtJ10;	SubName: Full=Uncharacterized protein {ECO:0000313|EnsemblPlants:PGSC0003DMT400079477};
SMEL_001g117250.1	8.86333	9.46667	16.5767	3	RecName: Full=Phosphatidylinositol/phosphatidylcholine transfer protein SFH12; AltName: Full=Protein SEC FOURTEEN HOMOLOGS 12; Short=AtSFH12;	SubName: Full=Phosphatidylinositol/phosphatidylcholine transfer protein SFH3 {ECO:0000313|EMBL:PHT92725.1};
SMEL_001g117800.1	0.106667	0.25	1.26667	3	RecName: Full=Protein DETOXIFICATION 33 {ECO:0000303|PubMed:11739388}; Short=AtDTX33 {ECO:0000303|PubMed:11739388}; AltName: Full=Multidrug and toxic compound extrusion protein 33 {ECO:0000305}; Short=MATE protein 33 {ECO:0000305};	RecName: Full=Protein DETOXIFICATION {ECO:0000256|RuleBase:RU004914}; AltName: Full=Multidrug and toxic compound extrusion protein {ECO:0000256|RuleBase:RU004914};
SMEL_001g117940.1	0.596667	0.98	1.71	3	RecName: Full=Allene oxide synthase 3 {ECO:0000303|PubMed:12351632}; Short=LeAOS3 {ECO:0000303|PubMed:12351632}; EC=4.2.1.92 {ECO:0000269|PubMed:12351632}; AltName: Full=Allene oxide cyclase {ECO:0000303|PubMed:12351632}; EC=5.3.99.6 {ECO:0000269|PubMed:12351632}; AltName: Full=Cytochrome P450 CYP74C3 {ECO:0000303|PubMed:12351632}; AltName: Full=Cytochrome P450 CYP74D1 {ECO:0000303|PubMed:1707379…	SubName: Full=Uncharacterized protein {ECO:0000313|EMBL:PHU10556.1};
SMEL_001g118630.1	25.7533	41.8467	46.4767	9	RecName: Full=Protein CYPRO4;	SubName: Full=Uncharacterized protein {ECO:0000313|EnsemblPlants:PGSC0003DMT400066344};
SMEL_001g118660.1	19.6167	34.4367	48.84	9	RecName: Full=Protein disulfide-isomerase SCO2; EC=5.3.4.1; AltName: Full=Protein SNOWY COTYLEDON 2; Flags: Precursor;	SubName: Full=Uncharacterized protein {ECO:0000313|EnsemblPlants:Solyc01g108200.2.1};
SMEL_001g119010.1	29.8667	81.2333	114.97	9	RecName: Full=CBS domain-containing protein CBSX2, chloroplastic; AltName: Full=CBS domain-containing protein 1; Short=AtCDCP1; AltName: Full=Protein LOSS OF THE TIMING OF ET AND JA BIOSYNTHESIS 1; Short=AtLEJ1; Flags: Precursor;	SubName: Full=Putative CBS domain-containing protein CBSX1, chloroplastic-like {ECO:0000313|EMBL:JAP25338.1};
SMEL_001g119120.1	66.2333	81.57	121.153	3	RecName: Full=C2 domain-containing protein At1g63220;	SubName: Full=Uncharacterized protein {ECO:0000313|EnsemblPlants:Solyc01g107740.2.1};
SMEL_001g119590.1	22.3233	22.41	54.74	3	RecName: Full=LOB domain-containing protein 37; AltName: Full=ASYMMETRIC LEAVES 2-like protein 39; Short=AS2-like protein 39;	SubName: Full=Uncharacterized protein {ECO:0000313|EnsemblPlants:Solyc01g107190.2.1};
SMEL_001g119670.1	127.45	195.507	256.423	9	--	SubName: Full=Uncharacterized protein {ECO:0000313|EnsemblPlants:Solyc01g107090.2.1};
SMEL_001g119680.1	9.87667	20.3233	40.12	3	--	SubName: Full=Uncharacterized protein {ECO:0000313|EnsemblPlants:Solyc01g107090.2.1};
SMEL_001g120030.1	2.27333	8.25	11.3167	9	RecName: Full=Transcription factor bHLH25; AltName: Full=Basic helix-loop-helix protein 25; Short=AtbHLH25; Short=bHLH 25; AltName: Full=Transcription factor EN 29; AltName: Full=bHLH transcription factor bHLH025;	SubName: Full=Uncharacterized protein {ECO:0000313|EnsemblPlants:PGSC0003DMT400013074};
SMEL_001g120310.1	16.64	21.78	38.3433	3	RecName: Full=Agamous-like MADS-box protein AGL21;	SubName: Full=Agamous-like MADS-box protein AGL16 {ECO:0000313|EMBL:PHU10339.1};
SMEL_001g122310.1	8	9.48333	15.1233	3	RecName: Full=Uncharacterized protein At4g06598;	SubName: Full=uncharacterized protein At4g06598 {ECO:0000313|RefSeq:XP_016539048.1};
SMEL_001g122570.1	33.7133	82.82	88.2267	9	--	SubName: Full=Uncharacterized protein {ECO:0000313|EMBL:PHT41574.1};
SMEL_001g123620.1	161.317	322.907	326.253	9	RecName: Full=Endoglucanase 25; EC=3.2.1.4; AltName: Full=Cellulase homolog OR16pep; AltName: Full=Endo-1,4-beta glucanase 25; AltName: Full=Protein KORRIGAN; AltName: Full=Protein RADIALLY SWOLLEN 2;	RecName: Full=Endoglucanase {ECO:0000256|RuleBase:RU361166}; EC=3.2.1.4 {ECO:0000256|RuleBase:RU361166};
SMEL_001g123750.1	36.61	44.9867	71.0567	3	RecName: Full=Glutamate--tRNA ligase, cytoplasmic {ECO:0000305}; EC=6.1.1.17 {ECO:0000305}; AltName: Full=GluRSAt {ECO:0000303|PubMed:9765600}; AltName: Full=Glutamyl-tRNA synthetase {ECO:0000305}; Short=GluRS {ECO:0000305};	SubName: Full=Uncharacterized protein {ECO:0000313|EnsemblPlants:PGSC0003DMT400046948};
SMEL_001g123980.1	87.5467	125.767	165.863	9	RecName: Full=Nuclear envelope-associated protein 2 {ECO:0000303|PubMed:27630107}; Short=AtNEAP2 {ECO:0000303|PubMed:27630107};	SubName: Full=Uncharacterized protein {ECO:0000313|EnsemblPlants:PGSC0003DMT400046977};
SMEL_001g124700.1	110.673	177.277	411.21	3	RecName: Full=Universal stress protein A-like protein;	SubName: Full=universal stress protein A-like protein isoform X1 {ECO:0000313|RefSeq:XP_016495584.1};
SMEL_001g124960.1	57.9767	99.3267	131.703	9	RecName: Full=Probable protein phosphatase 2C 5; Short=AtPP2C05; EC=3.1.3.16;	SubName: Full=Uncharacterized protein {ECO:0000313|EMBL:PHT29072.1};
SMEL_001g125820.1	4.50333	6.95	13.4633	3	RecName: Full=Phosphoglycerate mutase-like protein AT74 {ECO:0000305}; Short=At-74 {ECO:0000303|PubMed:15737980};	SubName: Full=Uncharacterized protein {ECO:0000313|EnsemblPlants:PGSC0003DMT400073541};
SMEL_001g125910.1	1.13333	1.32667	2.42	3	RecName: Full=Kinesin-like protein KIN-1 {ECO:0000305}; AltName: Full=AtKIN-1 {ECO:0000303|PubMed:24667993}; AltName: Full=AtPSS1 {ECO:0000303|PubMed:25330379}; AltName: Full=Pollen semi-sterility protein 1 {ECO:0000305};	SubName: Full=kinesin-1-like protein PSS1 isoform X4 {ECO:0000313|RefSeq:XP_016538519.1};
SMEL_001g126060.1	0.436667	1.44333	1.53667	9	RecName: Full=Alpha-crystallin domain-containing protein 22.3 {ECO:0000303|PubMed:16531488}; Short=AtAcd22.3 {ECO:0000303|PubMed:16531488}; AltName: Full=Increased DNA methylation 2-like protein {ECO:0000305};	SubName: Full=Uncharacterized protein {ECO:0000313|EnsemblPlants:PGSC0003DMT400073582};
SMEL_001g126170.1	288.643	505.17	555.313	9	RecName: Full=Peroxisomal adenine nucleotide carrier 1; Short=GmPNC1;	SubName: Full=Uncharacterized protein {ECO:0000313|EnsemblPlants:PGSC0003DMT400073660};
SMEL_001g126750.1	2.99333	7.35667	30.43	3	RecName: Full=Respiratory burst oxidase homolog protein B; EC=1.11.1.-; EC=1.6.3.-; AltName: Full=NADPH oxidase RBOHB; AltName: Full=StRBOHB;	SubName: Full=respiratory burst oxidase homolog protein B {ECO:0000313|RefSeq:XP_016538659.1};
SMEL_001g126760.1	66.4433	99.8133	138.583	3	RecName: Full=Probable xyloglucan endotransglucosylase/hydrolase 1; Short=LeXTH1; EC=2.4.1.207; Flags: Precursor;	RecName: Full=Xyloglucan endotransglucosylase/hydrolase {ECO:0000256|RuleBase:RU361120}; EC=2.4.1.207 {ECO:0000256|RuleBase:RU361120};
SMEL_001g127250.1	7.32	10.8133	15.23	3	RecName: Full=Perakine reductase; EC=1.1.1.317;	SubName: Full=Uncharacterized protein {ECO:0000313|EnsemblPlants:Solyc01g097390.2.1};
SMEL_001g128270.1	34.88	56.3367	64.58	9	RecName: Full=CDPK-related kinase 3; Short=AtCRK3; EC=2.7.11.1; AltName: Full=Calcium/calmodulin-dependent protein kinase 4; Short=AtCK;	SubName: Full=CDPK-related kinase 4 {ECO:0000313|EMBL:PHT40959.1};
SMEL_001g128440.1	20.0667	30.23	40.8733	9	RecName: Full=U-box domain-containing protein 44; EC=2.3.2.27; AltName: Full=Plant U-box protein 44; AltName: Full=Protein SENESCENCE-ASSOCIATED E3 UBIQUITIN LIGASE 1; AltName: Full=RING-type E3 ubiquitin transferase PUB44 {ECO:0000305};	RecName: Full=RING-type E3 ubiquitin transferase {ECO:0000256|SAAS:SAAS00702733}; EC=2.3.2.27 {ECO:0000256|SAAS:SAAS00702733};
SMEL_001g128620.1	43.67	77.2833	82.51	9	RecName: Full=Transcription factor bHLH13; AltName: Full=Basic helix-loop-helix protein 13; Short=AtbHLH13; Short=bHLH 13; AltName: Full=Transcription factor EN 39; AltName: Full=bHLH transcription factor bHLH013;	SubName: Full=Uncharacterized protein {ECO:0000313|EnsemblPlants:Solyc01g096050.2.1};
SMEL_001g130370.1	0.17	0.983333	1.44667	9	RecName: Full=Homeobox-leucine zipper protein REVOLUTA; AltName: Full=HD-ZIP protein REV; AltName: Full=Homeodomain transcription factor REV; AltName: Full=Protein AMPHIVASAL VASCULAR BUNDLE 1; AltName: Full=Protein INTERFASCICULAR FIBERLESS 1;	SubName: Full=Putative dynamin-related protein 4C-like {ECO:0000313|EMBL:JAP33332.1};
SMEL_001g130440.1	0.06	0.45	0.693333	9	RecName: Full=Cytochrome P450 94A2; EC=1.14.-.-; AltName: Full=P450-dependent fatty acid omega-hydroxylase;	SubName: Full=cytochrome P450 704C1-like isoform X2 {ECO:0000313|RefSeq:XP_016574589.1};
SMEL_001g130760.1	0.73	1.05333	1.39	9	RecName: Full=Homeobox-leucine zipper protein ANTHOCYANINLESS 2; AltName: Full=HD-ZIP protein ANL2; AltName: Full=Homeodomain protein AHDP; AltName: Full=Homeodomain transcription factor ANL2;	SubName: Full=Uncharacterized protein {ECO:0000313|EnsemblPlants:Solyc01g091630.2.1};
SMEL_001g131200.1	6.18667	9.65	11.5767	9	--	SubName: Full=Uncharacterized protein {ECO:0000313|EnsemblPlants:PGSC0003DMT400033257};
SMEL_001g131220.1	19.1567	30.0167	35.0233	9	RecName: Full=Peptidyl-prolyl cis-trans isomerase FKBP43; Short=PPIase FKBP43; EC=5.2.1.8; AltName: Full=FK506-binding protein 43; Short=AtFKBP43; AltName: Full=Immunophilin FKBP43; AltName: Full=Rotamase;	RecName: Full=Peptidylprolyl isomerase {ECO:0000256|PROSITE-ProRule:PRU00277}; EC=5.2.1.8 {ECO:0000256|PROSITE-ProRule:PRU00277};
SMEL_001g131370.1	31.01	39.7633	58.5333	3	RecName: Full=UDP-glucuronate 4-epimerase 2; EC=5.1.3.6; AltName: Full=UDP-glucuronic acid epimerase 2;	SubName: Full=Uncharacterized protein {ECO:0000313|EnsemblPlants:Solyc01g091200.2.1};
SMEL_001g132630.1	2.05333	1.74667	4.79333	3	RecName: Full=Dol-P-Man:Man(7)GlcNAc(2)-PP-Dol alpha-1,6-mannosyltransferase; EC=2.4.1.260; AltName: Full=Alpha-1,6-mannosyltransferase ALG12; AltName: Full=Asparagine-linked glycosylation protein 12; AltName: Full=EMS-mutagenized BRI1 suppressor 4;	RecName: Full=Mannosyltransferase {ECO:0000256|RuleBase:RU363075}; EC=2.4.1.- {ECO:0000256|RuleBase:RU363075};
SMEL_001g132750.1	23.84	39.88	46.7433	9	RecName: Full=Trihelix transcription factor ASIL2 {ECO:0000305}; AltName: Full=6B-interacting protein 1-like 2 {ECO:0000303|PubMed:21330492}; AltName: Full=Trihelix DNA-binding protein ASIL2 {ECO:0000305};	SubName: Full=Putative trihelix transcription factor ASIL2-like {ECO:0000313|EMBL:JAP32851.1};
SMEL_001g133090.1	78.5567	143.587	164.563	9	RecName: Full=Ras-related protein RABH1b; Short=AtRABH1b; AltName: Full=Ras-related protein Rab6A; Short=AtRab6A;	SubName: Full=Uncharacterized protein {ECO:0000313|EnsemblPlants:Solyc01g088560.2.1};
SMEL_001g133130.1	13.1833	13.4967	25.0733	3	--	SubName: Full=Uncharacterized protein {ECO:0000313|EnsemblPlants:Solyc01g088500.2.1};
SMEL_001g133830.1	87.0133	94.76	171.627	3	--	SubName: Full=Uncharacterized protein {ECO:0000313|EMBL:PHT60164.1};
SMEL_001g133860.1	7.59	13.1333	16.78	9	--	SubName: Full=Uncharacterized protein {ECO:0000313|EMBL:PHT60161.1};
SMEL_001g133870.1	89.8667	141.697	181.3	9	--	SubName: Full=Uncharacterized protein {ECO:0000313|EnsemblPlants:PGSC0003DMT400016179};
SMEL_001g134650.1	33	62.2667	81.8633	9	RecName: Full=GTP 3',8-cyclase, mitochondrial; EC=4.1.99.22 {ECO:0000250|UniProtKB:P69848}; AltName: Full=Molybdenum cofactor biosynthesis enzyme CNX2; AltName: Full=Molybdopterin biosynthesis protein CNX2; AltName: Full=Molybdopterin precursor Z synthase; Flags: Precursor;	SubName: Full=Putative cyclic pyranopterin monophosphate synthase, mitochondrial-like {ECO:0000313|EMBL:JAP30158.1};
SMEL_001g134660.1	3.39333	10.3067	14.2467	9	--	SubName: Full=Uncharacterized protein {ECO:0000313|EMBL:PHU30704.1};
SMEL_001g134770.1	66.17	216.143	232.863	9	RecName: Full=Transcription factor bHLH130; AltName: Full=Basic helix-loop-helix protein 130; Short=AtbHLH130; Short=bHLH 130; AltName: Full=Transcription factor EN 69; AltName: Full=bHLH transcription factor bHLH130;	SubName: Full=Putative transcription factor bHLH-like {ECO:0000313|EMBL:JAP28611.1};
SMEL_001g135570.1	37.4767	82.53	164.983	3	RecName: Full=Probable glycerol-3-phosphate dehydrogenase [NAD(+)] 1, cytosolic; EC=1.1.1.8;	RecName: Full=Glycerol-3-phosphate dehydrogenase [NAD(+)] {ECO:0000256|RuleBase:RU361243}; EC=1.1.1.8 {ECO:0000256|RuleBase:RU361243};
SMEL_001g136760.1	66.17	109.14	134.093	9	--	SubName: Full=Uncharacterized protein {ECO:0000313|EMBL:PHT59827.1};
SMEL_001g137090.1	87.35	125.777	166.91	9	--	SubName: Full=Uncharacterized protein {ECO:0000313|EnsemblPlants:PGSC0003DMT400023251};
SMEL_001g137420.1	35.5367	73.3367	91.3833	9	RecName: Full=E3 ubiquitin-protein ligase RHF2A {ECO:0000305}; EC=2.3.2.27; AltName: Full=RING-H2 finger F2a {ECO:0000303|PubMed:9781696}; AltName: Full=RING-H2 zinc finger protein RHF2a {ECO:0000305}; AltName: Full=RING-type E3 ubiquitin transferase RHF2A {ECO:0000305};	SubName: Full=Uncharacterized protein {ECO:0000313|EnsemblPlants:PGSC0003DMT400023302};
SMEL_001g137640.1	2.84333	6.26	9.21333	9	RecName: Full=Basic 7S globulin; AltName: Full=SBg7S; Short=Bg; Contains: RecName: Full=Basic 7S globulin high kDa subunit; Contains: RecName: Full=Basic 7S globulin low kDa subunit; Flags: Precursor;	SubName: Full=Uncharacterized protein {ECO:0000313|EnsemblPlants:PGSC0003DMT400023192};
SMEL_001g137650.1	3.31333	3.58667	8.3	3	RecName: Full=Basic 7S globulin; AltName: Full=SBg7S; Short=Bg; Contains: RecName: Full=Basic 7S globulin high kDa subunit; Contains: RecName: Full=Basic 7S globulin low kDa subunit; Flags: Precursor;	SubName: Full=Uncharacterized protein {ECO:0000313|EnsemblPlants:PGSC0003DMT400023192};
SMEL_001g137660.1	0.03	0.256667	0.586667	3	RecName: Full=Basic 7S globulin; AltName: Full=SBg7S; Short=Bg; Contains: RecName: Full=Basic 7S globulin high kDa subunit; Contains: RecName: Full=Basic 7S globulin low kDa subunit; Flags: Precursor;	SubName: Full=Uncharacterized protein {ECO:0000313|EnsemblPlants:PGSC0003DMT400023190};
SMEL_001g138850.1	1.40333	4.56333	4.81667	9	RecName: Full=Probable galacturonosyltransferase-like 4; EC=2.4.1.-; AltName: Full=Galactinol synthase 9; Short=AtGolS9; Short=GolS-9;	RecName: Full=Hexosyltransferase {ECO:0000256|RuleBase:RU362027}; EC=2.4.1.- {ECO:0000256|RuleBase:RU362027};
SMEL_001g139200.1	227.523	260.857	407.697	3	RecName: Full=Sugar transporter ERD6-like 16;	SubName: Full=Uncharacterized protein {ECO:0000313|EnsemblPlants:PGSC0003DMT400016079};
SMEL_001g140580.1	203.57	217.557	521.997	3	--	SubName: Full=Uncharacterized protein {ECO:0000313|EnsemblPlants:PGSC0003DMT400029479};
SMEL_001g140790.1	27.7433	48.57	51.9967	9	RecName: Full=Vesicle-associated membrane protein 724 {ECO:0000303|PubMed:11115874}; Short=AtVAMP724 {ECO:0000303|PubMed:11115874}; AltName: Full=SYBL1-like protein {ECO:0000303|PubMed:9461215};	SubName: Full=Vesicle-associated membrane protein {ECO:0000313|EMBL:PHT59929.1};
SMEL_001g141890.1	118.88	238.63	242.843	9	RecName: Full=Putative calmodulin-like protein 6;	SubName: Full=Uncharacterized protein {ECO:0000313|EnsemblPlants:PGSC0003DMT400003037};
SMEL_001g142870.1	10.76	19.8067	22.02	9	RecName: Full=TMV resistance protein N;	SubName: Full=Uncharacterized protein {ECO:0000313|EnsemblPlants:PGSC0003DMT400061831};
SMEL_001g143490.1	50.2267	103.93	165.32	9	RecName: Full=Nuclear poly(A) polymerase 3 {ECO:0000303|PubMed:18479511}; Short=PAP(III) {ECO:0000305}; Short=Poly(A) polymerase III {ECO:0000305}; EC=2.7.7.19 {ECO:0000269|PubMed:15297145}; AltName: Full=Polynucleotide adenylyltransferase 3 {ECO:0000305};	SubName: Full=Uncharacterized protein {ECO:0000313|EnsemblPlants:PGSC0003DMT400074732};
SMEL_001g145620.1	19.0967	31.9467	46.6433	9	RecName: Full=Probable boron transporter 2;	SubName: Full=Uncharacterized protein {ECO:0000313|EnsemblPlants:PGSC0003DMT400046120};
SMEL_001g149080.1	0.05	0.206667	0.276667	9	RecName: Full=Probable methyltransferase PMT15; EC=2.1.1.-;	SubName: Full=Uncharacterized protein {ECO:0000313|EnsemblPlants:PGSC0003DMT400030542};
SMEL_001g149320.1	19.51	27.4267	42.58	3	RecName: Full=Uncharacterized protein At2g33490;	SubName: Full=Uncharacterized protein {ECO:0000313|EnsemblPlants:PGSC0003DMT400077141};
SMEL_001g149380.1	23.7533	31.66	75.0433	3	RecName: Full=Glycerophosphodiester phosphodiesterase GDPD3 {ECO:0000305}; EC=3.1.4.46 {ECO:0000250|UniProtKB:Q9SGA2}; AltName: Full=Glycerophosphodiester phosphodiesterase 3 {ECO:0000303|PubMed:21323773}; Short=ATGDPD3 {ECO:0000303|PubMed:21323773};	SubName: Full=Uncharacterized protein {ECO:0000313|EnsemblPlants:PGSC0003DMT400013402};
SMEL_001g149760.1	1.51	2.17333	3.76333	3	RecName: Full=Scarecrow-like protein 3; Short=AtSCL3; AltName: Full=GRAS family protein 5; Short=AtGRAS-5;	SubName: Full=Uncharacterized protein {ECO:0000313|EnsemblPlants:PGSC0003DMT400058477};
SMEL_001g150220.1	52.34	91.08	128.187	9	RecName: Full=NAD(H) kinase 1; Short=AtNADK-1; EC=2.7.1.23; EC=2.7.1.86;	SubName: Full=Uncharacterized protein {ECO:0000313|EnsemblPlants:PGSC0003DMT400027174};
SMEL_001g150580.1	0.573333	0.973333	1.5	3	RecName: Full=Cysteine-rich receptor-like protein kinase 2; Short=Cysteine-rich RLK2; EC=2.7.11.-; Flags: Precursor;	SubName: Full=Cysteine-rich receptor-like protein kinase 2 {ECO:0000313|EMBL:OIT22256.1};
SMEL_001g150610.1	6.94	11.6133	17.7067	3	--	SubName: Full=Uncharacterized protein {ECO:0000313|EnsemblPlants:PGSC0003DMT400042274};
SMEL_001g151390.1	1.97333	1.53667	4.50667	3	RecName: Full=Protein SRC2 homolog {ECO:0000305}; Short=AtSRC2 {ECO:0000303|PubMed:16227454};	SubName: Full=Putative ovule protein {ECO:0000313|EMBL:JAP19109.1};
SMEL_002g153460.1	10.5433	15.05	22.8233	3	RecName: Full=Plant intracellular Ras-group-related LRR protein 4;	SubName: Full=Uncharacterized protein {ECO:0000313|EnsemblPlants:PGSC0003DMT400059678};
SMEL_002g154100.1	91.5767	126.203	173.99	3	RecName: Full=G-type lectin S-receptor-like serine/threonine-protein kinase At4g27290; EC=2.7.11.1; Flags: Precursor;	SubName: Full=Uncharacterized protein {ECO:0000313|EnsemblPlants:PGSC0003DMT400046238};
SMEL_002g155190.1	46.6333	63.9867	90.49	3	--	SubName: Full=Uncharacterized protein {ECO:0000313|EMBL:PHU16552.1};
SMEL_002g156100.1	0.403333	0.356667	1.33667	3	RecName: Full=Premnaspirodiene oxygenase; Short=HPO; EC=1.14.13.121; AltName: Full=Cytochrome P450 71D55;	SubName: Full=5-epiaristolochene 1,3-dihydroxylase {ECO:0000313|EMBL:PHT34787.1};
SMEL_002g156150.1	47.02	93.0167	121.527	9	RecName: Full=Protein EARLY-RESPONSIVE TO DEHYDRATION 7, chloroplastic {ECO:0000303|PubMed:8075396}; Flags: Precursor;	SubName: Full=Uncharacterized protein {ECO:0000313|EnsemblPlants:PGSC0003DMT400061367};
SMEL_002g160980.1	1.91	3.96	4.42667	9	RecName: Full=Lectin {ECO:0000303|PubMed:26597132}; AltName: Full=Agglutinin {ECO:0000303|PubMed:26597132}; Short=LAA {ECO:0000303|PubMed:26597132};	SubName: Full=protein PHLOEM PROTEIN 2-LIKE A1-like {ECO:0000313|RefSeq:XP_016558601.1};
SMEL_002g161630.1	11.53	29.83	38.05	9	RecName: Full=Mitogen-activated protein kinase kinase kinase 17 {ECO:0000303|PubMed:25720833}; EC=2.7.11.25 {ECO:0000250|UniProtKB:Q9ZVP5, ECO:0000255|PROSITE-ProRule:PRU00159};	SubName: Full=Uncharacterized protein {ECO:0000313|EnsemblPlants:PGSC0003DMT400065492};
SMEL_002g162080.1	43.2133	59.2733	92.7233	3	RecName: Full=Cold-regulated 413 plasma membrane protein 2; Short=AtCOR413-PM2;	SubName: Full=Cold-regulated plasma membrane protein 2 {ECO:0000313|EMBL:PHT55146.1};
SMEL_002g162090.1	23.4033	31.7867	50.5033	3	RecName: Full=Cold-regulated 413 plasma membrane protein 2; Short=AtCOR413-PM2;	SubName: Full=Putative ovule protein {ECO:0000313|EMBL:JAP20077.1};
SMEL_002g163420.1	8.42333	12.1833	19.7567	3	RecName: Full=Probable prolyl 4-hydroxylase 7 {ECO:0000305}; Short=AtP4H7 {ECO:0000303|Ref.5}; EC=1.14.11.2 {ECO:0000305};	SubName: Full=Putative prolyl 4-hydroxylase 7 {ECO:0000313|EMBL:PHT89684.1};
SMEL_002g163490.1	1.12667	7.35	17.1567	3	RecName: Full=Plant cysteine oxidase 2 {ECO:0000303|PubMed:24599061}; EC=1.13.11.20;	SubName: Full=Uncharacterized protein {ECO:0000313|EnsemblPlants:PGSC0003DMT400017861};
SMEL_002g163600.1	2.62667	5.28333	5.75667	9	RecName: Full=Putative F-box protein At1g47790;	SubName: Full=Uncharacterized protein {ECO:0000313|EnsemblPlants:PGSC0003DMT400003658};
SMEL_002g163650.1	0.123333	0.273333	0.9	3	RecName: Full=Oleosin 5;	RecName: Full=Oleosin {ECO:0000256|RuleBase:RU000540};
SMEL_002g163970.1	9.27	14.4167	21.71	3	RecName: Full=Protein KINESIN LIGHT CHAIN-RELATED 2 {ECO:0000303|PubMed:23204523}; AltName: Full=Kinesin light chain-like protein 1 {ECO:0000303|Ref.1}; Short=AtKLC1 {ECO:0000303|Ref.1};	SubName: Full=Putative tetratricopeptide repeat protein 28-like {ECO:0000313|EMBL:JAP35629.1};
SMEL_002g164020.1	5.97667	5.94667	11.2233	3	--	SubName: Full=Uncharacterized protein {ECO:0000313|EnsemblPlants:Solyc02g086900.2.1};
SMEL_002g164630.1	27.0367	39.0067	52.1467	9	--	SubName: Full=Uncharacterized protein {ECO:0000313|EnsemblPlants:PGSC0003DMT400003290};
SMEL_002g164760.1	34.9133	78.6033	126.773	9	RecName: Full=Plant cysteine oxidase 2 {ECO:0000303|PubMed:24599061}; EC=1.13.11.20;	SubName: Full=Uncharacterized protein {ECO:0000313|EnsemblPlants:PGSC0003DMT400003317};
SMEL_002g165210.1	3.71	5.22333	6.95	9	RecName: Full=Protein IMPAIRED IN BABA-INDUCED STERILITY 1 {ECO:0000303|PubMed:15722464}; EC=2.7.11.- {ECO:0000255|PROSITE-ProRule:PRU00159};	SubName: Full=Uncharacterized protein {ECO:0000313|EnsemblPlants:PGSC0003DMT400003634};
SMEL_002g165450.1	66.1667	156.907	162.933	9	RecName: Full=Probable galacturonosyltransferase 13; EC=2.4.1.-;	RecName: Full=Hexosyltransferase {ECO:0000256|RuleBase:RU362027}; EC=2.4.1.- {ECO:0000256|RuleBase:RU362027};
SMEL_002g165500.1	1.13	0.446667	3.51333	3	RecName: Full=Zinc finger protein ZAT4;	SubName: Full=Uncharacterized protein {ECO:0000313|EnsemblPlants:Solyc02g088670.1.1};
SMEL_002g165510.1	304.357	553.603	635.37	9	RecName: Full=UDP-glucose 6-dehydrogenase 2; Short=UDP-Glc dehydrogenase 2; Short=UDP-GlcDH 2; Short=UDPGDH 2; EC=1.1.1.22; AltName: Full=At-UGD2;	RecName: Full=UDP-glucose 6-dehydrogenase {ECO:0000256|PIRNR:PIRNR000124}; EC=1.1.1.22 {ECO:0000256|PIRNR:PIRNR000124};
SMEL_002g165700.1	23.8467	41.4867	69.16	3	RecName: Full=Ninja-family protein AFP3; AltName: Full=ABI five-binding protein 3; Short=ABI5-binding protein 3;	SubName: Full=Uncharacterized protein {ECO:0000313|EnsemblPlants:Solyc02g088910.2.1};
SMEL_002g166330.1	120.703	204.027	253.313	9	RecName: Full=Protein trichome birefringence-like 19;	SubName: Full=Uncharacterized protein {ECO:0000313|EnsemblPlants:PGSC0003DMT400026202};
SMEL_002g166360.1	66.07	115.727	139.473	9	--	SubName: Full=Uncharacterized protein {ECO:0000313|EnsemblPlants:PGSC0003DMT400090285};
SMEL_002g166370.1	13.91	17.7467	26.54	3	RecName: Full=Proline-rich receptor-like protein kinase PERK8; EC=2.7.11.1; AltName: Full=Proline-rich extensin-like receptor kinase 8; Short=AtPERK8;	SubName: Full=Putative proline-rich receptor-like protein kinase PERK8-like {ECO:0000313|EMBL:JAP35769.1};
SMEL_002g166490.1	0.796667	1.53667	2.27	9	RecName: Full=Probable galacturonosyltransferase-like 2; EC=2.4.1.-;	RecName: Full=Hexosyltransferase {ECO:0000256|RuleBase:RU362027}; EC=2.4.1.- {ECO:0000256|RuleBase:RU362027};
SMEL_002g166690.1	11.6833	19.4467	28.87	3	RecName: Full=Wall-associated receptor kinase-like 14; EC=2.7.11.-; Flags: Precursor;	SubName: Full=Uncharacterized protein {ECO:0000313|EnsemblPlants:PGSC0003DMT400026001};
SMEL_002g166700.1	2.43	3.08	15.1667	3	--	SubName: Full=Putative ovule protein {ECO:0000313|EMBL:JAP07482.1};
SMEL_002g166890.1	87.2333	144.513	211.607	3	RecName: Full=L-ascorbate oxidase homolog; EC=1.10.3.-; AltName: Full=Pollen-specific protein NTP303; Flags: Precursor;	SubName: Full=Uncharacterized protein {ECO:0000313|EnsemblPlants:PGSC0003DMT400025974};
SMEL_002g166930.1	6.54	8.76667	15.17	3	RecName: Full=Transcription factor HHO5 {ECO:0000305}; AltName: Full=MYB-domain transcription factor HHO5 {ECO:0000305}; AltName: Full=Protein HRS1 HOMOLOG 5 {ECO:0000305}; AltName: Full=Protein ULT1 INTERACTING FACTOR 1 {ECO:0000303|PubMed:26903506};	SubName: Full=Uncharacterized protein {ECO:0000313|EnsemblPlants:PGSC0003DMT400026096};
SMEL_002g167010.1	24.61	50.8733	51.88	9	RecName: Full=Patatin-like protein 3; Short=AtPLP3; EC=3.1.1.-; AltName: Full=Patatin-related phospholipase A IIbeta; Short=pPLAIIb; AltName: Full=Phospholipase A IVC; Short=AtPLAIVC;	SubName: Full=patatin-like protein 3 {ECO:0000313|RefSeq:XP_016561123.1};
SMEL_002g167230.1	10.46	10.5433	20.99	3	--	SubName: Full=Uncharacterized protein {ECO:0000313|EnsemblPlants:PGSC0003DMT400040808};
SMEL_002g167950.1	148.613	196.807	270.67	3	RecName: Full=Glucose-6-phosphate 1-dehydrogenase, cytoplasmic isoform; Short=G6PD; EC=1.1.1.49;	RecName: Full=Glucose-6-phosphate 1-dehydrogenase {ECO:0000256|RuleBase:RU362120}; EC=1.1.1.49 {ECO:0000256|RuleBase:RU362120};
SMEL_002g168020.1	8.54	22.17	77.8033	3	RecName: Full=Kelch repeat-containing protein At3g27220;	SubName: Full=Uncharacterized protein {ECO:0000313|EnsemblPlants:PGSC0003DMT400052239};
SMEL_002g168100.1	11.1867	19.63	22.9833	9	RecName: Full=Probable adenylate kinase 7, mitochondrial; EC=2.7.4.3 {ECO:0000250|UniProtKB:P69441}; AltName: Full=ATP-AMP transphosphorylase 7; AltName: Full=ATP:AMP phosphotransferase; AltName: Full=Adenylate monophosphate kinase 7; Short=AMK7; Flags: Precursor;	SubName: Full=Putative adenylate kinase 7, mitochondrial {ECO:0000313|EMBL:PHT57187.1};
SMEL_002g168190.1	3.13667	3.11333	6.17	3	RecName: Full=Cytochrome P450 94B3 {ECO:0000305}; EC=1.14.14.48 {ECO:0000269|PubMed:21576464, ECO:0000269|PubMed:22215670}; AltName: Full=Jasmonoyl-L-amino acid 12-hydroxylase {ECO:0000303|PubMed:24467969}; AltName: Full=Jasmonoyl-isoleucine-12-hydroxylase {ECO:0000303|PubMed:21849397};	SubName: Full=Uncharacterized protein {ECO:0000313|EnsemblPlants:PGSC0003DMT400052065};
SMEL_002g168250.1	35.22	27.16	54.0933	3	RecName: Full=Ribonucleoside-diphosphate reductase small chain; EC=1.17.4.1; AltName: Full=Ribonucleoside-diphosphate reductase R2 subunit; AltName: Full=Ribonucleotide reductase small subunit;	SubName: Full=Uncharacterized protein {ECO:0000313|EnsemblPlants:Solyc02g094160.1.1};
SMEL_002g168260.1	30.35	49.99	54.68	9	--	SubName: Full=Uncharacterized protein {ECO:0000313|EnsemblPlants:PGSC0003DMT400052062};
SMEL_003g170620.1	11.21	28.1833	32.05	9	RecName: Full=Helicase-like transcription factor CHR28 {ECO:0000305}; EC=3.6.4.- {ECO:0000305}; AltName: Full=Protein CHROMATIN REMODELING 28 {ECO:0000305}; AltName: Full=Protein SNF2-RING-HELICASE-LIKE 2 {ECO:0000303|PubMed:25425661};	SubName: Full=Uncharacterized protein {ECO:0000313|EnsemblPlants:Solyc03g006570.2.1};
SMEL_003g170700.1	6.70333	20.5167	24.5	9	RecName: Full=F-box protein SKIP27; AltName: Full=SKP1-interacting partner 27;	SubName: Full=Uncharacterized protein {ECO:0000313|EMBL:PHT49402.1};
SMEL_003g170990.1	0.943333	1.74	3.29333	3	--	SubName: Full=Uncharacterized protein {ECO:0000313|EnsemblPlants:Solyc03g031630.2.1};
SMEL_003g175630.1	1.97667	2.88667	5.60333	3	RecName: Full=Inorganic phosphate transporter 2-1, chloroplastic; AltName: Full=H(+)/Pi cotransporter; Short=AtPht2;1; Flags: Precursor;	RecName: Full=Phosphate transporter {ECO:0000256|RuleBase:RU363058};
SMEL_003g175640.1	88.6133	163.96	261.767	3	RecName: Full=Beta-arabinofuranosyltransferase RAY1 {ECO:0000305}; EC=2.4.2.- {ECO:0000305}; AltName: Full=Protein REDUCED ARABINOSE YARIV 1 {ECO:0000303|PubMed:23396039};	SubName: Full=beta-arabinofuranosyltransferase RAY1 isoform X2 {ECO:0000313|RefSeq:XP_016554672.1};
SMEL_003g176490.1	10.83	28.9033	30.4467	9	RecName: Full=Probable inactive poly [ADP-ribose] polymerase SRO2; AltName: Full=Protein SIMILAR TO RCD ONE 2;	RecName: Full=Poly [ADP-ribose] polymerase {ECO:0000256|RuleBase:RU362114}; Short=PARP {ECO:0000256|RuleBase:RU362114}; EC=2.4.2.30 {ECO:0000256|RuleBase:RU362114};
SMEL_003g177080.1	4.48	3.59	7.29333	3	RecName: Full=Probable WRKY transcription factor 75; AltName: Full=WRKY DNA-binding protein 75;	SubName: Full=WRKY-type DNA binding protein {ECO:0000313|EMBL:BAC23031.1};
SMEL_003g178110.1	51.6267	110.87	143.587	9	--	--
SMEL_003g178450.1	4.92333	9.03	11.1833	9	--	SubName: Full=Uncharacterized protein {ECO:0000313|EnsemblPlants:PGSC0003DMT400019853};
SMEL_003g178710.1	2.72667	11.91	12.1467	9	RecName: Full=IAA-amino acid hydrolase ILR1-like 4 {ECO:0000303|PubMed:10072397}; EC=3.5.1.- {ECO:0000305}; AltName: Full=jasmonoyl-L-amino acid hydrolase {ECO:0000305}; EC=3.5.1.127 {ECO:0000269|PubMed:24052260}; Flags: Precursor;	SubName: Full=IAA-amino acid hydrolase ILR1-like 4 {ECO:0000313|RefSeq:XP_016548414.1};
SMEL_003g180380.1	44.1367	69.2933	87.7167	9	RecName: Full=Putative calmodulin-like protein 6;	SubName: Full=Uncharacterized protein {ECO:0000313|EnsemblPlants:PGSC0003DMT400003037};
SMEL_003g180610.1	10.08	17.3433	21.81	9	RecName: Full=Pectinesterase inhibitor 4 {ECO:0000305}; AltName: Full=Pectin methylesterase inhibitor 4 {ECO:0000303|PubMed:20819179}; Short=AtPMEI4 {ECO:0000305}; Flags: Precursor;	SubName: Full=Uncharacterized protein {ECO:0000313|EnsemblPlants:PGSC0003DMT400028041};
SMEL_003g180840.1	49.9133	66.2333	95.09	3	RecName: Full=Probable fructokinase-7; EC=2.7.1.4;	SubName: Full=Fructokinase {ECO:0000313|EMBL:AAB57733.1, ECO:0000313|EnsemblPlants:Solyc03g006860.2.1}; EC=2.7.1.4 {ECO:0000313|EMBL:AAB57733.1};
SMEL_003g181020.1	39.8433	83.33	98.1533	9	RecName: Full=Xyloglucan galactosyltransferase XLT2 {ECO:0000305}; EC=2.4.1.- {ECO:0000305}; AltName: Full=Glycosyltransferase 18 {ECO:0000303|PubMed:15020758}; Short=AtGT18 {ECO:0000303|PubMed:15020758}; AltName: Full=Protein XYLOGLUCAN L-SIDE CHAIN GALACTOSYLTRANSFERASE POSITION 2 {ECO:0000303|PubMed:22474179};	SubName: Full=Uncharacterized protein {ECO:0000313|EnsemblPlants:PGSC0003DMT400079639};
SMEL_003g181030.1	1.81667	3.83	4.24333	9	RecName: Full=CDGSH iron-sulfur domain-containing protein NEET; Short=At-NEET;	SubName: Full=CDGSH iron-sulfur domain-containing protein NEET-like {ECO:0000313|RefSeq:XP_016467875.1};
SMEL_003g181460.1	5.37333	11.3967	36.87	3	--	SubName: Full=Uncharacterized protein {ECO:0000313|EnsemblPlants:Solyc03g083500.2.1};
SMEL_003g181740.1	0.336667	1.68667	2.51	9	RecName: Full=Cytochrome P450 714A2; EC=1.14.-.-; AltName: Full=EUI-like P450 A2;	SubName: Full=Uncharacterized protein {ECO:0000313|EnsemblPlants:PGSC0003DMT400086965};
SMEL_003g181850.1	52.5533	71.72	94.2867	3	RecName: Full=Oxalate--CoA ligase {ECO:0000305}; EC=6.2.1.8 {ECO:0000269|PubMed:22447686}; AltName: Full=4-coumarate--CoA ligase isoform 8; Short=At4CL8; AltName: Full=4-coumarate--CoA ligase-like 10; AltName: Full=Acyl-activating enzyme 3 {ECO:0000303|PubMed:22447686}; AltName: Full=Adenosine monophosphate binding protein 3; Short=AtMPBP3; AltName: Full=Oxalyl-CoA synthetase;	SubName: Full=Putative 4-coumarate--CoA ligase-like 10-like {ECO:0000313|EMBL:JAP32208.1};
SMEL_003g183700.1	24.65	49.63	96.1533	3	RecName: Full=SUMO-conjugating enzyme UBC9; EC=2.3.2.-; AltName: Full=RING-type E3 SUMO transferase UBC9; AltName: Full=UBCAT4B; AltName: Full=Ubiquitin carrier protein 9; AltName: Full=Ubiquitin-conjugating enzyme E2 9; AltName: Full=Ubiquitin-conjugating enzyme E2-17 kDa; AltName: Full=Ubiquitin-protein ligase 9;	SubName: Full=Ubiquitin-conjugating enzyme 8-like mRNA {ECO:0000313|EMBL:AFW90582.1};
SMEL_003g184780.1	17.5667	29.77	37.04	9	--	SubName: Full=Uncharacterized protein {ECO:0000313|EnsemblPlants:Solyc03g097260.2.1};
SMEL_003g185510.1	18.9967	59.17	86.48	9	RecName: Full=Uncharacterized calcium-binding protein At1g02270;	SubName: Full=Putative calcium-binding endonuclease/exonuclease/phosphatase family-like {ECO:0000313|EMBL:JAP32773.1};
SMEL_003g185850.1	4.32	4.70667	8.83	3	RecName: Full=Leucine-rich repeat receptor-like protein kinase PEPR1; EC=2.7.11.1; AltName: Full=Elicitor peptide 1 receptor 1; Short=PEP1 receptor 1; Flags: Precursor;	SubName: Full=Uncharacterized protein {ECO:0000313|EnsemblPlants:PGSC0003DMT400008336};
SMEL_003g185880.1	34.0233	68.95	75.4867	9	RecName: Full=CDPK-related kinase 4; Short=AtCRK4; EC=2.7.11.1; AltName: Full=Calcium/calmodulin-dependent protein kinase CRK4;	SubName: Full=Serine/threonine protein kinase pk23 {ECO:0000313|EMBL:AAL87457.1, ECO:0000313|EnsemblPlants:Solyc03g082500.2.1};
SMEL_003g186320.1	13.8833	25.3133	28.1333	9	RecName: Full=Bidirectional sugar transporter SWEET10 {ECO:0000303|PubMed:21107422}; Short=AtSWEET10 {ECO:0000303|PubMed:21107422}; AltName: Full=Protein SUGARS WILL EVENTUALLY BE EXPORTED TRANSPORTERS 10 {ECO:0000303|PubMed:21107422};	RecName: Full=Bidirectional sugar transporter SWEET {ECO:0000256|RuleBase:RU910715};
SMEL_003g186410.1	38.4433	55.2467	85.32	3	RecName: Full=Probable protein S-acyltransferase 7; EC=2.3.1.225; AltName: Full=Probable palmitoyltransferase At3g26935; AltName: Full=Zinc finger DHHC domain-containing protein At3g26935;	RecName: Full=S-acyltransferase {ECO:0000256|RuleBase:RU079119}; EC=2.3.1.225 {ECO:0000256|RuleBase:RU079119}; AltName: Full=Palmitoyltransferase {ECO:0000256|RuleBase:RU079119};
SMEL_003g186890.1	0.28	0.153333	0.65	3	RecName: Full=Non-functional NADPH-dependent codeinone reductase 2; EC=1.1.1.-;	SubName: Full=methylecgonone reductase-like {ECO:0000313|RefSeq:XP_016567711.1};
SMEL_003g186930.1	35.0933	57.35	81.6733	9	RecName: Full=Probable arabinose 5-phosphate isomerase; Short=API; EC=5.3.1.13; AltName: Full=CBS domain-containing protein CBSSIS1;	SubName: Full=Putative arabinose 5-phosphate isomerase-like {ECO:0000313|EMBL:JAP28499.1};
SMEL_003g188220.1	91.3667	157.8	181.967	9	RecName: Full=Transcription factor GTE10; AltName: Full=Bromodomain-containing protein GTE10; AltName: Full=Nuclear protein X1; AltName: Full=Protein GLOBAL TRANSCRIPTION FACTOR GROUP E10;	SubName: Full=Uncharacterized protein {ECO:0000313|EnsemblPlants:PGSC0003DMT400039290};
SMEL_003g188410.1	47.9767	253.493	287.083	9	RecName: Full=Cytochrome P450 94B3 {ECO:0000305}; EC=1.14.14.48 {ECO:0000269|PubMed:21576464, ECO:0000269|PubMed:22215670}; AltName: Full=Jasmonoyl-L-amino acid 12-hydroxylase {ECO:0000303|PubMed:24467969}; AltName: Full=Jasmonoyl-isoleucine-12-hydroxylase {ECO:0000303|PubMed:21849397};	SubName: Full=Cytochrome 94B1 {ECO:0000313|EMBL:PHU16576.1};
SMEL_003g189210.1	6.32667	10.3033	11.3167	9	RecName: Full=Cytochrome P450 71A4; EC=1.14.-.-; AltName: Full=CYPLXXIA4; AltName: Full=Cytochrome P-450EG2;	SubName: Full=Cytochrome 71A4 {ECO:0000313|EMBL:PHT53784.1};
SMEL_003g189310.1	5.56667	7.12333	10.86	3	RecName: Full=Cytochrome P450 71A6; EC=1.14.-.-; Flags: Fragment;	SubName: Full=Cytochrome P450 71A6 {ECO:0000313|EMBL:PHU23673.1};
SMEL_003g189330.1	7.72333	7.89333	18.4067	3	RecName: Full=Quinolinate synthase, chloroplastic; EC=2.5.1.72; AltName: Full=Protein ONSET OF LEAF DEATH 5; AltName: Full=Protein SULFUR E 3; Flags: Precursor;	SubName: Full=Uncharacterized protein {ECO:0000313|EnsemblPlants:PGSC0003DMT400046848};
SMEL_003g190320.1	16.5133	28.7233	34.42	9	RecName: Full=BOI-related E3 ubiquitin-protein ligase 1; EC=2.3.2.27 {ECO:0000269|PubMed:20921156}; AltName: Full=RING-type E3 ubiquitin transferase BRG1 {ECO:0000305};	SubName: Full=Uncharacterized protein {ECO:0000313|EnsemblPlants:PGSC0003DMT400046745};
SMEL_003g190500.1	28.37	79.2167	83.8167	9	RecName: Full=ABC transporter A family member 2; Short=ABC transporter ABCA.2; Short=AtABCA2; AltName: Full=ABC2 homolog 1;	SubName: Full=ABC transporter A family member 2-like {ECO:0000313|RefSeq:XP_016563600.1};
SMEL_003g190540.1	2.67	11.4867	27.25	3	RecName: Full=Plant cysteine oxidase 1 {ECO:0000303|PubMed:24599061}; EC=1.13.11.20; AltName: Full=Hypoxia-responsive unknown protein 29 {ECO:0000303|PubMed:20097791};	SubName: Full=Uncharacterized protein {ECO:0000313|EnsemblPlants:Solyc03g113130.2.1};
SMEL_003g190750.1	17.8667	57.2	63.4133	9	RecName: Full=Protein NRT1/ PTR FAMILY 2.11; Short=AtNPF2.11; AltName: Full=Nitrate transporter 1.10; AltName: Full=Protein GLUCOSINOLATE TRANSPORTER-2;	SubName: Full=Uncharacterized protein {ECO:0000313|EnsemblPlants:PGSC0003DMT400065197};
SMEL_003g190790.1	82.1733	135.967	151.687	9	RecName: Full=Calcium-dependent protein kinase 30; EC=2.7.11.1; AltName: Full=Calcium-dependent protein kinase isoform CDPK1a; Short=AtCDPK1a;	SubName: Full=Calcium-dependent protein kinase 1 {ECO:0000313|EMBL:ABY28389.1};
SMEL_003g191360.1	15.7867	28.3567	37.8667	9	RecName: Full=Calmodulin-binding protein 60 A {ECO:0000303|PubMed:11782485};	SubName: Full=Uncharacterized protein {ECO:0000313|EnsemblPlants:Solyc03g113980.2.1};
SMEL_003g191470.1	41.61	62.6567	94.4733	3	--	SubName: Full=Uncharacterized protein {ECO:0000313|EnsemblPlants:PGSC0003DMT400062926};
SMEL_003g191690.1	73.9633	147.27	307.723	3	RecName: Full=Probable inactive poly [ADP-ribose] polymerase SRO5; AltName: Full=Protein SIMILAR TO RCD ONE 5;	SubName: Full=Uncharacterized protein {ECO:0000313|EnsemblPlants:PGSC0003DMT400063249};
SMEL_003g192130.1	3.26333	2.84	6.24	3	--	SubName: Full=Uncharacterized protein {ECO:0000313|EnsemblPlants:PGSC0003DMT400063311};
SMEL_003g192350.1	0.35	1.26333	1.47333	9	--	SubName: Full=Putative ovule protein {ECO:0000313|EMBL:JAP28803.1};
SMEL_003g192590.1	23.4033	41.2733	45.0267	9	RecName: Full=Plant intracellular Ras-group-related LRR protein 7; AltName: Full=Intracellular Ras-group-related LRR protein 7; Short=OsIRL7;	SubName: Full=Uncharacterized protein {ECO:0000313|EnsemblPlants:PGSC0003DMT400063106};
SMEL_003g193070.1	3.16333	7.52333	8.00667	9	RecName: Full=Agamous-like MADS-box protein AGL65 {ECO:0000305};	SubName: Full=Uncharacterized protein {ECO:0000313|EnsemblPlants:Solyc03g115910.1.1};
SMEL_003g193700.1	1.51667	3.16333	4.1	9	RecName: Full=Pseudo histidine-containing phosphotransfer protein 6 {ECO:0000305}; AltName: Full=Histidine-containing phosphotransfer protein 6;	SubName: Full=Histidine-containing phosphotransfer protein 6 {ECO:0000313|EMBL:OIT08751.1};
SMEL_003g193770.1	10.8067	16.4333	25.7933	3	RecName: Full=Chaperone protein dnaJ A8, chloroplastic {ECO:0000305}; Short=OsDjA8 {ECO:0000303|PubMed:23160806}; Flags: Precursor;	SubName: Full=Putative dnaJ, mitochondrial-like {ECO:0000313|EMBL:JAP30881.1};
SMEL_003g194000.1	2.75	5.53333	6.63333	9	RecName: Full=Probable cyclic nucleotide-gated ion channel 16; AltName: Full=Cyclic nucleotide- and calmodulin-regulated ion channel 16;	SubName: Full=Uncharacterized protein {ECO:0000313|EnsemblPlants:PGSC0003DMT400063232};
SMEL_003g194330.1	2.43667	5.88	6.20333	9	RecName: Full=Ribulose bisphosphate carboxylase/oxygenase activase, chloroplastic; Short=RA; Short=RuBisCO activase; Flags: Precursor;	SubName: Full=Uncharacterized protein {ECO:0000313|EnsemblPlants:Solyc03g117850.2.1};
SMEL_003g194870.1	20.5367	28.0033	37.57	3	--	SubName: Full=Uncharacterized protein {ECO:0000313|EnsemblPlants:PGSC0003DMT400096763};
SMEL_003g194880.1	69.27	131.407	184.2	9	--	SubName: Full=Uncharacterized protein {ECO:0000313|EnsemblPlants:Solyc03g117280.2.1};
SMEL_003g194890.1	12.7167	39.9267	41.76	9	--	SubName: Full=uncharacterized protein YpgQ-like {ECO:0000313|RefSeq:XP_016459830.1, ECO:0000313|RefSeq:XP_016459832.1};
SMEL_003g194900.1	30.66	42.84	77.5133	3	RecName: Full=F-box protein At5g07610;	SubName: Full=Uncharacterized protein {ECO:0000313|EnsemblPlants:PGSC0003DMT400036641};
SMEL_003g194930.1	5.39	10.8767	23.7267	3	RecName: Full=Inositol polyphosphate multikinase beta; EC=2.7.1.140; EC=2.7.1.151; AltName: Full=Inositol polyphosphate 6-/3-/5-kinase beta; Short=AtIpk2-beta; Short=AtIpk2beta;	RecName: Full=Inositol polyphosphate multikinase {ECO:0000256|RuleBase:RU363090}; EC=2.7.1.140 {ECO:0000256|RuleBase:RU363090}; EC=2.7.1.151 {ECO:0000256|RuleBase:RU363090};
SMEL_003g194990.1	5.32	4.63	9.76667	3	RecName: Full=Mitochondrial adenine nucleotide transporter ADNT1; AltName: Full=Adenine nucleotide transporter 1;	SubName: Full=Uncharacterized protein {ECO:0000313|EnsemblPlants:Solyc03g118090.2.1};
SMEL_003g195100.1	34.4367	58.4867	83.21	9	RecName: Full=Protein BONZAI 1; AltName: Full=COPINE 1;	SubName: Full=Uncharacterized protein {ECO:0000313|EnsemblPlants:Solyc03g118200.2.1};
SMEL_003g195460.1	366.397	430.307	849.89	3	RecName: Full=LOB domain-containing protein 41; AltName: Full=ASYMMETRIC LEAVES 2-like protein 38; Short=AS2-like protein 38;	SubName: Full=LOB domain protein 40 {ECO:0000313|EMBL:AFW90574.1};
SMEL_003g195480.1	2.83	4.32667	6.45	3	--	SubName: Full=Uncharacterized protein {ECO:0000313|EnsemblPlants:Solyc03g119500.1.1};
SMEL_003g195780.1	15.19	36.5267	54.46	9	RecName: Full=LEAF RUST 10 DISEASE-RESISTANCE LOCUS RECEPTOR-LIKE PROTEIN KINASE-like 1.2 {ECO:0000303|PubMed:12805585}; EC=2.7.11.1; AltName: Full=Probable receptor-like serine/threonine-protein kinase LRK10L-1.2 {ECO:0000305}; Flags: Precursor;	SubName: Full=Uncharacterized protein {ECO:0000313|EnsemblPlants:PGSC0003DMT400014682};
SMEL_003g195790.1	22.7233	46.0633	68.04	9	RecName: Full=LEAF RUST 10 DISEASE-RESISTANCE LOCUS RECEPTOR-LIKE PROTEIN KINASE-like 1.2 {ECO:0000303|PubMed:12805585}; EC=2.7.11.1; AltName: Full=Probable receptor-like serine/threonine-protein kinase LRK10L-1.2 {ECO:0000305}; Flags: Precursor;	SubName: Full=Uncharacterized protein {ECO:0000313|EnsemblPlants:PGSC0003DMT400014678};
SMEL_003g195950.1	1.77	4.13333	6.78667	9	RecName: Full=Protein MOTHER of FT and TFL1;	SubName: Full=Uncharacterized protein {ECO:0000313|EnsemblPlants:PGSC0003DMT400014409};
SMEL_003g196120.1	0.71	0.503333	1.57667	3	--	SubName: Full=Uncharacterized protein {ECO:0000313|EnsemblPlants:PGSC0003DMT400014442};
SMEL_003g196440.1	109.83	247.153	281.877	9	RecName: Full=Protein TIFY 6B; AltName: Full=Jasmonate ZIM domain-containing protein 3; AltName: Full=Protein JASMONATE INSENSITIVE 3;	SubName: Full=Uncharacterized protein PPS3 {ECO:0000313|EMBL:BAD04851.1};
SMEL_003g196980.1	42.6567	74.4533	77.2133	9	RecName: Full=Protein STRUBBELIG-RECEPTOR FAMILY 6; AltName: Full=Leucine-rich repeat receptor kinase-like protein SRF6; Flags: Precursor;	SubName: Full=Uncharacterized protein {ECO:0000313|EnsemblPlants:PGSC0003DMT400023732};
SMEL_003g197100.1	30.8267	40.2833	65.7167	3	RecName: Full=Pectinesterase 3; Short=PE 3; EC=3.1.1.11; AltName: Full=Pectin methylesterase 3; Flags: Precursor;	RecName: Full=Pectinesterase {ECO:0000256|RuleBase:RU000589}; EC=3.1.1.11 {ECO:0000256|RuleBase:RU000589};
SMEL_003g197110.1	3.60333	4.31667	7.25	3	RecName: Full=Alanine aminotransferase 2, mitochondrial; Short=AtAlaAT2; Short=AtAlaATm; EC=2.6.1.2; AltName: Full=Alanine-2-oxoglutarate aminotransferase 3; EC=2.6.1.-; Flags: Precursor;	SubName: Full=Uncharacterized protein {ECO:0000313|EnsemblPlants:Solyc03g123610.2.1};
SMEL_003g197270.1	10.6167	22.1333	33.98	9	RecName: Full=Protein MARD1 {ECO:0000303|PubMed:15159630}; AltName: Full=Mediator of ABA-regulated dormancy1 {ECO:0000303|PubMed:15159630}; AltName: Full=Senescence-associated protein SAG102 {ECO:0000303|PubMed:11402199};	SubName: Full=Putative ovule protein {ECO:0000313|EMBL:JAP16504.1};
SMEL_003g197290.1	0.306667	0.613333	0.876667	9	RecName: Full=AP2-like ethylene-responsive transcription factor AIL1; AltName: Full=Protein AINTEGUMENTA-LIKE 1;	SubName: Full=Putative AP2-like ethylene-responsive transcription factor AIL1-like {ECO:0000313|EMBL:JAP28704.1};
SMEL_003g197510.1	173.41	282.36	419.27	3	RecName: Full=Protein TIFY 11B; AltName: Full=Jasmonate ZIM domain-containing protein 6;	SubName: Full=Uncharacterized protein {ECO:0000313|EnsemblPlants:PGSC0003DMT400058918};
SMEL_003g198270.1	7.55333	11.74	16.4267	9	RecName: Full=NADH dehydrogenase [ubiquinone] iron-sulfur protein 7, mitochondrial; EC=1.6.5.3; EC=1.6.99.3; Flags: Precursor;	SubName: Full=NADH dehydrogenase [ubiquinone] iron-sulfur protein 7, mitochondrial-like isoform X1 {ECO:0000313|RefSeq:XP_009790602.1};
SMEL_003g198400.1	35.4133	49.3533	67.5733	3	RecName: Full=IAA-amino acid hydrolase ILR1-like 4 {ECO:0000303|PubMed:10072397}; EC=3.5.1.- {ECO:0000305}; AltName: Full=jasmonoyl-L-amino acid hydrolase {ECO:0000305}; EC=3.5.1.127 {ECO:0000269|PubMed:24052260}; Flags: Precursor;	SubName: Full=Uncharacterized protein {ECO:0000313|EnsemblPlants:PGSC0003DMT400006691};
SMEL_003g198640.1	16.9967	23.22	35.97	3	RecName: Full=NADP-dependent malic enzyme; Short=NADP-ME; EC=1.1.1.40;	RecName: Full=Malic enzyme {ECO:0000256|RuleBase:RU003426};
SMEL_003g198890.1	10.3033	24.8533	30.55	9	--	SubName: Full=Uncharacterized protein {ECO:0000313|EnsemblPlants:Solyc03g120770.2.1};
SMEL_003g199340.1	33.0033	29.34	78.68	3	RecName: Full=Coatomer subunit beta'-3; AltName: Full=Beta'-coat protein 3; Short=Beta'-COP 3;	SubName: Full=coatomer subunit beta'-1-like {ECO:0000313|RefSeq:XP_016552707.1};
SMEL_004g200010.1	842.543	1267.96	1529.34	9	RecName: Full=Ubiquitin-conjugating enzyme E2 28; EC=2.3.2.23; AltName: Full=AtUBC9A {ECO:0000303|PubMed:12226665}; AltName: Full=E2 ubiquitin-conjugating enzyme 28; AltName: Full=Ubiquitin carrier protein 28;	SubName: Full=Ubiquitin-conjugating enzyme E2-17 kDa {ECO:0000313|EMBL:ASZ85193.1};
SMEL_004g200600.1	20.76	38.1433	56.7033	9	RecName: Full=Transcription factor bHLH14; AltName: Full=Basic helix-loop-helix protein 14; Short=AtbHLH14; Short=bHLH 14; AltName: Full=Transcription factor EN 33; AltName: Full=bHLH transcription factor bHLH014;	SubName: Full=Uncharacterized protein {ECO:0000313|EnsemblPlants:PGSC0003DMT400014097};
SMEL_004g200770.1	22.2267	32.1567	46.0233	3	RecName: Full=Oxygen-dependent coproporphyrinogen-III oxidase, chloroplastic; Short=Coprogen oxidase; Short=Coproporphyrinogenase; EC=1.3.3.3; Flags: Precursor;	SubName: Full=Uncharacterized protein {ECO:0000313|EnsemblPlants:Solyc10g005110.2.1};
SMEL_004g201870.1	43.6767	53.85	86.7567	3	RecName: Full=Formin-like protein 5; Short=AtFH5; Short=AtFORMIN-5; AltName: Full=Formin homology 2 domain-containing protein 5;	RecName: Full=Formin-like protein {ECO:0000256|RuleBase:RU361260};
SMEL_004g203250.1	9.29	17.0167	18.0033	9	RecName: Full=Cytochrome P450 CYP72A219; EC=1.14.-.-; AltName: Full=Cytochrome P450 CYP72A129;	SubName: Full=Secologanin synthase {ECO:0000313|EMBL:PHT97624.1};
SMEL_004g205760.1	58.8033	103.647	114.917	9	--	SubName: Full=Uncharacterized protein {ECO:0000313|EnsemblPlants:Solyc10g012080.2.1};
SMEL_004g207480.1	7.14333	8.39	12.8833	3	RecName: Full=Phosphatidylinositol 4-phosphate 5-kinase 1; Short=AtPIP5K1; EC=2.7.1.68; AltName: Full=1-phosphatidylinositol 4-phosphate kinase 1; AltName: Full=Diphosphoinositide kinase 1; AltName: Full=PtdIns(4)P-5-kinase 1;	SubName: Full=Uncharacterized protein {ECO:0000313|EnsemblPlants:Solyc10g061960.1.1};
SMEL_004g207730.1	28.86	44.2333	68.3967	3	--	SubName: Full=Uncharacterized protein {ECO:0000313|EnsemblPlants:Solyc10g045600.1.1};
SMEL_004g208790.1	80.78	167.527	199.183	9	RecName: Full=Heterogeneous nuclear ribonucleoprotein Q {ECO:0000305}; Short=hnRNP Q {ECO:0000305}; AltName: Full=Protein LHP1-INTERACTING FACTOR 2 {ECO:0000303|PubMed:21304947};	SubName: Full=Uncharacterized protein {ECO:0000313|EnsemblPlants:PGSC0003DMT400008962};
SMEL_004g209040.1	27.3767	36.3133	76.43	3	RecName: Full=Protein NRT1/ PTR FAMILY 7.3; Short=AtNPF7.3; AltName: Full=Nitrate transporter 1.5;	SubName: Full=Uncharacterized protein {ECO:0000313|EnsemblPlants:PGSC0003DMT400061974};
SMEL_004g210000.1	208.62	242.067	388.33	3	RecName: Full=Nitrate reductase [NADH]; Short=NR; EC=1.7.1.1;	RecName: Full=Nitrate reductase {ECO:0000256|PIRNR:PIRNR000233};
SMEL_004g211350.1	9.69667	16.48	17.7433	9	RecName: Full=Glutathione S-transferase TCHQD; EC=2.5.1.18; AltName: Full=Protein tetrachlorohydroquinone dehalogenase-homolog;	SubName: Full=Uncharacterized protein {ECO:0000313|EnsemblPlants:PGSC0003DMT400065150};
SMEL_004g212530.1	89.77	134.703	221.697	3	RecName: Full=Alcohol dehydrogenase 1 {ECO:0000303|PubMed:1678286}; EC=1.1.1.1 {ECO:0000269|PubMed:1678286};	SubName: Full=Uncharacterized protein {ECO:0000313|EnsemblPlants:PGSC0003DMT400063937};
SMEL_004g214140.1	45.1333	92.11	97.1033	9	--	SubName: Full=Uncharacterized protein {ECO:0000313|EMBL:PHT50566.1};
SMEL_004g214460.1	0.59	1.09667	1.43333	9	RecName: Full=Polyadenylate-binding protein 5; Short=PABP-5; Short=Poly(A)-binding protein 5;	RecName: Full=Polyadenylate-binding protein {ECO:0000256|RuleBase:RU362004}; Short=PABP {ECO:0000256|RuleBase:RU362004};
SMEL_004g215020.1	2.77667	4.85667	5.92667	9	RecName: Full=Uncharacterized aarF domain-containing protein kinase At1g71810, chloroplastic; EC=2.7.-.-; Flags: Precursor;	SubName: Full=Uncharacterized protein {ECO:0000313|EnsemblPlants:Solyc04g072230.2.1};
SMEL_004g215760.1	41.5267	66.5333	105.46	3	RecName: Full=Probable trehalose-phosphate phosphatase I; Short=AtTPPI; EC=3.1.3.12; AltName: Full=Trehalose 6-phosphate phosphatase;	RecName: Full=Trehalose 6-phosphate phosphatase {ECO:0000256|RuleBase:RU361117}; EC=3.1.3.12 {ECO:0000256|RuleBase:RU361117};
SMEL_004g216240.1	2.48	2.89	6.47	3	RecName: Full=Probable RNA-binding protein ARP1; AltName: Full=ABA-regulated RNA-binding protein 1 {ECO:0000303|PubMed:23040517};	SubName: Full=RNA-binding protein 24-B-like {ECO:0000313|RefSeq:XP_016569215.1};
SMEL_004g216410.1	36.4533	96.37	116.15	9	RecName: Full=F-box protein At1g78280;	SubName: Full=Uncharacterized protein {ECO:0000313|EnsemblPlants:Solyc04g074490.2.1};
SMEL_004g216570.1	13.0233	23.6433	25.5533	9	--	RecName: Full=Queuine tRNA-ribosyltransferase catalytic subunit 1 {ECO:0000256|HAMAP-Rule:MF_03218}; AltName: Full=Guanine insertion enzyme {ECO:0000256|HAMAP-Rule:MF_03218}; AltName: Full=tRNA-guanine transglycosylase {ECO:0000256|HAMAP-Rule:MF_03218};
SMEL_004g216640.1	7.06	12.54	15.7	9	--	SubName: Full=Uncharacterized protein {ECO:0000313|EnsemblPlants:PGSC0003DMT400079242};
SMEL_004g216790.1	83.1067	141.28	162.19	9	RecName: Full=Rhodanese-like domain-containing protein 6; AltName: Full=Sulfurtransferase 6; Short=AtStr6;	SubName: Full=Serine hydrolase FSH {ECO:0000313|EMBL:OMO56161.1};
SMEL_004g217020.1	6.12	16.2667	26.64	9	RecName: Full=AT-hook motif nuclear-localized protein 17 {ECO:0000312|EMBL:FAA00288.1};	SubName: Full=AT-hook motif nuclear-localized protein 17 {ECO:0000313|RefSeq:XP_016569035.1};
SMEL_004g217170.1	0.623333	0.69	1.31	3	RecName: Full=Protein NETWORKED 2A {ECO:0000303|PubMed:22840520};	SubName: Full=Uncharacterized protein {ECO:0000313|EnsemblPlants:PGSC0003DMT400024223};
SMEL_004g217680.1	6.74333	9.46667	18.96	3	RecName: Full=Transcription factor bHLH93; AltName: Full=Basic helix-loop-helix protein 93; Short=AtbHLH93; Short=bHLH 93; AltName: Full=Transcription factor EN 47; AltName: Full=bHLH transcription factor bHLH093;	SubName: Full=transcription factor bHLH93-like {ECO:0000313|RefSeq:XP_016571505.1};
SMEL_004g217740.1	12.7433	17.93	24.4567	3	RecName: Full=Probable beta-1,4-xylosyltransferase IRX9H; EC=2.4.2.-; AltName: Full=Protein IRREGULAR XYLEM 9 homolog; AltName: Full=Xylan xylosyltransferase IRX9H;	RecName: Full=Glycosyltransferases {ECO:0000256|RuleBase:RU363127}; EC=2.4.-.- {ECO:0000256|RuleBase:RU363127};
SMEL_004g217780.1	7.63	17.3967	26.7633	9	RecName: Full=Protein DOG1-like 4 {ECO:0000303|PubMed:17065317};	SubName: Full=Uncharacterized protein {ECO:0000313|EnsemblPlants:Solyc04g076970.2.1};
SMEL_004g217930.1	8.22	14.2567	19.36	9	--	SubName: Full=Uncharacterized protein {ECO:0000313|EnsemblPlants:Solyc04g077140.2.1};
SMEL_004g218270.1	63.28	94.0033	177.37	3	RecName: Full=Probable xyloglucan glycosyltransferase 12; EC=2.4.1.-; AltName: Full=Cellulose synthase-like protein C12; Short=AtCslC12;	SubName: Full=Uncharacterized protein {ECO:0000313|EnsemblPlants:Solyc04g077470.2.1};
SMEL_004g218320.1	3.58	4.31	6.52	3	RecName: Full=Growth-regulating factor 6; Short=OsGRF6; AltName: Full=Transcription activator GRF6;	SubName: Full=Uncharacterized protein {ECO:0000313|EnsemblPlants:Solyc04g077510.2.1};
SMEL_004g218450.1	78.64	54.6733	141.393	3	--	SubName: Full=Uncharacterized protein {ECO:0000313|EnsemblPlants:PGSC0003DMT400012663};
SMEL_004g218680.1	48.5433	86.7533	106.143	9	--	SubName: Full=Uncharacterized protein {ECO:0000313|EnsemblPlants:PGSC0003DMT400055388};
SMEL_004g218770.1	0.286667	0.28	0.823333	3	RecName: Full=Peroxisomal membrane protein PMP22; AltName: Full=22 kDa peroxisomal membrane protein;	SubName: Full=PXMP2/4 family protein 4-like {ECO:0000313|RefSeq:XP_009773425.1};
SMEL_004g219020.1	0.97	3.34333	3.54333	9	RecName: Full=Cytochrome P450 81E8 {ECO:0000303|PubMed:14617078}; EC=1.14.13.- {ECO:0000305};	SubName: Full=Uncharacterized protein {ECO:0000313|EMBL:PHT84590.1};
SMEL_004g219030.1	0.46	1.30667	1.75333	9	RecName: Full=Cytochrome P450 81E8 {ECO:0000303|PubMed:14617078}; EC=1.14.13.- {ECO:0000305};	SubName: Full=Uncharacterized protein {ECO:0000313|EnsemblPlants:Solyc04g078340.2.1};
SMEL_004g219250.1	4.51	9.99	14.2367	9	RecName: Full=Probable isoaspartyl peptidase/L-asparaginase 2; EC=3.4.19.5; AltName: Full=L-asparagine amidohydrolase 2; Contains: RecName: Full=Isoaspartyl peptidase/L-asparaginase 2 subunit alpha; Contains: RecName: Full=Isoaspartyl peptidase/L-asparaginase 2 subunit beta; Flags: Precursor;	SubName: Full=Isoaspartyl peptidase/L-asparaginase {ECO:0000313|EMBL:PHU20753.1};
SMEL_004g219260.1	143.6	199.473	296.047	3	RecName: Full=Probable isoaspartyl peptidase/L-asparaginase 2; EC=3.4.19.5; AltName: Full=L-asparagine amidohydrolase 2; Contains: RecName: Full=Isoaspartyl peptidase/L-asparaginase 2 subunit alpha; Contains: RecName: Full=Isoaspartyl peptidase/L-asparaginase 2 subunit beta; Flags: Precursor;	SubName: Full=Isoaspartyl peptidase/L-asparaginase {ECO:0000313|EMBL:PHU20753.1};
SMEL_004g219290.1	423.45	950.187	992.653	9	RecName: Full=Transcription factor MYB73 {ECO:0000303|PubMed:11597504}; AltName: Full=Myb-related protein 73 {ECO:0000303|PubMed:11597504}; Short=AtMYB73 {ECO:0000303|PubMed:11597504};	SubName: Full=Uncharacterized protein {ECO:0000313|EnsemblPlants:Solyc04g078420.1.1};
SMEL_004g219370.1	0.84	1.11333	1.81	3	RecName: Full=Uncharacterized acetyltransferase At3g50280; EC=2.3.1.-;	SubName: Full=Uncharacterized protein {ECO:0000313|EnsemblPlants:PGSC0003DMT400084781};
SMEL_004g219440.1	52.4733	108.983	147.237	9	--	SubName: Full=uncharacterized protein LOC107823438 {ECO:0000313|RefSeq:XP_016505564.1};
SMEL_004g219560.1	35.5467	45.34	65.5233	3	RecName: Full=Probable serine/threonine protein kinase IRE {ECO:0000305}; EC=2.7.11.1 {ECO:0000305}; AltName: Full=Protein INCOMPLETE ROOT HAIR ELONGATION {ECO:0000303|PubMed:12000677}; Short=AtIRE {ECO:0000303|PubMed:17237187};	SubName: Full=Uncharacterized protein {ECO:0000313|EnsemblPlants:PGSC0003DMT400020578};
SMEL_004g219850.1	34.3067	77.2933	104.647	9	RecName: Full=Probable protein phosphatase 2C 12; Short=AtPP2C12; EC=3.1.3.16;	SubName: Full=Uncharacterized protein {ECO:0000313|EnsemblPlants:Solyc04g079120.2.1};
SMEL_004g219960.1	32.7733	33.1533	64.8	3	RecName: Full=Mitogen-activated protein kinase kinase kinase 5 {ECO:0000303|PubMed:27679653}; EC=2.7.11.25 {ECO:0000269|PubMed:27679653}; AltName: Full=MAP3K gamma protein kinase {ECO:0000303|PubMed:10095117}; Short=AtMAP3Kgamma {ECO:0000303|PubMed:10095117};	SubName: Full=Uncharacterized protein {ECO:0000313|EnsemblPlants:Solyc04g079400.2.1};
SMEL_004g220010.1	24.8567	34.2133	50.93	3	--	SubName: Full=Uncharacterized protein {ECO:0000313|EnsemblPlants:Solyc04g079350.1.1};
SMEL_004g220130.1	2.03667	1.63667	3.21667	3	RecName: Full=Patatin-like protein 2; Short=AtPLP2; EC=3.1.1.-; AltName: Full=Patatin-related phospholipase A IIalpha; Short=pPLAIIa; AltName: Full=Phospholipase A IIA; Short=AtPLAIIA;	RecName: Full=Patatin {ECO:0000256|RuleBase:RU361262}; EC=3.1.1.- {ECO:0000256|RuleBase:RU361262};
SMEL_004g220440.1	2.56	3.84667	4.66667	9	--	SubName: Full=Uncharacterized protein {ECO:0000313|EMBL:PHT51097.1};
SMEL_004g220520.1	26.7267	52.4267	62.1933	9	RecName: Full=Probable galacturonosyltransferase-like 1; EC=2.4.1.-; AltName: Full=Protein GAOLAOZHUANGREN 1; AltName: Full=Protein PARVUS;	RecName: Full=Hexosyltransferase {ECO:0000256|RuleBase:RU362027}; EC=2.4.1.- {ECO:0000256|RuleBase:RU362027};
SMEL_004g221960.1	1.91333	2.62333	4.50333	3	RecName: Full=Auxin-responsive protein SAUR50 {ECO:0000303|PubMed:12036261}; AltName: Full=Protein SMALL AUXIN UP RNA 50 {ECO:0000303|PubMed:12036261};	SubName: Full=Uncharacterized protein {ECO:0000313|EnsemblPlants:PGSC0003DMT400086212};
SMEL_004g222220.1	63.0767	127.677	146.493	9	--	SubName: Full=uncharacterized protein LOC107866874 {ECO:0000313|RefSeq:XP_016568366.1, ECO:0000313|RefSeq:XP_016568367.1};
SMEL_004g222330.1	10.79	24.8167	28.1367	9	--	SubName: Full=Uncharacterized protein {ECO:0000313|EnsemblPlants:PGSC0003DMT400025766};
SMEL_004g222530.1	19.71	46.7	58.9167	9	RecName: Full=Calcium-dependent protein kinase 29; EC=2.7.11.1;	SubName: Full=Uncharacterized protein {ECO:0000313|EnsemblPlants:PGSC0003DMT400025581};
SMEL_004g222640.1	33.99	54.5233	80.6967	3	RecName: Full=Phospholipase D delta {ECO:0000303|PubMed:11891260}; Short=AtPLDdelta {ECO:0000303|PubMed:11891260}; Short=PLD delta {ECO:0000303|PubMed:11891260}; EC=3.1.4.4 {ECO:0000269|PubMed:11706190, ECO:0000269|PubMed:12397060};	RecName: Full=Phospholipase D {ECO:0000256|PIRNR:PIRNR036470}; EC=3.1.4.4 {ECO:0000256|PIRNR:PIRNR036470};
SMEL_004g222770.1	52.8567	94.6767	149.49	3	RecName: Full=L-ascorbate oxidase homolog; EC=1.10.3.-; Flags: Precursor;	SubName: Full=Putative L-ascorbate oxidase-like {ECO:0000313|EMBL:JAP31608.1};
SMEL_004g222830.1	0.716667	0.916667	1.69333	3	RecName: Full=Lysine histidine transporter-like 8; AltName: Full=Amino acid transporter-like protein 1;	SubName: Full=Uncharacterized protein {ECO:0000313|EnsemblPlants:PGSC0003DMT400025813};
SMEL_004g223450.1	46.6867	84.8633	88.35	9	RecName: Full=AT-hook motif nuclear-localized protein 29 {ECO:0000312|EMBL:AEE35850.1}; AltName: Full=Protein SUPPRESSOR OF PHYB-4#3 {ECO:0000303|PubMed:18088311};	RecName: Full=AT-hook motif nuclear-localized protein {ECO:0000256|PIRNR:PIRNR016021};
SMEL_005g223990.1	32.8667	62.8933	82.6867	9	RecName: Full=Transcription factor bHLH13; AltName: Full=Basic helix-loop-helix protein 13; Short=AtbHLH13; Short=bHLH 13; AltName: Full=Transcription factor EN 39; AltName: Full=bHLH transcription factor bHLH013;	SubName: Full=Putative transcription factor bHLH13-like {ECO:0000313|EMBL:JAP34646.1};
SMEL_005g224640.1	1.04667	4.63333	9.65667	3	RecName: Full=Cytochrome P450 CYP73A100; EC=1.14.-.-;	SubName: Full=Cinnamate 4-hydroxylase 2 {ECO:0000313|EMBL:AGJ71351.1};
SMEL_005g224740.1	64.9733	143.51	156.54	9	RecName: Full=Ethanolamine-phosphate cytidylyltransferase; EC=2.7.7.14; AltName: Full=CTP:phosphoethanolamine cytidylyltransferase; AltName: Full=Phosphorylethanolamine cytidylyltransferase 1;	SubName: Full=Putative ovule protein {ECO:0000313|EMBL:JAP31636.1};
SMEL_005g226060.1	14.3067	19.9967	26.86	3	--	SubName: Full=Uncharacterized protein {ECO:0000313|EnsemblPlants:PGSC0003DMT400056203};
SMEL_005g227440.1	143.147	165.473	286.65	3	--	SubName: Full=Uncharacterized protein {ECO:0000313|EnsemblPlants:PGSC0003DMT400070005};
SMEL_005g227530.1	0.513333	0.89	1.68667	3	RecName: Full=Probable WRKY transcription factor 48; AltName: Full=WRKY DNA-binding protein 48;	SubName: Full=Putative WRKY transcription factor 23 {ECO:0000313|EMBL:PHT48676.1};
SMEL_005g228040.1	419.02	756.457	895.553	9	RecName: Full=Pleiotropic drug resistance protein 1; AltName: Full=NtPDR1;	SubName: Full=Uncharacterized protein {ECO:0000313|EnsemblPlants:PGSC0003DMT400034124};
SMEL_005g228120.1	31.92	57.7467	157.877	3	RecName: Full=F-box/kelch-repeat protein At3g06240;	SubName: Full=Uncharacterized protein {ECO:0000313|EnsemblPlants:PGSC0003DMT400034123};
SMEL_005g228360.1	4.61667	9.51	53.6767	3	RecName: Full=Organic cation/carnitine transporter 3; Short=AtOCT3;	SubName: Full=Organic cation/carnitine transporter 3 {ECO:0000313|EMBL:PHT49024.1};
SMEL_005g228670.1	74.4933	116.85	164.133	9	RecName: Full=Scarecrow-like protein 13; Short=AtSCL13; AltName: Full=GRAS family protein 24; Short=AtGRAS-24;	SubName: Full=Scarecrow-like protein 5 {ECO:0000313|EMBL:PHU18778.1};
SMEL_005g229420.1	28.8867	64.01	72.6067	9	--	SubName: Full=Uncharacterized protein {ECO:0000313|EnsemblPlants:PGSC0003DMT400060452};
SMEL_005g230310.1	0.753333	1.70333	2.32	9	RecName: Full=Protein FLOWERING LOCUS D; EC=1.-.-.-; AltName: Full=Protein SUPPRESSOR OF OVEREXPRESSED FCA 1;	SubName: Full=Uncharacterized protein {ECO:0000313|EnsemblPlants:Solyc05g055590.1.1};
SMEL_005g231020.1	0.833333	0.483333	3.59	3	RecName: Full=Protein DOG1-like 1 {ECO:0000303|PubMed:17065317};	SubName: Full=Uncharacterized protein {ECO:0000313|EnsemblPlants:PGSC0003DMT400059950};
SMEL_005g231920.1	22.97	40.0567	70.1867	3	RecName: Full=Cysteine-rich receptor-like protein kinase 42; Short=Cysteine-rich RLK42; EC=2.7.11.-; Flags: Precursor;	SubName: Full=Uncharacterized protein {ECO:0000313|EnsemblPlants:PGSC0003DMT400055131};
SMEL_005g232620.1	413.5	768.03	779.817	9	RecName: Full=Cytochrome b561 and DOMON domain-containing protein At5g47530; AltName: Full=Protein b561A.tha10; Flags: Precursor;	SubName: Full=Putative membrane protein {ECO:0000313|EMBL:CAC37356.1};
SMEL_005g234590.1	60.4433	100.687	117.773	9	RecName: Full=Soluble inorganic pyrophosphatase PPA1 {ECO:0000303|PubMed:10092174}; EC=3.6.1.1 {ECO:0000269|PubMed:8552717}; AltName: Full=Pyrophosphate phospho-hydrolase {ECO:0000303|PubMed:8552717}; Short=PPase {ECO:0000303|PubMed:8552717};	SubName: Full=Uncharacterized protein {ECO:0000313|EnsemblPlants:Solyc12g055830.1.1};
SMEL_005g235780.1	644.613	1220.43	1482.07	9	--	SubName: Full=Uncharacterized protein {ECO:0000313|EnsemblPlants:PGSC0003DMT400045829};
SMEL_005g235910.1	48.4333	68.8133	108.51	3	RecName: Full=Purine permease 3; Short=AtPUP3;	SubName: Full=Uncharacterized protein {ECO:0000313|EnsemblPlants:Solyc12g087870.1.1};
SMEL_005g237010.1	103.113	152.707	207.373	9	RecName: Full=Mitogen-activated protein kinase kinase kinase 5 {ECO:0000303|PubMed:27679653}; EC=2.7.11.25 {ECO:0000269|PubMed:27679653}; AltName: Full=MAP3K gamma protein kinase {ECO:0000303|PubMed:10095117}; Short=AtMAP3Kgamma {ECO:0000303|PubMed:10095117};	SubName: Full=Uncharacterized protein {ECO:0000313|EnsemblPlants:PGSC0003DMT400039936};
SMEL_005g237480.1	4.42	5.82	18.5067	3	RecName: Full=Pathogenesis-related protein R major form; AltName: Full=Thaumatin-like protein E22; Flags: Precursor;	SubName: Full=Putative thaumatin-like protein {ECO:0000313|EMBL:AAU95244.1};
SMEL_005g237690.1	18.54	34.4267	36.3767	9	RecName: Full=Hydroxymethylglutaryl-CoA synthase; Short=HMG-CoA synthase; EC=2.3.3.10; AltName: Full=3-hydroxy-3-methylglutaryl coenzyme A synthase; AltName: Full=Protein EMBRYO DEFECTIVE 2778; AltName: Full=Protein FLAKY POLLEN 1;	RecName: Full=3-hydroxy-3-methylglutaryl coenzyme A synthase {ECO:0000256|RuleBase:RU364071}; Short=HMG-CoA synthase {ECO:0000256|RuleBase:RU364071}; EC=2.3.3.10 {ECO:0000256|RuleBase:RU364071};
SMEL_005g238110.1	43.7533	67.5167	97.6733	3	RecName: Full=Cellulose synthase A catalytic subunit 6 [UDP-forming]; Short=AtCesA6; EC=2.4.1.12; AltName: Full=AraxCelA; AltName: Full=Isoxaben-resistant protein 2; AltName: Full=Protein PROCUSTE 1; AltName: Full=Protein QUILL;	RecName: Full=Cellulose synthase {ECO:0000256|RuleBase:RU361116}; EC=2.4.1.12 {ECO:0000256|RuleBase:RU361116};
SMEL_005g238120.1	167.983	302.39	350.613	9	RecName: Full=4-coumarate--CoA ligase-like 5; EC=6.2.1.-; AltName: Full=4-coumarate--CoA ligase isoform 9; Short=At4CL9; AltName: Full=Peroxisomal OPC-8:0-CoA ligase 1;	SubName: Full=Uncharacterized protein {ECO:0000313|EnsemblPlants:Solyc12g094520.1.1};
SMEL_005g238770.1	32.88	52.6767	59.4433	9	RecName: Full=Clathrin interactor EPSIN 2; AltName: Full=EPSIN-related 2;	SubName: Full=clathrin interactor EPSIN 2-like isoform X2 {ECO:0000313|RefSeq:XP_016550486.1};
SMEL_005g238790.1	4.30333	12.39	13.3033	9	RecName: Full=TMV resistance protein N;	SubName: Full=TMV resistance protein N-like {ECO:0000313|RefSeq:XP_016549881.1};
SMEL_005g239730.1	0.076667	0.34	0.506667	9	RecName: Full=UPF0481 protein At3g47200;	SubName: Full=Uncharacterized protein {ECO:0000313|EnsemblPlants:PGSC0003DMT400011774};
SMEL_005g240130.1	7.25	13.43	15.4733	9	RecName: Full=Pathogenesis-related protein STH-2;	SubName: Full=Uncharacterized protein {ECO:0000313|EnsemblPlants:PGSC0003DMT400075430};
SMEL_005g240240.1	1.41667	1.03333	2.63333	3	--	SubName: Full=Uncharacterized protein {ECO:0000313|EnsemblPlants:PGSC0003DMT400075459};
SMEL_005g242080.1	1.85	1.69	3.41333	3	RecName: Full=Receptor-like protein Cf-9 homolog {ECO:0000305}; Flags: Precursor;	SubName: Full=Uncharacterized protein {ECO:0000313|EnsemblPlants:Solyc12g100030.1.1};
SMEL_006g242350.1	4.20333	5.19	10.9433	3	RecName: Full=Fumarate hydratase 2, chloroplastic; Short=Fumarase 2; EC=4.2.1.2; Flags: Precursor;	SubName: Full=Uncharacterized protein {ECO:0000313|EnsemblPlants:Solyc06g009840.2.1};
SMEL_006g243050.1	15.2867	27.3233	38.8533	9	RecName: Full=CBL-interacting serine/threonine-protein kinase 11; EC=2.7.11.1; AltName: Full=SNF1-related kinase 3.22; AltName: Full=SOS2-like protein kinase PKS5; AltName: Full=SOS3-interacting protein 4;	RecName: Full=Non-specific serine/threonine protein kinase {ECO:0000256|SAAS:SAAS00351747}; EC=2.7.11.1 {ECO:0000256|SAAS:SAAS00351747};
SMEL_006g243230.1	5.38333	22.64	27.3167	9	--	SubName: Full=Uncharacterized protein {ECO:0000313|EnsemblPlants:Solyc06g007580.1.1};
SMEL_006g243270.1	46.9633	109.49	116.03	9	--	SubName: Full=Putative ovule protein {ECO:0000313|EMBL:JAP24371.1};
SMEL_006g245220.1	59.01	151.02	239.137	9	--	SubName: Full=Uncharacterized protein {ECO:0000313|EMBL:PHU14104.1};
SMEL_006g245230.1	86.1933	193.133	300.173	9	--	SubName: Full=Putative phosphatidylinositol transfer protein 1-like {ECO:0000313|EMBL:JAP27316.1};
SMEL_006g245490.1	23.5	37.84	64.62	3	--	SubName: Full=Uncharacterized protein {ECO:0000313|EnsemblPlants:PGSC0003DMT400074984};
SMEL_006g245660.1	7.08667	8.01667	13.01	3	RecName: Full=Pentatricopeptide repeat-containing protein At5g16640, mitochondrial; Flags: Precursor;	SubName: Full=Uncharacterized protein {ECO:0000313|EMBL:PHT29022.1};
SMEL_006g245690.1	21.0733	27.5567	50.05	3	RecName: Full=Receptor-like protein kinase HERK 1; EC=2.7.11.-; AltName: Full=Protein HERCULES RECEPTOR KINASE 1; Flags: Precursor;	SubName: Full=Uncharacterized protein {ECO:0000313|EnsemblPlants:PGSC0003DMT400025093};
SMEL_006g245880.1	256.44	983.087	1007.63	9	RecName: Full=Omega-3 fatty acid desaturase, chloroplastic; EC=1.14.19.-; Flags: Precursor;	SubName: Full=Uncharacterized protein {ECO:0000313|EnsemblPlants:PGSC0003DMT400021824};
SMEL_006g248460.1	3.83333	6.79	8.17	9	--	SubName: Full=Uncharacterized protein {ECO:0000313|EnsemblPlants:PGSC0003DMT400028220};
SMEL_006g249160.1	32.8067	29.22	118.193	3	--	SubName: Full=Uncharacterized protein {ECO:0000313|EnsemblPlants:Solyc06g050870.2.1};
SMEL_006g249460.1	88.6	74.8133	175.91	3	RecName: Full=Abscisic acid receptor PYL6; AltName: Full=ABI1-binding protein 5; AltName: Full=PYR1-like protein 6; AltName: Full=Regulatory components of ABA receptor 9;	SubName: Full=Uncharacterized protein {ECO:0000313|EnsemblPlants:PGSC0003DMT400061535};
SMEL_006g249570.1	2.86667	2.17333	5.32667	3	RecName: Full=Probable methyltransferase PMT22; EC=2.1.1.-;	SubName: Full=Uncharacterized protein {ECO:0000313|EnsemblPlants:PGSC0003DMT400077225};
SMEL_006g249600.1	56.6533	77.6233	106.177	3	RecName: Full=Probable inactive receptor-like protein kinase At3g56050; Flags: Precursor;	SubName: Full=Uncharacterized protein {ECO:0000313|EnsemblPlants:PGSC0003DMT400077223};
SMEL_006g250060.1	351.933	660.32	699	9	--	SubName: Full=Uncharacterized protein {ECO:0000313|EnsemblPlants:PGSC0003DMT400028200};
SMEL_006g251010.1	21.74	36.3533	50.48	9	RecName: Full=Calcineurin B-like protein 7;	SubName: Full=calcineurin B-like protein 7 isoform X5 {ECO:0000313|RefSeq:XP_016461941.1, ECO:0000313|RefSeq:XP_016461942.1, ECO:0000313|RefSeq:XP_016461943.1};
SMEL_006g251020.1	24.2833	44.32	46.4367	9	RecName: Full=Probable pectinesterase/pectinesterase inhibitor 34; Includes: RecName: Full=Pectinesterase inhibitor 34; AltName: Full=Pectin methylesterase inhibitor 34; Includes: RecName: Full=Pectinesterase 34; Short=PE 34; EC=3.1.1.11; AltName: Full=Pectin methylesterase 34; Short=AtPME34;	RecName: Full=Pectinesterase {ECO:0000256|RuleBase:RU000589}; EC=3.1.1.11 {ECO:0000256|RuleBase:RU000589};
SMEL_006g251190.1	21.5467	56.9367	74.76	9	--	SubName: Full=Uncharacterized protein {ECO:0000313|EnsemblPlants:PGSC0003DMT400074333};
SMEL_006g251320.1	12.1	23.1333	32.79	9	RecName: Full=Uncharacterized protein At3g49140;	SubName: Full=Uncharacterized protein {ECO:0000313|EnsemblPlants:PGSC0003DMT400074342};
SMEL_006g251820.1	1.02333	2.19333	3.38	9	RecName: Full=Protein DETOXIFICATION 49 {ECO:0000303|PubMed:11739388}; Short=AtDTX49 {ECO:0000303|PubMed:11739388}; AltName: Full=Multidrug and toxic compound extrusion protein 49 {ECO:0000305}; Short=MATE protein 49 {ECO:0000305}; AltName: Full=Protein NOVEL ION CARRIER 1 {ECO:0000303|Ref.1}; Short=Protein NIC1 {ECO:0000303|Ref.1};	RecName: Full=Protein DETOXIFICATION {ECO:0000256|RuleBase:RU004914}; AltName: Full=Multidrug and toxic compound extrusion protein {ECO:0000256|RuleBase:RU004914};
SMEL_006g251970.1	32.0333	110.89	121.513	9	RecName: Full=Transcription factor bHLH120; AltName: Full=Basic helix-loop-helix protein 120; Short=AtbHLH120; Short=bHLH 120; AltName: Full=Transcription factor EN 4; AltName: Full=bHLH transcription factor bHLH120;	SubName: Full=transcription factor bHLH36-like {ECO:0000313|RefSeq:XP_016577192.1};
SMEL_006g252280.1	7.78333	13.5033	14.72	9	RecName: Full=Acid phosphatase 1; EC=3.1.3.2; AltName: Full=Apase-1(1); Flags: Precursor;	SubName: Full=VSP2 {ECO:0000313|EMBL:ANZ02993.1};
SMEL_006g252960.1	15.52	26.8333	29.8033	9	RecName: Full=Hydroxyacylglutathione hydrolase 2, mitochondrial; EC=3.1.2.6; AltName: Full=Glyoxalase II; Short=Glx II; Flags: Precursor;	SubName: Full=Putative hydroxyacylglutathione hydrolase 2, chloroplast-like {ECO:0000313|EMBL:JAP26217.1};
SMEL_006g253010.1	94.58	169.797	217.25	9	RecName: Full=Auxin-responsive protein SAUR32 {ECO:0000305}; AltName: Full=Protein ABOLISHED APICAL HOOK MAINTENANCE 1 {ECO:0000303|Ref.6}; AltName: Full=Protein SMALL AUXIN UP RNA 32 {ECO:0000303|PubMed:12036261};	SubName: Full=Uncharacterized protein {ECO:0000313|EnsemblPlants:PGSC0003DMT400077712};
SMEL_006g253810.1	2.74667	6.59333	10.7433	9	RecName: Full=RING-H2 finger protein ATL1; EC=2.3.2.27 {ECO:0000305}; AltName: Full=RING-type E3 ubiquitin transferase ATL1 {ECO:0000305};	SubName: Full=RING-H2 finger protein ATL16-like {ECO:0000313|RefSeq:XP_016577150.1};
SMEL_006g255040.1	18.41	29.7533	34.08	9	RecName: Full=Probable mannose-1-phosphate guanylyltransferase 2; EC=2.7.7.13;	SubName: Full=Uncharacterized protein {ECO:0000313|EMBL:ESW35463.1}; Flags: Fragment;
SMEL_006g255230.1	49.1967	123.67	364.867	3	RecName: Full=Alcohol dehydrogenase 3; EC=1.1.1.1 {ECO:0000250|UniProtKB:P06525};	SubName: Full=Uncharacterized protein {ECO:0000313|EnsemblPlants:PGSC0003DMT400079071};
SMEL_006g255250.1	5.27	10.9667	52.46	3	RecName: Full=Alcohol dehydrogenase 3; EC=1.1.1.1 {ECO:0000250|UniProtKB:P06525};	SubName: Full=Uncharacterized protein {ECO:0000313|EnsemblPlants:PGSC0003DMT400079071};
SMEL_006g255630.1	1.82	1.37667	5.19	3	RecName: Full=(E,E)-germacrene B synthase; EC=4.2.3.71;	SubName: Full=Sesquiterpene synthase 2 {ECO:0000313|EMBL:AAG41892.1};
SMEL_006g255940.1	28.8233	53.2567	62.0133	9	RecName: Full=Auxilin-related protein 1 {ECO:0000305}; AltName: Full=Auxilin-like protein 1 {ECO:0000303|PubMed:11701884};	SubName: Full=Uncharacterized protein {ECO:0000313|EnsemblPlants:Solyc06g060090.2.1};
SMEL_006g256650.1	131.58	163.803	268.567	3	RecName: Full=Putative glucuronosyltransferase PGSIP8; EC=2.4.1.-; AltName: Full=Glycogenin-like protein 8; AltName: Full=Plant glycogenin-like starch initiation protein 8;	SubName: Full=Uncharacterized protein {ECO:0000313|EnsemblPlants:PGSC0003DMT400030982};
SMEL_006g256680.1	3.62667	6.68	9.92333	9	RecName: Full=O-fucosyltransferase 29 {ECO:0000305}; Short=O-FucT-29 {ECO:0000305}; EC=2.4.1.- {ECO:0000305}; AltName: Full=O-fucosyltransferase family protein {ECO:0000312|EMBL:ARJ31442.1};	SubName: Full=Uncharacterized protein {ECO:0000313|EnsemblPlants:PGSC0003DMT400030987};
SMEL_006g257020.1	5.01667	13.1633	43.1467	3	RecName: Full=Protein MARD1 {ECO:0000303|PubMed:15159630}; AltName: Full=Mediator of ABA-regulated dormancy1 {ECO:0000303|PubMed:15159630}; AltName: Full=Senescence-associated protein SAG102 {ECO:0000303|PubMed:11402199};	SubName: Full=Uncharacterized protein {ECO:0000313|EnsemblPlants:PGSC0003DMT400068381};
SMEL_006g257030.1	51.4067	59.0367	95.8067	3	RecName: Full=Protein MARD1 {ECO:0000303|PubMed:15159630}; AltName: Full=Mediator of ABA-regulated dormancy1 {ECO:0000303|PubMed:15159630}; AltName: Full=Senescence-associated protein SAG102 {ECO:0000303|PubMed:11402199};	SubName: Full=Uncharacterized protein {ECO:0000313|EnsemblPlants:PGSC0003DMT400068383};
SMEL_006g257530.1	23.6167	39.8	53.64	9	RecName: Full=Phosphomevalonate kinase, peroxisomal {ECO:0000305}; EC=2.7.4.2 {ECO:0000305}; AltName: Full=5-phosphomevalonate kinase {ECO:0000303|PubMed:21655959}; Short=AtPMK {ECO:0000303|PubMed:21655959};	SubName: Full=Uncharacterized protein {ECO:0000313|EnsemblPlants:Solyc06g066310.2.1};
SMEL_006g257650.1	80.8667	266.29	352.26	9	--	SubName: Full=Uncharacterized protein {ECO:0000313|EnsemblPlants:PGSC0003DMT400052751};
SMEL_006g257980.1	6.83667	11.18	14.0433	9	RecName: Full=Ethylene-responsive transcription factor ERF003;	SubName: Full=Uncharacterized protein {ECO:0000313|EnsemblPlants:PGSC0003DMT400067218};
SMEL_006g259870.1	0.93	0.643333	2.24	3	RecName: Full=Acid phosphatase 1; EC=3.1.3.2; AltName: Full=Apase-1(1); Flags: Precursor;	SubName: Full=Uncharacterized protein {ECO:0000313|EMBL:PHT46059.1};
SMEL_006g259990.1	1.83667	3.97333	5.81	9	RecName: Full=Protein HEADING DATE 3B; AltName: Full=ELF3-like protein 1 {ECO:0000303|PubMed:22422935}; Short=OsELF3-1 {ECO:0000303|PubMed:22422935}; AltName: Full=OsELF3 {ECO:0000303|PubMed:22888152}; AltName: Full=Protein HEADING DATE 17 {ECO:0000303|PubMed:22399582};	SubName: Full=protein EARLY FLOWERING 3-like isoform X1 {ECO:0000313|RefSeq:XP_016554852.1};
SMEL_006g260790.1	34.8833	84.0033	336.853	3	RecName: Full=F-box/kelch-repeat protein At1g15670;	SubName: Full=Uncharacterized protein {ECO:0000313|EnsemblPlants:PGSC0003DMT400042652};
SMEL_006g260890.1	75.4833	115.34	249.077	3	RecName: Full=Protein CDI {ECO:0000305}; AltName: Full=Protein CADMIUM INDUCED {ECO:0000303|PubMed:22569258};	SubName: Full=Protein CDI {ECO:0000313|EMBL:PHT79425.1};
SMEL_006g261150.1	71.65	163.093	221.97	9	--	SubName: Full=uncharacterized protein LOC107874774 {ECO:0000313|RefSeq:XP_016577004.1};
SMEL_006g262120.1	0.426667	0.993333	1.14333	9	RecName: Full=Kinesin-like protein KIN-14C {ECO:0000305};	RecName: Full=Kinesin-like protein {ECO:0000256|RuleBase:RU000394};
SMEL_006g262960.1	0.3	0.196667	1.01667	3	RecName: Full=ABC transporter A family member 2; Short=ABC transporter ABCA.2; Short=AtABCA2; AltName: Full=ABC2 homolog 1;	SubName: Full=Putative ABC transporter A family member 2-like {ECO:0000313|EMBL:JAP36968.1};
SMEL_006g263600.1	1.87333	1.61667	3.56667	3	--	SubName: Full=Uncharacterized protein {ECO:0000313|EnsemblPlants:PGSC0003DMT400069670};
SMEL_006g264110.1	17.7833	38.48	44.8233	9	--	SubName: Full=Uncharacterized protein {ECO:0000313|EnsemblPlants:Solyc06g072110.2.1};
SMEL_006g264240.1	0.29	0.786667	2.41	3	RecName: Full=Miraculin; Short=MIR; Flags: Precursor;	SubName: Full=Uncharacterized protein {ECO:0000313|EnsemblPlants:PGSC0003DMT400069324};
SMEL_006g264250.1	0.096667	0.436667	1.82667	3	RecName: Full=Miraculin; Short=MIR; Flags: Precursor;	SubName: Full=miraculin-like {ECO:0000313|RefSeq:XP_016576943.1};
SMEL_006g264260.1	37.4333	64.7367	98.2833	3	RecName: Full=Kunitz trypsin inhibitor 2 {ECO:0000305}; Short=AtKTI2 {ECO:0000305}; Flags: Precursor;	SubName: Full=Uncharacterized protein {ECO:0000313|EMBL:PHT79824.1};
SMEL_006g264830.1	14.2533	29.69	31.55	9	RecName: Full=Binding partner of ACD11 1 {ECO:0000303|PubMed:18845362};	SubName: Full=Uncharacterized protein {ECO:0000313|EnsemblPlants:Solyc06g072770.2.1};
SMEL_006g266020.1	7.19	14.4267	16.1767	9	--	SubName: Full=Uncharacterized protein {ECO:0000313|EnsemblPlants:PGSC0003DMT400015190};
SMEL_006g266460.1	138.09	342.767	482.587	9	RecName: Full=Cytochrome P450 94C1 {ECO:0000305}; EC=1.14.14.49 {ECO:0000269|PubMed:22215670, ECO:0000269|PubMed:26164240}; AltName: Full=12-hydroxyjasmonoyl-L-amino acid 12-hydroxylase {ECO:0000303|PubMed:22215670};	SubName: Full=Cytochrome 94C1 {ECO:0000313|EMBL:PHT30097.1};
SMEL_006g266650.1	0.24	0.64	0.716667	9	RecName: Full=Sister chromatid cohesion 1 protein 1; AltName: Full=Protein DETERMINATE INFERTILE 1; AltName: Full=SCC1 homolog 1;	SubName: Full=Uncharacterized protein {ECO:0000313|EMBL:PHT46826.1};
SMEL_006g266700.1	49.0567	126.423	170.69	9	RecName: Full=Protein argonaute MEL1; AltName: Full=Protein MEIOSIS ARRESTED AT LEPTOTENE 1; Short=OsMEL1;	SubName: Full=Uncharacterized protein {ECO:0000313|EnsemblPlants:PGSC0003DMT400018363};
SMEL_006g266920.1	17.5667	25.1967	50.47	3	RecName: Full=ABC transporter G family member 3; Short=ABC transporter ABCG.3; Short=AtABCG3; AltName: Full=White-brown complex homolog protein 3; Short=AtWBC3;	SubName: Full=Uncharacterized protein {ECO:0000313|EnsemblPlants:PGSC0003DMT400031312};
SMEL_006g267080.1	3.39667	4.45667	9.79	3	RecName: Full=Protein ENHANCED DISEASE RESISTANCE 2;	SubName: Full=Uncharacterized protein {ECO:0000313|EnsemblPlants:PGSC0003DMT400062486};
SMEL_006g267740.1	26.5667	45.84	52.3033	9	RecName: Full=Phosphatidylinositol/phosphatidylcholine transfer protein SFH12; AltName: Full=Protein SEC FOURTEEN HOMOLOGS 12; Short=AtSFH12;	SubName: Full=Uncharacterized protein {ECO:0000313|EnsemblPlants:PGSC0003DMT400078161};
SMEL_006g267750.1	0.393333	1.15333	1.54	9	--	SubName: Full=Putative lactoylglutathione lyase family protein-like {ECO:0000313|EMBL:JAP10596.1};
SMEL_006g267810.1	188.697	296.963	341.683	9	RecName: Full=Putative E3 ubiquitin-protein ligase XBAT31; EC=2.3.2.27; AltName: Full=Ankyrin repeat domain and RING finger-containing protein XBAT31; AltName: Full=Protein XB3 homolog 1; AltName: Full=RING-type E3 ubiquitin transferase XB31;	SubName: Full=Putative E3 ubiquitin-protein ligase XBAT31 {ECO:0000313|EMBL:PHU16109.1};
SMEL_006g270290.1	8.73667	15.48	17.23	9	RecName: Full=Transcription factor MYB13 {ECO:0000305}; AltName: Full=ATMYBL1 {ECO:0000312|EMBL:CAA90748.1}; AltName: Full=Myb-related protein 13 {ECO:0000303|PubMed:11597504}; Short=AtMYB13 {ECO:0000303|PubMed:11597504};	SubName: Full=Uncharacterized protein {ECO:0000313|EnsemblPlants:PGSC0003DMT400051682};
SMEL_006g270460.1	6.21667	7.40333	13.57	3	--	SubName: Full=Uncharacterized protein {ECO:0000313|EnsemblPlants:Solyc06g084080.2.1};
SMEL_006g270800.1	11.9167	19.4167	22.76	9	--	SubName: Full=Uncharacterized protein {ECO:0000313|EnsemblPlants:PGSC0003DMT400051838};
SMEL_007g013040.1	58.5133	86.4533	134.847	3	--	SubName: Full=Uncharacterized protein {ECO:0000313|EnsemblPlants:PGSC0003DMT400041164};
SMEL_007g271300.1	16.5	25.13	34.19	9	--	SubName: Full=uncharacterized protein LOC107877608 isoform X2 {ECO:0000313|RefSeq:XP_016579784.1};
SMEL_007g272010.1	3.54	7.29	9.4	9	RecName: Full=Cytochrome P450 CYP72A219; EC=1.14.-.-; AltName: Full=Cytochrome P450 CYP72A129;	SubName: Full=Putative secologanin synthase-like {ECO:0000313|EMBL:JAP31050.1};
SMEL_007g272640.1	0.79	1.65	2.17	9	RecName: Full=Receptor kinase-like protein Xa21 {ECO:0000303|Ref.1}; EC=2.7.11.1 {ECO:0000255|PROSITE-ProRule:PRU00159, ECO:0000269|PubMed:11927577}; Contains: RecName: Full=Receptor kinase-like protein Xa21, processed {ECO:0000250|UniProtKB:Q2R2D5}; Flags: Precursor;	SubName: Full=Uncharacterized protein {ECO:0000313|EnsemblPlants:PGSC0003DMT400048264};
SMEL_007g272920.1	138.473	247.433	265.547	9	RecName: Full=Glucan endo-1,3-beta-glucosidase; EC=3.2.1.39; AltName: Full=(1->3)-beta-glucan endohydrolase; Short=(1->3)-beta-glucanase; AltName: Full=Beta-1,3-endoglucanase; Flags: Precursor;	SubName: Full=Beta-glucosidase 08 {ECO:0000313|EMBL:ACH56716.1, ECO:0000313|EnsemblPlants:Solyc07g005330.2.1};
SMEL_007g273890.1	45.9367	60.1167	89.9833	3	RecName: Full=Protein S-acyltransferase 24; EC=2.3.1.225; AltName: Full=Ankyrin repeat-containing S-palmitoyltransferase; AltName: Full=Palmitoyltransferase TIP1; AltName: Full=Protein TIP GROWTH DEFECTIVE 1; Short=AtTIP1; AltName: Full=Zinc finger DHHC domain-containing protein TIP1;	RecName: Full=S-acyltransferase {ECO:0000256|RuleBase:RU079119}; EC=2.3.1.225 {ECO:0000256|RuleBase:RU079119}; AltName: Full=Palmitoyltransferase {ECO:0000256|RuleBase:RU079119};
SMEL_007g274300.1	33.6367	84.2667	102.703	9	RecName: Full=12-oxophytodienoate reductase 3; EC=1.3.1.42; AltName: Full=12-oxophytodienoate-10,11-reductase 3; Short=OPDA-reductase 3; AltName: Full=LeOPR3;	SubName: Full=Uncharacterized protein {ECO:0000313|EMBL:KJB65275.1};
SMEL_007g276050.1	4.57	9.07667	9.49	9	RecName: Full=Cytochrome P450 72A14; EC=1.14.-.-;	SubName: Full=cytochrome P450 72A15-like {ECO:0000313|RefSeq:XP_016579403.1};
SMEL_007g277350.1	7.73	11.04	23.45	3	RecName: Full=TORTIFOLIA1-like protein 2 {ECO:0000303|PubMed:15324671};	SubName: Full=Uncharacterized protein {ECO:0000313|EnsemblPlants:PGSC0003DMT400035319};
SMEL_007g277360.1	82.36	123.497	174.137	3	RecName: Full=Probable serine/threonine-protein kinase PBL17 {ECO:0000305}; EC=2.7.11.1 {ECO:0000305}; AltName: Full=PBS1-like protein 17 {ECO:0000303|PubMed:20413097};	SubName: Full=Putative serine/threonine-protein kinase-like {ECO:0000313|EMBL:JAP31424.1};
SMEL_007g277690.1	10.6833	15.5467	42.7967	3	RecName: Full=Auxin-responsive protein SAUR50 {ECO:0000303|PubMed:12036261}; AltName: Full=Protein SMALL AUXIN UP RNA 50 {ECO:0000303|PubMed:12036261};	SubName: Full=Uncharacterized protein {ECO:0000313|EnsemblPlants:PGSC0003DMT400035267};
SMEL_007g278460.1	19.1133	29.4533	37.6667	9	RecName: Full=O-fucosyltransferase 35 {ECO:0000305}; Short=O-FucT-35 {ECO:0000305}; EC=2.4.1.- {ECO:0000305}; AltName: Full=O-fucosyltransferase family protein {ECO:0000312|EMBL:ARJ31451.1};	SubName: Full=Putative ovule protein {ECO:0000313|EMBL:JAP34932.1};
SMEL_007g278470.1	27.4267	40.1067	50.54	9	RecName: Full=O-fucosyltransferase 35 {ECO:0000305}; Short=O-FucT-35 {ECO:0000305}; EC=2.4.1.- {ECO:0000305}; AltName: Full=O-fucosyltransferase family protein {ECO:0000312|EMBL:ARJ31451.1};	SubName: Full=Uncharacterized protein {ECO:0000313|EnsemblPlants:Solyc07g041750.2.1};
SMEL_007g279890.1	5.84667	6.74	12.0467	3	RecName: Full=Galacturonokinase; EC=2.7.1.44; AltName: Full=D-galacturonic acid-1-P kinase;	SubName: Full=Galacturonokinase {ECO:0000313|EMBL:PHT42526.1};
SMEL_007g280160.1	0.206667	0.713333	0.76	9	RecName: Full=Cytochrome b561 and DOMON domain-containing protein At5g35735; AltName: Full=Protein b561A.tha16; Flags: Precursor;	SubName: Full=Uncharacterized protein {ECO:0000313|EnsemblPlants:PGSC0003DMT400021958};
SMEL_007g280380.1	12.87	23.5833	37.64	3	RecName: Full=Cytochrome P450 81E8 {ECO:0000303|PubMed:14617078}; EC=1.14.13.- {ECO:0000305};	SubName: Full=Uncharacterized protein {ECO:0000313|EnsemblPlants:PGSC0003DMT400077055};
SMEL_007g281000.1	0.91	3.16667	15.8867	3	RecName: Full=Rop guanine nucleotide exchange factor 12 {ECO:0000303|PubMed:15980860}; Short=AtRopGEF12 {ECO:0000303|PubMed:15980860}; AltName: Full=Protein MATERNAL EFFECT EMBRYO ARREST 64; AltName: Full=Rho of plants guanine nucleotide exchange factor 12 {ECO:0000303|PubMed:15980860};	SubName: Full=Uncharacterized protein {ECO:0000313|EnsemblPlants:Solyc07g032730.2.1};
SMEL_007g282940.1	65.9933	106.547	119.31	9	RecName: Full=Casein kinase 1-like protein 1 {ECO:0000305}; EC=2.7.11.1 {ECO:0000305}; AltName: Full=Casein kinase 1 {ECO:0000303|PubMed:7923358}; AltName: Full=Casein kinase I isoform delta-like {ECO:0000305}; Short=CKI-delta {ECO:0000305}; AltName: Full=Protein CASEIN KINASE I-LIKE 1 {ECO:0000303|PubMed:16126836};	SubName: Full=Uncharacterized protein {ECO:0000313|EnsemblPlants:PGSC0003DMT400082747};
SMEL_007g283370.1	14.7733	22.0967	40.3533	3	RecName: Full=Putative E3 ubiquitin-protein ligase LIN-1 {ECO:0000250|UniProtKB:D1FP53}; EC=2.3.2.27 {ECO:0000303|PubMed:19508425}; AltName: Full=Protein cerberus {ECO:0000303|PubMed:19508425}; AltName: Full=RING-type E3 ubiquitin transferase LIN-1 {ECO:0000305};	RecName: Full=RING-type E3 ubiquitin transferase {ECO:0000256|SAAS:SAAS00702733}; EC=2.3.2.27 {ECO:0000256|SAAS:SAAS00702733};
SMEL_007g283770.1	9.03333	15.8133	18.1	9	RecName: Full=1-aminocyclopropane-1-carboxylate oxidase 1; Short=ACC oxidase 1; Short=AtACO1; EC=1.14.17.4;	SubName: Full=Uncharacterized protein {ECO:0000313|EnsemblPlants:PGSC0003DMT400005971};
SMEL_007g284630.1	65.2133	100.087	170.793	3	RecName: Full=Probable chlorophyll(ide) b reductase NYC1, chloroplastic; EC=1.1.1.294; AltName: Full=Protein NON-YELLOW COLORING 1; Short=OsNYC1; Flags: Precursor;	SubName: Full=probable chlorophyll(Ide) b reductase NYC1, chloroplastic {ECO:0000313|RefSeq:XP_016500847.1};
SMEL_007g284730.1	97.81	150.71	304.913	3	--	SubName: Full=Uncharacterized protein {ECO:0000313|EnsemblPlants:PGSC0003DMT400030456};
SMEL_007g285870.1	3.51333	8.06	10.9567	9	RecName: Full=Transcription factor JUNGBRUNNEN 1; AltName: Full=NAC domain-containing protein 42; Short=ANAC042;	SubName: Full=Uncharacterized protein {ECO:0000313|EnsemblPlants:Solyc07g045030.2.1};
SMEL_007g286300.1	30.82	45.8367	57.3033	9	RecName: Full=Probable E3 ubiquitin-protein ligase XERICO; EC=2.3.2.27; AltName: Full=RING-type E3 ubiquitin transferase XERICO;	SubName: Full=probable E3 ubiquitin-protein ligase XERICO {ECO:0000313|RefSeq:XP_016580442.1, ECO:0000313|RefSeq:XP_016580443.1};
SMEL_007g287820.1	0.52	0.5	3.21	3	RecName: Full=1-aminocyclopropane-1-carboxylate oxidase 1; Short=ACC oxidase 1; EC=1.14.17.4; AltName: Full=Ethylene-forming enzyme; Short=EFE; AltName: Full=Protein pTOM 13;	SubName: Full=1-aminocyclopropane-1-carboxylic acid oxidase {ECO:0000313|EMBL:ADO32577.1};
SMEL_007g287850.1	27.8333	56.8933	66.1133	9	RecName: Full=Tyrosine-protein phosphatase DSP1 {ECO:0000305}; EC=3.1.3.48 {ECO:0000255|PROSITE-ProRule:PRU10044, ECO:0000269|PubMed:18433060, ECO:0000269|PubMed:21409566}; AltName: Full=Protein PLANT AND FUNGI ATYPICAL DUAL-SPECIFICITY PHOSPHATASE 1 {ECO:0000303|PubMed:21409566}; Short=AtPFA-DSP1 {ECO:0000303|PubMed:21409566}; AltName: Full=Tyrosine-protein phosphatase At1g05000 {ECO:0000305};	SubName: Full=Uncharacterized protein {ECO:0000313|EnsemblPlants:PGSC0003DMT400016458};
SMEL_007g288200.1	0.566667	1.32	1.53667	9	RecName: Full=Mitogen-activated protein kinase kinase kinase 18 {ECO:0000303|PubMed:26443375}; EC=2.7.11.25 {ECO:0000255|PROSITE-ProRule:PRU00159, ECO:0000269|PubMed:25680457, ECO:0000269|PubMed:26443375};	SubName: Full=Uncharacterized protein {ECO:0000313|EnsemblPlants:PGSC0003DMT400038861};
SMEL_007g289140.1	1.56333	1.29	2.77	3	RecName: Full=G-type lectin S-receptor-like serine/threonine-protein kinase At4g03230; EC=2.7.11.1; Flags: Precursor;	SubName: Full=uncharacterized protein LOC107876757 {ECO:0000313|RefSeq:XP_016579099.1};
SMEL_007g289230.1	54.7833	96.4633	132.933	9	RecName: Full=Mitogen-activated protein kinase kinase kinase 1; Short=ARAKIN; Short=AtMEKK1; Short=MAP kinase kinase kinase 1; EC=2.7.11.25 {ECO:0000269|PubMed:23857079};	SubName: Full=Uncharacterized protein {ECO:0000313|EnsemblPlants:Solyc07g053170.2.1};
SMEL_007g289420.1	62.58	149.573	176.223	9	RecName: Full=Diacylglycerol kinase 5; Short=AtDGK5; Short=DAG kinase 5; EC=2.7.1.107; AltName: Full=Diglyceride kinase 5; Short=DGK 5;	RecName: Full=Diacylglycerol kinase {ECO:0000256|RuleBase:RU361128}; Short=DAG kinase {ECO:0000256|RuleBase:RU361128}; EC=2.7.1.107 {ECO:0000256|RuleBase:RU361128};
SMEL_007g289440.1	31.1367	45.47	90.7733	3	--	SubName: Full=Uncharacterized protein {ECO:0000313|EnsemblPlants:PGSC0003DMT400047344};
SMEL_007g289450.1	1.54333	2.12333	5.58333	3	--	SubName: Full=Uncharacterized protein {ECO:0000313|EnsemblPlants:PGSC0003DMT400047317};
SMEL_007g289460.1	92.8933	78.2433	212.18	3	--	SubName: Full=Uncharacterized protein {ECO:0000313|EMBL:PHT43299.1};
SMEL_007g289470.1	129.227	120.077	320.06	3	--	SubName: Full=Uncharacterized protein {ECO:0000313|EnsemblPlants:PGSC0003DMT400047317};
SMEL_007g289520.1	3.94667	4.70667	16.4833	3	--	SubName: Full=Uncharacterized protein {ECO:0000313|EnsemblPlants:PGSC0003DMT400047338};
SMEL_007g290040.1	6.88667	13.3767	14.59	9	RecName: Full=Ethylene-responsive transcription factor ERF053 {ECO:0000305}; Short=AtERF53 {ECO:0000303|PubMed:22095047};	SubName: Full=Ethylene-responsive transcription factor {ECO:0000313|EMBL:PHU12326.1};
SMEL_007g290370.1	40.3833	66.1067	74.42	9	RecName: Full=Probable serine/threonine-protein kinase At1g09600; EC=2.7.11.-;	SubName: Full=Putative serine/threonine-protein kinase-like {ECO:0000313|EMBL:JAP36613.1};
SMEL_007g291050.1	0.753333	0.51	1.66	3	RecName: Full=Bifunctional riboflavin kinase/FMN phosphatase; Includes: RecName: Full=FMN phosphatase {ECO:0000303|PubMed:16183635}; EC=3.1.3.102 {ECO:0000269|PubMed:16183635, ECO:0000269|PubMed:22002057}; AltName: Full=FMN phosphohydrolase {ECO:0000303|PubMed:16183635}; Includes: RecName: Full=Riboflavin kinase {ECO:0000303|PubMed:16183635}; EC=2.7.1.26 {ECO:0000269|PubMed:16183635, ECO:0000269|…	SubName: Full=Uncharacterized protein {ECO:0000313|EnsemblPlants:Solyc07g053270.2.1};
SMEL_007g291360.1	79.2833	120.303	157.627	9	--	SubName: Full=Uncharacterized protein {ECO:0000313|EnsemblPlants:PGSC0003DMT400052590};
SMEL_007g291370.1	21.34	35.7567	40.5367	9	RecName: Full=Probable WRKY transcription factor 69; AltName: Full=WRKY DNA-binding protein 69;	SubName: Full=Putative WRKY transcription factor 69-like {ECO:0000313|EMBL:JAP21728.1}; Flags: Fragment;
SMEL_007g291380.1	2.83333	2.65667	7.48	3	RecName: Full=Ras-related protein YPT3;	SubName: Full=Ras-related protein YPT3 {ECO:0000313|EMBL:PHT43545.1};
SMEL_007g291530.1	1.81667	1.37333	3.56333	3	RecName: Full=G-type lectin S-receptor-like serine/threonine-protein kinase SD2-5; EC=2.7.11.1; AltName: Full=S-domain-2 (SD2) receptor kinase 5; Short=SD2-5; Flags: Precursor;	SubName: Full=Uncharacterized protein {ECO:0000313|EnsemblPlants:PGSC0003DMT400044528};
SMEL_007g291800.1	3.12667	6.56333	21.5667	3	RecName: Full=G-type lectin S-receptor-like serine/threonine-protein kinase At5g35370; EC=2.7.11.1; Flags: Precursor;	SubName: Full=Uncharacterized protein {ECO:0000313|EnsemblPlants:PGSC0003DMT400044674};
SMEL_007g292880.1	577.57	901.41	1164.35	9	RecName: Full=Chitin-inducible gibberellin-responsive protein 1;	SubName: Full=GRAS2 {ECO:0000313|EMBL:ABD72959.1, ECO:0000313|EnsemblPlants:Solyc07g063940.1.1};
SMEL_007g293180.1	135.273	161.307	573.02	3	--	SubName: Full=Uncharacterized protein {ECO:0000313|EnsemblPlants:PGSC0003DMT400049546};
SMEL_007g293340.1	14.65	19.85	26.65	3	RecName: Full=Receptor-like protein kinase THESEUS 1; EC=2.7.11.-; Flags: Precursor;	SubName: Full=Receptor-like protein kinase THESEUS 1 {ECO:0000313|EMBL:PHT77148.1};
SMEL_007g293410.1	19.59	43.73	56.3633	9	RecName: Full=NAC domain-containing protein 72; Short=ANAC072; AltName: Full=Protein RESPONSIVE TO DESICCATION 26;	SubName: Full=Uncharacterized protein {ECO:0000313|EnsemblPlants:Solyc07g063410.2.1};
SMEL_007g294690.1	194.283	350.763	385.07	9	RecName: Full=Trifunctional UDP-glucose 4,6-dehydratase/UDP-4-keto-6-deoxy-D-glucose 3,5-epimerase/UDP-4-keto-L-rhamnose-reductase RHM1 {ECO:0000305|PubMed:17190829}; AltName: Full=Protein REPRESSOR OF LRX1 1 {ECO:0000303|PubMed:18567791}; AltName: Full=Rhamnose biosynthetic enzyme 1; Short=AtRHM1; Includes: RecName: Full=UDP-glucose 4,6-dehydratase {ECO:0000305|PubMed:17190829}; EC=4.2.1.76 {ECO…	SubName: Full=Putative rhamnose biosynthetic enzyme 1-like {ECO:0000313|EMBL:JAP35006.1};
SMEL_007g294740.1	70.9133	130.033	132.3	9	RecName: Full=Mitogen-activated protein kinase 19; Short=AtMPK19; Short=MAP kinase 19; EC=2.7.11.24;	RecName: Full=Mitogen-activated protein kinase {ECO:0000256|SAAS:SAAS00652812}; EC=2.7.11.24 {ECO:0000256|SAAS:SAAS00652812};
SMEL_007g295020.1	47.6767	95.3267	105.72	9	--	SubName: Full=Putative ovule protein {ECO:0000313|EMBL:JAP31437.1};
SMEL_007g295290.1	82.9967	123.01	164.283	9	RecName: Full=Calcium-dependent protein kinase 2; Short=CDPK 2; EC=2.7.11.1;	SubName: Full=Uncharacterized protein {ECO:0000313|EnsemblPlants:Solyc07g064610.2.1};
SMEL_007g295370.1	97.17	139.433	215.17	3	RecName: Full=Heterodimeric geranylgeranyl pyrophosphate synthase small subunit, chloroplastic; Flags: Precursor;	SubName: Full=Uncharacterized protein {ECO:0000313|EnsemblPlants:Solyc07g064660.1.1};
SMEL_007g295460.1	20.9333	33.12	38.26	9	RecName: Full=Threonine--tRNA ligase, mitochondrial 1 {ECO:0000305}; EC=6.1.1.3 {ECO:0000305}; AltName: Full=AtSYT1 {ECO:0000303|PubMed:10583378}; AltName: Full=Threonyl-tRNA synthetase {ECO:0000305}; Short=ThrRS {ECO:0000305}; Flags: Precursor;	SubName: Full=Uncharacterized protein {ECO:0000313|EnsemblPlants:PGSC0003DMT400057460};
SMEL_007g295500.1	61.68	126.25	168.577	9	RecName: Full=Mitogen-activated protein kinase kinase kinase 17 {ECO:0000303|PubMed:25720833}; EC=2.7.11.25 {ECO:0000250|UniProtKB:Q9ZVP5, ECO:0000255|PROSITE-ProRule:PRU00159};	SubName: Full=Uncharacterized protein {ECO:0000313|EnsemblPlants:PGSC0003DMT400057171};
SMEL_007g295760.1	11.7333	11.0667	21.49	3	RecName: Full=Long-chain-alcohol O-fatty-acyltransferase; EC=2.3.1.75; AltName: Full=Wax synthase;	SubName: Full=Uncharacterized protein {ECO:0000313|EnsemblPlants:PGSC0003DMT400057145};
SMEL_007g295810.1	72.8733	137.1	158.893	9	RecName: Full=Glycerophosphodiester phosphodiesterase GDPDL4 {ECO:0000305}; EC=3.1.4.46 {ECO:0000250|UniProtKB:Q7Y208}; AltName: Full=Glycerophosphodiester phosphodiesterase-like 4 {ECO:0000303|PubMed:21323773}; Short=ATGDPDL4 {ECO:0000303|PubMed:21323773}; AltName: Full=Glycerophosphodiesterase-like 1 {ECO:0000303|PubMed:18718934}; AltName: Full=Protein SHV3-LIKE 1 {ECO:0000303|PubMed:18718934};…	SubName: Full=Putative glycerophosphoryl diester phosphodiesterase 1-like {ECO:0000313|EMBL:JAP35698.1};
SMEL_007g296600.1	59.1767	81.34	108.4	3	RecName: Full=Chaperone protein dnaJ 11, chloroplastic; Short=AtDjC11; Short=AtJ11; Flags: Precursor;	SubName: Full=Uncharacterized protein {ECO:0000313|EnsemblPlants:PGSC0003DMT400056986};
SMEL_007g296610.1	46.19	48.8533	88.0667	3	RecName: Full=Chaperone protein dnaJ 11, chloroplastic; Short=AtDjC11; Short=AtJ11; Flags: Precursor;	SubName: Full=Uncharacterized protein {ECO:0000313|EnsemblPlants:Solyc07g065970.1.1};
SMEL_008g297590.1	8.13333	45.04	55.25	9	RecName: Full=Ethylene-responsive transcription factor ERF025;	SubName: Full=Uncharacterized protein {ECO:0000313|EMBL:PHT39597.1};
SMEL_008g298280.1	71.8867	107.767	135.333	9	RecName: Full=Calcineurin B-like protein 1; AltName: Full=SOS3-like calcium-binding protein 5;	SubName: Full=Uncharacterized protein {ECO:0000313|EnsemblPlants:PGSC0003DMT400052803};
SMEL_008g298650.1	2.71667	8.37333	9.30333	9	RecName: Full=NADP-dependent malic enzyme; Short=NADP-ME; EC=1.1.1.40;	RecName: Full=Malic enzyme {ECO:0000256|RuleBase:RU003426};
SMEL_008g300710.1	1.65	2.55333	3.47667	9	RecName: Full=UDP-glycosyltransferase 74D1; EC=2.4.1.-; AltName: Full=Jasmonate glucosyltransferase 1; Short=AtJGT1;	RecName: Full=Glycosyltransferase {ECO:0000256|RuleBase:RU362057}; EC=2.4.1.- {ECO:0000256|RuleBase:RU362057};
SMEL_008g300920.1	1.58667	3.08	5.48	3	RecName: Full=Cytoplasmic 60S subunit biogenesis factor REI1 homolog 1 {ECO:0000305}; AltName: Full=Protein REI1-LIKE 1 {ECO:0000303|PubMed:24038679}; AltName: Full=pre-60S factor REI1 homolog 1 {ECO:0000305};	SubName: Full=Uncharacterized protein {ECO:0000313|EnsemblPlants:PGSC0003DMT400067667};
SMEL_008g301170.1	23.2167	42.1233	60.7067	9	--	SubName: Full=Uncharacterized protein {ECO:0000313|EnsemblPlants:PGSC0003DMT400067642};
SMEL_008g301800.1	0.796667	1.58667	2.06667	9	--	SubName: Full=Putative ovule protein {ECO:0000313|EMBL:JAP37819.1};
SMEL_008g303420.1	1.77333	3.94333	4.04667	9	RecName: Full=EG45-like domain containing protein; AltName: Full=Blight-associated protein p12; AltName: Full=Plant natriuretic peptide; Short=PNP; Flags: Precursor;	SubName: Full=EG45-like domain containing protein isoform X1 {ECO:0000313|RefSeq:XP_009797599.1};
SMEL_008g304080.1	82.5067	202.117	212.423	9	--	SubName: Full=Uncharacterized protein {ECO:0000313|EnsemblPlants:PGSC0003DMT400082714};
SMEL_008g305680.1	11.1833	15.4933	23.3967	3	RecName: Full=Mitochondrial carrier protein CoAc1 {ECO:0000305}; AltName: Full=AtCoAc1 {ECO:0000303|PubMed:23590975}; AltName: Full=Mitochondrial coenzyme A transporter CoAc1 {ECO:0000305};	SubName: Full=mitochondrial substrate carrier family protein P-like {ECO:0000313|RefSeq:XP_016513041.1};
SMEL_008g307140.1	0.786667	1.87	5.48333	3	RecName: Full=ATP-dependent 6-phosphofructokinase 3 {ECO:0000255|HAMAP-Rule:MF_03186}; Short=ATP-PFK 3 {ECO:0000255|HAMAP-Rule:MF_03186}; Short=Phosphofructokinase 3 {ECO:0000255|HAMAP-Rule:MF_03186}; EC=2.7.1.11 {ECO:0000255|HAMAP-Rule:MF_03186}; AltName: Full=Phosphohexokinase 3 {ECO:0000255|HAMAP-Rule:MF_03186};	RecName: Full=ATP-dependent 6-phosphofructokinase {ECO:0000256|HAMAP-Rule:MF_03186}; Short=ATP-PFK {ECO:0000256|HAMAP-Rule:MF_03186}; Short=Phosphofructokinase {ECO:0000256|HAMAP-Rule:MF_03186}; EC=2.7.1.11 {ECO:0000256|HAMAP-Rule:MF_03186}; AltName: Full=Phosphohexokinase {ECO:0000256|HAMAP-Rule:MF_03186};
SMEL_008g307560.1	32.3033	48.45	58.65	9	RecName: Full=Ferrochelatase-2, chloroplastic; EC=4.99.1.1; AltName: Full=Ferrochelatase II; AltName: Full=Heme synthase 2; AltName: Full=Protoheme ferro-lyase 2; Flags: Precursor;	RecName: Full=Ferrochelatase {ECO:0000256|RuleBase:RU000607}; EC=4.99.1.1 {ECO:0000256|RuleBase:RU000607};
SMEL_008g308200.1	148.843	260.813	345.323	9	RecName: Full=Protein TIFY 5A {ECO:0000303|PubMed:17499004}; AltName: Full=Jasmonate ZIM domain-containing protein 8 {ECO:0000303|PubMed:17637675};	SubName: Full=Uncharacterized protein {ECO:0000313|EnsemblPlants:PGSC0003DMT400022650};
SMEL_008g308210.1	372.363	819.78	914.883	9	RecName: Full=Protein TIFY 5A {ECO:0000303|PubMed:17499004}; AltName: Full=Jasmonate ZIM domain-containing protein 8 {ECO:0000303|PubMed:17637675};	SubName: Full=Uncharacterized protein {ECO:0000313|EnsemblPlants:PGSC0003DMT400022650};
SMEL_008g309870.1	5.34333	4.28333	13.0867	3	RecName: Full=Probable ethanolamine kinase; EC=2.7.1.82; AltName: Full=Protein EMBRYO DEFECTIVE 1187;	SubName: Full=Putative ovule protein {ECO:0000313|EMBL:JAP19600.1};
SMEL_008g309970.1	155.733	236.98	292.743	9	RecName: Full=Bark storage protein A; Flags: Precursor;	SubName: Full=Uncharacterized protein {ECO:0000313|EnsemblPlants:PGSC0003DMT400074804};
SMEL_008g310920.1	1.70667	1.39	3.98667	3	RecName: Full=Probable WRKY transcription factor 40; AltName: Full=WRKY DNA-binding protein 40;	SubName: Full=WRKY transcription factor 18-like {ECO:0000313|RefSeq:XP_016582147.1};
SMEL_008g311480.1	7.5	15.5433	16.82	9	RecName: Full=Probable plastid-lipid-associated protein 10, chloroplastic; AltName: Full=Fibrillin-8; Flags: Precursor;	SubName: Full=Putative plastid-lipid-associated protein 10, chloroplastic-like {ECO:0000313|EMBL:JAP20651.1};
SMEL_008g314170.1	39.9833	67.1267	77.1267	9	RecName: Full=Secretory carrier-associated membrane protein 4; Short=Secretory carrier membrane protein 4;	RecName: Full=Secretory carrier-associated membrane protein {ECO:0000256|RuleBase:RU363122}; Short=Secretory carrier membrane protein {ECO:0000256|RuleBase:RU363122};
SMEL_008g314270.1	16.96	31.32	41.4067	9	RecName: Full=CSC1-like protein At1g32090;	SubName: Full=Uncharacterized protein {ECO:0000313|EnsemblPlants:PGSC0003DMT400024013};
SMEL_008g314370.1	76.8067	173.147	175.553	9	RecName: Full=Lysine-specific demethylase JMJ706; EC=1.14.11.-; AltName: Full=Jumonji domain-containing protein 706; AltName: Full=Lysine-specific histone demethylase JMJ706; AltName: Full=Protein JUMONJI 706;	SubName: Full=Lysine-specific demethylase {ECO:0000313|EMBL:PHT93049.1};
SMEL_008g314620.1	1.11	2.12333	3.86667	3	RecName: Full=Basic 7S globulin; AltName: Full=SBg7S; Short=Bg; Contains: RecName: Full=Basic 7S globulin high kDa subunit; Contains: RecName: Full=Basic 7S globulin low kDa subunit; Flags: Precursor;	SubName: Full=Uncharacterized protein {ECO:0000313|EnsemblPlants:Solyc08g076620.1.1};
SMEL_008g315050.1	3.24333	1.45667	7.99	3	RecName: Full=Soyasapogenol B glucuronide galactosyltransferase; EC=2.4.1.272; AltName: Full=Soyasaponin glycosyltransferase 2; AltName: Full=UDP-galactose:SBMG-galactosyltransferase;	RecName: Full=Glycosyltransferase {ECO:0000256|RuleBase:RU362057}; EC=2.4.1.- {ECO:0000256|RuleBase:RU362057};
SMEL_008g315100.1	4.57333	7.70333	11.94	3	RecName: Full=NAC domain-containing protein 71 {ECO:0000303|PubMed:15029955}; Short=ANAC071 {ECO:0000303|PubMed:15029955};	SubName: Full=Uncharacterized protein {ECO:0000313|EnsemblPlants:Solyc08g077110.2.1};
SMEL_008g315660.1	92.32	150.57	185.453	9	--	SubName: Full=uncharacterized protein LOC107868293 {ECO:0000313|RefSeq:XP_016570439.1};
SMEL_008g315970.1	38.74	78.7533	82.5333	9	RecName: Full=Protein NETWORKED 4A {ECO:0000303|PubMed:22840520};	SubName: Full=Uncharacterized protein {ECO:0000313|EnsemblPlants:PGSC0003DMT400004626};
SMEL_008g316890.1	4.28667	7.82	21.9267	3	RecName: Full=L-lactate dehydrogenase B; Short=LDH-B; EC=1.1.1.27; Flags: Fragment;	RecName: Full=L-lactate dehydrogenase {ECO:0000256|RuleBase:RU000496}; EC=1.1.1.27 {ECO:0000256|RuleBase:RU000496};
SMEL_008g317140.1	53.66	92.0833	138.793	3	RecName: Full=Monocopper oxidase-like protein SKU5; AltName: Full=Skewed roots; Flags: Precursor;	SubName: Full=Uncharacterized protein {ECO:0000313|EnsemblPlants:PGSC0003DMT400012216};
SMEL_008g318320.1	245.043	554.597	740.48	9	RecName: Full=Ethylene-responsive transcription factor ERF026;	SubName: Full=Uncharacterized protein {ECO:0000313|EnsemblPlants:PGSC0003DMT400058587};
SMEL_008g318380.1	6.70667	18.3	34.01	3	RecName: Full=F-box protein PP2-A13; AltName: Full=Protein PHLOEM PROTEIN 2-LIKE A13; Short=AtPP2-A13; AltName: Full=SKP1-interacting partner 9;	SubName: Full=Uncharacterized protein {ECO:0000313|EnsemblPlants:Solyc08g080360.2.1};
SMEL_008g318480.1	6.37667	8.61	13.7533	3	RecName: Full=Cytochrome P450 87A3; EC=1.14.-.-;	SubName: Full=cytochrome P450 87A3 {ECO:0000313|RefSeq:XP_016567550.1};
SMEL_008g318550.1	135.613	244.387	264.607	9	RecName: Full=RHOMBOID-like protein 3 {ECO:0000303|PubMed:16223493, ECO:0000303|PubMed:17181860}; Short=AtRBL3 {ECO:0000303|PubMed:16223493, ECO:0000303|PubMed:17181860}; EC=3.4.21.- {ECO:0000305};	RecName: Full=Rhomboid-like protein {ECO:0000256|RuleBase:RU362115}; EC=3.4.21.- {ECO:0000256|RuleBase:RU362115};
SMEL_008g318560.1	161.95	284.787	298.24	9	RecName: Full=RHOMBOID-like protein 2 {ECO:0000303|PubMed:16223493, ECO:0000303|PubMed:17181860}; Short=AtRBL2 {ECO:0000303|PubMed:16223493, ECO:0000303|PubMed:17181860}; EC=3.4.21.105 {ECO:0000269|PubMed:16223493};	RecName: Full=Rhomboid-like protein {ECO:0000256|RuleBase:RU362115}; EC=3.4.21.- {ECO:0000256|RuleBase:RU362115};
SMEL_009g321610.1	17.0933	18.07	54.48	3	RecName: Full=Protein DMR6-LIKE OXYGENASE 2 {ECO:0000303|PubMed:25376907}; EC=1.14.11.- {ECO:0000255|PROSITE-ProRule:PRU00805}; AltName: Full=2-oxoglutarate (2OG)-Fe(II) oxygenase-like protein DLO2 {ECO:0000303|PubMed:25376907}; AltName: Full=Salicylate 3-hydroxylase DLO2 {ECO:0000305}; Short=S3H DLO2 {ECO:0000305}; Short=SA 3-hydroxylase DLO2 {ECO:0000305}; Short=Salicylic acid 3-hydroxylase DLO…	SubName: Full=Uncharacterized protein {ECO:0000313|EnsemblPlants:PGSC0003DMT400009900};
SMEL_009g321850.1	0.79	1.08	2.09667	3	RecName: Full=Putative white-brown complex homolog protein 30; AltName: Full=Putative non-intrinsic ABC protein 12; AltName: Full=WBC-related protein 1;	SubName: Full=Uncharacterized protein {ECO:0000313|EnsemblPlants:Solyc09g008000.2.1};
SMEL_009g321860.1	72.4433	86.3533	157.237	3	RecName: Full=Serine/threonine-protein kinase PCRK1 {ECO:0000305}; EC=2.7.11.1 {ECO:0000269|PubMed:25711411}; AltName: Full=Protein PTI-COMPROMISED RECEPTOR-LIKE CYTOPLASMIC KINASE 1 {ECO:0000303|PubMed:25711411};	SubName: Full=Uncharacterized protein {ECO:0000313|EnsemblPlants:Solyc09g008010.2.1};
SMEL_009g323400.1	10.3833	15.3067	24.0233	3	RecName: Full=Probable protein phosphatase 2C 23; Short=AtPP2C23; EC=3.1.3.16; AltName: Full=Protein POLTERGEIST-LIKE 4; AltName: Full=Protein phosphatase 2C PLL4; Short=PP2C PLL4;	SubName: Full=Uncharacterized protein {ECO:0000313|EnsemblPlants:PGSC0003DMT400022788};
SMEL_009g324070.1	23.56	24.1333	50.8533	3	RecName: Full=Putative receptor protein kinase ZmPK1; EC=2.7.11.1; Flags: Precursor;	SubName: Full=Uncharacterized protein {ECO:0000313|EMBL:PHU06975.1};
SMEL_009g324240.1	15.86	38.1933	45.22	9	RecName: Full=Probable glutathione S-transferase; EC=2.5.1.18; AltName: Full=Auxin-induced protein PCNT103;	SubName: Full=Putative glutathione S-transferase {ECO:0000313|EMBL:PHT38355.1};
SMEL_009g324730.1	4.9	8.08333	9.73333	9	--	SubName: Full=Uncharacterized protein {ECO:0000313|EnsemblPlants:PGSC0003DMT400052457};
SMEL_009g324740.1	96.5	185.393	218.717	9	--	SubName: Full=Uncharacterized protein {ECO:0000313|EnsemblPlants:Solyc09g011880.2.1};
SMEL_009g324760.1	45.4633	83.62	94.8267	9	RecName: Full=O-fucosyltransferase 19 {ECO:0000305}; Short=O-FucT-19 {ECO:0000305}; EC=2.4.1.- {ECO:0000305}; AltName: Full=O-fucosyltransferase family protein {ECO:0000305};	SubName: Full=Uncharacterized protein {ECO:0000313|EnsemblPlants:PGSC0003DMT400052382};
SMEL_009g325420.1	11.9733	39.36	40.7533	9	RecName: Full=Trihelix transcription factor GT-3a; AltName: Full=Trihelix DNA-binding protein GT-3a;	SubName: Full=trihelix transcription factor GT-3b-like {ECO:0000313|RefSeq:XP_016448116.1};
SMEL_009g325470.1	28.64	52.6033	60.4133	9	--	SubName: Full=Uncharacterized protein {ECO:0000313|EnsemblPlants:PGSC0003DMT400077746};
SMEL_009g325990.1	36.13	28.82	58	3	RecName: Full=Bifunctional TH2 protein, mitochondrial {ECO:0000303|PubMed:27677881}; AltName: Full=THIAMINE REQUIRING 2 {ECO:0000303|PubMed:27677881}; Includes: RecName: Full=Thiamine phosphate phosphatase {ECO:0000303|PubMed:27677881}; EC=3.1.3.100 {ECO:0000269|PubMed:27677881}; Includes: RecName: Full=Aminopyrimidine aminohydrolase {ECO:0000303|PubMed:25014715}; EC=3.5.99.2 {ECO:0000269|PubMed:…	SubName: Full=Putative aminopyrimidine aminohydrolase, mitochondrial {ECO:0000313|EMBL:PHU07392.1};
SMEL_009g327770.1	16.3667	25.2233	31.38	9	RecName: Full=E3 ubiquitin protein ligase DRIP2; EC=2.3.2.27 {ECO:0000269|PubMed:18552202}; AltName: Full=DREB2A-interacting protein 2; AltName: Full=RING-type E3 ubiquitin transferase DRIP2 {ECO:0000305};	SubName: Full=Uncharacterized protein {ECO:0000313|EnsemblPlants:PGSC0003DMT400038984};
SMEL_009g328290.1	0.523333	0.253333	1.45667	3	RecName: Full=Premnaspirodiene oxygenase; Short=HPO; EC=1.14.13.121; AltName: Full=Cytochrome P450 71D55;	SubName: Full=Uncharacterized protein {ECO:0000313|EnsemblPlants:PGSC0003DMT400026679};
SMEL_009g329180.1	17.9133	24.43	36.7733	3	--	SubName: Full=Uncharacterized protein {ECO:0000313|EMBL:PHT38493.1};
SMEL_009g329660.1	1.11333	1.69333	4.58	3	RecName: Full=Potassium transporter 5; Short=AtHAK1; Short=AtHAK5; Short=AtPOT5;	RecName: Full=Potassium transporter {ECO:0000256|RuleBase:RU321113};
SMEL_009g329820.1	17.1167	22.8067	40.2033	3	RecName: Full=Thiamine pyrophosphokinase 2; Short=AtTPK2; EC=2.7.6.2; AltName: Full=Thiamine kinase 2;	SubName: Full=Uncharacterized protein {ECO:0000313|EnsemblPlants:PGSC0003DMT400029576};
SMEL_009g329830.1	25.6633	36.3133	55.2867	3	RecName: Full=Thiamine pyrophosphokinase 2; Short=AtTPK2; EC=2.7.6.2; AltName: Full=Thiamine kinase 2;	SubName: Full=Uncharacterized protein {ECO:0000313|EnsemblPlants:PGSC0003DMT400029575};
SMEL_009g330240.1	36.9933	58.1033	73.65	9	RecName: Full=Ethylene-responsive transcription factor RAP2-3; AltName: Full=Cadmium-induced protein AS30; AltName: Full=Ethylene response factor 72; Short=ERF72; AltName: Full=Ethylene-responsive element binding protein; Short=AtEBP; AltName: Full=Protein RELATED TO APETALA2 3; Short=Related to AP2 3;	SubName: Full=Uncharacterized protein {ECO:0000313|EnsemblPlants:PGSC0003DMT400081322};
SMEL_009g330580.1	29.5633	131.66	154.927	9	RecName: Full=2-hydroxyisoflavanone dehydratase; EC=3.1.1.1; EC=4.2.1.105; AltName: Full=Carboxylesterase HIDM;	SubName: Full=Uncharacterized protein {ECO:0000313|EnsemblPlants:PGSC0003DMT400081445};
SMEL_009g331400.1	10.21	14.9967	18.9533	9	RecName: Full=Pentatricopeptide repeat-containing protein At3g22690;	SubName: Full=Uncharacterized protein {ECO:0000313|EnsemblPlants:Solyc09g082450.1.1};
SMEL_009g332580.1	6.18667	12.1767	27.04	3	RecName: Full=Probable xyloglucan endotransglucosylase/hydrolase protein 33; Short=At-XTH33; Short=XTH-33; EC=2.4.1.207; Flags: Precursor;	RecName: Full=Xyloglucan endotransglucosylase/hydrolase {ECO:0000256|RuleBase:RU361120}; EC=2.4.1.207 {ECO:0000256|RuleBase:RU361120};
SMEL_009g333090.1	4.09333	3.46333	8.69333	3	RecName: Full=Pathogenesis-related protein STH-2;	SubName: Full=Uncharacterized protein {ECO:0000313|EnsemblPlants:Solyc09g091000.2.1};
SMEL_009g333490.1	2.38667	3.47667	5.14	3	RecName: Full=Serine/threonine-protein kinase EDR1; EC=2.7.11.1; AltName: Full=MAPKK kinase EDR1; AltName: Full=Protein ENHANCED DISEASE RESISTANCE 1; Short=AtEDR1; AltName: Full=Serine/threonine/tyrosine-protein kinase 10;	SubName: Full=Uncharacterized protein {ECO:0000313|EnsemblPlants:PGSC0003DMT400076173};
SMEL_009g333790.1	0.393333	2.12333	3.07333	9	RecName: Full=Probable indole-3-pyruvate monooxygenase YUCCA3; EC=1.14.13.168; AltName: Full=Flavin-containing monooxygenase YUCCA3;	RecName: Full=Flavin-containing monooxygenase {ECO:0000256|RuleBase:RU361177}; EC=1.-.-.- {ECO:0000256|RuleBase:RU361177};
SMEL_009g334080.1	1.57667	1.57	3.6	3	RecName: Full=Epimerase family protein SDR39U1 homolog, chloroplastic {ECO:0000305}; EC=1.1.1.-; AltName: Full=Protein GIANT CHLOROPLAST 1 {ECO:0000303|PubMed:15120068}; AltName: Full=Protein SulA homolog {ECO:0000303|PubMed:15208387}; Short=AtSulA {ECO:0000303|PubMed:15208387}; Flags: Precursor;	SubName: Full=Uncharacterized protein {ECO:0000313|EnsemblPlants:PGSC0003DMT400080357};
SMEL_009g334440.1	23.46	67.8967	79.6667	9	RecName: Full=Pleiotropic drug resistance protein 1; AltName: Full=NpPDR1;	SubName: Full=Uncharacterized protein {ECO:0000313|EnsemblPlants:PGSC0003DMT400076209};
SMEL_009g335300.1	3.70333	3.75333	7.95333	3	RecName: Full=Pirin-like protein;	SubName: Full=Pirin-like protein {ECO:0000313|EMBL:PHT85171.1};
SMEL_009g336050.1	87.86	195.267	208.253	9	RecName: Full=UDP-glucuronate 4-epimerase 6; EC=5.1.3.6; AltName: Full=UDP-glucuronic acid epimerase 6; Short=AtUGlcAE2;	SubName: Full=Uncharacterized protein {ECO:0000313|EnsemblPlants:Solyc09g092330.1.1};
SMEL_010g337400.1	15.6933	145.743	176.333	9	--	SubName: Full=Uncharacterized protein {ECO:0000313|EMBL:PHT67352.1};
SMEL_010g337460.1	6.50667	12.06	12.8133	9	RecName: Full=Pentatricopeptide repeat-containing protein At3g29230;	SubName: Full=Uncharacterized protein {ECO:0000313|EnsemblPlants:Solyc05g009400.1.1};
SMEL_010g337480.1	51.7467	123.957	140.347	9	--	SubName: Full=Uncharacterized protein {ECO:0000313|EnsemblPlants:Solyc05g009420.1.1};
SMEL_010g337930.1	3.36333	6.17667	6.40667	9	RecName: Full=Rust resistance kinase Lr10 {ECO:0000312|EMBL:AAC49629.1}; EC=2.7.11.1; AltName: Full=Probable receptor-like serine/threonine-protein kinase LRK10; Flags: Precursor;	SubName: Full=Putative receptor-like protein kinase {ECO:0000313|EMBL:PHU01958.1};
SMEL_010g340130.1	18.41	34.1133	35.07	9	RecName: Full=Acetyl-CoA-benzylalcohol acetyltransferase; Short=CbBEAT-1; EC=2.3.1.224;	SubName: Full=Uncharacterized protein {ECO:0000313|EnsemblPlants:PGSC0003DMT400020180};
SMEL_010g340200.1	10.7167	12.0867	20.2033	3	RecName: Full=Xyloglucan endotransglucosylase/hydrolase protein 15 {ECO:0000303|PubMed:12514239}; Short=At-XTH15 {ECO:0000303|PubMed:12514239}; Short=XTH-15 {ECO:0000303|PubMed:12514239}; EC=2.4.1.207 {ECO:0000269|PubMed:25446234}; EC=3.2.1.151 {ECO:0000269|PubMed:25446234}; Flags: Precursor;	SubName: Full=Putative concanavalin A-like lectin/glucanase domain, Xyloglucan endotransglucosylase/hydrolase {ECO:0000313|EMBL:OTG07686.1};
SMEL_010g340210.1	6.04667	7.67333	12.6867	3	RecName: Full=Xyloglucan endotransglucosylase/hydrolase protein 15 {ECO:0000303|PubMed:12514239}; Short=At-XTH15 {ECO:0000303|PubMed:12514239}; Short=XTH-15 {ECO:0000303|PubMed:12514239}; EC=2.4.1.207 {ECO:0000269|PubMed:25446234}; EC=3.2.1.151 {ECO:0000269|PubMed:25446234}; Flags: Precursor;	SubName: Full=Putative concanavalin A-like lectin/glucanase domain, Xyloglucan endotransglucosylase/hydrolase {ECO:0000313|EMBL:OTG07686.1};
SMEL_010g342020.1	10.2633	11.66	22.2267	3	RecName: Full=L-aspartate oxidase, chloroplastic; EC=1.4.3.16; AltName: Full=Protein FLAGELLIN-INSENSITIVE 4; Flags: Precursor;	RecName: Full=L-aspartate oxidase {ECO:0000256|RuleBase:RU362049}; EC=1.4.3.16 {ECO:0000256|RuleBase:RU362049};
SMEL_010g343620.1	2.06333	2.69667	4.86333	3	--	SubName: Full=uncharacterized protein LOC104220060 isoform X1 {ECO:0000313|RefSeq:XP_009769158.1};
SMEL_010g344230.1	0.303333	0.64	1.62667	3	--	SubName: Full=uncharacterized protein LOC104225070 {ECO:0000313|RefSeq:XP_009775134.1};
SMEL_010g344980.1	18.55	37.5567	44.9	9	RecName: Full=Lipid phosphate phosphatase delta; Short=AtLPPD; EC=3.1.3.-; AltName: Full=Phosphatidic acid phosphatase delta; AltName: Full=Sphingoid phosphate phosphatase 1; Short=AtSSP1; AltName: Full=Sphingosine-1-phosphate phosphatase; Short=AtSPPASE;	SubName: Full=Uncharacterized protein {ECO:0000313|EnsemblPlants:PGSC0003DMT400002830};
SMEL_010g344990.1	0.716667	3.02	4.21333	9	RecName: Full=Fatty acyl-CoA reductase 2 {ECO:0000305}; EC=1.2.1.84 {ECO:0000269|PubMed:19062129}; AltName: Full=Fatty acid reductase 2; AltName: Full=Male sterility protein 2;	RecName: Full=Fatty acyl-CoA reductase {ECO:0000256|RuleBase:RU363097}; EC=1.2.1.84 {ECO:0000256|RuleBase:RU363097};
SMEL_010g347130.1	8.10333	16.73	23.5367	9	RecName: Full=Probable 2-oxoglutarate-dependent dioxygenase At5g05600 {ECO:0000305}; EC=1.14.11.- {ECO:0000305};	SubName: Full=Uncharacterized protein {ECO:0000313|EnsemblPlants:PGSC0003DMT400031149};
SMEL_010g350160.1	1.03333	1.77667	3.6	3	RecName: Full=Putative late blight resistance protein homolog R1B-16;	SubName: Full=Uncharacterized protein {ECO:0000313|EnsemblPlants:Solyc05g012740.1.1};
SMEL_010g350220.1	29.9467	48.7233	70.4733	3	RecName: Full=Beta-1,3-galactosyltransferase GALT1 {ECO:0000305}; EC=2.4.1.- {ECO:0000269|PubMed:17630273}; AltName: Full=Beta-1,3-galactosyltransferase 15 {ECO:0000305}; AltName: Full=Galactosyltransferase 1 {ECO:0000303|PubMed:17630273};	SubName: Full=Uncharacterized protein {ECO:0000313|EnsemblPlants:Solyc05g007930.2.1};
SMEL_010g350820.1	0.81	1.35	2.60333	3	--	SubName: Full=Uncharacterized protein {ECO:0000313|EnsemblPlants:Solyc05g012500.2.1};
SMEL_010g350830.1	7.78	22.0133	30.4233	9	RecName: Full=Probable WRKY transcription factor 57; AltName: Full=WRKY DNA-binding protein 57;	SubName: Full=Uncharacterized protein {ECO:0000313|EnsemblPlants:Solyc05g012500.2.1};
SMEL_010g351530.1	8.77	10.1467	29.7067	3	RecName: Full=Aspartate aminotransferase, mitochondrial; EC=2.6.1.1; AltName: Full=Transaminase A; Flags: Precursor;	RecName: Full=Aspartate aminotransferase {ECO:0000256|RuleBase:RU000480}; EC=2.6.1.1 {ECO:0000256|RuleBase:RU000480};
SMEL_010g352570.1	3.94667	6.63667	7.9	9	--	SubName: Full=Uncharacterized protein {ECO:0000313|EMBL:KJB23593.1};
SMEL_010g352620.1	6.75333	10.7467	12.8	9	--	SubName: Full=Uncharacterized protein {ECO:0000313|EnsemblPlants:Solyc06g068540.2.1};
SMEL_010g352730.1	37.3467	75.6533	192.99	3	RecName: Full=Pyruvate decarboxylase 1; Short=AtPDC1; EC=4.1.1.1;	SubName: Full=pyruvate decarboxylase 1-like {ECO:0000313|RefSeq:XP_016440832.1};
SMEL_010g352930.1	0.703333	2.14667	2.60333	9	RecName: Full=Dehydration-responsive element-binding protein 2E; Short=Protein DREB2E; AltName: Full=Dehydration response element-binding protein 19 {ECO:0000303|PubMed:21069430};	SubName: Full=Uncharacterized protein {ECO:0000313|EnsemblPlants:PGSC0003DMT400041064};
SMEL_010g354280.1	3.18333	15.52	24.01	9	RecName: Full=Probable WRKY transcription factor 70; AltName: Full=WRKY DNA-binding protein 70;	SubName: Full=Uncharacterized protein {ECO:0000313|EMBL:PHT70119.1};
SMEL_010g354860.1	19.7633	37.7533	124.543	3	RecName: Full=Abscisic acid receptor PYL4; AltName: Full=ABI1-binding protein 2; AltName: Full=PYR1-like protein 4; AltName: Full=Regulatory components of ABA receptor 10;	SubName: Full=Uncharacterized protein {ECO:0000313|EnsemblPlants:PGSC0003DMT400028658};
SMEL_010g355020.1	40.2733	74.02	93.09	9	RecName: Full=CBL-interacting serine/threonine-protein kinase 14; EC=2.7.11.1; AltName: Full=SNF1-related kinase 3.15; AltName: Full=SOS2-like protein kinase PKS24; AltName: Full=Serine/threonine-protein kinase SR1; Short=AtSR1;	RecName: Full=Non-specific serine/threonine protein kinase {ECO:0000256|SAAS:SAAS00351747}; EC=2.7.11.1 {ECO:0000256|SAAS:SAAS00351747};
SMEL_010g355280.1	42.8033	74.01	103.267	9	RecName: Full=MACPF domain-containing protein CAD1; AltName: Full=Protein CONSTITUTIVELY ACTIVATED CELL DEATH 1; Short=Protein CAD1;	SubName: Full=Uncharacterized protein {ECO:0000313|EnsemblPlants:Solyc10g085710.1.1};
SMEL_010g357070.1	1.07	2.22667	4.41	3	RecName: Full=Transcription factor MYB27 {ECO:0000303|PubMed:9839469}; AltName: Full=Myb-related protein 27 {ECO:0000303|PubMed:9839469}; Short=AtMYB27 {ECO:0000303|PubMed:9839469};	SubName: Full=Uncharacterized protein {ECO:0000313|EnsemblPlants:Solyc10g083900.1.1};
SMEL_010g358700.1	1.45	4.66333	5.69333	9	RecName: Full=3-oxoacyl-[acyl-carrier-protein] reductase, chloroplastic; EC=1.1.1.100; AltName: Full=3-ketoacyl-acyl carrier protein reductase; Flags: Precursor;	SubName: Full=Uncharacterized protein {ECO:0000313|EnsemblPlants:Solyc10g078360.1.1};
SMEL_010g359430.1	291.227	523.077	639.837	9	--	SubName: Full=Putative ovule protein {ECO:0000313|EMBL:JAP15583.1};
SMEL_010g360270.1	1.63667	1.11333	3.57333	3	RecName: Full=Zeatin O-glucosyltransferase; EC=2.4.1.203; AltName: Full=Trans-zeatin O-beta-D-glucosyltransferase;	SubName: Full=Uncharacterized protein {ECO:0000313|EnsemblPlants:PGSC0003DMT400076695};
SMEL_010g360960.1	0.746667	0.646667	1.85667	3	RecName: Full=Patatin-like protein 6; Short=AtPLP6; EC=3.1.1.-; AltName: Full=Patatin-related phospholipase A IIIalpha; Short=pPLAIIIa; AltName: Full=Phospholipase A IIB; Short=AtPLAIIB;	RecName: Full=Patatin {ECO:0000256|RuleBase:RU361262}; EC=3.1.1.- {ECO:0000256|RuleBase:RU361262};
SMEL_011g362390.1	1.54	2.34333	2.88667	9	--	SubName: Full=importin-5-like {ECO:0000313|RefSeq:XP_009779350.1};
SMEL_011g362990.1	0.766667	0.923333	2.77	3	--	SubName: Full=Uncharacterized protein {ECO:0000313|EnsemblPlants:Solyc11g012500.1.1};
SMEL_011g363360.1	9.08667	9.71	17.9167	3	RecName: Full=Ubiquinol oxidase 4, chloroplastic/chromoplastic; EC=1.10.3.11; AltName: Full=Alternative oxidase 4; AltName: Full=Plastid terminal oxidase; AltName: Full=Protein IMMUTANS; Flags: Precursor;	RecName: Full=Ubiquinol oxidase {ECO:0000256|RuleBase:RU003779}; EC=1.10.3.11 {ECO:0000256|RuleBase:RU003779};
SMEL_011g363570.1	1.27667	1.63667	3.05667	3	RecName: Full=TMV resistance protein N;	SubName: Full=Tmv resistance protein n {ECO:0000313|EMBL:OIT27720.1};
SMEL_011g363600.1	7.71	33.9867	41.6133	9	--	SubName: Full=Uncharacterized protein {ECO:0000313|EnsemblPlants:PGSC0003DMT400040461};
SMEL_011g363910.1	4.62667	5.27	18.68	3	RecName: Full=8-hydroxygeraniol dehydrogenase; Short=Cr10HGO; EC=1.1.1.324;	SubName: Full=Uncharacterized protein {ECO:0000313|EnsemblPlants:Solyc11g011340.1.1};
SMEL_011g364320.1	4.12667	4.35667	7.56667	3	--	SubName: Full=Uncharacterized protein {ECO:0000313|EnsemblPlants:PGSC0003DMT400041779};
SMEL_011g365870.1	1.07	1.04667	3.82667	3	RecName: Full=Cytochrome P450 71D7; EC=1.14.-.-;	SubName: Full=Uncharacterized protein {ECO:0000313|EnsemblPlants:Solyc11g007980.1.1};
SMEL_011g366450.1	1.63	2.34667	4.59	3	RecName: Full=Beta-D-glucosyl crocetin beta-1,6-glucosyltransferase; EC=2.4.1.330 {ECO:0000269|PubMed:22569263}; AltName: Full=UDP-glucose glucosyltransferase 9; Short=GjUGT9; AltName: Full=UDP-glycosyltransferase 94E5;	RecName: Full=Glycosyltransferase {ECO:0000256|RuleBase:RU362057}; EC=2.4.1.- {ECO:0000256|RuleBase:RU362057};
SMEL_011g366460.1	1.49333	1.03333	3.28	3	RecName: Full=Beta-D-glucosyl crocetin beta-1,6-glucosyltransferase; EC=2.4.1.330 {ECO:0000269|PubMed:22569263}; AltName: Full=UDP-glucose glucosyltransferase 9; Short=GjUGT9; AltName: Full=UDP-glycosyltransferase 94E5;	RecName: Full=Glycosyltransferase {ECO:0000256|RuleBase:RU362057}; EC=2.4.1.- {ECO:0000256|RuleBase:RU362057};
SMEL_011g366950.1	13.77	19.67	34.5467	3	RecName: Full=Cytochrome c oxidase assembly protein COX15;	SubName: Full=Uncharacterized protein {ECO:0000313|EnsemblPlants:PGSC0003DMT400061587};
SMEL_011g367050.1	74.8633	121.89	211.577	3	RecName: Full=Leucine-rich repeat extensin-like protein 1; Short=AtLRX1; Short=LRR/EXTENSIN1; AltName: Full=Cell wall hydroxyproline-rich glycoprotein; Flags: Precursor;	SubName: Full=Putative leucine-rich repeat extensin-like protein 2-like {ECO:0000313|EMBL:JAP30540.1}; Flags: Fragment;
SMEL_011g367450.1	351.893	564.42	636.06	9	--	SubName: Full=Uncharacterized protein {ECO:0000313|EnsemblPlants:PGSC0003DMT400042669};
SMEL_011g367790.1	1.38	1.36667	3.6	3	RecName: Full=TPR repeat-containing thioredoxin TTL4; AltName: Full=Tetratricopeptide repeat thioredoxin-like 4;	SubName: Full=Uncharacterized protein {ECO:0000313|EnsemblPlants:PGSC0003DMT400053134};
SMEL_011g368380.1	14.8833	31.2833	63.24	3	--	SubName: Full=Uncharacterized protein {ECO:0000313|EnsemblPlants:Solyc04g054340.1.1};
SMEL_011g369840.1	8.56667	14.8233	15.53	9	--	SubName: Full=Uncharacterized protein {ECO:0000313|EnsemblPlants:PGSC0003DMT400043622};
SMEL_011g371050.1	10.5967	13.8667	42.3067	3	RecName: Full=Glutamate decarboxylase 4; Short=GAD 4; EC=4.1.1.15;	RecName: Full=Glutamate decarboxylase {ECO:0000256|RuleBase:RU361171}; EC=4.1.1.15 {ECO:0000256|RuleBase:RU361171};
SMEL_011g372560.1	34.0167	56.3833	70.17	9	--	SubName: Full=Uncharacterized protein {ECO:0000313|EnsemblPlants:PGSC0003DMT400019325};
SMEL_011g372740.1	5.43667	9.15	21.4267	3	--	SubName: Full=Uncharacterized protein {ECO:0000313|EnsemblPlants:PGSC0003DMT400041025};
SMEL_011g373620.1	11.4467	14.9767	23.2067	3	RecName: Full=HMG-Y-related protein A; Short=ZmHMGA; AltName: Full=High mobility group A protein;	SubName: Full=Uncharacterized protein {ECO:0000313|EnsemblPlants:Solyc04g007720.2.1};
SMEL_011g373730.1	145.3	320.333	392.09	9	RecName: Full=Heavy metal-associated isoprenylated plant protein 22 {ECO:0000303|PubMed:21072340, ECO:0000303|PubMed:23368984}; Short=AtHIP22 {ECO:0000303|PubMed:23368984}; Short=AtHIPP22 {ECO:0000303|PubMed:21072340, ECO:0000303|PubMed:23368984}; AltName: Full=Farnesylated protein 7 {ECO:0000303|PubMed:8837031}; Short=AtFP7 {ECO:0000303|PubMed:8837031}; Flags: Precursor;	SubName: Full=Heavy metal-associated isoprenylated plant protein 26 {ECO:0000313|EMBL:PHT38954.1};
SMEL_011g373740.1	3.17	6.43	7.79	9	RecName: Full=Heavy metal-associated isoprenylated plant protein 20 {ECO:0000303|PubMed:21072340, ECO:0000303|PubMed:23368984}; Short=AtHIP20 {ECO:0000303|PubMed:23368984}; Short=AtHIPP20 {ECO:0000303|PubMed:21072340}; Flags: Precursor;	SubName: Full=Heavy metal-associated isoprenylated plant protein 26 {ECO:0000313|EMBL:PHT38954.1};
SMEL_011g375060.1	2.40667	6.55333	9.79333	9	RecName: Full=Lignin-forming anionic peroxidase; EC=1.11.1.7; Flags: Precursor;	RecName: Full=Peroxidase {ECO:0000256|SAAS:SAAS00709852}; EC=1.11.1.7 {ECO:0000256|SAAS:SAAS00709852};
SMEL_011g375070.1	4.23	12.3367	13.06	9	RecName: Full=Lignin-forming anionic peroxidase; EC=1.11.1.7; Flags: Precursor;	SubName: Full=lignin-forming anionic peroxidase-like {ECO:0000313|RefSeq:XP_016567765.1};
SMEL_011g376900.1	0.283333	0.52	1.20333	3	RecName: Full=LRR receptor-like serine/threonine-protein kinase FLS2; EC=2.7.11.1; AltName: Full=Protein FLAGELLIN-SENSING 2; AltName: Full=Protein FLAGELLIN-SENSITIVE 2; Flags: Precursor;	SubName: Full=Uncharacterized protein {ECO:0000313|EnsemblPlants:Solyc04g015980.2.1};
SMEL_011g376910.1	0.103333	0.17	0.363333	3	RecName: Full=LRR receptor-like serine/threonine-protein kinase FLS2; EC=2.7.11.1; AltName: Full=Protein FLAGELLIN-SENSING 2; AltName: Full=Protein FLAGELLIN-SENSITIVE 2; Flags: Precursor;	SubName: Full=Uncharacterized protein {ECO:0000313|EMBL:PHU16775.1};
SMEL_011g378220.1	2.14667	5.36667	8.96667	9	--	SubName: Full=Uncharacterized protein {ECO:0000313|EnsemblPlants:PGSC0003DMT400016270};
SMEL_011g378260.1	19.6033	31.2267	37.1933	9	RecName: Full=Putative late blight resistance protein homolog R1A-6;	SubName: Full=Late blight resistance protein Rpi-amr3 {ECO:0000313|EMBL:AMY98955.1};
SMEL_011g378630.1	14.6667	21.81	28.55	9	RecName: Full=Putative late blight resistance protein homolog R1A-6;	SubName: Full=Late blight resistance protein Rpi-amr3 {ECO:0000313|EMBL:AMY98955.1};
SMEL_011g378790.1	6.77333	16.63	18.3433	9	RecName: Full=Transmembrane 9 superfamily member 4 {ECO:0000305}; AltName: Full=Endomembrane protein 10 {ECO:0000303|PubMed:22570441}; AltName: Full=Transmembrane nine protein 4 {ECO:0000303|PubMed:20681974}; Short=AtTMN4 {ECO:0000303|PubMed:20681974}; Flags: Precursor;	RecName: Full=Transmembrane 9 superfamily member {ECO:0000256|RuleBase:RU363079};
SMEL_011g378890.1	2.75667	3.47667	5.54	3	RecName: Full=Probable LRR receptor-like serine/threonine-protein kinase At3g47570; EC=2.7.11.1; Flags: Precursor;	SubName: Full=Uncharacterized protein {ECO:0000313|EnsemblPlants:Solyc04g015980.2.1};
SMEL_011g379210.1	0.433333	0.66	1.20333	3	RecName: Full=Receptor kinase-like protein Xa21 {ECO:0000303|PubMed:22735448}; EC=2.7.11.1 {ECO:0000250|UniProtKB:Q1MX30, ECO:0000255|PROSITE-ProRule:PRU00159}; Contains: RecName: Full=Receptor kinase-like protein Xa21, processed {ECO:0000303|PubMed:22735448}; Flags: Precursor;	SubName: Full=Uncharacterized protein {ECO:0000313|EnsemblPlants:Solyc04g015980.2.1};
SMEL_011g379230.1	3.35667	5.40333	10.2233	3	RecName: Full=Receptor kinase-like protein Xa21 {ECO:0000303|Ref.1}; EC=2.7.11.1 {ECO:0000255|PROSITE-ProRule:PRU00159, ECO:0000269|PubMed:11927577}; Contains: RecName: Full=Receptor kinase-like protein Xa21, processed {ECO:0000250|UniProtKB:Q2R2D5}; Flags: Precursor;	SubName: Full=LRR receptor-like serine/threonine-protein kinase EFR {ECO:0000313|RefSeq:XP_016572084.1};
SMEL_012g380230.1	1.48667	2.26	3.26333	3	RecName: Full=Lycopene epsilon cyclase, chloroplastic {ECO:0000305}; EC=5.5.1.18 {ECO:0000250|UniProtKB:Q38932}; Flags: Precursor;	SubName: Full=Lycopene epsilon cyclase {ECO:0000313|EMBL:DAA33890.1};
SMEL_012g380720.1	25.1067	44.7267	77.9067	3	RecName: Full=Probable glutamate carboxypeptidase LAMP1 {ECO:0000305}; EC=3.4.17.21 {ECO:0000305}; AltName: Full=Protein LIKE AMP1 {ECO:0000303|PubMed:25673776};	SubName: Full=Uncharacterized protein {ECO:0000313|EnsemblPlants:PGSC0003DMT400000952};
SMEL_012g380770.1	4.15333	7.97333	9.64333	9	RecName: Full=Receptor-like protein kinase HSL1; EC=2.7.11.1; AltName: Full=Protein HAESA-LIKE1; Flags: Precursor;	SubName: Full=Uncharacterized protein {ECO:0000313|EnsemblPlants:Solyc12g008500.1.1};
SMEL_012g380820.1	6.53667	16.15	20.0233	9	RecName: Full=E3 ubiquitin-protein ligase RDUF1 {ECO:0000305}; EC=2.3.2.27 {ECO:0000305}; AltName: Full=RING and DUF1117 domain-containing protein 1 {ECO:0000305}; Short=AtRDUF1 {ECO:0000303|PubMed:22405823}; AltName: Full=RING-type E3 ubiquitin transferase RDUF1 {ECO:0000305};	SubName: Full=Uncharacterized protein {ECO:0000313|EnsemblPlants:PGSC0003DMT400001037};
SMEL_012g381100.1	100.397	198.103	208.25	9	RecName: Full=Proline-rich receptor-like protein kinase PERK1; EC=2.7.11.1; AltName: Full=Proline-rich extensin-like receptor kinase 1; Short=AtPERK1;	SubName: Full=Putative ovule protein {ECO:0000313|EMBL:JAP34248.1}; SubName: Full=Putative proline-rich receptor-like protein kinase PERK1-like {ECO:0000313|EMBL:JAP34753.1};
SMEL_012g381110.1	39.4633	62.6667	93.4267	3	RecName: Full=Protein CfxQ homolog;	SubName: Full=Uncharacterized protein {ECO:0000313|EnsemblPlants:Solyc12g007100.1.1};
SMEL_012g381600.1	0.04	0.28	0.65	3	RecName: Full=Early nodulin-93; Short=N-93;	SubName: Full=Early nodulin-93 {ECO:0000313|EMBL:PHT31484.1};
SMEL_012g382400.1	19.38	31.55	42.13	9	RecName: Full=Receptor-like protein Cf-9 {ECO:0000305}; Flags: Precursor;	SubName: Full=Uncharacterized protein {ECO:0000313|EnsemblPlants:PGSC0003DMT400007484};
SMEL_012g383570.1	8.06667	9.66333	16.0267	3	RecName: Full=Probable magnesium transporter NIPA6;	RecName: Full=Probable magnesium transporter {ECO:0000256|RuleBase:RU363078};
SMEL_012g388580.1	0.143333	0.083333	1.20333	3	RecName: Full=Aminotransferase ALD1, chloroplastic; EC=2.6.1.- {ECO:0000305}; AltName: Full=AGD2-like defense response protein 1 {ECO:0000303|PubMed:14729919}; Flags: Precursor;	SubName: Full=Uncharacterized protein {ECO:0000313|EnsemblPlants:PGSC0003DMT400059031};
SMEL_012g390670.1	21.55	45.6267	56.3933	9	RecName: Full=SUN domain-containing protein 4 {ECO:0000305}; Short=AtSUN4 {ECO:0000303|PubMed:25217773};	SubName: Full=Putative ovule protein {ECO:0000313|EMBL:JAP34314.1};
SMEL_012g391480.1	55.9533	101.017	135.853	9	RecName: Full=Calmodulin-binding transcription activator 3 {ECO:0000303|PubMed:11925432}; Short=AtCAMTA3 {ECO:0000303|PubMed:11925432}; AltName: Full=Ethylene-induced calmodulin-binding protein 1 {ECO:0000303|PubMed:11162426}; Short=EICBP1 {ECO:0000303|PubMed:11162426}; AltName: Full=Ethylene-induced calmodulin-binding protein a {ECO:0000303|PubMed:11782485}; Short=EICBP.a {ECO:0000303|PubMed:117…	SubName: Full=Calmodulin-binding protein {ECO:0000313|EMBL:ADK47999.1};
SMEL_012g391500.1	5.51	5.92667	11.4767	3	--	SubName: Full=Uncharacterized protein {ECO:0000313|EnsemblPlants:PGSC0003DMT400004735};
SMEL_012g393080.1	2.74	1.28	6.79667	3	RecName: Full=Pathogenesis-related protein STH-2;	SubName: Full=Uncharacterized protein {ECO:0000313|EnsemblPlants:Solyc09g091000.2.1};
SMEL_012g393110.1	3.82	3.63667	8.90667	3	--	--
SMEL_012g395980.1	40.5067	71.1733	113.077	3	RecName: Full=Aluminum-activated malate transporter 2; Short=AtALMT2;	SubName: Full=Uncharacterized protein {ECO:0000313|EnsemblPlants:Solyc11g071350.1.1};
SMEL_012g396080.1	1.69	4.35	5.83667	9	RecName: Full=E3 ubiquitin-protein ligase PUB23; EC=2.3.2.27; AltName: Full=Plant U-box protein 23; AltName: Full=RING-type E3 ubiquitin transferase PUB23 {ECO:0000305}; AltName: Full=U-box domain-containing protein 23;	RecName: Full=RING-type E3 ubiquitin transferase {ECO:0000256|SAAS:SAAS00702733}; EC=2.3.2.27 {ECO:0000256|SAAS:SAAS00702733};
SMEL_012g396620.1	24.4933	33.7833	56.0067	3	RecName: Full=NAC domain-containing protein 90; Short=ANAC090;	SubName: Full=Uncharacterized protein {ECO:0000313|EnsemblPlants:Solyc11g068620.1.1};
