# Supplementary material for: Transcriptome and metabolome response of eggplant against Ralstonia solanacearum infection
Source: PeerJ. 2023 Jan 11;11:e14658. doi: 10.7717/peerj.14658 (PMC9840387; doi:10.7717/peerj.14658)
Supplement: Supplemental Information 7 [file peerj-11-14658-s007.xlsx]

## Sheet: Sheet1
Index	Q1 (Da)	Q3 (Da)	Molecular Weight (Da)	Formula	Ionization model	Compounds	CAS	R0h-1	R0h-2	R0h-3	R24h-1	R24h-2	R24h-3	R48h-1	R48h-2	R48h-3	kegg_map
pme3200	74	57	73.097	C2H7N3	[M+H]+	1-methylguanidine	471-29-4	58795	47016	48042	48339	42026	60456	42182	33354	37097	--
Zmyn000268	89.02	71.02	90.032	C3H6O3	[M-H]-	2,3-Dihydroxypropanal	56-82-6	11624	10568	13825	9713.8	4258.6	4879.5	25272	13645	9	--
Lmqp000873	101.02	55.02	100.018	C4H4O3	[M+H]+	Succinic anhydride	108-30-5	244840	203160	188410	198780	229230	243280	175890	166810	182930	--
Lmgn000219	101.02	55.02	102.032	C4H6O3	[M-H]-	Succinic semialdehyde	692-29-5	19934	10987	5639.1	16330	13462	12722	17848	15842	11254	ko00250,ko00350,ko00650,ko00750,ko00760,ko01100,ko01200
pme3011	104.07	68.8	103.063	C4H9NO2	[M+H]+	γ-Aminobutyric acid	56-12-2	2669800	3077300	1941500	2110600	2935800	2212100	2303300	2020600	2333400	ko00250,ko00330,ko00410,ko00650,ko00760,ko01100
pme3017	104.07	58	103.063	C4H9NO2	[M+H]+	2-Aminoisobutyric acid	62-57-7	2060100	1772700	1443300	1388600	1879600	1389100	1428300	1412800	1612400	--
pme3033	104.07	86	103.063	C4H9NO2	[M+H]+	N,N-Dimethylglycine	1118-68-9	1819100	1984700	1363500	1407600	1959200	1513300	1590000	1349000	1599300	ko00260,ko01100
pme1975	103	59	104.06	C3H4O4	[M-H]-	Malonic acid	141-82-2	103440	103710	91887	120170	91403	64632	92994	115480	131270	ko00061,ko00240,ko00410,ko01100,ko01212
pme0010	106	60	105.043	C3H7NO3	[M+H]+	L-Serine	56-45-1	84255	62767	39222	34448	57978	44347	43492	34266	39647	ko00260,ko00261,ko00270,ko00460,ko00600,ko00630,ko00920,ko00970,ko01100,ko01110,ko01200,ko01230,ko01502,ko02010
mws0255	112.05	95	111.043	C4H5N3O	[M+H]+	Cytosine	71-30-7	204140	188130	200430	205710	176840	145220	154560	191380	167310	ko00240,ko01100
pme0257	111.02	80	112.027	C4H4N2O2	[M-H]-	Uracil	66-22-8	159950	203180	203710	212530	189160	234700	238080	183690	218010	ko00240,ko00410,ko00770,ko01100
pme0275	115.05	97	115.04	C5H7O3-	[M]-	4-Oxopentanoic Acid	123-76-2	7238.7	9	8732.5	9	9	10696	11902	9	9568.4	--
pme0006	116.07	70.1	115.063	C5H9NO2	[M+H]+	L-Proline	147-85-3	7214300	3210700	2160000	2478500	4942200	2133800	3604800	3456700	5033100	ko00330,ko00332,ko00970,ko01100,ko01110,ko01230,ko02010
mws0376	115	71	116.011	C4H4O4	[M-H]-	Fumaric acid	110-17-8	295910	324960	369250	364740	320780	286810	637240	348060	322990	ko00020,ko00190,ko00220,ko00250,ko00350,ko00360,ko00620,ko00650,ko00760,ko01100,ko01110,ko01200
mws0823	115.04	71	116.047	C5H8O3	[M-H]-	3-Methyl-2-Oxobutanoic acid	759-05-7	44216	32309	48079	30257	43955	47616	47049	42407	52780	ko00280,ko00290,ko00770,ko00966,ko01100,ko01110,ko01210,ko01230
pme3193	116.04	74	117.043	C4H7NO3	[M-H]-	N-Acetyl-L-glycine	543-24-8	11496	10427	11258	11054	9807.9	13116	10329	8734.6	8316.9	--
pmb1096	118.07	91	117.058	C8H7N	[M+H]+	Indole	120-72-9	121610	132020	120230	87891	169480	97730	142650	108010	171050	ko00380,ko00400,ko00402,ko01100,ko01110
mws2628	118.09	87.05	117.07	C5H11NO2	[M+H]+	N-Methyl-4-aminobutyric acid	1119-48-8	915690	979130	872690	1066000	1224000	828610	1102700	1009200	1335300	ko00760,ko01100
pme0120	118.09	101	117.079	C5H11NO2	[M+H]+	5-Aminovaleric acid	660-88-8	36773	28091	28006	23309	31517	28956	35853	22069	29731	ko00310,ko00330,ko01100
mws0256	118.09	72.1	117.079	C5H11NO2	[M+H]+	L-Valine	72-18-4	24824000	22012000	18612000	16924000	24304000	18205000	18068000	19829000	28666000	ko00280,ko00290,ko00311,ko00460,ko00770,ko00966,ko00970,ko01100,ko01110,ko01210,ko01230,ko02010
mws0192	117.02	73	118.027	C4H6O4	[M-H]-	Succinic acid	110-15-6	19283000	13444000	14009000	17279000	18596000	18467000	14333000	14874000	16838000	ko00020,ko00190,ko00250,ko00310,ko00350,ko00360,ko00620,ko00630,ko00640,ko00650,ko00760,ko00920,ko01100,ko01110,ko01200
pme1730	117	59	118.027	C4H6O4	[M-H]-	D-Erythronolactone	15667-21-7	50468	67829	56444	77263	55384	71530	58747	52139	49002	--
mws0470	117.02	73	118.027	C4H6O4	[M-H]-	Methylmalonic acid	516-05-2	19804000	13444000	14027000	17440000	18934000	18661000	14749000	14970000	17173000	ko00240,ko00280,ko00640,ko01100
mws0147	117.06	59	118.063	C5H10O3	[M-H]-	β-Hydroxyisovaleric acid	625-08-1	130560	116760	109370	96491	152600	112200	112790	111710	157700	ko00280,ko01100
pme3096	118	74	119.022	C3H5NO4	[M-H]-	Aminomalonic acid	1068-84-4	895350	614310	647420	768350	861770	789030	644440	651050	759870	--
mws0671	120.07	74.1	119.058	C4H9NO3	[M+H]+	L-Homoserine	672-15-1	70856	61388	41786	41665	50415	41617	46531	37099	36373	ko00260,ko00270,ko00300,ko00920,ko01100,ko01110,ko01230
mws0230	120.07	74	119.058	C4H9NO3	[M+H]+	L-Threonine	72-19-5	79566	60244	54099	37917	49604	56005	45372	41298	61031	ko00260,ko00261,ko00290,ko00860,ko00970,ko01100,ko01110,ko01230,ko02010
pmp001287	120.08	103.05	119.073	C8H9N	[M+H]+	N-Benzylmethylene isomethylamine	-	6523300	5545500	5174400	4951000	6197900	5016000	5569400	5696000	7075400	--
pma0134	121.04	93.06	120.042	C4H8O4	[M+H]+	D-(-)-Threose	95-43-2	108770	113560	199420	125910	109640	101400	130500	89492	108330	--
Lmbp000728	121.06	77.04	120.058	C8H8O	[M+H]+	(S)-2-Phenyloxirane	20780-54-5	4264400	5199600	4411000	6320700	5232000	4638400	4695400	2168100	5063600	ko01100
pme1011	121.08	104	120.069	C7H8N2	[M+H]+	Benzamidine	618-39-3	38954	35720	50232	48282	41639	41998	49125	24055	32963	--
pmb0069	122	105	121	C7H7NO	[M+H]+	Benzamide	55-21-0	112390	114460	105050	134430	109380	111550	130770	107730	124840	--
pme0195	120.02	62	121.02	C3H7NO2S	[M-H]-	L-Cysteine	52-90-4	4219	9166.6	9531.4	15157	4537.5	11425	8181.7	4720.2	6025.6	ko00260,ko00270,ko00311,ko00332,ko00430,ko00460,ko00480,ko00730,ko00770,ko00920,ko00970,ko01100,ko01110,ko01200,ko01230,ko04122
Lmbn001930	121.03	77.04	122.037	C7H6O2	[M-H]-	2-Hydroxybenzaldehyde (Salicylaldehyde)*	90-02-8	13671	14839	18431	12660	13514	13563	13323	14230	15125	ko01100
mws0628	121.03	92	122.037	C7H6O2	[M-H]-	4-Hydroxybenzaldehyde*	123-08-0	1771800	1784200	1950000	2270600	2412700	1931700	2076800	1653000	2119400	ko01100
mws0133	123.06	79.9	122.048	C6H6N2O	[M+H]+	Nicotinamide	98-92-0	1148500	839600	1123500	1131900	1296500	1127000	1044000	750020	864250	ko00760,ko01100
pme0490	124.04	78	123.032	C6H5NO2	[M+H]+	Nicotinic acid*	59-67-6	148650	109120	102850	148420	149950	136850	98264	92930	122460	ko00760,ko00960,ko01100,ko01110
Lmbp000668	124.04	78.03	123.032	C6H5NO2	[M+H]+	Isonicotinic acid*	55-22-1	155940	101320	109470	123670	138250	142870	108630	100200	113160	--
mws0236	124.01	80	125.015	C2H7NO3S	[M-H]-	2-Aminoethanesulfonic acid	107-35-7	14168	12507	9773.2	9283.2	11044	9	14591	15763	11584	ko00430,ko00920,ko01100,ko02010
mws0572	126.07	109	125.059	C5H7N3O	[M+H]+	5-Methylcytosine	554-01-8	102440	77600	108940	126970	102270	94870	116340	83630	107320	ko00240,ko01100
mws0263	128.04	82.03	129.043	C5H7NO3	[M-H]-	5-Oxo-L-Proline	98-79-3	13396	17716	12114	26409	20062	10721	22840	10386	24613	ko00480,ko01100
Rfmb319	130.09	84.08	129.079	C6H11NO2	[M+H]+	Pipecolic acid	4043-87-2	741110	760040	1207900	822200	1044000	654250	1166500	725830	918600	ko00310,ko00960,ko01100,ko01110
ML10181668	130.09	84.08	129.079	C6H11NO2	[M+H]+	Cycloleucine	52-52-8	4110900	3862000	5531300	4651700	5271700	3335700	5922600	3674600	4025400	--
Zmgn000217	129.02	85.03	130.027	C5H6O4	[M-H]-	Methylenesuccinic acid	97-65-4	40015	47462	51468	85683	29809	35071	47466	118770	29232	ko00660,ko01100
mws0425	129.02	85	130.027	C5H6O4	[M-H]-	Citraconic acid	498-23-7	15132	22127	22373	23869	8087.8	24147	37427	28530	36006	ko00290,ko00660,ko01100,ko01210
mws0712	130.05	86	131.058	C5H9NO3	[M-H]-	N-Propionylglycine	21709-90-0	30758	30683	29756	37757	49521	18700	48787	37226	34985	--
Zmpn000638	130.05	88.04	131.069	C4H9N3O2	[M-H]-	3-Guanidinopropionic acid	353-09-3	152300	74852	251030	219910	145140	154270	359630	119870	233190	--
ML10197929	130.09	88.04	131.069	C4H9N3O2	[M-H]-	Creatine	57-00-1	525470	281960	906030	777180	551410	513330	1540600	384960	819210	ko00260,ko00330,ko01100
mws1587	132.1	86	131.095	C6H13NO2	[M+H]+	L-Norleucine*	327-57-1	118220000	109780000	97370000	102360000	109600000	118390000	103220000	106170000	119540000	--
mws0258	132.1	86	131.095	C6H13NO2	[M+H]+	L-Isoleucine*	73-32-5	116470000	107910000	101400000	103100000	110290000	118440000	104880000	107220000	118120000	ko00280,ko00290,ko00460,ko00960,ko00966,ko00970,ko01100,ko01110,ko01210,ko01230,ko02010
mws0227	132.1	86.2	131.095	C6H13NO2	[M+H]+	L-Leucine*	61-90-5	117920000	109930000	99524000	102380000	109380000	118690000	102400000	106830000	118180000	ko00280,ko00290,ko00966,ko00970,ko01100,ko01110,ko01210,ko01230,ko02010
pmp001198	132.1	57.1	131.095	C6H13NO2	[M+H]+	6-Deoxyfagomine	197449-09-5	5555900	4670000	4837800	4182200	5852900	4757600	5320800	4766200	7607600	--
pme0274	132.1	69	131.095	C6H13NO2	[M+H]+	6-Aminocaproic acid	60-32-2	3659800	3697800	4907400	4106300	4908800	3277500	4370900	4792000	5091200	ko01100
Lmbn001288	131.03	87.04	132.042	C5H8O4	[M-H]-	(S)-2-hydroxy-2-methyl-3-oxobutanoic acid	71698-08-3	49288	42112	44227	36509	41636	34122	45723	48890	61651	ko00290,ko00650,ko00660,ko00770,ko01100,ko01110,ko01210,ko01230
mws0473	131.03	87.05	132.042	C5H8O4	[M-H]-	2-Methylsuccinic acid	498-21-5	521990	420650	411410	298990	407680	324920	467000	440850	614770	--
Lmgn000160	131.05	70.03	132.053	C4H8N2O3	[M-H]-	3-Ureidopropionic Acid	462-88-4	14715	7980.3	10750	13843	14590	9994.3	9774.4	9202.1	12144	ko00240,ko00410,ko00770,ko01100
mws0341	131.07	85	132.079	C6H12O3	[M-H]-	2-Hydroxyisocaproic acid*	20312-37-2	20834	19515	15319	18230	25813	12586	17217	19707	18246	--
pme2527	133	116	132.09	C5H12N2O2	[M+H]+	L-Ornithine	70-26-8	25797	16166	37897	15300	24259	13738	22251	20523	38534	ko00220,ko00330,ko00472,ko00480,ko01100,ko01110,ko01210,ko01230,ko02010
mws0219	132.03	88	133.038	C4H7NO4	[M-H]-	L-Aspartic Acid	56-84-8	537470	392030	433780	484450	454190	344270	453320	551190	742420	ko00220,ko00250,ko00260,ko00261,ko00270,ko00300,ko00340,ko00410,ko00460,ko00710,ko00760,ko00770,ko00970,ko01100,ko01110,ko01200,ko01210,ko01230,ko02010
Lmbn000198	133.01	71.01	134.022	C4H6O5	[M-H]-	3-Dehydro-L-Threonic Acid	-	72824000	75476000	72920000	82761000	76044000	74437000	76272000	78918000	75611000	ko00053,ko01100
mws0275	133.01	71	134.022	C4H6O5	[M-H]-	L-(-)-Malic acid	97-67-6	3071700	3290200	3035400	3113300	2784000	2856600	2865600	3017300	2940200	ko00020,ko00620,ko00630,ko00710,ko01100,ko01110,ko01200
Zmgn000503	133.05	71.01	134.058	C5H10O4	[M-H]-	2,3-Dihydroxy-3-Methylbutanoic Acid	1756-18-9	11413000	20138000	16921000	22824000	17476000	11052000	12607000	22793000	17758000	--
pme0057	136.04	118.1	135.035	C4H9NO2S	[M+H]+	L-Homocysteine	6027-13-0	211230	219660	275020	294270	236040	206190	290340	169420	235410	ko00270,ko00920,ko01100,ko01110,ko01230
pme0040	136.06	119	135.054	C5H5N5	[M+H]+	Adenine	73-24-5	17653000	11857000	12934000	11500000	13020000	11957000	9807500	9510200	11526000	ko00230,ko00908,ko01100
HJKP000649	136.07	91.05	135.068	C8H9NO	[M+H]+	N-benzylformamide	6343-54-0	1045200	1079400	1170900	766880	1165200	904260	1053800	962060	1520500	--
mws0889	135.03	75.01	136.037	C4H8O5	[M-H]-	D-Threonic Acid	3909-12-4	1343400	1153800	1236900	1045200	1196500	1193200	1215900	1358000	1426800	--
pme0033	137.05	119	136.039	C5H4N4O	[M+H]+	Hypoxanthine	68-94-0	73984	72744	56688	61611	63205	73623	43469	42675	42844	ko00230,ko01100
pme2268	138.05	94.07	137.048	C7H7NO2	[M+H]+	Trigonelline	535-83-1	151160	267610	176200	222590	250560	126140	909560	210740	513490	ko00760
pme1002	138.09	103	137.084	C8H11NO	[M+H]+	L-Tyramine	51-67-2	2931900	3773900	3633900	4369900	3634300	3635100	3303800	2801500	3778700	ko00350,ko00950,ko01100,ko01110
Lmgn001670	137.03	108.02	138.032	C7H6O3	[M-H]-	Salicylic acid	69-72-7	461470	317910	366160	382260	366400	385930	359700	439110	326180	ko00360,ko01100,ko01110,ko04075
Lmbn002862	137.02	93.03	138.032	C7H6O3	[M-H]-	3-Hydroxybenzoic Acid*	99-06-9	111050	78868	105050	126770	156590	151610	112880	131930	145310	ko00400
Hmgn001653	137.02	93.04	138.032	C7H6O3	[M-H]-	Protocatechuic aldehyde	139-85-5	229470	200840	173290	201100	199910	199780	195690	191200	161010	ko00950
Lmbn001981	137.02	93.03	138.032	C7H6O3	[M-H]-	2,5-Dihydroxybenzaldehyde	1194-98-5	323050	248490	252470	261230	293620	278390	265070	235790	258360	ko00350,ko01100
mws2368	137.06	119.05	138.068	C8H10O2	[M-H]-	Tyrosol	501-94-0	51639	43700	40430	49508	46926	50397	40951	44939	40383	ko00350,ko01100
Hmcp000220	142.12	84.08	141.116	C8H15NO	[M+H]+	Isopelletierine	-	156420000	145600000	131510000	135040000	133150000	149890000	131850000	140370000	141710000	--
pme3207	141.02	59	142.027	C6H6O4	[M-H]-	Muconic acid	1119-72-8	2519200	2903600	1977200	3016300	3179700	3952100	2902900	2677000	2788500	ko01100
pmb0764	144.05	113.2	143.04	C6H9NOS	[M+H]+	4-Methyl-5-thiazoleethanol	137-00-8	153440	140030	95483	102820	140470	106030	103390	113070	108900	ko00730,ko01100
pmp000966	144.1	84.1	143.095	C7H13NO2	[M+H]+	Stachydrine	471-87-4	1835300	2780000	1868000	3196500	2488200	2875300	3043000	3269300	3606600	--
Rfmb320	144.1	84.08	143.095	C7H13NO2	[M+H]+	1-Methylpiperidine-2-carboxylic acid	7730-87-2	3510300	3089500	2987000	4119200	4005100	3650500	3908800	3879600	4391000	--
Rfmb318	144.1	84.08	144.092	C7H14NO2+	[M]+	D-Proline betaine	1195-94-4	1740500	1515000	1310400	1887300	1799900	1813500	1923700	1658400	2095000	--
pme0295	146.08	86	145.074	C6H11NO3	[M+H]+	4-Acetamidobutyric acid	3025-96-5	139450	103270	102320	109830	131290	112190	105850	74476	122560	ko00330,ko01100
mws0567	146.09	87	145.085	C5H11N3O2	[M+H]+	4-Guanidinobutyric acid	463-00-3	76527000	92240000	90261000	88041000	82992000	92543000	88074000	86960000	88579000	ko00330,ko01100
Lmgn000224	145.01	57.03	146.022	C5H6O5	[M-H]-	(S)-2-methyl-3-oxosuccinic acid	-	99241	97346	126360	125010	127930	151930	137680	108680	120720	ko00660
pme2380	145.01	101	146.022	C5H6O5	[M-H]-	α-Ketoglutaric acid	328-50-7	691660	869900	806090	1164000	1323900	1318000	1077600	1010200	1052500	ko00020,ko00040,ko00053,ko00220,ko00250,ko00300,ko00310,ko00340,ko00430,ko00630,ko00650,ko00660,ko01100,ko01110,ko01200,ko01210,ko01230
mws0208	145.05	101	146.058	C6H10O4	[M-H]-	Adipic Acid	124-04-9	431740	542380	1061000	282490	337050	300350	1054100	597720	964690	ko01100
Wmzn000227	145.06	109.04	146.058	C6H10O4	[M-H]-	2,2-Dimethylsuccinic acid	597-43-3	10540	8294.7	5973.4	4346.2	6976.2	5019.3	7935.7	7932.9	18925	--
mws0924	145.05	101	146.058	C6H10O4	[M-H]-	2-Methylglutaric acid	617-62-9	337570	420170	813820	236530	264030	229300	929310	450640	750180	--
pme0193	147.08	84	146.069	C5H10N2O3	[M+H]+	L-Glutamine	56-85-9	1699100	1329200	1715200	1165200	1799000	1157600	1918200	1469700	2421000	ko00220,ko00230,ko00240,ko00250,ko00630,ko00910,ko00970,ko01100,ko01230,ko02010
pme0026	147.11	84	146.106	C6H14N2O2	[M+H]+	L-Lysine	56-87-1	1833800	1430400	1847000	1262600	1968400	1209400	1992400	1640900	2582400	ko00300,ko00310,ko00780,ko00960,ko00970,ko01100,ko01110,ko01210,ko01230,ko02010
Zmzn000113	146.05	102.06	147.053	C5H9NO4	[M-H]-	L-threo-3-Methylaspartate	6061-13-8	250280	202070	217960	215650	192910	169600	235610	250380	247330	ko00630,ko00660,ko01100,ko01200
pme0014	148.06	84	147.053	C5H9NO4	[M+H]+	L-Glutamic acid	56-86-0	3017700	3015600	2466100	1896700	2070700	2350400	2011900	2314500	2646400	ko00220,ko00250,ko00330,ko00332,ko00340,ko00430,ko00480,ko00630,ko00650,ko00660,ko00860,ko00910,ko00970,ko01100,ko01110,ko01200,ko01210,ko01230,ko02010
mws1050	148.06	88	147.053	C5H9NO4	[M+H]+	O-Acetylserine	5147-00-2	271550	473680	395860	385750	371180	422670	333720	352450	355530	ko00270,ko00908,ko00920,ko01100,ko01110,ko01200,ko01230,ko04122
pmp001285	149.02	65.04	148.016	C8H4O3	[M+H]+	Phthalic anhydride	85-44-9	2326000	2280900	2952300	2428200	2540200	2741400	2421600	2429700	2722400	--
pmb2826	147.03	87.1	148.037	C5H8O5	[M-H]-	L-Citramalic acid*	6236-09-5	478030	587780	665220	660140	645140	507240	342950	691570	685460	ko00660,ko01100
Lmbn000216	147.03	57.03	148.037	C5H8O5	[M-H]-	(2R,3S)-3-methylmalic acid*	152204-30-3	486760	560630	512040	717760	404460	485660	650610	560990	470160	ko00290,ko00660,ko01100,ko01210,ko01230
Zmyn000247	147.03	57.03	148.037	C5H8O5	[M-H]-	(S)-2-Hydroxyglutaric Acid	13095-48-2	852250	833140	1001200	905480	591830	689980	832990	891460	834180	ko00310,ko01100
ML10171848	147.03	85.03	148.037	C5H8O5	[M-H]-	D-Arabinono-1,4-lactone	2782-09-4	307580	281590	335060	297670	332240	343620	375330	342420	353330	--
mws2213	147.05	77.01	148.052	C9H8O2	[M-H]-	Cinnamic acid	140-10-3	16960	16721	9502.8	7651.6	11088	5685.6	12195	9116.7	15116	ko00130,ko00360,ko00940,ko00998,ko01100,ko01110
pme3154	147.07	59.01	148.074	C6H12O4	[M-H]-	Mevalonic acid	150-97-0	508950	518050	573150	783600	704240	408870	306100	440340	479710	ko00900,ko01100,ko01110
pme1210	150.06	61	149.051	C5H11NO2S	[M+H]+	L-Methionine	63-68-3	397020	491250	593840	419500	453620	470520	516490	534480	654390	ko00270,ko00966,ko00970,ko01100,ko01110,ko01210,ko01230
mws0847	150.08	133	149.07	C6H7N5	[M+H]+	1-Methyladenine	5142-22-3	24483	40881	50017	41742	39604	24052	36810	31221	25670	--
mws0262	149.01	87	150.016	C4H6O6	[M-H]-	L-Tartaric acid	87-69-4	20110	18702	48115	32186	30220	17642	31088	37059	29694	ko00630,ko01100
Zmgn000173	149.05	75.01	150.053	C5H10O5	[M-H]-	D-Ribose	50-69-1	171810	113260	170910	138360	140090	109450	181430	173610	184000	ko00030,ko01100,ko02010
mws1499	149.05	59.01	150.053	C5H10O5	[M-H]-	D-(-)-Arabinose	10323-20-3	121590	97012	80361	115880	103390	103940	129360	127370	106700	--
mws0921	149.06	131	150.068	C9H10O2	[M-H]-	p-Coumaryl alcohol	3690-05-9	5348.6	9	4402.9	9	9	3434.1	9	6543.6	6050.2	ko00940,ko01100,ko01110
pme0183	152.06	135	151.049	C5H5N5O	[M+H]+	Isoguanine*	3373-53-3	469900	494480	626000	699720	981280	767240	402340	431300	623940	--
pme1109	152.06	135	151.049	C5H5N5O	[M+H]+	Guanine*	73-40-5	54951	68702	101640	101890	129780	93336	108170	87406	103650	ko00230,ko01100
pme0256	151.03	151	152.033	C5H4N4O2	[M-H]-	Xanthine	69-89-6	90878	53113	46476	58865	68654	119710	85818	62537	52692	ko00230,ko00232,ko01100,ko01110
mws0458	151.04	136	152.047	C8H8O3	[M-H]-	Vanillin	121-33-5	5140600	4363000	4807700	4782400	5467000	4742600	4645000	4633400	4526800	ko00998,ko01100,ko01110
pme0513	151.06	59	152.068	C5H12O5	[M-H]-	Xylitol	87-99-0	31564	30202	34761	32745	33392	19023	25373	33574	27917	ko00040,ko01100,ko02010
mws0437	151.06	71	152.068	C5H12O5	[M-H]-	D-Arabitol	488-82-4	24791	29131	30713	36461	28037	32341	30504	26591	38323	ko00040,ko01100
mws0444	152.04	108	153.043	C7H7NO3	[M-H]-	3-Aminosalicylic acid	570-23-0	26159	5330.4	11257	10157	8890.2	10673	9534.8	10609	16020	--
mws0885	153.02	109.03	154.027	C7H6O4	[M-H]-	2,4-Dihydroxybenzoic acid*	89-86-1	73117	42598	41667	21591	93078	20234	62415	67937	60558	--
mws0180	153.02	109.03	154.027	C7H6O4	[M-H]-	2,5-Dihydroxybenzoic acid*	490-79-9	59567	19980	22870	34901	27660	33276	27627	34696	18959	ko00350,ko01100
pmb3099	153.03	125	154.039	C4H11O4P	[M-H]-	Diethyl phosphate	598-02-7	7871.9	4622.8	10281	4247.6	9599.6	8537.5	11188	8269.7	23962	--
mws0254	156.08	110	155.069	C6H9N3O2	[M+H]+	L-Histidine	71-00-1	177530	147760	229230	256580	253890	140000	230170	248590	353130	ko00340,ko00410,ko00970,ko01100,ko01110,ko01230,ko02010
pmp001196	160.1	98.1	159.09	C7H13NO3	[M+H]+	Calystegine A3	131580-36-4	9897100	10432000	10102000	9176900	11266000	8343800	13405000	11751000	14590000	ko00960
pme2589	159.1	87	160.037	C6H8O5	[M-H]-	2-Oxoadipic acid	3184-35-8	46900	65534	70588	64903	64428	53658	77075	63240	55144	ko00300,ko00310,ko00380,ko01100,ko01110,ko01210,ko01230
Lmbn002072	159.07	97.07	160.074	C7H12O4	[M-H]-	2-Propylsuccinic acid	618-57-5	64164	53033	52967	75997	85486	80931	66043	68129	66643	--
pme3382	160.06	98	161.069	C6H11NO4	[M-H]-	N-Acetyl-L-threonine	17093-74-2	19226	21150	18084	24651	21209	17149	28572	21743	26814	--
pmp001201	162.11	79.1	161.105	C7H15NO3	[M+H]+	5-Aminocycloheptane-1,2,3-triol	-	258700	246420	214640	252460	262780	196860	299910	264690	342470	--
pmf0440	163.08	91.1	162.068	C10H10O2	[M+H]+	4-MethoxycinnaMaldehyde	1963-36-6	306670	255580	314850	177920	311810	246680	334330	251060	542250	--
mws1478	163.12	130	162.116	C10H14N2	[M+H]+	Nicotine	54-11-5	16641	43572	59953	46385	57391	45715	44504	31653	31798	ko00960,ko01110
Lmbp000123	164.07	56.05	163.067	C6H13NO2S	[M+H]+	L-Homomethionine	25148-30-5	436130	239450	681540	469190	810210	312860	617110	689820	1125000	ko00966,ko01110,ko01210
pme1419	164.07	104	163.067	C6H13NO2S	[M+H]+	L-Methionine methyl ester	10332-17-9	16710	20461	21520	24307	16942	15461	20832	14595	18258	--
mws1641	165.04	120.02	164.033	C6H4N4O2	[M+H]+	Lumazine	487-21-8	29247	25343	39517	32281	33530	36539	23868	19810	18646	--
Lmbn002648	163.04	119.05	164.047	C9H8O3	[M-H]-	α-Hydroxycinnamic Acid	5801-57-0	611680	292460	262690	310510	496560	463560	266250	195190	250240	ko00360,ko01100
mws0159	163.04	91	164.047	C9H8O3	[M-H]-	Phenylpyruvic acid	156-06-9	38133	231870	263290	305410	169020	342470	254610	173760	294180	ko00360,ko00400,ko00960,ko01100,ko01110,ko01210,ko01230
pmb0142	165.1	95.2	164.047	C9H8O3	[M+H]+	Caffeic aldehyde	141632-15-7	8605.1	10239	16743	17056	13317	19001	15090	11542	13634	ko00940,ko01110
pme1439	165.05	119	164.047	C9H8O3	[M+H]+	p-Coumaric acid	501-98-4	88603	68928	57214	90286	99013	90158	43586	56498	44740	ko00130,ko00350,ko00940,ko00950,ko00998,ko01100,ko01110
pme3083	164.04	120	165.043	C8H7NO3	[M-H]-	2-(Formylamino)benzoic acid	3342-77-6	64103	30297	38873	41532	58815	49963	36606	26923	38262	ko00380,ko01100
pme2617	166.05	102	165.046	C5H11NO3S	[M+H]+	L-Methionine Sulfoxide	3226-65-1	2003100	1901100	1828700	1708500	1793800	1534700	1700600	1661000	1880900	ko00270
pme3968	166.07	149.05	165.065	C6H7N5O	[M+H]+	7-Methylguanine	578-76-7	22180	19750	22455	19172	23857	15839	21527	16821	20490	--
pme0021	166.09	120.08	165.07	C9H11NO2	[M+H]+	L-Phenylalanine	63-91-2	86620000	82143000	79114000	78493000	83849000	76523000	81956000	80536000	86801000	ko00360,ko00400,ko00460,ko00940,ko00960,ko00966,ko00970,ko00998,ko01100,ko01110,ko01210,ko01230,ko02010
pme0281	165.02	121.03	166.027	C8H6O4	[M-H]-	Terephthalic acid*	100-21-0	3103400	3360000	3272100	3064600	3956900	3689800	3439200	3339500	4433100	ko01100
pme0282	165.02	77.04	166.027	C8H6O4	[M-H]-	Phthalic acid*	88-99-3	48180	63887	63925	81359	77617	62267	69579	93074	74760	ko01100,ko02010
mws0344	165.04	75	166.048	C5H10O6	[M-H]-	D-Xylonic acid	526-91-0	300960	423920	496140	496950	474460	191220	404340	419110	470760	ko00040,ko01100
mws0851	143.11	143.11	166.097	C8H15NaO2	[M-Na]-	Sodium Valproate	1069-66-5	1643100	1580500	1687300	1386400	1808400	2171400	2537700	1210900	3084000	--
pmc0274	167.1	121.1	166.1	C6H6N4S	[M+H]+	6-Methylmercaptopurine	50-66-8	13569000	11881000	10865000	11084000	13156000	10448000	12047000	12305000	15487000	--
Zmjp000624	168.06	150.05	167.058	C8H9NO3	[M+H]+	Pyridoxal	66-72-8	312260	315330	359640	302610	293230	276950	317150	332270	327360	ko00750,ko01100
NK10253223	168.06	94.06	167.058	C8H9NO3	[M+H]+	2-Amino-3-methoxybenzoic acid	3177-80-8	290190	295580	348250	303480	282270	256340	282620	311030	335350	ko00380
pmp001073	168.1	150.09	167.095	C9H13NO2	[M+H]+	Synephrine; 4-[1-Hydroxy-2-(methylamino)ethyl]phenol	94-07-5	1196300	1139200	1307200	1028700	1080300	1117600	1159400	1170200	1141400	--
mws2125	166.98	78.7	167.982	C3H5O6P	[M-H]-	Phosphoenolpyruvate	138-08-9	70771	107650	104190	81189	134460	119420	136110	140110	149270	ko00010,ko00020,ko00400,ko00440,ko00620,ko00710,ko00998,ko01100,ko01110,ko01200,ko01230
Zmsp001834	169.05	65	168.042	C8H8O4	[M+H]+	2,6-Dimethoxy-1,4-benzoquinone	530-55-2	8399800	9304200	9268300	9969400	8523700	8260600	9341900	7976500	8017600	--
pme1292	167.1	123.04	168.042	C8H8O4	[M-H]-	Homogentisic acid	451-13-8	58722	55301	61663	81897	85343	82855	100140	43253	69706	ko00130,ko00350,ko01100
pme1383	170.08	134.1	169.074	C8H11NO3	[M+H]+	Pyridoxine	65-23-6	475830	477060	490280	416810	527020	424190	437980	444130	507480	ko00750,ko01100
pme0181	170.09	124	169.085	C7H11N3O2	[M+H]+	3-Methyl-L-Histidine	368-16-1	109640	126960	132590	146300	105960	121580	113350	92644	89855	ko00340,ko01100
Zmzn000078	168.99	78.96	169.998	C3H7O6P	[M-H]-	Dihydroxyacetone phosphate	57-04-5	37470	67023	56307	89404	67139	63316	62418	59939	58725	ko00010,ko00040,ko00051,ko00052,ko00561,ko00562,ko00564,ko00640,ko00710,ko00760,ko01100,ko01110,ko01200,ko01230
pme3186	169	79	169.998	C3H7O6P	[M-H]-	DL-Glyceraldehyde-3-phosphate	591-59-3	8107.9	60916	59048	61118	52330	48744	44246	62593	71897	--
pme0253	174.11	86	173.105	C8H15NO3	[M+H]+	N-Acetyl-L-leucine	1188-21-2	10472	2571	7408	5915.8	10416	2598.8	2224.5	5588	9700.2	--
pme2550	173.02	137	174.016	C6H6O6	[M-H]-	Cis-Aconitic acid*	585-84-2	125750	91590	142600	82967	78346	87749	134480	126990	112270	ko00020,ko00630,ko00660,ko01100,ko01110,ko01210
mws0154	173.05	93	174.053	C7H10O5	[M-H]-	Shikimic acid	138-59-0	315410	338640	318420	274580	215160	296140	330330	262350	303580	ko00400,ko01100,ko01110,ko01230
mws0242	173.08	111	174.089	C8H14O4	[M-H]-	Suberic Acid	505-48-6	77244	35252	47820	76318	76185	74310	50002	49384	41011	--
mws1401	175.11	84	174.1	C7H14N2O3	[M+H]+	L-Theanine	3081-61-6	1581000	1714200	1709300	1689600	1834400	1743200	1574100	1701000	1833800	--
Zmyn000155	173.11	131.08	174.1	C7H14N2O3	[M-H]-	N-α-Acetyl-L-ornithine	6205-08-9	22103	25464	14810	9925.1	14222	13968	17537	15580	27349	ko00220,ko01100,ko01110,ko01210,ko01230
pme2559	174.04	88	175.048	C6H9NO5	[M-H]-	N-Acetyl-L-Aspartic Acid	997-55-7	207520	117430	344760	334230	259080	250310	528940	203870	391000	ko00250,ko01100
pmp001194	176.09	158.1	175.084	C7H13NO4	[M+H]+	Calystegine B2	127414-85-1	3261500	3643900	3352700	2916500	3978300	2802400	4375900	3827900	4654600	--
pmp001195	176.09	140.1	175.084	C7H13NO4	[M+H]+	Calystegine B1	127414-86-2	9813600	10850000	10118000	8506600	11762000	8212500	12916000	10455000	13328000	--
pme0008	176.1	113	175.096	C6H13N3O3	[M+H]+	L-Citrulline	372-75-8	1325300	1390100	1362800	1114000	1660200	1109600	1685000	1656400	2066400	ko00220,ko01100,ko01110,ko01230
Hmfn00531	175.02	87.01	176.032	C6H8O6	[M-H]-	L-Ascorbic acid	50-81-7	22906	29582	28113	22885	36670	22441	33071	24812	37561	ko00053,ko00480,ko01100,ko01110
Lmbn001754	175.06	115.04	176.068	C7H12O5	[M-H]-	3-Isopropylmalic Acid*	921-28-8	3355500	2200700	2534500	7766500	4063700	7483600	2564800	15986000	1339800	ko00290,ko01100,ko01110,ko01210,ko01230
Zmgn001448	175.06	115.04	176.068	C7H12O5	[M-H]-	2-Propylmalic Acid*	-	3380700	2653300	2969800	9636200	4535500	8639100	2830000	16660000	1566000	ko00620
pmb3101	175.06	115	176.068	C7H12O5	[M-H]-	2-Isopropylmalic Acid*	49601-06-1	4378000	3497600	3887600	10797000	5434800	11006000	3799600	19011000	1953900	ko00290,ko00620,ko01100,ko01110,ko01210,ko01230
pme1021	177.14	99	178.048	C6H10O6	[M-H]-	D-Glucono-1,5-lactone	90-80-2	27345	35002	14180	29259	34442	26662	23966	41192	26569	ko00030,ko01100,ko01110,ko01200
mws1195	179.07	147.1	178.063	C10H10O3	[M+H]+	p-Coumaric acid methyl ester	3943-97-3	655320	652630	923380	831670	1044300	771660	693210	619030	736100	--
mws0009	179.07	91	178.063	C10H10O3	[M+H]+	Coniferaldehyde	20649-42-7	64679	56091	64494	52820	53294	44953	46802	46923	57727	ko00940,ko01100,ko01110
mws2212	179.03	135.05	180.042	C9H8O4	[M-H]-	Caffeic acid	331-39-5	237730	120400	137800	162630	138880	171220	182340	173950	139530	ko00940,ko01100,ko01110
mws4170	179.06	59.01	180.063	C6H12O6	[M-H]-	D-Glucose*	14431-43-7	6906200	5346200	4699300	7530400	7124100	6190500	6952100	7540800	6569900	ko00010,ko00030,ko00052,ko00500,ko00520,ko00901,ko01100,ko01110,ko02010,ko04933
mws1164	179.06	87	180.063	C6H12O6	[M-H]-	D-Fructose*	7660-25-5	1472800	1369200	1328600	1012600	1237700	908310	1723500	1512300	1760700	--
pme0516	179.06	87	180.063	C6H12O6	[M-H]-	Inositol*	87-89-8	1229700	1121300	1142100	815450	1101800	754460	1405000	1371300	1369100	ko00052,ko00053,ko00562,ko01100,ko01110,ko02010,ko04070
mws0093	179.07	146	180.079	C10H12O3	[M-H]-	Coniferyl alcohol	458-35-5	9405.9	18151	26880	22632	12747	16746	19515	24403	20981	ko00940,ko00998,ko01100,ko01110
Cmyp007180	181.12	107.09	180.115	C11H16O2	[M+H]+	Dihydroactinidiolide	17092-92-1	76977	93232	133760	134580	103110	157150	125810	84754	88845	--
mws0250	182.08	136.1	181.074	C9H11NO3	[M+H]+	L-Tyrosine	60-18-4	18298000	19184000	19486000	14018000	19982000	14938000	19715000	17426000	25344000	ko00130,ko00261,ko00350,ko00360,ko00400,ko00460,ko00730,ko00940,ko00950,ko00965,ko00966,ko00970,ko00998,ko01100,ko01110,ko01210,ko01230
mws1350	181.05	151	182.058	C9H10O4	[M-H]-	Syringaldehyde; 4-Hydroxy-3,5-Dimethoxybenzaldehyde	134-96-3	595450	698310	646670	665670	628250	623890	529230	564160	492110	--
mws0214	181.07	71	182.079	C6H14O6	[M-H]-	D-Sorbitol	50-70-4	36558	43006	31236	66637	48526	35377	48963	48450	44964	ko00051,ko00052,ko01100,ko02010
mws1155	181.07	101.02	182.079	C6H14O6	[M-H]-	Mannitol	69-65-8	5966	4291.4	9	10370	9	4603.1	8224.8	4573.2	10518	ko00051,ko01100,ko02010
pme2237	181.07	101	182.079	C6H14O6	[M-H]-	Dulcitol	608-66-2	19812	13995	16651	42120	16765	20673	19384	19159	14632	ko00052,ko01100
pme2596	184.06	148	183.053	C8H9NO4	[M+H]+	4-Pyridoxic acid	82-82-6	54105	55126	76432	44811	53964	57939	55775	60375	57167	ko00750,ko01100
Zmgn000447	184.98	78.96	185.993	C3H7O7P	[M-H]-	3-Phospho-D-glyceric acid	820-11-1	738690	652710	509190	598440	988670	621090	691030	623970	836430	ko00010,ko00030,ko00260,ko00270,ko00561,ko00630,ko00710,ko01100,ko01110,ko01200,ko01230
mws0752	185.15	185.16	186.162	C11H22O2	[M-H]-	Undecylic Acid	112-37-8	528330	452780	655410	506880	616840	616630	697020	545970	1251800	--
Hmmp001310	188.07	118.07	187.063	C11H9NO2	[M+H]+	3-Indoleacrylic acid	1204-06-4	16309000	18309000	17162000	11740000	21103000	12155000	18831000	14527000	23211000	--
pmn001492	187.1	123.1	188.041	C11H8O3	[M-H]-	Ayapin	494-56-4	385240	87581	169420	239330	270340	188250	108510	134730	125290	--
pme0137	187.07	125	188.08	C7H12N2O4	[M-H]-	N-Acetyl-L-Glutamine	2490-97-3	59453	107700	117310	77965	66996	125380	139480	117900	97561	--
pmn001380	187.1	169.09	188.105	C9H16O4	[M-H]-	Eucommiol	55930-44-4	955820	234440	361100	650740	704890	591840	290580	422950	385390	--
mws0237	187.1	125	188.105	C9H16O4	[M-H]-	Anchoic Acid	123-99-9	5898600	1518500	2334500	4146700	4865400	3501800	1682600	2636700	2392600	--
pme0122	189.12	126	188.116	C8H16N2O3	[M+H]+	N6-Acetyl-L-lysine	692-04-6	394800	387580	360190	340770	490840	406070	360250	308230	389280	ko00310,ko01100
pme3388	189.13	144	188.127	C7H16N4O2	[M+H]+	Homoarginine	156-86-5	35197	29120	37753	24314	40876	23254	40824	33964	47021	--
Zmjp000182	189.13	70.07	188.127	C7H16N4O2	[M+H]+	N-Monomethyl-L-arginine	17035-90-4	671840	599330	666730	438570	534610	476660	586180	620560	734210	--
pme0075	188.06	128	189.064	C7H11NO5	[M-H]-	N-Acetyl-L-glutamic acid	1188-37-0	126130	107970	88682	107270	96839	162050	159400	115080	106910	ko00220,ko01100,ko01110,ko01210,ko01230
pme2244	190.09	118.07	189.07	C11H11NO2	[M+H]+	3-Indolepropionic acid	830-96-6	13946	11793	14092	5540.6	23348	13066	15724	12490	19763	--
mws0193	190.12	127	189.111	C7H15N3O3	[M+H]+	L-Homocitrulline	1190-49-4	103900	79956	81698	72985	112470	124600	76711	83494	85119	--
pme0278	191.1	128	190.095	C7H14N2O4	[M+H]+	2,6-Diaminooimelic acid	583-93-7	13497	18777	19457	14501	28093	22815	18138	14154	15881	ko00300,ko01100,ko01110,ko01230
Zmyn000453	191.02	111.01	192.027	C6H8O7	[M-H]-	Isocitric Acid	320-77-4	7138800	7854600	8155700	7752800	6970300	7455600	6653400	6945400	6590800	ko00020,ko00630,ko01100,ko01110,ko01200,ko01210,ko01230
Hmjp002337	193.04	133.03	192.033	C10H8O4	[M+H]+	Isoscopoletin (6-Hydroxy-7-Methoxycoumarin)	776-86-3	29220	32894	163270	83597	18824	68529	70893	28073	124580	--
mws0277	191.06	85	192.063	C7H12O6	[M-H]-	Quinic Acid	77-95-2	455890	506040	559290	528280	421920	465810	402900	429140	450030	ko00400,ko01100
mws1189	193.04	72.8	194.033	C6H10O7	[M-H]-	D-Galacturonic acid	685-73-4	103750	75717	101260	122830	114830	99963	104250	130830	200370	ko00040,ko00053,ko00520,ko01100,ko02010
pme3705	193.04	73	194.043	C6H10O7	[M-H]-	D-Glucoronic acid	6556-12-3	205640	168680	212930	195120	226970	245410	239680	189470	284850	ko00040,ko00053,ko00520,ko00562,ko01100
Lmdn003756	193.05	135.05	194.058	C10H10O4	[M-H]-	Methyl caffeate	3843-74-1	19686	9882	8269.3	13354	13009	12809	13483	13499	9217.1	--
mws0014	193.05	134.01	194.058	C10H10O4	[M-H]-	Ferulic acid	537-98-4	2334100	516670	491360	655720	718860	625230	448290	443950	375060	ko00940,ko01100,ko01110
pme0534	195.05	74.9	196.058	C6H12O7	[M-H]-	Gluconic acid	526-95-4	1078100	915110	936800	1081400	1009800	993120	1098600	975500	1092000	ko00030,ko01100,ko01110,ko01200
pme3827	198.08	152.2	197.069	C9H11NO4	[M+H]+	3,4-Dihydroxy-L-phenylalanine	59-92-7	2451900	1591500	2255200	2192400	1480200	1572300	1857800	2196100	1535400	ko00350,ko00950,ko00965,ko01100,ko01110
Zmzn000079	199	78.96	200.009	C4H9O7P	[M-H]-	D-Erythrose-4-phosphate	585-18-2	620620	194490	193930	346200	211110	162460	216360	202130	216540	ko00030,ko00400,ko00710,ko00750,ko00998,ko01100,ko01110,ko01200,ko01230
pmb2640	199.17	181	200.178	C12H24O2	[M-H]-	Lauric acid	143-07-7	8355.2	7695.4	11798	24077	26311	23512	14759	9535.6	16277	ko00061,ko01100,ko01110
mws5037	203.14	86.1	202.132	C9H18N2O3	[M+H]+	L-Alanyl-L-leucine	3303-34-2	23863	26966	22511	34270	16328	17530	20099	25404	28528	--
NK10251888	203.15	70.07	202.143	C8H18N4O2	[M+H]+	NG,NG-Dimethyl-L-arginine	30315-93-6	1193500	1234600	1394500	1222000	1686500	1142800	1455700	1176400	1710200	--
mws0018	203.22	83	202.216	C10H26N4	[M+H]+	Spermine	71-44-3	85833000	76739000	88700000	84042000	83853000	77275000	80096000	62545000	73866000	ko00330,ko00410,ko00480,ko01100
Wmhn001652	203.08	116.05	204.042	C11H8O4	[M-H]-	3-Methoxy-juglone	-	10714000	10462000	10661000	7985600	12611000	8115000	12548000	10280000	15139000	--
mws0282	203.08	116.05	204.09	C11H12N2O2	[M-H]-	L-Tryptophan	73-22-3	13646000	14051000	13293000	10460000	16446000	10551000	16174000	13284000	18951000	ko00260,ko00380,ko00400,ko00901,ko00966,ko00970,ko00998,ko01100,ko01110,ko01210,ko01230
Lmln010063	205.16	189.13	206.167	C14H22O	[M-H]-	2,6-Di-t-butylphenol	128-39-2	2485100	2550500	3293300	2067600	3150100	2669600	2996900	2576600	4742200	--
Zmgn002106	206.08	58.03	207.09	C11H13NO3	[M-H]-	N-Acetyl-L-phenylalanine	2018-61-3	244720	283480	365360	355740	255670	271630	330520	261320	302440	ko00360,ko01100
pme3443	207.07	192	208.074	C11H12O4	[M-H]-	Sinapinaldehyde	4206-58-0	333650	484320	314580	265940	272190	308300	395390	426110	506290	ko00940,ko01100,ko01110
mws1212	209.08	177.3	208.074	C11H12O4	[M+H]+	Methyl ferulate	2309-07-1	15340000	14912000	18076000	13199000	17766000	12963000	15249000	15390000	15685000	--
pmb2620	207.07	133.1	208.074	C11H12O4	[M-H]-	3,4-Dimethoxycinnamic acid	14737-89-4	7540200	7316900	9816000	6790900	9308300	7323100	7957700	8292400	8504900	--
Zmyn000108	209.03	85.03	210.038	C6H10O8	[M-H]-	D-Saccharic acid	87-73-0	235920	211820	264380	264650	265420	178940	277230	235960	273110	ko00053,ko01100
Zmpn000199	209.03	85.03	210.038	C6H10O8	[M-H]-	D-Galactaric acid	526-99-8	139710	227360	178630	284830	233410	210090	225710	171730	224990	ko00053,ko01100
Hmcn000192	209.07	59.01	210.073	C7H14O7	[M-H]-	Sedoheptulose	3019-74-7	157780	157370	169600	193260	166010	184890	166650	161850	152720	ko00710,ko01100
pme1654	209.12	59.02	210.126	C12H18O3	[M-H]-	Jasmonic acid	77026-92-7	30472	48710	161960	225980	155830	224280	64830	120060	268650	ko00592,ko01100,ko01110,ko04075
mws0863	213.02	97	214.024	C5H11O7P	[M-H]-	2-Deoxyribose-5'-phosphate*	102916-66-5	17589	28943	19289	29780	29785	30600	21448	26615	30811	ko00030,ko01100
pmb2507	213.1	97	214.024	C5H11O7P	[M-H]-	2-Deoxyribose-1-phosphate*	17210-42-3	1354100	1318300	863360	881430	2045800	1241500	1413000	1381000	2151200	ko00030,ko00240,ko01100
Hmln002597	193.05	161.02	216.04	C10H9NaO4	[M-Na]-	Sodium ferulate	24276-84-4	3945600	2654300	2847700	3056900	2357000	2999800	2985500	3474200	2815500	--
pme2566	217.08	199	218.09	C8H14N2O5	[M-H]-	(5-L-Glutamyl)-L-amino acid	5875-41-2	33182	39965	23018	39118	36409	27801	37616	42037	37396	ko00480,ko01100
mws1337	220.12	202.1	219.111	C9H17NO5	[M+H]+	D-Pantothenic Acid	79-83-4	4795300	5219500	5539500	5263500	4902400	5098800	4901800	4328200	4304500	ko00410,ko00770,ko01100,ko01110
mws2608	222.1	84.05	221.09	C8H15NO6	[M+H]+	N-Acetyl-D-galactosamine*	1811-31-0	3108000	3410100	3494500	3340600	2956000	3129200	2501500	2110100	1669700	ko00052,ko01100
mws4174	222.1	138	221.09	C8H15NO6	[M+H]+	N-Acetyl-D-mannosamine*	7772-94-3	80589	84593	70492	64479	76352	80349	50950	56041	54996	ko00520,ko01100
pme2755	222	144	221.09	C8H15NO6	[M+H]+	N-Acetyl-D-glucosamine*	7512-17-6	2270200	2530400	2750800	2957500	2466800	2999200	1681500	1320800	1428100	ko00520,ko01100,ko02010
mws5042	223.11	120.09	222.1	C11H14N2O3	[M+H]+	L-Glycyl-L-phenylalanine	721-66-4	119020	76065	87133	73060	70843	65896	87939	78533	85088	--
Lmlp000240	225.19	84.08	224.34	C13H24N2O	[M+H]+	Cuscohygrine	454-14-8	13016000	18686000	15006000	24909000	14860000	17436000	14752000	30406000	25632000	ko00960,ko01110
pmb2643	225.19	207	226.193	C14H26O2	[M-H]-	Myristoleic acid	544-64-9	3853.1	3053.4	5137.4	3181	2151.1	1313.8	3186.7	3307.3	3866.9	--
pme1194	228.1	112	227.091	C9H13N3O4	[M+H]+	2'-Deoxycytidine	951-77-9	92188	84219	73121	155650	182580	153020	80343	87224	115130	ko00240,ko01100,ko02010
mws0119	227.2	227.2	228.209	C14H28O2	[M-H]-	Myristic Acid	544-63-8	19382000	14665000	15886000	13368000	15275000	13109000	16244000	15403000	19183000	ko00061,ko01100
pma6455	229.01	96.97	230.02	C5H11O8P	[M-H]-	Ribulose-5-phosphate	4300-28-1	18850	28133	46887	31855	28498	31652	28321	38906	48630	ko00030,ko00230,ko00440,ko00710,ko01100,ko01110,ko01200,ko01230
mws0474	229.14	211	230.152	C12H22O4	[M-H]-	Dodecanedioic aicd	693-23-2	2065.8	1958.2	1243.8	1505.2	1342.2	899.98	1618.1	1677.6	1705.7	--
Lmhp001670	231.16	72.08	231.17	C11H22N2O3	[M+H]+	L-Valyl-L-Leucine	3989-97-7	72239	55342	70086	80573	122230	111580	59415	73790	61992	--
pmb0490	235.14	147.04	234.137	C13H18N2O2	[M+H]+	p-Coumaroylputrescine	34136-53-3	133220	142350	390750	121310	157690	124850	294020	141370	219940	ko00330,ko01100
ML10174588	233.16	233.16	234.162	C15H22O2	[M-H]-	Confertifoline	1811-23-0	4496700	4417400	5624700	3384600	4950900	4790500	4652900	3929500	8253700	--
mws4176	237.12	120.09	236.116	C12H16N2O3	[M+H]+	L-Alanyl-L-Phenylalanine	3061-90-3	25296	21123	31008	27455	36841	31098	20877	18695	13280	--
Lmhn003240	237.04	121.03	238.048	C11H10O6	[M-H]-	Benzoylmalic acid	22138-51-8	22868	24967	32733	37177	23221	32742	35498	30507	29752	--
pmn001669	237.08	147	238.084	C12H14O5	[M-H]-	Methyl sinapate	20733-94-2	33999	31380	26181	26423	16225	16984	35470	32738	36651	--
mws0221	241.03	152	240.024	C6H12N2O4S2	[M+H]+	L-Cystine	56-89-3	13871	13559	11420	6578.2	14598	11682	8308.8	12034	8770.8	ko00270,ko01100,ko02010
pme0264	243.1	127	242.09	C10H14N2O5	[M+H]+	Thymidine	50-89-5	160950	158050	146820	183600	206350	181300	181110	183540	183880	ko00240,ko01100
Zmyn005209	241.22	225.02	242.225	C15H30O2	[M-H]-	12-Methyltetradecanoic Acid	5502-94-3	55190	102700	116760	50856	68264	74771	85333	96841	212430	--
mws0359	241.22	241.22	242.225	C15H30O2	[M-H]-	Pentadecanoic Acid	1002-84-2	1887200	1242300	1378200	1388900	1233500	1377600	1231200	1240000	1111600	--
ML10180524	244.09	112.05	243.086	C9H13N3O5	[M+H]+	Cytarabine	147-94-4	771710	547300	674000	645620	645200	561010	511010	465750	515510	--
pme3732	244.09	112	243.086	C9H13N3O5	[M+H]+	Cytidine	65-46-3	584960	475500	478150	414410	593760	433580	358730	314460	325500	ko00240,ko01100,ko02010
mws0976	243.06	153	244.07	C9H12N2O6	[M-H]-	β-Pseudouridine	1445-07-4	100370	41953	46117	44214	41265	46697	56554	32961	40235	ko00240,ko01100
mws0248	243.06	110	244.07	C9H12N2O6	[M-H]-	Uridine	58-96-8	459810	235200	243610	288940	232750	304480	263660	233000	212180	ko00240,ko01100,ko02010
pme2266	245.1	227	244.088	C10H16N2O3S	[M+H]+	Biotin	58-85-5	39416	46314	47704	40122	53328	31338	35962	23983	43884	ko00780,ko01100,ko02010
Lmhp002031	245.18	86.1	245.186	C12H24N2O3	[M+H]+	L-Leucyl-L-Leucine	3303-31-9	42724	38973	50156	69378	77886	74812	31457	56326	49156	--
pmb2591	245.09	203.2	246.1	C13H14N2O3	[M-H]-	N-Acetyl-L-Tryptophan	1218-34-4	9	9	9	9	35459	9	9	9	9	--
pme3961	252.11	136	251.102	C10H13N5O3	[M+H]+	2'-Deoxyadenosine	958-09-8	99485	69251	67799	101800	72722	84308	61411	57632	55969	ko00230,ko01100,ko02010
mws0361	253.22	235.19	254.225	C16H30O2	[M-H]-	Palmitoleic Acid	373-49-9	20231	5301.1	8034.3	9	25358	18341	8949.1	21840	23704	ko00061
pma3101	256.2	124.1	256.082	C11H14NO6+	[M+H]+	Nicotinate D-ribonucleoside	17720-18-2	1428800	1431000	1590200	1261000	1527900	1431500	1368400	1174100	1289000	ko00760,ko01100
mws0120	258.11	104.11	257.103	C8H20NO6P	[M+H]+	Choline Alfoscerate	28319-77-9	8877900	2508000	1802800	1930000	3886100	1858600	2239900	1512300	2350300	ko00564,ko00565
pme1187	257.08	124	258.085	C10H14N2O6	[M-H]-	5-Methyluridine	1463-10-1	16340	10005	5949.9	11562	15065	8424.1	8455.4	7194.5	8618.8	--
Zmyn000110	258.04	78.96	259.046	C6H14NO8P	[M-H]-	D-Glucosamine 1-phosphate	2152-75-2	441020	116520	110100	129160	125470	102120	118960	88073	108700	ko00520,ko01100
mws1090	259.02	97	260.03	C6H13O9P	[M-H]-	Glucose-1-phosphate*	59-56-3	2143900	2394800	2337700	2420900	1839500	1430100	2521800	2194700	2611400	ko00010,ko00040,ko00052,ko00500,ko00520,ko00523,ko00561,ko01100,ko01110
pme3313	259	97	260.03	C6H13O9P	[M-H]-	D-Fructose 6-phosphate*	643-13-0	592920	904330	895890	710110	871430	609670	746000	897920	902350	ko00052,ko00500,ko00710,ko01100,ko01110,ko01200
mws0866	259.02	97	260.03	C6H13O9P	[M-H]-	D-Glucose 6-phosphate*	56-73-5	2081000	2342000	2607400	2518100	1910800	1735200	2523300	2414600	2752400	ko00500,ko00562,ko00998,ko01100,ko01110
Zmpn000095	261.04	78.96	262.045	C6H15O9P	[M-H]-	Sorbitol-6-phosphate	20479-58-7	91442	78438	63868	108200	78696	72067	65748	73782	67387	ko00051,ko01100
Lmtn004049	263.13	204.12	264.136	C15H20O4	[M-H]-	Abscisic acid	21293-29-8	8552.5	6326.2	9	17008	37233	21318	6533.7	7722.1	9107	ko00906,ko01100,ko01110,ko04075
Lmlp003161	265.15	177.06	264.147	C14H20N2O3	[M+H]+	N-Feruloylputrescine	501-13-3	18876000	13391000	19808000	13545000	15539000	13879000	21263000	15401000	18806000	ko00330,ko01100
Lmhp002001	265.15	72.08	265.155	C14H20N2O3	[M+H]+	L-Valyl-L-Phenylalanine	3918-92-1	524930	458280	761090	423430	492180	360290	619900	493710	518670	--
Lmmp002013	267.17	179.07	266.163	C14H22N2O3	[M+H]+	Dihydroferuloylputrescine	-	85397	64772	139750	96991	125070	64344	123080	147170	106610	--
Hmsn000210	133.01	115.01	266.224	C17H30O2	[M-H]-	Methyl 7,10-hexadecadienoate	-	8978100	13113000	12618000	13945000	13264000	12482000	12773000	14269000	13877000	--
pme1184	268.1	152	267.097	C10H13N5O4	[M+H]+	2'-Deoxyguanosine	961-07-9	262820	258940	251100	447520	571680	482850	289730	318290	356820	ko00230,ko01100,ko02010
pme0230	268.1	136.06	267.097	C10H13N5O4	[M+H]+	Adenosine	58-61-7	2104300	1510200	1563900	1062700	1169300	1158200	1115200	1254800	1191300	ko00230,ko01100,ko02010
pme2890	269.06	136	268.055	C8H16N2O4S2	[M+H]+	L-Homocystine	626-72-2	5198.2	3476	1547.9	5420.1	5425.8	9	7536.3	2496.5	8344	ko00270
mws1060	267.07	135	268.081	C10H12N4O5	[M-H]-	9-(Arabinosyl)hypoxanthine	7013-16-3	879690	692130	459530	1177500	820590	964460	613770	359370	535290	--
pmp000086	269.1	177.05	268.095	C13H16O6	[M+H]+	1-Feruloyl-sn-glycerol	-	319890	238250	241300	311280	237470	283920	236200	323810	266750	--
pmp000087	269.1	177.05	268.095	C13H16O6	[M+H]+	2-Feruloyl-sn-glycerol	-	433470	384560	390930	286720	367610	331770	313270	320220	282690	--
mws0383	267.23	267.23	268.24	C17H32O2	[M-H]-	Cis-10-Heptadecenoic Acid	29743-97-3	9422900	3425100	2644100	2451700	3562100	3298100	2419800	3116800	2564200	--
mws0362	269.25	269.24	270.256	C17H34O2	[M-H]-	Heptadecanoic acid	506-12-7	253730	117120	70381	67809	82903	103500	66678	66434	64065	--
Lmmn003323	271.23	225.22	272.235	C16H32O3	[M-H]-	2-Hydroxyhexadecanoic acid	764-67-0	7176200	5773000	7823400	8325100	11097000	9980000	7546200	8517800	7906300	--
pme1712	275	257	276.132	C11H20N2O6	[M-H]-	L-Saccharopine	997-68-2	51948	35872	49470	81184	49312	57098	56581	47175	47541	ko00300,ko00310,ko01100,ko01110,ko01230
pmb1574	277.2	93	276.2	C18H28O2	[M+H]+	9,12-Octadecadien-6-Ynoic Acid	61481-29-6	245120	35785	27930	21719	71333	31132	22976	47743	31046	--
mws1038	277.12	146	278.13	C11H22N2O4S	[M-H]-	Pantetheine	496-65-1	54613	79431	81031	55873	57246	59636	83020	49641	68320	ko00332,ko00770,ko01110
Lmlp012720	279.16	149.02	278.152	C16H22O4	[M+H]+	Dibutyl phthalate	84-74-2	41036000	40929000	49630000	41767000	45452000	46518000	43023000	42401000	46059000	--
pmp001230	279.16	121	278.152	C16H22O4	[M+H]+	Senkyunolide M	146986-60-9	4913900	5065100	6475200	5257700	5757800	6011800	5636400	5248400	6074400	--
Lmhp003013	279.17	177.05	278.163	C15H22N2O3	[M+H]+	N-Feruloyl-Cadaverine	-	128470	84232	209740	101340	147560	74917	236680	158290	138670	--
mws5035	279.17	120.08	278.163	C15H22N2O3	[M+H]+	L-Leucyl-L-phenylalanine	56217-82-4	58982	45890	66723	40174	105980	87171	38179	68512	61263	--
pmb0889	279.23	95.1	278.225	C18H30O2	[M+H]+	Punicic acid (9Z,11E,13Z-octadecatrienoic acid)	544-72-9	23021000	738840	506190	448190	2391700	407620	447320	900060	671930	--
Lmbn005923	277.22	59.01	278.225	C18H30O2	[M-H]-	Crepenynic acid	2277-31-8	937930	749430	676380	572860	680960	583270	566560	677680	663700	ko00591
Lmhn002926	279.05	163.04	280.058	C13H12O7	[M-H]-	p-Coumaroylmalic acid	-	15701	19407	12340	9550.6	20536	19159	16963	12507	13914	--
mws0629	281.11	166	280.106	C13H16N2O5	[M+H]+	L-Aspartyl-L-Phenylalanine	13433-09-5	91902	89975	104520	88948	90899	75436	84419	72770	81338	--
Lmhp002501	281.15	177.05	280.142	C14H20N2O4	[M+H]+	N-Feruloylhydroxyputrescine	-	64212	62248	88400	104780	81246	71372	116920	85664	77539	--
Lmbn006152	279.23	59.01	280.24	C18H32O2	[M-H]-	(9Z,11E)-Octadecadienoic acid	2540-56-9	256750	95387	126840	111140	140100	139380	105440	126470	104400	ko00591
YC512118	282.28	247.24	281.272	C18H35NO	[M+H]+	Oleamide (9-Octadecenamide)	301-02-0	324020	182230	228110	236860	594580	281840	264570	544190	335070	--
mws2623	281.25	281.25	282.256	C18H34O2	[M-H]-	11-Octadecanoic acid(Vaccenic acid)	506-17-2	15493000	20411000	17023000	16213000	8089100	21647000	9928700	16041000	15251000	--
mws0396	281.25	281.25	282.256	C18H34O2	[M-H]-	Elaidic Acid	112-79-8	54883000	31628000	26429000	25142000	30917000	33418000	19052000	25525000	22332000	--
pme3350	284.1	168	283.092	C10H13N5O5	[M+H]+	8-Hydroxy-2-deoxyguanosine	88847-89-6	8458.1	7075.8	3970.3	7154.5	4272.6	5506.5	2293.8	4704.2	5549	--
pme1178	284.1	152	283.092	C10H13N5O5	[M+H]+	Guanosine	118-00-3	4560900	3879100	3571200	4430400	4963500	3688200	2987200	2861100	3210000	ko00230,ko01100,ko02010
pmp001252	284.13	147.04	283.121	C17H17NO3	[M+H]+	p-Coumaroyltyramine	36417-86-4	791200	1693800	1813800	1973300	761310	1334400	2364600	1109500	1121400	--
mws0668	283.07	151	284.076	C10H12N4O6	[M-H]-	Xanthosine	146-80-5	2101300	1811200	1394000	1709300	1626400	1842500	1400300	1406500	1644400	ko00230,ko00232,ko01100,ko01110,ko02010
mws1489	283.26	283.26	284.272	C18H36O2	[M-H]-	Stearic Acid	57-11-4	1749300	2153000	1544300	1650500	1318300	1692200	1675300	1564500	1447400	ko00061,ko01040
Zmyn005026	283.26	283.26	284.272	C18H36O2	[M-H]-	16-Methylheptadecanoic acid	2724-58-5	9	9	69139	53625	40606	44372	35268	105360	44941	--
pmb3081	289	97	290.004	C6H11PO11	[M-H]-	Glucarate O-Phosphoric acid	-	7173100	12481000	11637000	11390000	10729000	11079000	8326300	10039000	8673200	--
pme3163	289	97	290.04	C7H15O10P	[M-H]-	D-Sedoheptuiose 7-phosphate	2646-35-7	3837600	6442400	5918700	6512100	4965500	5835600	4451600	5216700	4396000	--
pme0460	291.09	139.04	290.079	C15H14O6	[M+H]+	Epicatechin	490-46-0	22348	26415	24296	20987	11348	32030	28413	22312	16324	ko00941,ko01100,ko01110
pmb2657	289.1	97.1	290.123	C10H18N4O6	[M-H]-	Argininosuccinic acid	2387-71-5	164830	281860	348430	305280	328490	394050	322810	356990	314010	ko00220,ko00250,ko01100,ko01110,ko01230
Zmyn004548	291.2	235.17	292.204	C18H28O3	[M-H]-	12-Oxo-phytodienoic acid	85551-10-6	80124	34908	22889	15893	56790	24636	17638	33138	24547	ko00592,ko01100,ko01110
pmb2786	293.21	235.17	294.219	C18H30O3	[M-H]-	9-Hydroxy-10,12,15-octadecatrienoic acid	89886-42-0	79560	10947	6359.2	4579.6	18321	6436.8	6085.2	14928	8852.3	ko00592
pmb2792	293.21	193.1	294.219	C18H30O3	[M-H]-	13-Hydroxy-6,9,11-octadecatrienoic acid	74784-20-6	51821	42913	50260	35840	55805	44111	54238	47145	122620	--
Lmqp000329	296.07	104.11	295.056	C8H14N3O7P	[M+H]+	5-Aminoimidazole ribonucleotide	25635-88-5	10967000	2353700	2677400	2828700	4438100	2507500	3315400	2962600	3605100	--
Lmbn005369	295.23	195.14	296.235	C18H32O3	[M-H]-	13(S)-HODE;13(S)-Hydroxyoctadeca-9Z,11E-dienoic acid	10219-69-9	3531300	424160	272970	214720	746950	232830	250370	480210	386410	ko00591
Rfmb091	295.23	195.14	296.235	C18H32O3	[M-H]-	9S-Hydroxy-10E,12Z-octadecadienoic acid	15514-85-9	3363400	374390	262480	207120	689820	213600	226220	415550	353150	ko00591
Lmbn005662	295.23	171.1	296.235	C18H32O3	[M-H]-	9(10)-EpOME;(9R,10S)-(12Z)-9,10-Epoxyoctadecenoic acid	16833-56-0	922620	144320	97375	85023	228090	92409	76444	156360	114090	ko00591,ko01100
pmb2799	295.23	195.2	296.235	C18H32O3	[M-H]-	12,13-Epoxy-9-Octadecenoic Acid	6799-85-5	656560	137840	97926	89735	216260	103310	73408	140350	102650	ko00591,ko01100
pme1474	298.1	136	297.09	C11H15N5O3S	[M+H]+	5'-Deoxy-5'-(methylthio)adenosine	2457-80-9	3150500	2830700	2564200	2096800	2569200	2630100	1811700	2308900	1964800	ko00270,ko00908,ko01100
pmb0197	298.1	166.3	297.107	C11H15N5O5	[M+H]+	N7-Methylguanosine	20244-86-4	22108	16301	21983	20775	15649	14596	14332	17760	19646	--
Hmyn000254	297.12	59.01	298.12	C18H18O4	[M-H]-	Tababiphenyl C	1644433-50-0	39693	50992	53965	66546	36351	53436	46268	49524	52717	--
pmf0297	297.32	183.1	298.324	C20H42O	[M-H]-	1-Eicosanol	629-96-9	22734	20688	17157	16680	18308	16192	16303	15638	16504	--
mws0724	298.08	208	299.087	C10H13N5O6	[M-H]-	8-Hydroxyguanosine	3868-31-3	39733	72939	39459	35829	35760	33156	36076	30916	23373	--
Zmhn001926	299.08	137.02	300.084	C13H16O8	[M-H]-	1-O-Salicyl-D-glucose	60517-74-0	70852	71708	72511	62244	86047	65443	91960	62604	91103	--
Zmhn001358	299.08	137.02	300.084	C13H16O8	[M-H]-	4-O-Glucosyl-4-hydroxybenzoic acid	-	32742	30985	41205	34314	32523	31569	29420	33068	28995	--
Hmtn001302	299.08	137.02	300.085	C13H16O8	[M-H]-	Glucosyloxybenzoic acid	-	71104	78664	83577	75437	83854	78894	78230	72210	71580	--
pmb3142	299.1	137.1	300.085	C13H16O8	[M-H]-	Salicylic acid-2-O-glucoside	10366-91-3	2110900	2498000	2648700	2859300	2162100	2578600	2478200	2306000	2041300	--
Hmyn001360	299.11	59.01	300.135	C18H20O4	[M-H]-	Doitungbiphenyl A	-	20334	19745	28302	26253	17992	24811	21165	23421	23835	--
Zmyn005384	299.26	253.26	300.266	C18H36O3	[M-H]-	2R-Hydroxyoctadecanoic Acid	26633-48-7	258330	171360	388680	317830	350180	420690	239350	240250	287640	--
Lmqn008288	299.26	299.26	300.267	C18H36O3	[M-H]-	3-Hydroxyoctadecanoic Acid	45261-96-9	205900	184970	468270	505530	205360	377860	797790	1225700	188400	--
Zmhn000892	301.09	139.05	302.1	C13H18O8	[M-H]-	4-O-Glucosyl-3,4-dihydroxybenzyl alcohol	-	119370	142850	130130	156940	138670	148870	134210	124200	130100	--
mws0397	301.22	257.23	302.225	C20H30O2	[M-H]-	Cis-5,8,11,14,17-Eicosapentaenoic Acid	10417-94-4	6871.7	9	9	9	9	9	9	9	9	ko01040
mws1375	304.15	185.09	303.143	C12H21N3O6	[M+H]+	Nicotianamine	34441-14-0	41315	37652	58645	50349	49919	31789	27858	31691	29125	--
Lmlp001883	304.15	138.09	303.35	C17H21NO4	[M+H]+	Scopolamine	51-34-3	34570	46146	26725	30925	33488	33927	32386	28659	32586	ko00960,ko01100,ko01110
mws0044	303.05	125.02	304.058	C15H12O7	[M-H]-	Dihydroquercetin(Taxifolin)	480-18-2	14508	9777.1	11447	22934	14379	18334	11101	8595.2	11016	ko00941,ko01100,ko01110
mws0369	303.23	258.9	304.24	C20H32O2	[M-H]-	Arachidonic Acid	506-32-1	99195	52305	33103	28675	47827	40584	21913	34402	22426	ko00590,ko00591,ko01040,ko01100
Lmlp001982	306.16	140.11	305.163	C17H23NO4	[M+H]+	Anisodamine	55869-99-3	9	9	4155.2	9564.6	9	9774.6	9	6667.8	6655.2	--
mws1604	306.21	137	305.199	C18H27NO3	[M+H]+	Capsaicin	404-86-4	7613.8	7635.4	7500	7340.9	6765.8	8382.2	12478	6145.1	6817	ko00998,ko01100,ko01110
Zmpn003698	305.25	59.01	306.256	C20H34O2	[M-H]-	11,14,17-Eicosatrienoic acid	17046-59-2	15720	5152.7	2016.9	916.62	1381.9	1408.4	997.09	1485	897.18	ko01040
pmn001610	307.26	307.3	308.272	C20H36O2	[M-H]-	Eicosadienoic acid	5598-38-9	630900	323930	337290	332540	336320	258520	174480	464330	440070	ko01040
Lmhn003074	309.06	193.05	310.069	C14H14O8	[M-H]-	Feruloylmalic acid	-	956660	996710	1081500	1055700	801650	856590	1007000	1014400	839310	--
pmb2791	309.21	209.1	310.1	C18H30O4	[M-H]-	9-Hydroperoxy-10E,12,15Z-octadecatrienoic acid	111004-08-1	21700	7028.9	6687.4	7316.6	11995	9827.5	10888	9510.8	16026	ko00592,ko01110
pmn001606	309.28	309.28	310.287	C20H38O2	[M-H]-	Eicosenoic acid	26764-41-0	195000	191870	228910	158170	172140	176290	216270	209760	275570	ko01040
pme3967	312.13	180	311.123	C12H17N5O5	[M+H]+	2-(Dimethylamino)guanosine	2140-67-2	259540	258650	280160	216930	246200	222020	264860	213580	212750	--
pmb2804	311.1	171.3	312.1	C18H32O4	[M-H]-	13S-Hydroperoxy-9Z,11E-octadecadienoic acid	33964-75-9	9538800	307420	294880	391720	1677700	352550	230300	344720	318560	ko00591,ko01100
Rfmb087	311.22	293.21	312.23	C18H32O4	[M-H]-	9-Hydroxy-13-oxo-10-octadecenoic Acid	-	2125700	68941	60426	69176	298160	56974	50221	75940	63463	--
Lmbn005287	311.22	249.22	312.23	C18H32O4	[M-H]-	7S,8S-DiHODE; (9Z,12Z)-(7S,8S)-Dihydroxyoctadeca-9,12-dienoic acid	143288-65-7	1634800	586350	570110	1011900	2525300	1270600	345510	964850	632630	ko00591
pmn001689	311.22	223.17	312.23	C18H32O4	[M-H]-	9-Hydroxy-12-oxo-15(Z)-octadecenoic acid	-	29702	7339.5	8195.2	5856	9698	5110.3	6271.8	8301.8	7637.6	ko00592,ko01110
mws1433	314.14	177.05	313.131	C18H19NO4	[M+H]+	N-Feruloyltyramine	66648-43-9	3463300	6475900	7335000	3687900	2642300	4137700	6461200	3994100	4576000	--
Cmzp002057	315.12	255.1	314.1	C14H18O8	[M+H]+	6-O-Acetylarbutin	10338-88-2	21589	28319	28386	18209	24854	18790	28548	18243	23198	--
Lmbn005487	313.24	251.24	314.246	C18H34O4	[M-H]-	12,13-DHOME; (9Z)-12,13-Dihydroxyoctadec-9-enoic acid	263399-35-5	96466	54940	59954	62934	122390	62581	41947	65566	59558	ko00591
Lmdp003808	317.07	302.04	316.058	C16H12O7	[M+H]+	Azaleatin (5-O-Methylquercetin)	529-51-1	57111	45693	59248	33240	12967	18059	49478	39368	26434	--
pmb2871	315.07	153	316.079	C13H16O9	[M-H]-	2,5-Dihydroxybenzoic acid O-glucoside	-	18746000	19696000	17773000	21417000	20501000	21560000	17791000	16917000	16846000	--
Hmtn001120	315.11	153.06	316.116	C14H20O8	[M-H]-	5-(2-Hydroxyethyl)-2-O-glucosylphenol	-	2103000	2233500	2414500	2421200	2185800	2106100	2325400	2527600	2301900	--
pmb0751	321.1	147.3	320.09	C16H16O7	[M+H]+	Trans-5-O-(p-Coumaroyl)shikimate	-	39954	26696	48154	63317	38096	42948	42991	34788	47311	ko00940,ko00941,ko00945,ko01100,ko01110
pmb3075	319	145.1	320.09	C16H16O7	[M-H]-	3-O-p-Coumaroylshikimic acid	-	13048	12294	17679	16677	12429	15634	18475	13483	8486.5	--
mws0582	322.11	130	321.099	C11H19N3O6S	[M+H]+	S-(Methyl)glutathione	2922-56-7	131810	124320	176700	165910	144860	119160	220810	110760	160250	--
pme3174	324.06	112	323.052	C9H14N3O8P	[M+H]+	Cytidine 5'-monophosphate(Cytidylic acid)	63-37-6	55759	50665	56328	53909	47017	55976	40116	38494	40050	ko00240,ko01100
pme2074	322.4	129.7	323.21	C18H29NO4	[M-H]-	(-)-Jasmonoyl-L-Isoleucine	120330-93-0	83215	106340	473930	274260	194810	269800	246040	378890	758440	ko04075
pme3188	323.03	211	324.036	C9H13N2O9P	[M-H]-	Uridine 5'-monophosphate	58-97-9	112100	126100	141930	99320	128660	168700	144320	117380	107440	ko00240,ko01100
YC512115	325.15	163.13	324.147	C19H20N2O3	[M+H]+	Nicotine-N-glucoside	911474-72-1	31264	12154	20006	20969	19322	17054	21670	14528	15108	--
YC512112	325.18	163.12	324.169	C16H24O5N2	[M+H]+	Anabasine-glucoside	-	22283	14755	25131	33247	22778	16760	16618	17802	19375	--
mws0983	326.31	62.06	325.298	C20H39NO2	[M+H]+	N-Oleoylethanolamine	111-58-0	267680	83498	272170	298580	101530	111380	60729	72989	81057	--
Zmhn002301	325.09	163.04	326.1	C15H18O8	[M-H]-	p-Coumaric acid-4-O-glucoside	117405-48-8	29456	43820	41438	59445	46691	52941	29203	41531	42487	--
pmn001690	327.14	165.09	328.152	C16H24O7	[M-H]-	3-Hydroxy-4-isopropylbenzylalcohol-3-O-glucoside	-	21673	49617	41777	48714	39864	35907	37007	36609	39176	--
pmn001691	327.22	291.2	328.225	C18H32O5	[M-H]-	9,12,13-Trihydroxy-10,15-octadecadienoic acid	-	217020	7865.3	11236	12444	31813	9194.8	9347.5	11403	8430.8	--
mws0371	327.23	283.3	328.24	C22H32O2	[M-H]-	Cis-4,7,10,13,16,19-Docosahexaenoic Acid	6217-54-5	6412.5	5457.3	6270.4	4670.9	4897	5299.2	6210	5599	7474.3	ko01040
mws0884	328.05	134.2	329.053	C10H12N5O6P	[M-H]-	Cyclic 3',5'-Adenylic acid	60-92-4	142650	161900	162150	257460	521290	366270	156210	174270	135910	ko00230,ko01100
HJN013	328.12	161.02	329.126	C18H19NO5	[M-H]-	N-Feruloyloctopamine	66648-44-0	1025800	836260	902050	1192100	1181400	789810	1243600	779380	869730	--
pmn001692	328.12	295.09	329.126	C18H19NO5	[M-H]-	3-O-Acetylhamayne	-	185330	133300	160640	194930	199620	160990	180820	167160	163650	--
pmn001517	329.12	167	330.131	C15H22O8	[M-H]-	3,4,5-Trimethoxyphenyl-1-O-Glucoside	-	43389000	46046000	48912000	51907000	43983000	44275000	47962000	47012000	46073000	--
pmn001694	329.23	229.15	330.241	C18H34O5	[M-H]-	9,10,13-Trihydroxy-11-Octadecenoic Acid	29907-57-1	3034800	316540	320920	412280	596010	295660	244720	304880	248170	ko00591
pmp001284	331.28	313.27	330.277	C19H38O4	[M+H]+	Monopalmitin	542-44-9	262880	263950	353710	279220	137930	253420	224510	182110	219610	--
pme3184	332.08	136	331.068	C10H14N5O6P	[M+H]+	2'-Deoxyadenosine-5'-monophosphate	653-63-4	377640	411590	417160	432670	390410	382670	412820	333570	405060	ko00230,ko01100
pmb0789	332.13	152.07	331.127	C14H21NO8	[M+H]+	Pyridoxine-5'-O-glucoside	-	1133600	1179000	1274100	1317100	1346600	1107700	1181400	1068000	1204300	--
pmc0066	333.05	137.05	332.052	C10H13N4O7P	[M+H]+	2'-Deoxyinosine-5'-monophosphate	3393-18-8	162560	277300	179450	78694	134340	146830	131720	104180	117760	ko00230
Lmfn000604	331.07	169.01	332.074	C13H16O10	[M-H]-	6-O-Galloyl-glucose*	13186-19-1	70363	52701	60851	51521	9	45344	99159	78565	57409	--
Zmhn001703	331.07	169.02	332.074	C13H16O10	[M-H]-	5-O-Galloyl-D-hamamelose*	-	55597	27621	66056	40497	9	51597	91914	60804	49143	--
pmn001518	331.07	169.01	332.074	C13H16O10	[M-H]-	1-O-Galloyl-D-glucose*	58511-73-2	213170	279950	277450	352520	236040	522200	355470	259880	252440	--
Lmmn001294	331.1	153.02	332.111	C14H20O9	[M-H]-	Koaburaside	41653-73-0	63061	48815	59593	60014	39509	65567	81332	51406	54619	--
mws0675	335.06	123	334.057	C11H15N2O8P	[M+H]+	β-Nicotinamide mononucleotide	1094-61-7	242930	175610	123940	94270	140230	94123	100070	105580	140090	ko00760,ko01100
Lmqn000432	333.06	333.06	334.067	C9H19O11P	[M-H]-	1-(sn-Glycero-3-phospho)-1D-myo-inositol	-	1305600	821780	829940	759770	1187000	811120	939440	780040	1009000	--
Hmln002806	335.08	179.03	336.085	C16H16O8	[M-H]-	5-O-Caffeoylshikimic acid	180981-12-8	376850	358670	576760	275530	231340	343080	342870	463540	277850	ko00940,ko00941,ko00945,ko01100,ko01110
pmn001421	337.09	191.05	338.1	C16H18O8	[M-H]-	3-O-p-Coumaroylquinic acid*	87099-71-6	8074000	8930600	9867600	11035000	9225900	11979000	11138000	9966800	7524300	--
pma6460	337.09	163.04	338.1	C16H18O8	[M-H]-	4-O-p-Coumaroylquinic acid*	32451-86-8	39782	38317	58994	53555	40687	61554	60304	43200	50642	--
pmb3074	337.09	191.05	338.1	C16H18O8	[M-H]-	5-O-p-Coumaroylquinic acid*	1899-30-5	7400500	8105300	10767000	9903400	7883900	13596000	11331000	8950000	8647100	ko00940,ko00941,ko00945,ko01110
YC512113	339.16	177.1	338.148	C16H22N2O6	[M+H]+	Cotinine-glucoside	-	63897	45129	72220	51567	37032	52973	69412	40784	42598	--
Lmyp000435	339.16	177.1	338.148	C16H22N2O6	[M+H]+	Nicotine-N-glucuronide	152306-59-7	50282	46849	69558	60672	37659	37115	41738	51987	31696	--
pmp000041	340.21	322.2	339.205	C18H29NO5	[M+H]+	Tuberocrooline	-	23702	47738	42264	39293	30598	26922	35538	28183	22949	--
Zmyn000083	338.99	78.96	339.996	C6H14O12P2	[M-H]-	D-Glucose 1,6-bisphosphate	10139-18-1	7844.2	9	9000.7	9330.2	8894.8	9	9348.9	10831	8568.9	ko00500,ko01100
pmn001420	341.09	179.04	342.095	C15H18O9	[M-H]-	1-O-[(E)-Caffeoyl]-D-glucose	-	631060	640940	568240	794470	1168300	694610	564110	752090	797310	--
Zmjn000425	341.11	89.02	342.116	C12H22O11	[M-H]-	D-Lactulose	4618-18-2	477430	829920	517800	1951400	584490	536890	1000800	756640	741960	--
mws5038	341.11	89.02	342.116	C12H22O11	[M-H]-	Isomaltulose	13718-94-0	4131600	3141600	4222700	3018200	3189400	3576500	2506000	3312600	3434200	--
mws0264	341.11	119	342.116	C12H22O11	[M-H]-	D-(+)-Trehalose	99-20-7	2483800	2201800	2441300	2678000	1590700	1902900	1866000	1987500	1708400	ko00500,ko01100,ko01110,ko02010
mws1080	341.11	179	342.116	C12H22O11	[M-H]-	Galactinol	3687-64-7	11291000	12558000	11937000	11186000	10356000	10872000	10801000	11616000	11268000	ko00052,ko01100
mws1333	341.11	113	342.116	C12H22O11	[M-H]-	Melibiose	585-99-9	1996300	1671500	1604300	1627700	1479800	1202100	1626100	2068500	1599900	ko00052,ko01100,ko02010
pme0519	341.11	119	342.116	C12H22O11	[M-H]-	D-(+)-Sucrose	57-50-1	4954500	4925300	6050000	5799500	4870800	3977300	5057100	4200400	5329000	ko00052,ko00500,ko01100,ko01110,ko02010
MA10039641	341.11	89.02	342.116	C12H22O11	[M-H]-	Lactobiose	63-42-3	3942200	3491000	3567300	2960500	2680100	3150000	3111900	2791000	3802300	ko00052,ko01100,ko02010
mws0906	341.12	179	342.131	C16H22O8	[M-H]-	Coniferin	531-29-3	4916900	4209200	3933500	2880900	2804800	3244300	4452400	4781800	3253000	ko00940
pmb2211	343.3	240.7	342.288	C19H38N2O3	[M+H]+	Cocamidopropyl betaine	4292-10-8	72830	52677	143210	72345	48880	72624	57597	45869	56200	--
HJAP050	344.15	177.05	343.142	C19H21NO5	[M+H]+	N-Feruloyl-3-methoxytyramine	78510-19-7	305150	392840	1754200	281830	256990	290260	826290	315250	718810	--
Zmln000899	343.11	181.05	344.111	C15H20O9	[M-H]-	Syringaldehyde-4-O-glucoside	-	90898	71635	111230	96609	105980	95549	153280	83856	123730	--
Lmmn000774	343.1	181.05	344.111	C15H20O9	[M-H]-	Dihydrocaffeoylglucose	-	90666	87520	131730	122790	111630	100600	155540	79279	138990	--
mws0609	344.04	150	345.047	C10H12N5O7P	[M-H]-	Guanosine 3',5'-cyclic monophosphate	7665-99-8	185800	213480	210770	314390	545270	352950	223890	210500	188840	ko00230,ko01100
pmb0801	346.11	184.1	345.106	C14H19NO9	[M+H]+	4-Pyridoxic acid-O-glucoside	-	281470	318130	402800	319980	300070	295690	349500	266960	353900	--
Lmtn000940	345.08	139.04	346.09	C14H18O10	[M-H]-	1-O-(3,4-Dihydroxy-5-methoxy-benzoyl)-glucoside	-	17643	22043	21337	22776	12394	25911	29752	18715	23444	--
mws1629	345.12	183.2	346.126	C15H22O9	[M-H]-	Aucubin	479-98-1	30522	31221	33388	34083	17492	29370	22131	25946	28148	--
pmb0981	348.07	136	347.063	C10H14N5O7P	[M+H]+	Adenosine 5'-monophosphate	61-19-8	158850	116520	106980	88464	100030	93158	105150	99124	135900	ko00230,ko00908,ko01100,ko01110
pmb1562	351.25	146.9	350.246	C21H34O4	[M+H]+	1-Stearidonoyl-Glycerol	-	9	5801.2	8315.8	4125.9	8449.1	5508.3	10129	7809.9	7808.8	--
Lmhp011562	353.27	261.22	352.261	C21H36O4	[M+H]+	1-α-Linolenoyl-glycerol	-	564460	2191700	2601100	2456400	650050	2519300	2291900	1113300	1344000	--
Lmhp011388	353.27	261.22	352.261	C21H36O4	[M+H]+	2-α-Linolenoyl-glycerol	55268-58-1	495930	1844300	2190000	1731300	632130	2006600	1850200	1042000	1266200	--
mws0748	353.09	191.1	354.095	C16H18O9	[M-H]-	1-Caffeoylquinic acid	1241-87-8	75383	65718	138080	121890	142780	72401	82073	91875	138610	--
mws0178	353.09	191.01	354.095	C16H18O9	[M-H]-	Chlorogenic acid*	327-97-9	7861400	7166300	7858400	5811500	4898700	6127000	6722200	6478900	5961800	ko00940,ko00941,ko00945,ko01110
pme1816	353.09	191	354.095	C16H18O9	[M-H]-	Neochlorogenic acid(5-O-Caffeoylquinic acid)*	906-33-2	31964000	27150000	29637000	26630000	15779000	21664000	33091000	29606000	24906000	--
mws2108	353.09	135.1	354.095	C16H18O9	[M-H]-	Cryptochlorogenic acid*	905-99-7	3432500	1501300	2503500	2288000	1649400	2267000	3311300	2475800	2436000	--
Lmhp112042	355.28	263.24	354.277	C21H38O4	[M+H]+	1-Linoleoylglycerol	2277-28-3	822560	1785300	1918000	1978600	636620	1929800	1725000	1079700	1211800	--
pmp001283	355.28	337.27	354.277	C21H38O4	[M+H]+	1-Monolinolein	26545-74-4	183450	480550	484540	600070	577380	466390	689580	410390	576480	--
Lmhp012042	355.28	263.24	354.277	C21H38O4	[M+H]+	2-Linoleoylglycerol	3443-82-1	1418900	3174000	3682000	3447200	1369100	3355600	3170200	2171700	2310700	--
Zmhn002422	355.1	193.05	356.11	C16H20O9	[M-H]-	1-O-Feruloyl-D-Glucose	-	13578000	14887000	13517000	13382000	15046000	14722000	13346000	16682000	13520000	--
mws1546	357.12	149.06	356.111	C16H20O9	[M+H]+	Gentiopicroside	20831-76-9	39027	27284	31639	16124	8057.8	17677	23842	29119	21072	ko01110
Zmhn003082	357.08	173.04	358.09	C15H18O10	[M-H]-	5-O-Galloyl-methyl quinine ester	-	25422	29020	22564	14700	21261	15080	15489	25155	24609	--
mws1526	359.13	197	358.126	C16H22O9	[M+H]+	Sweroside	14215-86-2	62682	82702	87656	60176	78667	78924	60504	81119	59682	--
mws0097	357.13	151	358.142	C20H22O6	[M-H]-	Pinoresinol*	487-36-5	31142	25072	28032	22730	29312	28086	29194	38801	29510	ko00998,ko01110
Lmdn004267	357.13	151.04	358.142	C20H22O6	[M-H]-	Epipinoresinol*	24404-50-0	32979	23790	31120	26151	31779	30859	31512	36259	30432	--
pme0085	359.08	196.7	360.084	C18H16O8	[M-H]-	Rosmarinic acid	537-15-5	15460	29792	22005	19420	31237	24204	23619	34087	34889	ko00350,ko01100
pmb3107	359.1	182.1	360.106	C15H20O10	[M-H]-	Glucosyringic Acid	-	9	9	9	9	10471	6795.1	14563	5174.4	7868.3	--
pmb0998	364.07	152.1	363.058	C10H14N5O8P	[M+H]+	Guanosine 5'-monophosphate	85-32-5	30511	21655	28037	17620	40681	40473	17840	15922	22781	ko00230,ko01100
mws5040	365.11	203.05	364.078	C12H21O11Na	[M+H]+	Turanose	547-25-1	36100000	31858000	32771000	43579000	35271000	44581000	37320000	38641000	29725000	--
pmb0964	366.2	204.1	365.17	C16H23N5O5	[M+H]+	Isopentenyladenine-7-N-glucoside	-	3025800	2663100	3195600	4502600	2792000	4836000	3537700	3272500	2551600	--
Lmgp003270	369.16	177.06	368.074	C16H16O10	[M+H]+	Scopoletin-7-O-glucuronide	132752-65-9	54916000	59262000	64172000	63023000	56971000	66029000	55516000	48968000	46320000	--
pmb0752	369.12	177.1	368.111	C17H20O9	[M+H]+	3-O-Feruloylquinic acid*	1899-29-2	780260	998510	1020400	905310	800260	913700	744310	867870	593430	--
pma3724	369.1	177.1	368.111	C17H20O9	[M+H]+	1-O-Feruloylquinic acid*	-	53406000	61643000	64282000	63884000	59616000	65359000	56236000	55205000	50313000	--
Lmgn003073	735.22	367.11	368.111	C17H20O9	[2M-H]-	5-O-Feruloylquinic acid*	-	242870	368270	495070	467640	262360	457340	314080	251680	188530	--
pmn001695	371.1	249.06	372.106	C16H20O10	[M-H]-	Trihydroxycinnamoylquinic acid	-	63935	89358	52983	62183	59195	74815	67974	69073	71616	--
mws0011	371.13	209	372.142	C17H24O9	[M-H]-	Syringin	118-34-3	33713	41942	30980	32982	32008	31609	22398	29279	38320	ko00940
pmb0108	375.2	137.1	374.1	C19H18O8	[M+H]+	Feruloyl syringic acid	-	807890	731460	668120	585990	840970	658710	831540	878280	903730	--
mws0232	377.15	243	376.138	C17H20N4O6	[M+H]+	Riboflavin	83-88-5	472240	453870	622650	508530	475750	426610	437180	415360	452950	ko00740,ko01100,ko01110,ko02010
pme3337	384.12	252	383.108	C14H17N5O8	[M+H]+	Succinyladenosine	4542-23-8	988310	1104200	1111900	1240300	1033300	1050400	1028500	884720	1168500	--
pmb3062	385.1	151.1	386.102	C17H22O10	[M-H]-	1-O-Eudesmoylquinic acid	-	12277	13737	16289	19796	13217	16394	24537	26951	5798.5	--
pmb2940	385.11	205	386.121	C17H22O10	[M-H]-	1-O-Glucosyl sinapate	78185-48-5	2710900	2706900	1694900	2618800	1415400	1546000	2763300	2402700	2491600	--
Zmhn002227	385.11	223.06	386.121	C17H22O10	[M-H]-	4-O-Glucosyl-sinapate	-	24936	21706	17098	17515	22267	20489	21874	22327	30328	--
HJN003	385.11	223.06	386.122	C17H22O10	[M-H]-	1-O-Sinapoyl-D-glucose	-	302320	260010	189520	286680	178350	192040	327000	250290	297180	ko00940
pmn001423	385.19	223.13	386.194	C19H30O8	[M-H]-	Roseoside	54835-70-0	851290	771800	578910	775050	467870	541060	898220	736510	835880	--
Hmln003169	387.14	329.14	388.153	C21H24O7	[M-H]-	Trachelogenin	34209-69-3	240350	14027	13928	16853	57223	15939	10876	15599	13665	--
Lmzn001582	387.17	207.1	388.174	C18H28O9	[M-H]-	5'-Glucosyloxyjasmanic acid	-	64905	76895	60623	82055	55143	50485	93472	73523	85807	--
Zmhn001970	389.12	227.08	390.131	C20H22O8	[M-H]-	Piceid	27208-80-6	9	5166.5	47968	9	9	9	25035	9	8258.9	--
Hmjn003484	251.03	207.04	390.276	C24H38O4	[M-H]-	Bis(2-ethylhexyl) phthalate	117-81-7	13331	10632	24636	11170	7552.7	19745	14735	14062	18467	--
Lmhn002573	399.09	205.04	400.101	C17H20O11	[M-H]-	Sinapoylglucuronic acid	-	9	5986.2	9266	9	9926.3	8979.9	5805.7	7573.2	11195	--
mws0043	403.14	373.1	402.131	C21H22O8	[M+H]+	Nobiletin (5,6,7,8,3',4'-Hexamethoxyflavone)	478-01-3	305030	318070	1180100	333600	333950	316760	298750	292590	263980	--
Lmfp004842	414.34	253.19	413.329	C27H43NO2	[M+H]+	Tomatidinol	-	4734900	5708700	5447700	6542000	4553300	6282200	5826400	5109500	5458900	--
mws1363	414.34	253.1	413.329	C27H43NO2	[M+H]+	Solasodine	126-17-0	13039	11236	14907	19948	11620	13668	14276	15606	23574	--
Lmfp007005	414.34	271.2	413.329	C27H43NO2	[M+H]+	Tomatidenol (Dehydrotomatidine)	546-40-7	343820	418550	380840	398640	364330	397760	369370	446700	433680	--
pmn001319	413.12	398.1	414.131	C22H22O8	[M-H]-	1-O-Feruloyl-3-O-p-Coumaroylglycerol	-	7045.7	6712.2	13506	7883.4	10682	7359.7	8353.7	6994.4	8293	--
Lmhn001773	416.06	179.03	415.054	C19H13NO10	[M-H]-	Caffeoylnicotinoyltartaric acid	-	680470	578180	619640	594540	310870	467620	582610	589280	458520	--
Hmfp003085	416.34	398.34	415.345	C27H45NO2	[M+H]+	Tomatidine	77-59-8	28558	70180	60215	51319	22073	32535	76136	28292	43123	--
Lmfp006712	416.35	416.35	415.345	C27H45NO2	[M+H]+	Soladulcidine	511-98-8	25115	30809	28450	26548	17543	25419	35461	34464	39626	--
Lmbp003668	419.1	287.05	418.09	C20H18O10	[M+H]+	Kaempferol-3-O-arabinoside	-	9	9	3298.8	9	9	9	9	8487.8	9	--
Hmcn002743	417.15	181.04	418.162	C22H26O8	[M-H]-	Lirioresinol A	21453-71-4	31816	61397	81328	30741	33880	36033	41294	53084	47748	--
pmn001663	417.16	402.1	418.163	C22H26O8	[M-H]-	Syringaresinol	21453-69-0	6913.3	13082	19899	7463.9	7987.4	8518.9	11842	14586	10837	--
mws2523	421.08	241.1	422.083	C12H23O14P	[M-H]-	Trehalose 6-phosphate	4484-88-2	145220	44380	45463	59628	73874	76387	64665	77699	83357	ko00500,ko01100,ko01110
pme2117	426	159	427.029	C10H15N5O10P2	[M-H]-	Adenosine 5'-diphosphate	58-64-0	77151	55499	52128	44595	52737	51602	50932	49559	58274	ko00190,ko00195,ko00230,ko00908,ko01100,ko01110
mws2186	435.09	303	434.085	C20H18O11	[M+H]+	Avicularin	572-30-5	14792	15250	31825	21299	8654.5	8919	18343	21856	6524.8	--
mws4183	433.08	300.03	434.085	C20H18O11	[M-H]-	Quercetin-3-O-arabinoside (Guaijaverin)	22255-13-6	21027	12408	19242	15393	9	8670.9	12283	17989	9586.1	--
Lmdp003509	435.09	303.06	434.085	C20H18O11	[M+H]+	Quercetin-3-O-xyloside (Reynoutrin)	549-32-6	25553	22454	33034	39651	8860.5	11630	28414	24236	8883	--
HJN087	433.12	271.06	434.121	C21H22O10	[M-H]-	Naringenin-4'-O-glucoside	-	18600	14801	23903	10617	9	9	13284	13193	6434.2	--
HJN055	435.13	273.08	436.136	C21H24O10	[M-H]-	Dihydrocharcone-4'-O-glucoside	-	6738.2	10511	13512	12544	7798.7	13725	15918	13533	9186.2	--
Lmhp008440	438.26	297.24	437.254	C20H40NO7P	[M+H]+	LysoPE 15:1	-	418580	368200	532280	463950	364480	560890	426000	288050	241350	--
Lmhp008273	438.26	297.24	437.254	C20H40NO7P	[M+H]+	LysoPE 15:1(2n isomer)	-	42291	45170	69849	59938	38374	64524	37736	35667	22988	--
Lmhp009187	440.28	299.26	439.27	C20H42NO7P	[M+H]+	LysoPE 15:0	-	1827000	2487600	2312000	2423100	1868600	2551600	1851700	1546400	1432300	--
Lmhp008885	440.28	299.26	439.27	C20H42NO7P	[M+H]+	LysoPE 15:0(2n isomer)	-	2039800	2092100	2971600	2410000	2146800	2817300	2226200	1569700	1606600	--
pmp001029	446.33	428.3	445.319	C27H43NO4	[M+H]+	Kuroyurinidine	-	1766000	1707800	1351300	1670000	1426400	1939500	1601800	1659100	1735800	--
pmn001338	445.08	283	446.085	C21H18O11	[M-H]-	Rhein-8-O-glucoside	34298-86-7	159430	162120	153290	205380	208720	166450	239170	178680	217660	--
Hmfp002563	448.33	430.33	447.334	C27H45NO4	[M+H]+	Esculeogenin A	-	87198	103850	110090	109970	93773	63467	91512	79374	112790	--
Hmcp002316	449.11	317.06	448.1	C21H20O11	[M+H]+	Isorhamnetin-3-O-arabinoside	-	13950	5639.8	12768	12344	9	8414.5	17177	11924	7235	--
mws0913	447.09	285	448.101	C21H20O11	[M-H]-	Kaempferol-3-O-galactoside (Trifolin)	23627-87-4	247440	199290	299660	242120	137050	95433	201840	326270	150250	ko00944
Xmyp005654	449.11	287.06	448.101	C21H20O11	[M+H]+	Kaempferol-4'-O-glucoside	-	1889500	1329500	2218400	1880000	830990	971370	1694100	1620500	1063900	--
Hmpp003270	449.11	287.05	448.101	C21H20O11	[M+H]+	Luteolin-4'-O-glucoside	6920-38-3	1649200	1213500	2282100	1883000	917120	974720	1594600	1740400	958650	--
mws2209	449.11	287.06	448.101	C21H20O11	[M+H]+	Kaempferol-3-O-glucoside (Astragalin)	480-10-4	1874000	1347200	2340700	2128700	974300	992170	1800100	1723000	1128600	ko00944,ko01110
Lmlp003531	449.11	287.06	448.101	C21H20O11	[M+H]+	Luteolin-3'-O-glucoside	5154-41-6	1768400	1208200	2227900	1942700	858550	898330	1822600	1767000	1129600	--
pme2459	449.11	287.2	448.101	C21H20O11	[M+H]+	Luteolin-7-O-glucoside (Cynaroside)	5373-11-5	113170	68006	68392	69430	63877	88788	113190	75876	65882	ko00944
mws0089	447.09	285.04	448.101	C21H20O11	[M-H]-	Kaempferol-7-O-glucoside	16290-07-6	232330	138270	337250	228560	115030	127770	177710	275890	128520	--
Lmhp008763	452.28	311.26	451.27	C21H42NO7P	[M+H]+	LysoPE 16:1(2n isomer)	-	3716500	5180700	5620500	4706400	3855600	5320300	3722900	3569700	2801700	--
Lmhp009034	452.28	311.26	451.27	C21H42NO7P	[M+H]+	LysoPE 16:1	-	3675800	4505100	4943700	4506800	3725300	5265900	3794100	3692000	2584600	--
Li512113	451.09	391.04	452.095	C20H20O12	[M-H]-	Maleoyl-caffeoylquinic acid	-	123350	112600	123370	146110	86348	123640	117210	125810	108380	--
pmb0876	454.29	313.27	453.286	C21H44NO7P	[M+H]+	LysoPE 16:0	53862-35-4	31879000	23563000	37149000	33995000	30674000	27501000	30659000	25347000	32710000	--
pmd0160	454.29	313.27	453.286	C21H44NO7P	[M+H]+	LysoPE 16:0(2n isomer)	-	4942600	2175400	2268400	2154800	2003600	2061000	1747600	1603400	1455100	--
pmn001700	455.35	455.35	456.36	C30H48O3	[M-H]-	24,30-Dihydroxy-12(13)-enolupinol	-	407910	9	9	9	9	9	9	9	9	--
pmb0464	458.1	116.3	457.143	C16H27NO14	[M+H]+	L-Aspartic acid-O-diglucoside	-	1227000	666080	476330	466080	1048800	355510	839790	570380	976680	--
pmb2654	460.1	117.9	461.153	C19H27NO12	[M-H]-	Anthranilate-1-O-Sophoroside	-	233760	86353	138100	62488	106210	94620	66635	136030	133410	--
Lmhn002321	461.07	167.04	462.08	C21H18O12	[M-H]-	Vnilloylcaffeoyltartaric acid	-	23902	20457	29167	47619	27470	20994	21935	26220	20291	--
pmb3012	461.11	299.2	462.116	C22H22O11	[M-H]-	Chrysoeriol-7-O-glucoside	19993-32-9	50525	38565	64992	33714	12177	14734	49763	30332	17786	--
mws0061	463.09	300	464.095	C21H20O12	[M-H]-	Quercetin-3-O-galactoside (Hyperin)	482-36-0	1211100	612420	1669300	758000	193890	385410	1068600	706180	369920	--
mws0091	463.09	300.03	464.095	C21H20O12	[M-H]-	Quercetin-3-O-glucoside (Isoquercitrin)	482-35-9	862200	519880	1059100	568150	139940	346310	763150	557900	299380	ko00944,ko01100,ko01110
Lmdp003286	465.1	303.06	464.095	C21H20O12	[M+H]+	Isohyperoside	35589-21-0	2204500	1428200	3400400	1486900	383400	847010	2129400	1634300	829000	--
pmp001309	465.1	303.1	464.095	C21H20O12	[M+H]+	6-Hydroxykaempferol-7-O-glucoside	-	1938300	1271900	3023100	1276200	375900	839620	2015600	1402000	759400	--
mws0856	463.09	301	464.095	C21H20O12	[M-H]-	Spiraeoside	20229-56-5	646430	461850	940990	481190	146740	322440	653460	485690	256850	--
mws1329	463.09	300.7	464.095	C21H20O12	[M-H]-	Quercetin-7-O-glucoside	491-50-9	585240	434750	857480	419170	128080	201360	492260	432250	221810	--
Lmhp009769	466.29	325.27	465.286	C22H44NO7P	[M+H]+	LysoPE 17:1	-	307760	408710	493000	582220	547140	513410	578600	389510	501400	--
Lmhp009464	466.29	325.27	465.286	C22H44NO7P	[M+H]+	LysoPE 17:1(2n isomer)	-	1452500	1204200	1505300	1476700	1228600	1635900	1144400	942370	855900	--
pmd0130	468.31	184.07	467.301	C22H46NO7P	[M+H]+	LysoPC 14:0	20559-16-4	695330	1862000	2066900	1728800	1570000	1764000	1471700	1510000	1283800	--
Lmhp010162	468.31	327.29	467.301	C22H46NO7P	[M+H]+	LysoPE 17:0	-	597800	437290	548950	606330	478980	468580	502070	368430	336230	--
HJAP154	469.13	317.08	468.069	C23H16O11	[M+H]+	Galloylisorhamnetin*	-	388560	444690	416320	453390	431940	471180	382680	453840	339700	--
Hmmp002121	469.12	317.08	468.113	C23H16O11	[M+H]+	Isorhamnetin-3-O-gallate*	-	424360	351480	434050	432590	384570	396050	386000	396470	304100	--
Hmjn008136	469.33	469.33	470.34	C30H46O4	[M-H]-	Camaldulenic acid	71850-15-2	18208	38783	27426	44166	51221	63037	31981	13656	38656	--
pmn001705	471.35	471.35	472.355	C30H48O4	[M-H]-	3,24-Dihydroxy-17,21-semiacetal-12(13)oleanolic fruit	-	1026000	2318400	3368100	1898500	875620	2357600	1975200	2178800	1803300	--
Zmpn008194	471.35	453.34	472.355	C30H48O4	[M-H]-	Corosolic acid	4547-24-4	6186.4	3865.8	2365.2	13775	7449.8	9626.8	2327.6	5994.6	2708.2	--
mws1610	471.35	471.35	472.355	C30H48O4	[M-H]-	Maslinic acid	4373-41-5	1184600	2639300	3707400	2039800	976530	2342700	2337600	2349000	2097900	--
Lmzn106284	471.35	471.35	472.355	C30H48O4	[M-H]-	Alphitolic acid	19533-92-7	1177300	2531700	3454300	1699600	927580	2575600	2101300	2250800	1891100	--
pmn001706	471.35	471.35	472.355	C30H48O4	[M-H]-	2-Hydroxyoleanolic acid	26707-60-8	1136100	2553800	3319000	1690300	904860	2606400	2163700	2191200	1968700	--
pmb1912	474.17	327	473.166	C20H23N7O7	[M+H]+	10-Formyltetrahydrofuran	2800-34-2	949450	1013100	1193300	1105000	936530	986900	975490	909420	986440	ko00670,ko00970,ko01100,ko01200
Lmhp008233	474.26	333.24	473.254	C23H40NO7P	[M+H]+	LysoPE 18:4	-	3114900	7351100	9070500	7302800	6526100	7937300	6236600	6312200	5896000	--
pmn001727	474.18	312.12	475.184	C24H29NO9	[M-H]-	N-(4-O-(Glucosyl)-E-feruloyl)-tyramine	-	262300	264480	327480	326850	269150	271450	343970	219120	311890	--
Lmhp008589	476.28	335.26	475.27	C23H42NO7P	[M+H]+	LysoPE 18:3(2n isomer)	-	24105000	44244000	47318000	39705000	38148000	41785000	42275000	41150000	38288000	--
Lmhp008801	476.28	335.26	475.27	C23H42NO7P	[M+H]+	LysoPE 18:3	-	24508000	44949000	46128000	39903000	38083000	40958000	41517000	39631000	38472000	--
pmp001181	478.19	162.1	477.179	C27H27NO7	[M+H]+	3-{(2,3-Trans)-2-(4-hydroxy-3-methoxyphenyl)-3-hydroxymethyl-2,3-dihydrobenzo[b][1,4]dioxin-6-yl}-N-(4-hydroxyphenethyl)acrylamide	-	6606.2	15993	19230	13447	5431.8	9507.9	16229	12018	11592	--
pmb0881	478.29	337.27	477.286	C23H44NO7P	[M+H]+	LysoPE 18:2	-	15583000	21456000	25577000	16516000	15435000	11756000	22970000	11651000	20566000	--
pmb0874	478.29	337.27	477.286	C23H44NO7P	[M+H]+	LysoPE 18:2(2n isomer)	-	137130000	127930000	127680000	118160000	125970000	121320000	114370000	109200000	120030000	--
Hmcp002207	479.12	317.06	478.111	C22H22O12	[M+H]+	Isorhamnetin-7-O-glucoside (Brassicin)*	6743-96-0	3581700	2345800	5528400	3196100	1124200	1868500	3732400	3051900	2121100	--
Lmjp003044	479.12	317.06	478.111	C22H22O12	[M+H]+	Isorhamnetin-3-O-Glucoside*	5041-82-7	3613100	2145600	5231400	3054000	1220100	1830400	3401700	2890200	2133300	--
Lmyp004444	479.12	317.06	478.111	C22H22O12	[M+H]+	Tricin-4'-methylether-3'-O-glucoside	-	3474800	2554900	5723600	3084200	1103200	1683300	3295800	3238200	2014500	--
Lmjp003295	479.12	317.07	478.111	C22H22O12	[M+H]+	6-Methoxykaempferol-3-O-glucoside	63422-27-5	3444200	2600500	5259900	2973500	1191300	1822600	3380300	2876200	1941900	--
Lmjp002906	479.12	317.07	478.111	C22H22O12	[M+H]+	Rhamnetin-3-O-Glucoside	27875-34-9	3836700	2326200	5204400	3172200	1124500	1730800	3319100	3106800	2069500	--
Zmhn003046	477.14	337.09	478.147	C23H26O11	[M-H]-	4-O-(6'-O-Glucosylferuloyl)-3,4-dihydroxybenzyl alcohol	-	45367	37766	42691	70076	43598	34329	50562	43580	43926	--
pmb2260	480.31	184.07	479.301	C23H46NO7P	[M+H]+	LysoPC 15:1	-	490570	1007200	1132100	1102700	876560	1153100	857740	847300	766220	--
mws0289	480.31	339.29	479.301	C23H46NO7P	[M+H]+	LysoPE 18:1	89576-29-4	12371000	20262000	19856000	20163000	18680000	25444000	12641000	16189000	12809000	--
pmb0856	480.31	339.29	479.301	C23H46NO7P	[M+H]+	LysoPE 18:1(2n isomer)	-	14224000	23567000	22540000	22029000	21407000	28201000	14049000	18502000	14347000	--
pmb0883	482.32	341.31	481.317	C23H48NO7P	[M+H]+	LysoPE 18:0	69747-55-3	4703600	4068100	6966000	7463600	4288800	4420300	4676900	3334100	4352500	--
Lmhp009129	482.32	184.07	481.317	C23H48NO7P	[M+H]+	LysoPC 15:0(2n isomer)	-	20704000	43058000	48654000	56601000	47767000	54174000	35878000	36687000	33437000	--
pmb2319	482.32	184.07	481.317	C23H48NO7P	[M+H]+	LysoPC 15:0	108273-89-8	5242600	17217000	18216000	17314000	14151000	17334000	11547000	12866000	9926600	--
pmb0880	482.32	341.31	481.317	C23H48NO7P	[M+H]+	LysoPE 18:0(2n isomer)	-	105730	194250	183110	187600	164520	234420	110190	149830	105900	--
HJN104	481.14	319.08	482.105	C21H22O13	[M-H]-	Dihydromyricetin-3-O-glucoside	-	26594	36555	35425	30515	30336	23519	34056	19411	13333	--
pmb3066	481.14	319.2	482.142	C22H26O12	[M-H]-	5-O-p-Coumaroylshikimic acid O-glucoside*	-	9	5475.8	7394.8	9	5354.7	9	12804	9046.9	9	--
pmb3072	481.14	319.3	482.142	C22H26O12	[M-H]-	3-O-p-Coumaroylshikimic acid O-glucoside*	-	28651	33429	37778	37209	28516	35795	24687	31694	38158	--
Hmyn007168	483.27	255.23	484.278	C22H45O9P	[M-H]-	LysoPG 16:0	-	2496800	1257900	2121400	2580400	2164700	1508400	2101000	2133100	1736900	--
Lmmn000214	487.17	341.11	488.174	C18H32O15	[M-H]-	Solatriose	528-40-5	172510	88635	120470	87013	156760	69393	116690	119320	176610	--
Hmjn003948	487.35	487.35	488.35	C30H48O5	[M-H]-	Madasiatic acid	26532-66-1	1124200	1841300	2556400	1015000	554050	1254400	1755300	1612000	1153100	--
Lmmn003398	489.11	285.04	490.111	C23H22O12	[M-H]-	Kaempferol-3-O-(6''-acetyl)glucoside	-	5609.8	9	9	9	9	9	9	9	9	--
pmb0863	492.31	184.07	491.301	C24H46NO7P	[M+H]+	LysoPC 16:2(2n isomer)	-	2970200	8747700	10234000	8743100	7182100	8920500	8298000	7527500	6856500	--
pmb0790	494.19	332.5	493.18	C20H31NO13	[M+H]+	Pyridoxine-5'-O-diglucoside	-	8530.9	4151.6	8186.7	8295.8	9346.5	6415.7	11580	7151.1	7054.6	--
Lmhp008833	494.32	184.07	493.317	C24H48NO7P	[M+H]+	LysoPC 16:1(2n isomer)	-	11824000	32776000	34878000	33741000	25346000	32229000	31064000	27065000	25807000	--
pmp001270	494.32	184.07	493.317	C24H48NO7P	[M+H]+	LysoPC 16:1	76790-27-7	21048000	54300000	57893000	51393000	42973000	52759000	43355000	43155000	37753000	--
pmb0855	496.34	184.07	495.332	C24H50NO7P	[M+H]+	LysoPC 16:0	17364-16-8	59212000	65232000	66583000	65287000	68518000	68100000	67750000	70325000	77394000	--
pmd0132	496.34	184.07	495.332	C24H50NO7P	[M+H]+	LysoPC 16:0(2n isomer)	-	55058000	75456000	77257000	76236000	69737000	75583000	69372000	66945000	59871000	--
Lmgp003989	499.13	163.04	498.116	C25H22O11	[M+H]+	Dicaffeoylshikimic acid	-	156390	136180	125150	123210	43784	98373	183300	173380	152860	--
Lmhp008688	500.28	359.26	499.27	C25H42NO7P	[M+H]+	LysoPE 20:5	-	189960	199020	62620	35721	23755	28372	25476	9236.8	9729.2	--
Lmhp009349	502.29	361.27	501.286	C25H44NO7P	[M+H]+	LysoPE 20:4(2n isomer)	-	299070	116170	29751	13349	9	24443	34808	27968	26044	--
Zmhn003076	503.12	341.09	504.127	C24H24O12	[M-H]-	((2R,3R,5R,6R)-6-(((E)-3-(3,4-dihydroxyphenyl)acryloyl)oxy)-3,4,5-trihydroxytetrahydro-2H-pyran-2-yl)methyl (Z)-3-(3,4-dihydroxyphenyl)acrylate	-	172760	167450	164560	138310	177980	185720	149940	93522	122800	--
mws1589	503.16	179	504.169	C18H32O16	[M-H]-	D-Panose	33401-87-5	42087	25148	20724	29764	54110	40980	51211	40772	53647	--
pme0500	503.16	323	504.169	C18H32O16	[M-H]-	D-(+)-Melezitose	597-12-6	32847	48107	33214	28619	40449	44940	36186	35087	58581	--
pme2125	503.44	179	504.169	C18H32O16	[M-H]-	Raffinose	512-69-6	198710	191070	90684	103750	140450	70387	127940	189930	235650	ko00052,ko01100,ko02010
Lmhp008718	506.32	184.07	505.317	C25H48NO7P	[M+H]+	LysoPC 17:2	-	4634900	14087000	15667000	13314000	10465000	13359000	13579000	12400000	10939000	--
Lmhp010757	506.32	365.31	505.317	C25H48NO7P	[M+H]+	LysoPE 20:2	-	89423	158300	171140	227250	181200	178660	196460	152210	159410	--
Lmhp010514	506.32	365.31	505.317	C25H48NO7P	[M+H]+	LysoPE 20:2(2n isomer)	-	397000	797800	839410	709050	601600	724210	621030	589420	515330	--
pmb0803	508.18	152.4	507.174	C24H29NO11	[M+H]+	Pyridoxine-5'-O-(6''-feruloyl)glucoside	-	21499	24148	24588	22876	24233	15372	25884	13174	23334	--
Lmhp009590	508.34	184.07	507.332	C25H50NO7P	[M+H]+	LysoPC 17:1	-	4134800	10356000	10830000	8558900	7544200	9214700	7719100	8122700	7373000	--
Lmhp010515	510.36	184.07	509.348	C25H52NO7P	[M+H]+	LysoPC 17:0(2n isomer)	-	45916000	76805000	80224000	83082000	74013000	83921000	67953000	65968000	61268000	--
pmb2406	510.36	184.07	509.348	C25H52NO7P	[M+H]+	LysoPC 17:0	50930-23-9	34227000	62246000	67336000	72013000	57819000	71229000	54380000	53083000	46367000	--
Lmgp004518	531.15	177.05	512.132	C26H24O11	[M+H]+	Caffeoylferuloylshikimic acid	-	88186	71930	77658	66518	39187	48480	74927	48103	47967	--
pmb3055	513.1	191.1	514.132	C22H26O14	[M-H]-	p-Coumaroylquinic acid-4'-O-glucuronide	-	35512	24405	38665	37148	37574	36705	40866	25239	32198	--
Lmhp009773	515.32	261.22	514.314	C27H46O9	[M+H]+	1-α-Linolenoyl-glycerol-3-O-glucoside	-	103250	181240	155970	286600	262300	231910	312250	209940	244860	--
Lmhp009526	515.32	261.22	514.314	C27H46O9	[M+H]+	2-α-Linolenoyl-glycerol-1-O-glucoside	-	80126	159510	168920	170380	137880	188340	152450	145400	150050	--
Hmqp006235	516.3	184.07	515.297	C21H46N3O9P	[M+H]+	LysoPC 18:4	-	22227000	62426000	71389000	65320000	57787000	66528000	58945000	57488000	54696000	--
pmn001382	515.12	353.09	516.127	C25H24O12	[M-H]-	Isochlorogenic acid A	2450-53-5	279130	226580	106580	114160	48222	54477	240010	132380	198770	--
pmn001384	515.12	353.09	516.127	C25H24O12	[M-H]-	Isochlorogenic acid C	57378-72-0	332540	242640	135260	63862	220060	147640	138210	250650	104890	--
Wmzn002116	515.12	353.09	516.127	C25H24O12	[M-H]-	3,5-Dicaffeoylquinic acid	-	40247	30778	28783	27591	14600	20008	44012	35095	42775	--
mws1584	515.12	191	516.127	C25H24O12	[M-H]-	1,3-O-Dicaffeoylquinic Acid (Cynarin)	30964-13-7	209530	255310	263060	134040	86957	147520	343190	324360	399730	--
Li512115	515.12	353.09	516.127	C25H24O12	[M-H]-	Isochlorogenic acid B	14534-61-3	1199900	801460	649360	983700	389860	571790	1154900	850200	702340	--
Lmhp010334	517.34	263.24	516.33	C27H48O9	[M+H]+	2-Linoleoylglycerol-1-O-glucoside	-	168120	381640	337530	283050	318100	320940	365510	253440	299150	--
Lmhp010573	517.34	263.24	516.33	C27H48O9	[M+H]+	1-Linoleoylglycerol-3-O-glucoside	-	54138	160230	146340	178440	165280	132790	251540	123910	200370	--
pmb0854	518.32	184.07	517.317	C26H48NO7P	[M+H]+	LysoPC 18:3	-	7811700	23182000	31088000	24758000	18517000	25643000	19872000	19573000	17437000	--
pmb0865	518.32	184.07	517.317	C26H48NO7P	[M+H]+	LysoPC 18:3(2n isomer)	-	109330000	152830000	124610000	153670000	148940000	148470000	155430000	142500000	153440000	--
pmp000702	536.19	195.06	518.137	C22H30O14	[M+NH4]+	3'-O-D-glucosylgentiopicroside	-	462770	442100	626000	420290	544770	581040	493480	454900	440740	--
Hmbn002692	517.16	175.04	518.164	C22H30O14	[M-H]-	6'-O-Feruloyl-D-sucrose	118230-77-6	282070	323500	385530	199300	295800	152370	362070	248040	461070	--
pmn001458	517.16	175	518.164	C22H30O14	[M-H]-	Sibiricose A5	107912-97-0	327190	338060	434780	262820	308640	263290	403910	485440	482210	--
pmp001251	520.34	184.07	519.332	C26H50NO7P	[M+H]+	LysoPC 18:2(2n isomer)	-	12888000	13748000	15043000	12567000	12386000	14670000	12619000	12369000	11922000	--
Li512111	519.11	315.05	520.122	C24H24O13	[M-H]-	Isorhamnetin-3-O-(6''-acetylglucoside)	-	9601.8	6711.6	9	9	3562.5	4354.5	9	6255.7	9	--
pmn001378	519.19	357.14	520.194	C26H32O11	[M-H]-	Pinoresinol-4-O-glucoside	41607-20-9	551300	513990	698360	546210	724960	593990	596170	526050	497010	--
pmp001281	522.36	184.07	521.348	C26H52NO7P	[M+H]+	LysoPC 18:1	-	174960000	232340000	232620000	240940000	223790000	242240000	220400000	224040000	216770000	--
pmn001710	521.13	359.08	522.137	C24H26O13	[M-H]-	Rosmarinic acid-3'-O-glucoside	910028-78-3	25898	45051	47108	45411	35488	37006	52747	39527	24060	--
HJN083	521.2	359.15	522.211	C26H34O11	[M-H]-	Lariciresinol-4'-O-glucoside	143663-00-7	23487	49145	49293	39595	39925	31882	35762	36406	43960	--
mws0126	524.37	184.07	523.364	C26H54NO7P	[M+H]+	LysoPC 18:0	19420-57-6	28477000	39007000	53553000	48875000	48434000	43811000	56291000	32348000	49894000	--
Lmtn003096	523.21	361.14	524.226	C26H36O11	[M-H]-	(-)-Secoisolariciresinol 4-O-glucoside	-	177220	197980	206280	131260	196070	188720	319240	240320	362990	--
Lmjp003822	531.15	177.06	530.142	C26H26O12	[M+H]+	3,5-Dicaffeoylquinic Acid Methyl Ester	159934-13-1	77076	76219	65804	82108	40460	53678	93073	68160	72186	--
Lmbn001181	531.14	531.13	532.143	C22H28O15	[M-H]-	Fraxetin-7,8-di-O-glucoside	-	134500	95922	125680	93269	81017	118530	153030	108470	94305	--
Lmhp007598	534.36	184.07	533.348	C27H52NO7P	[M+H]+	LysoPC 19:2(2n isomer)	-	2834900	6465800	6894200	5580600	6270200	7059800	4351800	6020900	4011100	--
Lmhp007840	534.36	184.07	533.348	C27H52NO7P	[M+H]+	LysoPC 19:2	-	1354300	3220200	3380700	2881700	2981600	3389600	2264600	2575200	1811400	--
Lmdp004892	535.11	287.05	534.101	C24H22O14	[M+H]+	Kaempferol-3-O-(6''-malonyl)galactoside	-	14393	9552	8925.5	9	6393.2	8724	9	10464	10517	--
Lmmp003817	535.11	287.05	534.101	C24H22O14	[M+H]+	Kaempferol-3-O-(6''-malonyl)glucoside	-	17990	9	9	9	9	9163	9	9	9	--
Lmhp010908	536.37	184.07	535.364	C27H54NO7P	[M+H]+	LysoPC 19:1	-	26763000	71239000	93068000	73307000	63528000	98519000	62275000	72733000	55113000	--
Zmfn000481	535.04	323.03	536.044	C14H22N2O16P2	[M-H]-	Uridine-5'-Diphosphate-D-Xylose	3616-06-6	282160	311310	247320	260970	331250	267530	365550	310400	335890	ko00520,ko00908,ko01100
pmb0824	537.1	177.4	536.153	C25H28O13	[M+H]+	Syringic acid-4-O-(6''-feruloyl)glucoside	-	10521	8956.3	8764.8	4200	10326	7453.5	10351	13754	7324.8	--
Hmln002100	535.18	373.13	536.189	C26H32O12	[M-H]-	Nortrachelogenin-4-O-glucoside	33464-78-7	39575	34715	44412	47474	55713	55609	44768	50711	22414	--
pmb2228	538.39	184.07	537.379	C27H56NO7P	[M+H]+	LysoPC 19:0	108273-88-7	114350	234280	246800	259710	230690	307700	161310	248640	162190	--
Lmdn001925	537.2	375.15	538.205	C26H34O12	[M-H]-	Olivil-4'-O-glucoside	76880-93-8	52478	67531	64032	55374	60270	82694	62131	53674	65724	--
pmp001274	542.32	483.25	541.317	C28H48NO7P	[M+H]+	2-Hydroxy-5,8,11,14,17-icosapentaenoyloxy]propyl-2-(trimethylammonio)ethyl phosphate	-	36812000	42676000	44137000	43278000	41535000	41698000	42179000	40831000	42135000	--
Lmhp009890	546.36	184.07	545.348	C28H52NO7P	[M+H]+	LysoPC 20:3	1199257-41-4	20484000	28505000	4613700	2791900	2744900	1810000	1701800	1482200	794740	--
pmn001671	547.17	223.1	548.174	C23H32O15	[M-H]-	Furanofructosyl-α-D-(6-mustard acyl)glucoside	-	25227	26374	20805	22986	9980.6	15504	34122	22768	42038	--
pmn001459	547.17	205.1	548.174	C23H32O15	[M-H]-	Sibiricose A6	241125-75-7	16417	17720	17318	17253	10476	9402.8	18514	18554	21402	--
Lmhp011549	550.39	184.07	549.379	C28H56NO7P	[M+H]+	LysoPC 20:1	-	3343300	11014000	9678000	8345500	8539100	9912900	6764000	6616500	5684900	--
pmp000589	551.1	303.05	550.096	C24H22O15	[M+H]+	Quercetin-7-O-(6''-malonyl)glucoside	-	8485.2	9	9	2940	9	6941.5	9	4042.5	9	--
pmn001371	549.2	387.15	550.205	C27H34O12	[M-H]-	Eucommin A	99633-12-2	60029	64730	92333	73370	55737	74090	62039	66066	56550	--
Lmmn002260	551.21	389.17	552.221	C27H36O12	[M-H]-	5'-Methoxyisolariciresinol-9'-O-glucoside	-	1353500	1342700	1334300	1194800	1624300	1597600	1451900	1248100	965340	--
Lmhn003802	561.13	337.06	562.132	C26H26O14	[M-H]-	Sinapoylsinapoyltartaric acid	-	5198.5	7495	9	7018.8	9	9	10589	5826.6	11835	--
HJAP064	565.12	317.08	564.088	C25H24O15	[M+H]+	Isorhamnetin-3-O-(6''-malonylglucoside)	-	28012	24784	18332	6649.8	9	16053	13270	9655	3310.5	--
Zmhp005139	565.12	317.07	564.112	C25H24O15	[M+H]+	Tamarixetin-3-O-(6''-malonyl)glucoside	-	42494	24864	9979.2	13347	9	9353.2	12704	11642	8791.2	--
pmb2922	565.05	323.1	566.055	C15H24N2O17P2	[M-H]-	Uridine 5'-diphospho-D-glucose	133-89-1	4422600	4601300	4590900	4048600	4037200	3505400	4382300	3197400	4481000	ko00040,ko00052,ko00053,ko00240,ko00500,ko00520,ko00561,ko00908,ko01100,ko01110
Lmhp010394	572.37	184.07	571.364	C30H54NO7P	[M+H]+	LysoPC 22:4	-	57703	110530	71310	117900	59445	124550	42567	47021	17450	--
Hmfp003025	576.38	558.36	575.381	C33H53NO7	[M+H]+	Solasodine-3-O-glucoside	-	39776	7575.4	45545	58234	45882	9	29724	9	67013	--
Hmdp003400	577.37	271.21	576.357	C33H52O8	[M+H]+	Trillin (Diosgenin-3-O-glucoside)	14144-06-0	12684000	13490000	11631000	12517000	12764000	12146000	10887000	10037000	11313000	--
Hmfp003075	578.39	560.39	577.397	C33H55NO7	[M+H]+	Tomatidine-3-O-glucoside	-	158420	132120	118330	112270	210570	137090	138910	203140	149850	--
HJAP148	581.15	287.06	580.142	C26H28O15	[M+H]+	Kaempferol-3-O-sambubioside	27661-51-4	6653.2	9	9	9	9	4387.5	9	9	9	--
Hmfp002517	594.39	576.39	593.392	C33H55NO8	[M+H]+	Esculeogenin A-27-O-rhamnoside	-	280550	391500	411410	260640	1176900	639970	463460	316720	273490	--
Hmbp001825	597.15	303.05	596.138	C26H28O16	[M+H]+	Quercetin-3-O-sambubioside	83048-35-5	9	9	5770	9	9	9	7848.8	9	9	--
Lmtp004044	597.14	303.04	596.138	C26H28O16	[M+H]+	Quercetin-3-O-apiosyl(1→2)galactoside	-	8578	6311	9384.2	7784.5	9	9	9	9	9	--
Lmjp002596	597.14	303.05	596.138	C26H28O16	[M+H]+	Quercetin-3-O-xylosyl(1→2)glucoside	-	6757.5	4724.5	13400	3903.8	4697.2	9	9	9	9	ko00944
Hmfp002478	610.38	592.38	609.386	C33H55NO9	[M+H]+	Esculeogenin B-O-glucoside	-	72172	97003	78467	79153	62488	39132	53658	58677	59701	--
Hmfp002048	610.39	592.39	609.387	C33H55NO9	[M+H]+	Esculeogenin A-27-O-glucoside	1082948-39-7	330860	282640	299690	342800	292320	367190	365510	223640	361590	--
Hmfp002251	610.38	592.38	609.387	C33H55NO9	[M+H]+	Esculeogenin B1-O-glucoside	-	174470	157170	114720	108670	147190	141990	106470	130560	145200	--
Lmmp000897	611.14	287.05	610.132	C30H26O14	[M+H]+	Gallocatechin-Gallocatechin	-	119720	89899	155740	104910	35815	56560	102670	92842	77347	--
Xmyp005599	611.16	287.06	610.153	C27H30O16	[M+H]+	Kaempferol-3-O-galactoside-4'-O-glucoside	-	11000	9	15786	9	9	14882	9492.5	9	3951.5	--
Hmpp002612	611.16	287.05	610.153	C27H30O16	[M+H]+	Luteolin-7-O-gentiobioside	-	460580	299820	549800	153160	94690	273170	320760	271990	187140	--
Lmbp002592	611.16	287.05	610.153	C27H30O16	[M+H]+	Kaempferol-3,7-di-O-glucoside	-	100460	80242	126470	82392	40668	39618	73424	84045	47678	--
Lmjp002461	611.16	303.05	610.153	C27H30O16	[M+H]+	Quercetin-3-O-neohesperidoside	117611-67-3	7174.5	9	9657	8791.2	19826	13690	6392.5	8851.5	7218.2	--
HJAP024	611.16	593.15	610.154	C27H30O16	[M+H]+	Kaempferol-6,8-di-C-glucoside	-	46276	47710	43058	53873	48385	52560	59555	44010	64163	--
Zmhn002032	609.18	447.13	610.189	C28H34O15	[M-H]-	4-O-(6'-O-Glucosylcaffeoylglucosyl)-4-hydroxybenzyl alcohol	-	22868	14885	34418	21070	8985.2	12479	24141	26136	13192	--
mws4134	611.14	306.08	612.152	C20H32N6O12S2	[M-H]-	Oxiglutatione	27025-41-8	406560	41414	34656	36674	59165	33536	41797	39226	34446	ko00480,ko01100
Hmjp002999	625.17	317.08	624.162	C28H32O16	[M+H]+	Isorhamnetin-3-O-rutinoside (Narcissin)	604-80-8	5913.2	4446.5	7435.5	3328	4437.2	16938	9	5185.2	9	--
pmp001187	625.25	460.2	624.247	C36H36N2O8	[M+H]+	1-(Dihydroxyphenyl)-N2,N3-bis(4-hydroxyphenethyl)-(5-8)-dimethoxy-1,2dihydronaphthalene-2,3-dicarboxamide	-	233300	298770	859570	325190	207290	319560	378790	207120	276490	--
pmp001253	625.25	488.17	624.247	C36H36N2O8	[M+H]+	Cannabisin F	163136-19-4	548560	623200	2112600	769060	524810	664200	865020	501810	524330	--
HJN016	623.24	460.18	624.247	C36H36N2O8	[M-H]-	Cannabisin D	-	689000	814360	2404700	1115200	668760	893950	1001300	612780	655960	--
pmp001254	625.25	488.17	624.247	C36H36N2O8	[M+H]+	Grossamide	80510-06-1	1308000	1686200	6084900	1966500	1350200	1867900	2448800	1272600	1807000	--
pmp001310	627.16	303.1	626.148	C27H30O17	[M+H]+	6-Hydroxykaempferol-3,6-O-Diglucoside	-	438010	245520	628010	186460	58079	203310	319020	232000	98275	--
pma2088	627.16	465	626.148	C27H30O17	[M+H]+	Quercetin-3,4'-O-di-glucoside	29125-80-2	9765.3	16148	15775	15445	12425	11435	15618	16865	10427	--
pmp001311	627.16	303.1	626.148	C27H30O17	[M+H]+	6-Hydroxykaempferol-7,6-O-Diglucoside	-	80027	58814	133270	36374	9419.9	19883	66109	58801	26157	--
Lmtp003677	627.16	303.04	626.148	C27H30O17	[M+H]+	Quercetin-3-O-sophoroside (Baimaside)	18609-17-1	514130	190910	712440	129140	59199	310700	307710	265020	137380	ko00944
Hmcp001578	641.17	479.11	640.163	C28H32O17	[M+H]+	Isorhamnetin-3,7-O-diglucoside	6758-51-6	100280	65637	106230	49746	17140	49467	74684	64843	36061	--
pmp001190	655.27	518.2	654.258	C37H38N2O9	[M+H]+	(5-8)-Hydroxy-1-(hydroxylmethoxyphenyl)-N2,N3-bis(4-hydroxyphenethyl)-(5-8)-dimethoxy-1,2-dihydronaphthalene-2,3-dicarboxamide	-	31334	32860	313740	35786	21174	61844	93889	25914	97463	--
pmb0530	664.12	136.2	663.109	C21H27N7O14P2	[M+H]+	Nicotinic acid adenine dinucleotide	53-84-9	101690	161980	145950	164950	170890	135190	178380	133600	162030	ko00190,ko00730,ko00760,ko01100
Lmhp008744	677.37	261.22	676.367	C33H56O14	[M+H]+	1-α-Linolenoyl-glycerol-2,3-di-O-glucoside	-	52518	117580	64713	85176	95259	100490	76541	62823	117290	--
Lmhp008513	677.37	261.22	676.367	C33H56O14	[M+H]+	2-α-Linolenoyl-glycerol-1,3-di-O-glucoside	-	248090	435590	397890	359270	420080	401640	375660	326870	479650	--
pmp001271	679.39	263.24	678.383	C33H58O14	[M+H]+	1-Linoleoyl-sn-glycerol-diglucoside	-	599580	1084600	1073500	836480	818400	1002700	770760	858010	706440	--
Lmhp009190	679.39	263.24	678.383	C33H58O14	[M+H]+	2-Linoleoylglycerol-1,3-di-O-glucoside	-	753020	1220200	1088000	821040	799350	1002600	789500	839850	675930	--
Lmhp009384	679.39	263.24	678.383	C33H58O14	[M+H]+	1-Linoleoylglycerol-2,3-di-O-glucoside	-	892810	958750	1021600	1105100	905790	884240	910300	907270	848110	--
pmn001370	681.24	519.19	682.247	C32H42O16	[M-H]-	Pinoresinol-4,4'-O-di-O-glucoside	63902-38-5	75950	66427	103570	102710	76089	87007	64005	99337	70479	--
pmp001189	685.28	548.2	684.268	C38H40N2O10	[M+H]+	(5-8)-Hydroxy-1-(hydroxyldimethoxyphenyl)-N2,N3-bis(4-hydroxyphenethyl)-(5-8)-dimethoxy-1,2-dihydronaphthalene-2,3-dicarboxamide	-	5035.6	7078.4	30354	9041.5	3983.5	22092	7771	5903.4	20145	--
Lmjn003562	693.2	175.04	694.211	C32H38O17	[M-H]-	3,6'-Diferuloylsucrose	107172-40-7	13910	9130	15865	12179	13350	12498	13926	15325	7196.8	--
Lmgn002253	695.2	353.09	696.19	C31H36O18	[M-H]-	Syringoylcaffeoylquinic acid-D-glucose	-	803110	867350	930590	799730	1067000	932930	801410	913390	997670	--
Zmrp003090	722.44	414.34	721.44	C39H63NO11	[M+H]+	Solasodine-3-O-(2''-xyloyl)glucoside	-	131740	183070	176780	287720	130280	273440	234520	217990	217130	--
Lmmp004831	722.45	722.45	721.44	C39H63NO11	[M+H]+	Khasianine	32449-98-2	72285000	83391000	85724000	85109000	68272000	83363000	75870000	75122000	75270000	--
Lmgn004359	721.18	353.09	722.206	C33H38O18	[M-H]-	SinapoylcaffeoylQuinic acid O-glucose	-	14294	9778.5	9753.6	8198.3	8481.4	7448.9	9193.9	5448.9	9	--
pmp000751	723.43	579.3	722.424	C39H62O12	[M+H]+	Yamogenin-3-O-Neohesperidoside	110996-52-6	49737	61021	58979	104990	89187	100800	56085	67350	69348	--
Zmrp003047	738.43	414.34	737.434	C39H63NO12	[M+H]+	Solasodine-3-O-sophoroside	-	8589.2	21304	11034	18667	11006	24545	15084	16529	35642	--
Lmfp004911	740.46	740.46	739.451	C39H65NO12	[M+H]+	γ-Tomatine	81037-16-3	1124400	1373100	1297700	2185000	1352500	1532700	1397200	1108100	1241500	--
pme2651	742.1	620.1	743.075	C21H28N7O17P3	[M-H]-	NADP (Nicotinamide adenine dinucleotide phosphate)	53-59-8	65200	114960	136390	140770	77672	96016	143090	112290	104610	ko00195,ko00480,ko00760,ko01100
pmn001505	763.43	763.4	764.435	C41H64O13	[M-H]-	Oleanolic acid-3-O-xylosyl(1→3)glucuronide	-	28523	23633	44836	32343	47008	47462	42869	20550	30505	--
Lmqp002170	773.21	449.11	772.206	C33H40O21	[M+H]+	Kaempferol-3-O-sophorotrioside	80714-53-0	13614	18147	22883	8550.5	6054	9581.9	12401	9600	4990.8	ko00944
pmp001312	789.21	303.1	788.201	C33H40O22	[M+H]+	6-Hydroxykaempferol-3,7,6-O-triglycoside	-	17394	16730	29883	5434.3	9	21156	15207	10074	9	--
Hmcp001489	803.23	317.06	802.216	C34H42O22	[M+H]+	Isorhamnetin-3-O-(2''-O-glucosyl)galactoside-7-O-glucoside	-	8541.4	19485	7653.6	13459	7517.6	20763	7924.6	11393	11981	--
Hmqp004681	868.5	868.5	867.492	C45H73NO15	[M+H]+	(22R, 25R)-16b-H-22a-N-spirosol-3β-ol-5-ene 3-O-a-L-rhamnopyranosyl- (1→ 2)-[a-L-rhamnopyranosyl-(1→4)]-b-D-glucopyranoside	-	33878000	36896000	43182000	47095000	35962000	43103000	36050000	36485000	35819000	--
Lmmp003705	868.51	868.51	867.498	C45H73NO15	[M+H]+	Leptinine I	-	20793000	29205000	24390000	31769000	25972000	25090000	30515000	23930000	29262000	--
mws1307	866.49	866.49	867.498	C45H73NO15	[M-H]-	α-Solanine	20562-02-1	367080	391830	324040	382540	156460	383400	169820	172260	271490	--
Hmmp002627	884.5	884.5	883.492	C45H73NO16	[M+H]+	α-Solasonine	19121-58-5	52107000	62855000	51760000	80496000	53175000	64565000	68157000	51488000	61174000	--
pmp001174	897.39	486.2	896.382	C44H52N10O11	[M+H]+	Lyciumin B	125756-66-3	3521700	3304400	2749100	2883900	3288300	2771000	3000800	2827700	3277000	--
Hmqn007358	899.47	737.41	900.477	C45H72O18	[M+H]+	26-O-(β-D-glucopyranosyl) nuatigenin 3-O-a-L-rhamnopyranosyl-(1→ 4)- b-D-glucopyranoside	-	19147	24410	25245	23204	17055	17649	24138	18717	20933	--
Lmmp004809	902.51	902.51	901.503	C45H75NO17	[M+H]+	β1-Tomatine	17406-46-1	1648300	1846400	1568300	1542300	1623200	1403300	1495600	1514800	1826000	--
Lmmp005557	910.52	910.52	909.509	C47H75NO16	[M+H]+	Leptine I	101030-83-5	126110	111300	118000	142610	101980	134230	100280	120290	153300	--
Lmfp005484	1018.56	1018.56	1017.55	C50H83NO20	[M+H]+	Demissine	6077-69-6	13811000	12148000	16784000	8326700	12295000	11286000	12863000	10383000	20901000	--
mws1308	1034.55	1034.55	1033.55	C50H83NO21	[M+H]+	Tomatine	17406-45-0	11078000	11563000	11245000	11234000	9647900	12030000	10809000	9730300	10857000	--
Hmfp002852	1046.55	1046.55	1045.54	C51H83NO21	[M+H]+	Tomatidine-3-O-(6''-acetyl)glucosyl-(1→2)-[arabinosyl-(1→3)]glucosyl-(1→4)arabinoside	-	1953800	2140400	1725500	3332500	1926100	2131100	2129700	2283000	1822400	--
Lmfp004629	1046.55	1046.55	1045.55	C51H83NO21	[M+H]+	Dehydrocommersonine	65428-74-2	1290900	1871700	1695700	2447300	1481300	1713200	2183600	2045400	1862600	--
Hmqp005575	1047.52	415.32	1046.52	C51H82O22	[M-H]-	Aculeatiside A	86848-73-9	8990900	9205700	9269700	10812000	6918000	10449000	9431100	9047300	9753500	--
Hmfp003206	1048.56	1048.56	1047.56	C51H85NO21	[M+H]+	Tomatidine-3-O-glucosyl-(1→2)-[rhamnosyl-(1→3)]glucosyl-(1→4)glucoside	-	43249000	46080000	43308000	47833000	39109000	42207000	43540000	41824000	46122000	--
