# Supplementary material for: Transcriptome and metabolome response of eggplant against Ralstonia solanacearum infection
Source: PeerJ. 2023 Jan 11;11:e14658. doi: 10.7717/peerj.14658 (PMC9840387; doi:10.7717/peerj.14658)
Supplement: Supplemental Information 8 [file peerj-11-14658-s008.xlsx]

## Sheet: TableS 5
Table S5 The Differential metabolites of of eggplant after inoculation the R.solanacearum in R-0h _Vs_R-24h.
Index	Formula	Compounds	Class I	Class II	CAS	Level	R0h-1	R0h-2	R0h-3	R24h-1	R24h-2	R24h-3	VIP	Fold_Change	Log2FC	Type
mws0208	C6H10O4	Adipic Acid	Organic acids	Organic acids	124-04-9	B	431740	542380	1061000	282490	337050	300350	1.65657	0.452008	-1.14558	down
mws0924	C6H10O4	2-Methylglutaric acid	Organic acids	Organic acids	617-62-9	B	337570	420170	813820	236530	264030	229300	1.65643	0.464418	-1.10651	down
Lmbn001754	C7H12O5	3-Isopropylmalic Acid*	Organic acids	Organic acids	921-28-8	B	3355500	2200700	2534500	7766500	4063700	7483600	1.74266	2.38716	1.2553	up
Zmgn001448	C7H12O5	2-Propylmalic Acid*	Organic acids	Organic acids	-	B	3380700	2653300	2969800	9636200	4535500	8639100	1.75602	2.53346	1.34111	up
pmb3101	C7H12O5	2-Isopropylmalic Acid*	Organic acids	Organic acids	49601-06-1	B	4378000	3497600	3887600	10797000	5434800	11006000	1.71985	2.31551	1.21133	up
pmb2640	C12H24O2	Lauric acid	Organic acids	Organic acids	143-07-7	A	8355.2	7695.4	11798	24077	26311	23512	1.96323	2.65363	1.40797	up
pme1654	C12H18O3	Jasmonic acid	Organic acids	Organic acids	77026-92-7	B	30472	48710	161960	225980	155830	224280	1.4943	2.51342	1.32965	up
Lmtn004049	C15H20O4	Abscisic acid	Organic acids	Organic acids	21293-29-8	B	8552.5	6326.2	9	17008	37233	21318	1.30038	5.07526	2.34348	up
Zmyn005026	C18H36O2	16-Methylheptadecanoic acid	Lipids	Free fatty acids	2724-58-5	B	9	9	69139	53625	40606	44372	1.34504	2.00418	1.00301	up
Zmpn003698	C20H34O2	11,14,17-Eicosatrienoic acid	Lipids	Free fatty acids	17046-59-2	A	15720	5152.7	2016.9	916.62	1381.9	1408.4	1.55795	0.161948	-2.6264	down
pmn001689	C18H32O4	9-Hydroxy-12-oxo-15(Z)-octadecenoic acid	Lipids	Free fatty acids	-	B	29702	7339.5	8195.2	5856	9698	5110.3	1.06991	0.456804	-1.13035	down
Lmdp003808	C16H12O7	Azaleatin (5-O-Methylquercetin)	Flavonoids	Flavonols	529-51-1	B	57111	45693	59248	33240	12967	18059	1.83405	0.396576	-1.33433	down
mws0884	C10H12N5O6P	Cyclic 3',5'-Adenylic acid	Nucleotides and derivatives	Nucleotides and derivatives	60-92-4	B	142650	161900	162150	257460	521290	366270	1.88536	2.45344	1.29481	up
HJAP050	C19H21NO5	N-Feruloyl-3-methoxytyramine	Alkaloids	Phenolamine	78510-19-7	A	305150	392840	1754200	281830	256990	290260	1.23295	0.338098	-1.56449	down
mws1546	C16H20O9	Gentiopicroside	Terpenoids	Sesquiterpenoids	20831-76-9	B	39027	27284	31639	16124	8057.8	17677	1.79036	0.427349	-1.22651	down
pmb3107	C15H20O10	Glucosyringic Acid	Phenolic acids	Phenolic acids	-	A	9	9	9	9	10471	6795.1	1.51935	639.819	9.32152	up
Zmhn001970	C20H22O8	Piceid	Others	Stilbene	27208-80-6	B	9	5166.5	47968	9	9	9	1.44173	0.000508058	-10.9427	down
mws4183	C20H18O11	Quercetin-3-O-arabinoside (Guaijaverin)	Flavonoids	Flavonols	22255-13-6	B	21027	12408	19242	15393	9	8670.9	1.0897	0.456991	-1.12976	down
HJN087	C21H22O10	Naringenin-4'-O-glucoside	Flavonoids	Flavonoid	-	B	18600	14801	23903	10617	9	9	1.59787	0.185589	-2.42982	down
pmb3012	C22H22O11	Chrysoeriol-7-O-glucoside	Flavonoids	Flavonoid	19993-32-9	B	50525	38565	64992	33714	12177	14734	1.76314	0.393459	-1.34571	down
mws0061	C21H20O12	Quercetin-3-O-galactoside (Hyperin)	Flavonoids	Flavonols	482-36-0	A	1211100	612420	1669300	758000	193890	385410	1.56535	0.382871	-1.38507	down
mws0091	C21H20O12	Quercetin-3-O-glucoside (Isoquercitrin)	Flavonoids	Flavonols	482-35-9	A	862200	519880	1059100	568150	139940	346310	1.54806	0.431922	-1.21116	down
Lmdp003286	C21H20O12	Isohyperoside	Flavonoids	Flavonols	35589-21-0	A	2204500	1428200	3400400	1486900	383400	847010	1.6017	0.38636	-1.37198	down
pmp001309	C21H20O12	6-Hydroxykaempferol-7-O-glucoside	Flavonoids	Flavonols	-	A	1938300	1271900	3023100	1276200	375900	839620	1.60257	0.399743	-1.32285	down
mws0856	C21H20O12	Spiraeoside	Flavonoids	Flavonols	20229-56-5	A	646430	461850	940990	481190	146740	322440	1.55336	0.46376	-1.10855	down
mws1329	C21H20O12	Quercetin-7-O-glucoside	Flavonoids	Flavonols	491-50-9	A	585240	434750	857480	419170	128080	201360	1.68362	0.398733	-1.3265	down
Zmpn008194	C30H48O4	Corosolic acid	Terpenoids	Triterpene	4547-24-4	B	6186.4	3865.8	2365.2	13775	7449.8	9626.8	1.67797	2.48455	1.31298	up
Lmyp004444	C22H22O12	Tricin-4'-methylether-3'-O-glucoside	Flavonoids	Flavonols	-	A	3474800	2554900	5723600	3084200	1103200	1683300	1.50887	0.499494	-1.00146	down
Lmhp008688	C25H42NO7P	LysoPE 20:5	Lipids	LPE	-	B	189960	199020	62620	35721	23755	28372	1.80379	0.194526	-2.36196	down
Lmhp009349	C25H44NO7P	LysoPE 20:4(2n isomer)	Lipids	LPE	-	B	299070	116170	29751	13349	9	24443	1.32375	0.0849478	-3.55728	down
pmn001382	C25H24O12	Isochlorogenic acid A	Phenolic acids	Phenolic acids	2450-53-5	A	279130	226580	106580	114160	48222	54477	1.64247	0.354177	-1.49746	down
Lmhp009890	C28H52NO7P	LysoPC 20:3	Lipids	LPC	1199257-41-4	A	20484000	28505000	4613700	2791900	2744900	1810000	1.67924	0.13706	-2.86712	down
HJAP064	C25H24O15	Isorhamnetin-3-O-(6''-malonylglucoside)	Flavonoids	Flavonoid	-	B	28012	24784	18332	6649.8	9	16053	1.18129	0.319309	-1.64698	down
Zmhp005139	C25H24O15	Tamarixetin-3-O-(6''-malonyl)glucoside	Flavonoids	Flavonoid	-	B	42494	24864	9979.2	13347	9	9353.2	1.14139	0.293639	-1.76789	down
Lmtp004044	C26H28O16	Quercetin-3-O-apiosyl(1→2)galactoside	Flavonoids	Flavonols	-	B	8578	6311	9384.2	7784.5	9	9	1.52555	0.321445	-1.63736	down
Lmjp002596	C26H28O16	Quercetin-3-O-xylosyl(1→2)glucoside	Flavonoids	Flavonols	-	B	6757.5	4724.5	13400	3903.8	4697.2	9	1.13308	0.346033	-1.53102	down
Hmpp002612	C27H30O16	Luteolin-7-O-gentiobioside	Flavonoids	Flavonoid	-	B	460580	299820	549800	153160	94690	273170	1.69131	0.397664	-1.33038	down
Lmjp002461	C27H30O16	Quercetin-3-O-neohesperidoside	Flavonoids	Flavonols	117611-67-3	B	7174.5	9	9657	8791.2	19826	13690	1.00349	2.51223	1.32897	up
pmp001310	C27H30O17	6-Hydroxykaempferol-3,6-O-Diglucoside	Flavonoids	Flavonols	-	A	438010	245520	628010	186460	58079	203310	1.61866	0.341468	-1.55018	down
pmp001311	C27H30O17	6-Hydroxykaempferol-7,6-O-Diglucoside	Flavonoids	Flavonols	-	B	80027	58814	133270	36374	9419.9	19883	1.81484	0.241361	-2.05074	down
Lmtp003677	C27H30O17	Quercetin-3-O-sophoroside (Baimaside)	Flavonoids	Flavonols	18609-17-1	B	514130	190910	712440	129140	59199	310700	1.42121	0.352061	-1.5061	down
Hmcp001578	C28H32O17	Isorhamnetin-3,7-O-diglucoside	Flavonoids	Flavonols	6758-51-6	A	100280	65637	106230	49746	17140	49467	1.63815	0.427537	-1.22588	down
Lmqp002170	C33H40O21	Kaempferol-3-O-sophorotrioside	Flavonoids	Flavonols	80714-53-0	B	13614	18147	22883	8550.5	6054	9581.9	1.85727	0.442618	-1.17587	down
pmp001312	C33H40O22	6-Hydroxykaempferol-3,7,6-O-triglycoside	Flavonoids	Flavonols	-	B	17394	16730	29883	5434.3	9	21156	1.13505	0.415569	-1.26684	down

## Sheet: TableS 6
Table S5 The Differential metabolites of of eggplant after inoculation the R.solanacearum in R-0h _Vs_R-48h.
Index	Formula	Compounds	Class I	Class II	CAS	Level	R0h-1	R0h-2	R0h-3	R48h-1	R48h-2	R48h-3	VIP	Fold_Change	Log2FC	Type
pme2268	C7H7NO2	Trigonelline	Alkaloids	Alkaloids	535-83-1	B	151160	267610	176200	909560	210740	513490	1.38188	2.746	1.45733	up
mws1155	C6H14O6	Mannitol	Others	Saccharides and Alcohols	69-65-8	B	5966	4291.4	9	8224.8	4573.2	10518	1.09689	2.2711	1.18339	up
mws0014	C10H10O4	Ferulic acid	Phenolic acids	Phenolic acids	537-98-4	A	2334100	516670	491360	448290	443950	375060	1.0659	0.379189	-1.39901	down
mws0362	C17H34O2	Heptadecanoic acid	Lipids	Free fatty acids	506-12-7	A	253730	117120	70381	66678	66434	64065	1.27916	0.446879	-1.16204	down
Zmyn005026	C18H36O2	16-Methylheptadecanoic acid	Lipids	Free fatty acids	2724-58-5	B	9	9	69139	35268	105360	44941	1.34017	2.6833	1.42401	up
mws0369	C20H32O2	Arachidonic Acid	Lipids	Free fatty acids	506-32-1	A	99195	52305	33103	21913	34402	22426	1.44721	0.426542	-1.22924	down
Zmpn003698	C20H34O2	11,14,17-Eicosatrienoic acid	Lipids	Free fatty acids	17046-59-2	A	15720	5152.7	2016.9	997.09	1485	897.18	1.55863	0.147633	-2.75991	down
pme2074	C18H29NO4	(-)-Jasmonoyl-L-Isoleucine	Organic acids	Organic acids	120330-93-0	B	83215	106340	473930	246040	378890	758440	1.18537	2.08501	1.06005	up
mws0983	C20H39NO2	N-Oleoylethanolamine	Alkaloids	Alkaloids	111-58-0	B	267680	83498	272170	60729	72989	81057	1.53	0.344551	-1.53721	down
pmb3107	C15H20O10	Glucosyringic Acid	Phenolic acids	Phenolic acids	-	A	9	9	9	14563	5174.4	7868.3	2.01359	1022.43	9.99779	up
mws0043	C21H22O8	Nobiletin (5,6,7,8,3',4'-Hexamethoxyflavone)	Flavonoids	Flavonoid	478-01-3	B	305030	318070	1180100	298750	292590	263980	1.11743	0.474335	-1.07602	down
Lmhp008688	C25H42NO7P	LysoPE 20:5	Lipids	LPE	-	B	189960	199020	62620	25476	9236.8	9729.2	1.85025	0.0984101	-3.34505	down
Lmhp009349	C25H44NO7P	LysoPE 20:4(2n isomer)	Lipids	LPE	-	B	299070	116170	29751	34808	27968	26044	1.30484	0.1996	-2.32482	down
Lmhp009890	C28H52NO7P	LysoPC 20:3	Lipids	LPC	1199257-41-4	A	20484000	28505000	4613700	1701800	1482200	794740	1.79348	0.0742265	-3.75192	down
Lmhn003802	C26H26O14	Sinapoylsinapoyltartaric acid	Phenolic acids	Phenolic acids	-	B	5198.5	7495	9	10589	5826.6	11835	1.08708	2.22402	1.15317	up
HJAP064	C25H24O15	Isorhamnetin-3-O-(6''-malonylglucoside)	Flavonoids	Flavonoid	-	B	28012	24784	18332	13270	9655	3310.5	1.6412	0.368849	-1.4389	down
Zmhp005139	C25H24O15	Tamarixetin-3-O-(6''-malonyl)glucoside	Flavonoids	Flavonoid	-	B	42494	24864	9979.2	12704	11642	8791.2	1.21028	0.428477	-1.22271	down
Lmhp010394	C30H54NO7P	LysoPC 22:4	Lipids	LPC	-	B	57703	110530	71310	42567	47021	17450	1.59522	0.446843	-1.16216	down
Lmtp004044	C26H28O16	Quercetin-3-O-apiosyl(1→2)galactoside	Flavonoids	Flavonols	-	B	8578	6311	9384.2	9	9	9	2.02367	0.00111234	-9.81219	down
Lmjp002596	C26H28O16	Quercetin-3-O-xylosyl(1→2)glucoside	Flavonoids	Flavonols	-	B	6757.5	4724.5	13400	9	9	9	2.02136	0.00108512	-9.84793	down
Hmjp002999	C28H32O16	Isorhamnetin-3-O-rutinoside (Narcissin)	Flavonoids	Flavonoid	604-80-8	B	5913.2	4446.5	7435.5	9	5185.2	9	1.46815	0.292393	-1.77402	down
pmp001310	C27H30O17	6-Hydroxykaempferol-3,6-O-Diglucoside	Flavonoids	Flavonols	-	A	438010	245520	628010	319020	232000	98275	1.36983	0.495063	-1.01432	down
Lmgn004359	C33H38O18	SinapoylcaffeoylQuinic acid O-glucose	Phenolic acids	Phenolic acids	-	B	14294	9778.5	9753.6	9193.9	5448.9	9	1.11631	0.433151	-1.20706	down
Lmqp002170	C33H40O21	Kaempferol-3-O-sophorotrioside	Flavonoids	Flavonols	80714-53-0	B	13614	18147	22883	12401	9600	4990.8	1.64422	0.493957	-1.01754	down
pmp001312	C33H40O22	6-Hydroxykaempferol-3,7,6-O-triglycoside	Flavonoids	Flavonols	-	B	17394	16730	29883	15207	10074	9	1.13042	0.395113	-1.33966	down

## Sheet: TableS 7
Table S6 The Differential metabolites of of eggplant after inoculation the R.solanacearum in R-24h _Vs_R-48h.
Index	Formula	Compounds	Class I	Class II	CAS	Level	R24h-1	R24h-2	R24h-3	R48h-1	R48h-2	R48h-3	VIP	Fold_Change	Log2FC	Type
pme2268	C7H7NO2	Trigonelline	Alkaloids	Alkaloids	535-83-1	B	222590	250560	126140	909560	210740	513490	1.23479	2.72621	1.4469	up
mws0208	C6H10O4	Adipic Acid	Organic acids	Organic acids	124-04-9	B	282490	337050	300350	1054100	597720	964690	1.71851	2.84437	1.50811	up
Wmzn000227	C6H10O4	2,2-Dimethylsuccinic acid	Organic acids	Organic acids	597-43-3	B	4346.2	6976.2	5019.3	7935.7	7932.9	18925	1.33419	2.12913	1.09026	up
mws0924	C6H10O4	2-Methylglutaric acid	Organic acids	Organic acids	617-62-9	B	236530	264030	229300	929310	450640	750180	1.68199	2.91855	1.54525	up
Zmyn005209	C15H30O2	12-Methyltetradecanoic Acid	Lipids	Free fatty acids	5502-94-3	B	50856	68264	74771	85333	96841	212430	1.32638	2.03518	1.02516	up
Lmtn004049	C15H20O4	Abscisic acid	Organic acids	Organic acids	21293-29-8	B	17008	37233	21318	6533.7	7722.1	9107	1.70328	0.309199	-1.69339	down
pmb2804	C18H32O4	13S-Hydroperoxy-9Z,11E-octadecadienoic acid	Lipids	Free fatty acids	33964-75-9	B	391720	1677700	352550	230300	344720	318560	1.11986	0.368948	-1.43851	down
Lmbn005287	C18H32O4	7S,8S-DiHODE; (9Z,12Z)-(7S,8S)-Dihydroxyoctadeca-9,12-dienoic acid	Lipids	Free fatty acids	143288-65-7	B	1011900	2525300	1270600	345510	964850	632630	1.40157	0.404133	-1.3071	down
mws0983	C20H39NO2	N-Oleoylethanolamine	Alkaloids	Alkaloids	111-58-0	B	298580	101530	111380	60729	72989	81057	1.27091	0.419901	-1.25188	down
mws0884	C10H12N5O6P	Cyclic 3',5'-Adenylic acid	Nucleotides and derivatives	Nucleotides and derivatives	60-92-4	B	257460	521290	366270	156210	174270	135910	1.68288	0.40732	-1.29576	down
HJAP050	C19H21NO5	N-Feruloyl-3-methoxytyramine	Alkaloids	Phenolamine	78510-19-7	A	281830	256990	290260	826290	315250	718810	1.41678	2.24387	1.16599	up
Hmln003169	C21H24O7	Trachelogenin	Lignans and Coumarins	Lignans	34209-69-3	B	16853	57223	15939	10876	15599	13665	1.14112	0.445926	-1.16512	down
Zmhn001970	C20H22O8	Piceid	Others	Stilbene	27208-80-6	B	9	9	9	25035	9	8258.9	1.29251	1233.44	10.2685	up
HJN087	C21H22O10	Naringenin-4'-O-glucoside	Flavonoids	Flavonoid	-	B	10617	9	9	13284	13193	6434.2	1.34356	3.09461	1.62976	up
Zmpn008194	C30H48O4	Corosolic acid	Terpenoids	Triterpene	4547-24-4	B	13775	7449.8	9626.8	2327.6	5994.6	2708.2	1.52765	0.357531	-1.48386	down
Lmhp009349	C25H44NO7P	LysoPE 20:4(2n isomer)	Lipids	LPE	-	B	13349	9	24443	34808	27968	26044	1.00124	2.34967	1.23246	up
pmn001382	C25H24O12	Isochlorogenic acid A	Phenolic acids	Phenolic acids	2450-53-5	A	114160	48222	54477	240010	132380	198770	1.58587	2.63379	1.39714	up
mws1584	C25H24O12	1,3-O-Dicaffeoylquinic Acid (Cynarin)	Phenolic acids	Phenolic acids	30964-13-7	B	134040	86957	147520	343190	324360	399730	1.77123	2.89615	1.53414	up
pmn001671	C23H32O15	Furanofructosyl-α-D-(6-mustard acyl)glucoside	Phenolic acids	Phenolic acids	-	B	22986	9980.6	15504	34122	22768	42038	1.47536	2.04099	1.02927	up
Lmhn003802	C26H26O14	Sinapoylsinapoyltartaric acid	Phenolic acids	Phenolic acids	-	B	7018.8	9	9	10589	5826.6	11835	1.38312	4.01469	2.00529	up
Lmhp010394	C30H54NO7P	LysoPC 22:4	Lipids	LPC	-	B	117900	59445	124550	42567	47021	17450	1.4675	0.354554	-1.49592	down
Lmjp002596	C26H28O16	Quercetin-3-O-xylosyl(1→2)glucoside	Flavonoids	Flavonols	-	B	3903.8	4697.2	9	9	9	9	1.30101	0.00313589	-8.31691	down
Hmjp002999	C28H32O16	Isorhamnetin-3-O-rutinoside (Narcissin)	Flavonoids	Flavonoid	604-80-8	B	3328	4437.2	16938	9	5185.2	9	1.31484	0.210629	-2.24723	down
pmp001311	C27H30O17	6-Hydroxykaempferol-7,6-O-Diglucoside	Flavonoids	Flavonols	-	B	36374	9419.9	19883	66109	58801	26157	1.28271	2.30015	1.20173	up
