# Supplementary material for: Transcriptome and metabolome response of eggplant against Ralstonia solanacearum infection
Source: PeerJ. 2023 Jan 11;11:e14658. doi: 10.7717/peerj.14658 (PMC9840387; doi:10.7717/peerj.14658)
Supplement: Supplemental Information 9 [file peerj-11-14658-s009.xlsx]

## Sheet: met_cluster-6
Table S10 Differential metabolites expression pattern of eggplant innoculationinoculation with R. solanacaerum.
Metabolites ID	R0h	R24h	R48h	met_cluster
pme2268	198323	199763	544597	5
mws0208	678373	306630	872170	5
Wmzn000227	8269.37	5447.23	11597.9	5
mws0924	523853	243287	710043	5
Lmbn001754	2696900	6.43793e+06	6630200	2
Zmgn001448	3.00127e+06	7603600	7.01867e+06	2
pmb3101	3.92107e+06	9.07927e+06	8.25483e+06	2
mws1155	3422.13	4994.03	7772	2
mws0014	1.11404e+06	666603	422433	4
pmb2640	9282.87	24633.3	13523.9	3
pme1654	80380.7	202030	151180	2
Zmyn005209	91550	64630.3	131535	5
Lmtn004049	4962.57	25186.3	7787.6	3
mws0362	147077	84737.3	65725.7	4
Zmyn005026	23052.3	46201	61856.3	2
mws0369	61534.3	39028.7	26247	4
Zmpn003698	7629.87	1235.64	1126.42	6
pmb2804	3.38037e+06	807323	297860	4
Lmbn005287	930420	1602600	647663	3
pmn001689	15078.9	6888.1	7403.73	6
Lmdp003808	54017.3	21422	38426.7	1
pme2074	221162	246290	461123	2
mws0983	207783	170497	71591.7	4
mws0884	155567	381673	155463	3
HJAP050	817397	276360	620117	1
mws1546	32650	13952.9	24677.7	1
pmb3107	9	5758.37	9201.9	2
Hmln003169	89435	30005	13380	4
Zmhn001970	17714.5	9	11101	1
mws0043	601067	328103	285107	4
mws4183	17559	8024.3	13286	1
HJN087	19101.3	3545	10970.4	1
pmb3012	51360.7	20208.3	32627	1
mws0061	1.16427e+06	445767	714900	1
mws0091	813727	351467	540143	1
Lmdp003286	2.34437e+06	905770	1530900	1
pmp001309	2.07777e+06	830573	1.39233e+06	1
mws0856	683090	316790	465333	1
mws1329	625823	249537	382107	1
Zmpn008194	4139.13	10283.9	3676.8	3
Lmyp004444	3.91777e+06	1956900	2849500	1
Lmhp008688	150533	29282.7	14814	4
Lmhp009349	148330	12600.3	29606.7	6
pmn001382	204097	72286.3	190387	1
mws1584	242633	122839	355760	5
Lmhp009890	1.78676e+07	2.44893e+06	1.32625e+06	6
pmn001671	24135.3	16156.9	32976	5
Lmhn003802	4234.17	2345.6	9416.87	5
HJAP064	23709.3	7570.6	8745.17	6
Zmhp005139	25779.1	7569.73	11045.7	6
Lmhp010394	79847.7	100632	35679.3	3
Lmtp004044	8091.07	2600.83	9	4
Lmjp002596	8294	2870	9	4
Hmpp002612	436733	173673	259963	1
Lmjp002461	5613.5	14102.4	7487.4	3
Hmjp002999	5931.73	8234.4	1734.4	3
pmp001310	437180	149283	216432	6
pmp001311	90703.7	21892.3	50355.7	1
Lmtp003677	472493	166346	236703	6
Hmcp001578	90715.7	38784.3	58529.3	1
Lmgn004359	11275.4	8042.87	4883.93	4
Lmqp002170	18214.7	8062.13	8997.27	6
pmp001312	21335.7	8866.43	8430	6
