# Supplementary material for: Transcriptome and metabolome response of eggplant against Ralstonia solanacearum infection
Source: PeerJ. 2023 Jan 11;11:e14658. doi: 10.7717/peerj.14658 (PMC9840387; doi:10.7717/peerj.14658)
Supplement: Supplemental Information 10 [file peerj-11-14658-s010.xlsx]

## Sheet: Sheet1
Table S8 The 69 genes involved in alpha-Linolenic acid metabolism and plant hormone signal transduction pathway during eggplant response to R.solanacearm.
KEGG_pathway	ko_ID	P-value_gene	P-value_meta	gene ID	gene Count	gene Annotation	meta ID
alpha-Linolenic acid metabolism	ko00592	0.0424444	0.031027	SMEL_008g316430.1;SMEL_011g367940.1;SMEL_001g120560.1;SMEL_007g274300.1;SMEL_011g365890.1;SMEL_008g311290.1;SMEL_012g381040.1;SMEL_002g164180.1;SMEL_003g195990.1;SMEL_006g256830.1;SMEL_008g298210.1	11	K00232 acyl-CoA oxidase [EC:1.3.3.6] | (RefSeq) Acx1A; peroxisomal acyl-CoA oxidase 1A (A)+ K00232 acyl-CoA oxidase [EC:1.3.3.6] | (RefSeq) acyl-coenzyme A oxidase 2, peroxisomal (A)+ K05894 12-oxophytodienoic acid reductase [EC:1.3.1.42] | (RefSeq) 12-oxophytodienoate reductase-like protein (A)+ K05894 12-oxophytodienoic acid reductase [EC:1.3.1.42] | (RefSeq) 12-oxophytodienoate reductase 3 (A)…	pme1654;pmn001689
Plant hormone signal transduction	ko04075	0.00900028	0.0192966	SMEL_011g373290.1;SMEL_005g229630.1;SMEL_006g268780.1;SMEL_009g328770.1;SMEL_001g128250.1;SMEL_004g200600.1;SMEL_005g223990.1;SMEL_008g299320.1;SMEL_001g119830.1;SMEL_001g119880.1;SMEL_001g119900.1;SMEL_003g196440.1;SMEL_011g363600.1;SMEL_004g217780.1;SMEL_011g378250.1;SMEL_004g219530.1;SMEL_005g231670.1;SMEL_010g358330.1;SMEL_005g240110.1;SMEL_012g381000.1;SMEL_001g128600.1;SMEL_008g299130.1;SME…	58	K12126 phytochrome-interacting factor 3 | (RefSeq) transcription factor PHYTOCHROME INTERACTING FACTOR-LIKE 15-like isoform X1 (A)+ K13413 mitogen-activated protein kinase kinase 4/5 [EC:2.7.12.2] | (RefSeq) mitogen-activated protein kinase kinase 5-like (A)+ K13413 mitogen-activated protein kinase kinase 4/5 [EC:2.7.12.2] | (RefSeq) mitogen-activated protein kinase kinase 5-like (A)+ K13413 mito…	pme1654;Lmtn004049
