# Supplementary material for: Transcriptome and metabolome response of eggplant against Ralstonia solanacearum infection
Source: PeerJ. 2023 Jan 11;11:e14658. doi: 10.7717/peerj.14658 (PMC9840387; doi:10.7717/peerj.14658)
Supplement: Supplemental Information 11 [file peerj-11-14658-s011.xls]

## Sheet: Sheet1
							R1						R2						R3
						Days after innouculation with R.solanacearum Disease scale	0	1	2	3	4	Diease index	0	1	2	3	4	Diease index	0	1	2	3	4	Diease index
						5d	7	0	0	0	0	0	7	0	0	0	0	0	7	0	0	0	0	0
						6d	7	0	0	0	0	0	7	0	0	0	0	0	7	0	0	0	0	0
						7d	6	1	0	0	0	0.15	7	0	0	0	0	0	7	0	0	0	0	0
						8d	6	1	0	0	0	0.15	7	0	0	0	0	0	7	0	0	0	0	0
						9d	6	1	0	0	0	0.15	7	0	0	0	0	0	7	0	0	0	0	0
						10d	6	1	0	0	0	0.15	7	0	0	0	0	0	7	0	0	0	0	0
							S1						S2							S3
						Days after innouculation with R.solanacearum Disease scale	0	1	2	3	4	Diease index	0	1	2	3	4	Diease index	0	1	2	3	4	Diease index
						5d	5	1	0	1	0	0.58	6	0	0	0	0	0	6	1	0	0	0	0.15
						6d	3	2	0	0	2	1.43	6	0	0	0	0	0	5	1	1	0	0	0.43
						7d	2	2	0	0	3	2	4	1	0	0	1	0.84	5	0	0	2	0	0.86
						8d	1	1	0	0	5	3	3	1	0	0	2	1.5	4	0	2	0	1	1.15
						9d	1	0	0	1	5	3.29	2	2	0	0	2	1.67	4	0	0	1	2	1..58
						10d	1	0	0	0	6	3.43	1	1	1	0	3	2.15	3	1	0	0	3	1.86
